# Supplementary material for: Dysfunctional TRPM8 signalling in the vascular response to environmental cold in ageing
Source: eLife. 2021 Nov 2;10:e70153. doi: 10.7554/eLife.70153 (PMC8592571; doi:10.7554/eLife.70153)
Supplement: Source data 2. — Figure 1c: FLPI blood flow data; Figure 2a: VMS Blood flow data; Figure 2d: Skin Temperature; Figure 2g: Oxygen Saturation; Figure 4a: BF data with antagonist; Figure 4b: BF data A967; Figure 4c: BF data AMTB; Figure 5a: BF - Menthol; Figure 5d: BF - CA; Figure 5g: BF – Capsaicin; Figure 6a: BF – NA; Figure 6c: BF - Medetomidine; Figure 7d: Calcium imaging data; Figure 7f: Calcium imaging data. [file elife-70153-supp3.xlsx]

## Sheet: FLPI Blood flow data (Fig 1C)
Source data for Figure 1C-F
Time (minutes)	Old mice								Young mice
	O1	O2	O3	O4	O5	O6	O7	O8		Y1	Y2	Y3	Y4	Y5	Y6	Y7	Y8
-10	492.5	318.7	366	363	501.2	392	483.3	333.6		348.3	380.3	479.2	350	364.7	451.7	447.6	363.8
-9.98333	492.1	323.3	340.1	363	497.6	387.7	483	335.7		355.8	384.4	502.4	348.3	359.4	463.2	447.9	352.7
-9.96667	491.1	319.6	334.8	386.3	505.7	406.1	485.6	337.7		344.7	389.2	493.4	348	353	454.4	443.7	356.4
-9.95	491.9	319.9	331.5	366.2	500.8	412.1	490.3	328.4		348.4	384.7	484.4	348	351.3	469.6	451.7	349.1
-9.93333	489.4	316.5	334.5	381.6	504.4	442.3	494.4	323.7		374.9	390.1	438.2	347.1	362.3	457.8	455.4	344.7
-9.91667	496.8	312.6	347.9	356	500.6	471.4	489.7	321.4		359.4	389.2	480.4	347.9	356.8	457.1	453.3	360.5
-9.9	494.4	319.9	372.2	360.3	507.9	490.9	494.3	337.5		348.7	387.3	503.4	344.5	363	452.7	453.9	353.2
-9.88333	496.6	321.7	405.7	367.8	499.3	478.9	488.9	340.5		354.1	391.4	449.4	337.2	362.1	452.1	448.8	360.8
-9.86667	496.1	320.2	371.4	367.1	499	482.4	481.2	340.9		354	383.3	422.3	343.1	356.8	458.1	441.2	353.2
-9.85	485.6	317.4	374.5	377.4	510.2	478.6	487.1	342.7		343.6	383.9	413.4	349.9	364.8	458.9	441.9	353.9
-9.83333	492.9	319.7	357.6	370.1	511.8	466.8	483.6	329.1		364.7	370.2	461.5	344.8	358.9	455.5	450.6	346.2
-9.81667	500.8	327.7	345	361.4	518	467	490	329		346.8	383.9	486.1	344.1	367.6	451.6	443.2	354.7
-9.8	493.2	322.8	372.7	372.3	503.3	467.9	486.5	332.5		342.6	386.6	486	350.1	359.3	457.1	440.4	352.4
-9.78333	493	317.8	384.2	365.1	486.6	463.7	487.8	329.5		347.3	386.9	477.4	350	358.2	457.9	438.3	358.1
-9.76667	490.4	318.8	376.2	375.4	497.3	472.6	480.2	328.2		347	385.3	459.8	349.1	364.1	447.6	448.4	357.1
-9.75	497	324.2	357	382.8	499.6	462.6	484.3	324.6		347.9	385.9	449.6	342.1	361.4	448.8	447.2	351.8
-9.73333	495.3	324.9	340.6	387.3	487.8	450.8	484.9	327.5		350.6	381.7	458.6	341.1	358.5	468	446.2	358
-9.71667	493.3	323.3	334.9	374.1	501.8	480.4	483.3	322.7		344.9	391.5	486.6	341	360.7	464.5	440	354.5
-9.7	503.4	326.5	351.4	364.5	498.5	488.7	482.2	335.1		342.4	389.3	504.2	337.5	361.8	471.9	446.9	349.8
-9.68333	494.4	325.2	381.3	371.8	498.9	466.5	484.6	325.5		349	374.3	440	341.4	366.3	487.5	442.7	361.2
-9.66667	497.5	322.4	387.1	361.6	490.3	465.2	488.4	335.4		353.3	371.5	434.8	350.6	366.9	463.7	446.4	353.2
-9.65	496.2	321.2	374	358.5	507.3	471.1	488.1	321.2		348.7	378.8	481.7	361.3	367.9	457.9	444.3	375.5
-9.63333	494.3	325.3	378.3	362.4	506.2	452	480.2	327.1		351.6	388.5	484.5	355	361.9	456.3	447.5	352.6
-9.61667	489.7	318.1	364.2	369.8	510.3	456.3	483.5	322.7		353.7	388.9	430.5	353.3	359.4	463.8	441	359.9
-9.6	495.1	316.3	354.5	382.1	503.1	467.3	483.1	324.7		350.5	388.1	437.8	347	366	466.6	448.8	355.7
-9.58333	493.3	322.1	360.1	377.7	505.6	480.9	497.7	324.1		342.3	381.1	481.2	353.1	364.3	474.7	441.2	353.4
-9.56667	490.4	322.9	351.4	364.1	493	483.6	496.2	327.5		343.8	377.6	483.6	347.8	364.9	462.9	441.9	353
-9.55	495.2	324.7	348.5	356.2	512	476.2	491.7	331.4		339.6	378.8	483.1	348	359.8	462.1	452.4	359.1
-9.53333	494.2	318.9	345.5	364.7	506.8	478.6	487.6	322.4		338.2	378.1	484.7	341.9	362.6	458.6	444.3	348.6
-9.51667	492.3	321.6	339	361.5	500.9	477.2	494	314.3		346.7	374.6	452.1	337.7	356.9	452.9	446.6	359.3
-9.5	489.4	321.1	339.9	379.2	503.6	471.8	494.9	321.8		346.1	386.2	451.1	350.9	356.1	466	452.1	355.6
-9.48333	493.4	324.5	346	366.9	497	484.9	482	341.9		352.9	403.3	467.4	348.4	367.3	460.8	451.2	350.8
-9.46667	504.3	318.9	376.3	373.9	505.7	487.6	485.5	347.2		357.3	404.8	498.2	350.6	366.2	458.4	457.1	347.5
-9.45	494.5	324.2	361.3	374.9	506	466.3	479	331.5		350.1	402.4	486.8	348.4	359.1	446.8	449.2	355.7
-9.43333	488.9	323.2	353.3	368.9	498.2	456.5	487.6	336.3		349.2	386.5	480.9	342.9	361.6	451.3	438.7	356.8
-9.41667	502	324.8	341.8	358.6	506.7	455.2	492.3	323.1		355.9	371.4	496.6	342.1	354.2	444.1	444.1	356.1
-9.4	498.5	319.8	361.9	368.5	503.5	465.4	486.8	329.9		344.8	374.5	492.6	351.5	360.1	453.5	441.4	354.3
-9.38333	498.9	320	400	381	503.9	462.5	483.5	331.7		338.9	390.5	462.7	345.9	362.6	472.1	441.9	351.4
-9.36667	497.3	325.2	382.7	363.7	509.2	445.6	486.5	338.9		338.1	385.7	444.8	350.3	363.8	467.7	443.7	345.9
-9.35	502.2	321.6	365.7	370.9	512.5	451.1	487.8	336.4		344.9	383.4	478.7	353.5	364.8	459.3	449.1	360.7
-9.33333	506.4	312.4	353	354.6	498.2	454.5	487.1	325.7		340.7	376.1	474.6	346.2	365	461.6	443	350.6
-9.31667	499.1	319	348.7	363.6	496.3	446.3	490.5	327.7		347	376.9	440.4	334.8	365	453.3	443.9	363
-9.3	486.9	325.9	345.5	374.3	497.8	454.7	489.2	320.2		353.1	385.6	452.2	337.6	360.7	454.8	444	355.2
-9.28333	480.9	318.2	354.6	385.3	517	447.2	492.5	326.9		353	401.5	481.4	336.2	364.4	446.3	462.2	355
-9.26667	500	319.8	375.7	383.3	516.1	449.6	497.3	327		350.4	395.9	496.6	338.6	369.2	468.5	452.5	349.8
-9.25	496.5	325.2	355.2	368.3	497	462.9	492.7	340		347.5	382.1	441.6	342.4	362.1	468.1	448.6	351.7
-9.23333	497.8	320.7	349.8	371.5	515.2	459.5	486	341.7		356.6	376	438.5	346.4	368.9	463.7	455	352.8
-9.21667	487.6	317.5	354.3	372.8	502.9	443.5	486.9	332.5		344.8	376	478.7	346.9	368.1	459.6	447.2	355.6
-9.2	481	319.7	353.2	391.1	505.6	462.1	487	329.5		341.5	383.8	489.3	345.3	371.5	448.7	439.2	346.4
-9.18333	488.8	327.7	359.9	363.3	497.3	458.6	480.1	328.2		342.8	391.8	481.3	349.4	369.3	455	440.8	360.8
-9.16667	486.4	340.1	361.7	364.8	492.7	454.6	482.6	327.2		351.6	382.5	494	343.9	369.9	463.6	449.6	351.5
-9.15	487.8	316.7	366.3	356.3	505.9	460.1	489.9	321		346.8	377.7	453.4	342.3	363.1	470.9	451.7	351.1
-9.13333	488	316.1	360.9	349.1	505.1	455.7	504.7	329.6		347	382.3	448.7	345.5	372.5	470.1	456.3	347.5
-9.11667	483.7	320.3	363.6	371.5	512.8	448.2	491.1	330		351.3	381.2	487.9	348.5	378.1	464	448.3	356.6
-9.1	482.2	320	372.6	368.5	505.2	447.2	485.8	334.3		351	385.3	504.4	340.3	366.8	468.3	453.2	360.4
-9.08333	484.6	315.7	345.3	371.5	514.5	448.8	482.5	334.9		353.6	388.5	445.3	347	372.2	461.1	449.6	356.6
-9.06667	483.2	321.1	367.5	381.4	520.1	451.6	485.5	346.2		347	382	445	339.2	367.7	456.7	447.3	356.1
-9.05	496.9	319.3	361.9	362.9	528.7	452.8	483.3	351.2		348.7	380.3	471.8	343.4	370.6	452.6	440.1	357.7
-9.03333	491.8	319	354.2	364.7	509.9	446.9	484.8	340.7		343.8	378.3	475.4	341.3	365.8	459.9	440	353.6
-9.01667	477.3	328.5	355.8	372.7	495.3	446.1	485	329.7		341.4	395.3	469.9	347.1	368.6	466	443.5	355.7
-9	484	325.5	339.5	363.5	507.1	447.7	491.9	328.2		347.1	387.3	452.7	347.9	369.8	467.7	444.8	350.8
-8.98333	480.5	309.5	340.8	370.8	499.2	439.3	490.3	347.9		345.3	385.3	444.3	347.1	367.4	493	449.3	349.2
-8.96667	488.7	317.7	333.2	372.7	503.4	452	490	331.6		342.4	380.7	482.1	359.1	374.8	511.2	443	354.2
-8.95	493.3	320.6	339.9	358.3	518.6	442.5	486.5	328.5		359.4	376.6	491.5	351.2	365.5	491.1	444.7	357.5
-8.93333	480.1	318.3	389.3	371	509.4	443.8	480	323.7		354.7	390.8	436.6	347.6	376.3	477.2	445.8	349.3
-8.91667	474.8	317.2	396.8	374.5	509.1	452.6	487.8	327.4		342	389.2	475.9	342.8	369.1	465.8	449.4	356
-8.9	487.1	324.8	371	382.7	500.4	444.3	486.2	329.7		351.5	386.4	498.5	340.4	374.2	473.8	453.4	350.8
-8.88333	482.7	318.9	368.4	365.7	510.4	458.7	490.4	324.8		346.7	389.5	493.7	335.7	368.8	472.2	445.3	363.1
-8.86667	489	316.4	367.2	369.4	506.6	463.3	490.9	337.9		344.4	381.3	459.4	336.8	371.6	465.1	444.2	356.1
-8.85	489	319.5	354.1	361.3	505.2	452.7	484.9	339.7		352.7	377.6	478.1	337.8	365.9	478.9	444.9	356.9
-8.83333	486.4	316.5	357.5	364.5	524.1	466.8	487.6	338.2		349.5	388.3	484.1	341.4	364.3	470.3	449.3	355.3
-8.81667	486.1	310.9	373.5	364.1	513.6	458.3	480.2	335.4		343	392.4	479.7	348	366.6	455.3	450.8	355
-8.8	486.9	318.8	354	368.3	504.4	446.8	480	343.7		353.4	392.9	442.8	351.5	366.9	458.5	444.9	356.7
-8.78333	480.9	325.9	370.4	383.6	504.1	452.2	484.3	338.8		344.4	380	447.3	348.5	364.4	465.9	442.4	341.4
-8.76667	486.2	330.3	355.4	387.4	506.6	446	497	331.2		344.1	376.5	481.6	348.1	363.2	474.6	445.5	361.8
-8.75	492.1	324	346.4	367.2	509.5	445.1	490.1	324.1		347.5	381.3	486.3	373.9	374.3	464.6	445.1	360.2
-8.73333	483.4	323.1	360.8	364.4	505.6	445.9	491.7	330.1		352.3	386.2	464.4	434.5	369.7	487.4	452.8	367
-8.71667	496.9	320.4	350.6	366.7	516.3	445.1	488.5	337.8		346	400.7	420	477.3	370.8	525.1	446.1	364.4
-8.7	492.7	319.2	376.9	367	506.5	433.8	491.5	329.3		355.5	394	440.7	430.3	367.5	477.5	450.3	352.8
-8.68333	485.2	317.3	372.7	364.4	500.9	449.5	491.1	330.8		349.9	381.9	477.3	359.1	373.1	460.6	444.9	367.7
-8.66667	491.9	318.8	354.8	366.6	501.8	441.3	504	329.2		353.4	393.2	435.5	353.8	379.1	465.3	448.4	354.1
-8.65	491.1	320.7	358.4	373	493.3	446.2	486.7	330.8		355.7	389.6	452.4	353.1	366.9	473.7	445.5	360.9
-8.63333	499.7	319.2	372.8	359.2	487.9	456.4	481.8	334.4		344.7	389.1	458.1	351.3	367	470.5	450.3	362.7
-8.61667	491.3	323.4	361.7	365.9	500.1	454.3	489.8	329.7		345.8	387.3	480.5	352.8	364.4	483.9	445.7	364.7
-8.6	484.1	322.2	373.2	379.8	507.8	454.9	483.9	330.8		352	381.9	499.1	359.9	364.9	490.9	447.7	365
-8.58333	484.9	328.1	371.3	372.2	511.4	444.6	490	327.5		343.4	373.3	494.7	364.3	368.4	491	445.4	352
-8.56667	488.4	322.8	378.8	362.5	498.1	442.4	486.5	327.1		351.7	377.4	463	357.1	367.2	464.2	445	367.6
-8.55	490.7	321.2	379.8	364.7	491.1	446.4	482.6	327		352	380.5	473.4	352.7	366.2	461.4	456.2	355.8
-8.53333	489.2	321.9	355.8	384.8	500.5	439.1	502	331.3		341.6	389.6	494.7	353	376.4	472.3	448.3	375
-8.51667	491.6	325.4	349.9	378.9	504.4	428.6	496.8	329.3		347.1	388.2	497.5	348.7	376.1	471.2	455	362
-8.5	489.4	323.3	350.9	365.2	506.6	441.9	484.9	329.9		350.5	388.9	468.5	349.8	370	462.4	448.1	365.5
-8.48333	485.6	319.6	395.9	370.2	502.6	435.9	482.4	338.6		338.8	379.5	427.4	346.5	366.5	457.7	443.7	359
-8.46667	491.1	314.8	426.3	363.1	497.8	437.7	485.5	349.3		346.8	373.9	443.5	349.5	363.5	458.8	446.6	360.7
-8.45	486.7	315.8	454.6	369.9	498.8	435.4	475.6	350.8		352.2	375.7	463	347.3	368.3	457.2	440.9	359.2
-8.43333	485.2	317.7	406.5	371.7	510.2	431.6	481.1	333.7		354.6	376.8	498.4	346.2	364.6	453.6	442.7	356.4
-8.41667	485.9	321.4	373.2	370.2	506.6	441.5	481.9	343.5		354.1	381.3	491.1	349.5	364.9	456.5	440.4	363.8
-8.4	474.7	318.5	368.7	370	494	441.1	484.6	354.3		354	386.2	479.8	343	366.7	454.3	447	356.2
-8.38333	482.7	318.1	359.4	373.5	507	435.8	488.4	355.8		348.8	381.7	461.8	340.4	361.8	459.2	445.3	359.5
-8.36667	485.6	324.9	347.8	377.4	502.7	445.5	485.5	338.7		356.8	379.4	464.6	341.8	366.3	462.5	440.7	351.3
-8.35	493.7	318.1	344.5	375.3	493.4	431.2	488.5	339.8		357.8	367.8	483.1	344.6	374.7	460.3	453.1	365.7
-8.33333	485.3	316.3	337.2	369	513.8	444	478.6	333.9		347.6	377.5	497.7	343.2	368	469.6	449.6	364.2
-8.31667	486.8	316.9	354.3	365.5	518.3	431	478.9	340.9		351.4	390	485	344.8	372.3	461.3	448.2	364.9
-8.3	483.5	314.4	347.1	366.8	523.2	432.7	482.5	334.1		351.1	387.4	444.4	344.1	370.3	457.6	449.8	367.6
-8.28333	483.9	314.9	355.7	360.1	521.3	446.8	486.4	328		343.2	387.1	458.7	341.4	366.6	457.9	441.3	361.9
-8.26667	490.9	319.3	354.2	379	518.4	438.3	478.3	313.3		346.5	377.5	502.2	350.6	367.8	463.2	438.4	359.4
-8.25	499.6	319	360.9	377.3	525	451	486.7	332.1		341.7	375.3	496.8	344	371.4	463	446.7	368.6
-8.23333	492.2	323.3	373.1	371.8	517.2	438.9	477.4	340.7		342.8	377.6	441.6	344.9	375.4	463	449.6	368.1
-8.21667	491.2	320.5	351.4	387.5	524.8	436.4	478.8	344.4		354.2	386.6	440.2	347.6	368.1	469.9	447.3	368.9
-8.2	491	315.7	351.1	360.3	518.1	448.2	479.8	328.5		343.7	386.9	477.2	336.7	367.2	471.7	451.4	361.2
-8.18333	500.5	322	336.3	373.9	510.2	436.8	486	332.4		346.5	373.2	492.6	340.4	364.4	465	449.3	363.6
-8.16667	502.7	325.5	336.9	372.3	507.4	435.2	486.9	332.9		353.9	373.9	492.1	342.7	367.5	459.8	452.5	372.6
-8.15	496	324.2	325.7	366.8	526.9	435.9	491.3	325.2		350.5	387.8	479	346.4	369.7	463.4	447.7	360
-8.13333	493.4	315.4	352.8	369.6	512.3	429.1	485	319		350.1	394.9	464.3	350.4	370	458.7	442.8	369.5
-8.11667	493.9	315.1	389.3	376.9	522.4	444.6	484.1	319		347.4	408.8	444.2	347.5	372.6	461.6	451.6	357
-8.1	494.9	314.1	409.8	370.9	517.7	425.1	481.4	328.5		344.5	385.6	445.8	347.9	372.9	462.8	451.1	353.5
-8.08333	497.6	311.4	382.3	384	503.3	442.3	486.2	354.9		338.9	372.1	467.6	347.1	372.1	451.7	438.9	366
-8.06667	493.6	318.8	354.4	386.6	500.4	432.5	482.6	346.3		350.2	372	477.5	347	374.6	460.6	441.6	353
-8.05	494.8	317.2	335.9	367.9	513.9	439	481.2	352.1		347.4	389.3	471	338.4	365.4	460.1	446.3	359.9
-8.03333	492.4	315.3	345.5	364.5	520	432.9	494	341.6		347.1	396	456.3	338	365.1	451.4	444.3	369.5
-8.01667	501.6	322.8	343.3	375.3	514	436.5	495.7	334.2		355.7	380.4	431	344.1	367.6	464.9	457	361.3
-8	501.1	320.4	348.2	369.9	520	428.3	487.3	334		350.8	380.1	447.4	345.7	371.4	472.8	457	372.3
-7.98333	489.8	319.2	346.3	357	520	429.8	496.6	335.7		367.4	390.4	491.2	342.5	375.4	485.1	446.6	366.8
-7.96667	502.1	321.6	372.8	379.5	511.4	437.8	484.8	332.5		354.9	395.2	495.3	347.3	368.1	492.8	446.1	360.9
-7.95	494.2	315	414.5	384.3	499.8	431	484.1	331.2		352.4	389	457.9	346.2	362.8	461.8	449.5	383.5
-7.93333	496.6	319.3	367.4	378	510.3	447.4	484	338.8		343.4	386.4	438.1	346.9	366.4	459.4	445.6	372.7
-7.91667	504.7	324.2	365.3	376.3	500.5	427.2	486.6	328.6		353.4	371.4	489	351.3	373	467.7	447.7	358.3
-7.9	499.8	323.2	349.5	369.1	524.3	436.5	483.5	339.3		350.5	371.9	500.2	342.4	363.5	464.5	455.7	367.5
-7.88333	505.2	322.2	356.8	354.3	518	424.8	483.9	339		357.8	392.7	503.5	351.6	372.6	453.7	453.4	359.3
-7.86667	495.5	318.6	381.2	365.3	529.2	436.2	478.8	345.9		359.7	395.6	476.3	347.6	370.3	465.2	454.8	359.9
-7.85	507.2	325	380.2	378.9	516.9	430.8	479	331.3		347	388.2	481.2	345.4	368.3	469.4	455	376.4
-7.83333	507.9	324.1	363.6	374.7	507.5	444.8	478.1	343.1		342.7	384.6	487.1	340.7	365.4	468.2	449.8	360.5
-7.81667	499.3	321.4	361.4	371.5	520.9	439.8	482.3	327.5		350.7	381.5	458.5	345.3	369.4	461.1	453.4	373
-7.8	503.4	321.1	343.8	359	523.6	429.6	479.5	345.2		348.4	390.6	435.6	343.3	370.8	455	450.5	362.6
-7.78333	509.1	320.1	343.1	368.5	530.9	431.7	484.2	332.1		342	395.3	450.6	341.3	372.7	457.6	450.9	362.9
-7.76667	501.2	322.6	330	374.1	513.7	429.4	481.4	338.9		348.1	382.1	491.6	341	366	466.6	452.7	357.8
-7.75	498.4	326.4	361.1	382.7	514	455	481.1	336.4		344.5	385.5	487.6	343.6	373.8	457.4	450.4	367.5
-7.73333	490.3	325.2	380.9	376.9	520.9	440.3	481	324.8		344.1	375.6	475	343.1	374	457.9	456.1	361
-7.71667	498.7	322.4	364.6	368.3	521	454.7	478.4	327.6		348.3	376.8	466.4	347.3	369.7	464.9	452.6	370.5
-7.7	508.5	323.8	357.2	362.9	500.2	451.5	480.6	334.9		343.7	381.3	454.8	351.4	370	459.8	446	359.7
-7.68333	506.3	327.4	359.6	361.3	520.8	447.6	479.2	339.3		354.3	393.1	468.8	345.9	364.8	461.7	453.8	366
-7.66667	506	321	387.6	368.8	532.2	440.2	479.9	335.6		352.3	396.5	498.4	350.3	368.4	462.8	450.5	357.4
-7.65	510.3	324.5	394	376.8	530.3	439.2	480.9	326.4		351.2	384.8	479.9	353.5	372.4	471.6	457.9	357.9
-7.63333	495.3	324.1	362	373.5	523.1	461.5	492.2	329.5		355.3	383.2	433.3	341	371.2	469.4	460.6	382.2
-7.61667	494.2	321.4	359.4	358.4	516.1	436.9	491.2	323		344.7	377	421.8	342.7	366.7	461.3	467.9	372.5
-7.6	503.5	322.8	355.6	364.1	512.6	443	492.8	344.6		346.7	382.2	468.7	340.4	365.2	462.8	448.1	390.2
-7.58333	489.2	322.1	354.2	371.8	517.3	435.2	482.6	343.2		358.2	388.1	498.4	340.9	371.9	450.9	442	368.4
-7.56667	500.3	320.3	336.7	367.6	504.9	437.6	482.9	339.6		349.4	397.5	492	338.4	377.2	455.3	452.4	372.4
-7.55	507	316.6	342.2	363.6	505.9	451.8	484.7	330.4		350.8	391.9	434.1	345.8	380.5	453.3	443.4	367.7
-7.53333	500.9	315.2	363.6	364.8	512.9	445.1	483.2	342.2		354.4	389.4	423.6	349.4	376.6	450.4	437.9	357.6
-7.51667	496.7	320.2	391.6	382.3	514.7	451.9	483.9	329.9		342.8	383.9	438.6	347.3	373.5	454.4	451	362.3
-7.5	501.3	318.3	372.1	374.3	513.2	445.1	486.6	336		348.2	377.1	484.8	347.9	374.8	459.2	464.8	364.6
-7.48333	491.5	319.8	359.9	363.7	510.4	449.3	486.1	340.3		348.9	389.1	494.5	344.5	375.8	471.1	458.1	365.8
-7.46667	504	321.7	359.1	372.6	508.3	446.5	480	345.2		342.9	400.3	473.3	343.2	371.7	459.8	452	372.9
-7.45	500.5	323.7	364.2	379.9	501.1	437.4	480.9	340.7		355.1	418.2	461.8	339.6	373.7	455.6	451.1	363.5
-7.43333	498.3	319.6	362.3	378.3	511.4	451.8	482.7	338.4		347.2	463.9	472.3	346	367.9	457.7	449.3	369.1
-7.41667	500.6	317.4	369	365.9	514.5	430.4	471.7	332		344.4	405.2	485	346.9	379.2	466.6	456.8	367.3
-7.4	498.4	320.5	381.1	374.6	508	454.3	485.8	336.3		356.2	395.5	463.4	351.3	374.7	452.2	454.4	371.4
-7.38333	501.5	323.5	396.6	385.3	513.2	435.9	478.2	330.9		381.1	389	444	343.3	380.1	449.4	448	366.7
-7.36667	498.5	323.1	356.3	362.6	519.1	448.1	482.3	334.4		406.1	395.9	457	337	368.8	457.7	446.3	367.8
-7.35	494.6	319.6	354.3	371.6	516.4	444.6	483.8	336.7		374	392.5	466.5	335.3	370.7	466.6	445.2	366.2
-7.33333	494.9	319.9	360.1	378.9	504	449.3	478.8	342.1		361	389.5	478.2	336.8	373.6	463.5	446.8	360.8
-7.31667	499.3	325.2	361.7	361.7	499.7	450.8	474.6	342		371.4	390.8	478.9	345.6	380	462.2	453	373.1
-7.3	491.3	325.9	362.8	374.9	513.8	437.1	480.1	348.1		375.4	387.5	486.8	345.9	379.1	460.3	448.7	362.6
-7.28333	495.4	328.6	369.9	375	511.4	451.7	486.9	345.4		367.3	379.3	474	351.2	375.6	473	449.8	366.4
-7.26667	495	328.1	400.2	392.3	503.3	449.4	479.2	334.7		373.1	386.8	467.1	355.3	373.3	454.8	455.2	368.6
-7.25	491.5	322.8	375	379.9	509.1	456	477.3	339.3		365.2	390.4	484.3	344.7	368.7	449.8	455	367.2
-7.23333	501.5	330.8	359.4	373.9	504.7	433.5	483.1	350.3		371.9	393.5	492.7	341.5	372.4	462.1	462.8	370.5
-7.21667	494.1	332.7	352.1	367.1	510.1	433.9	477.8	335.3		376.3	387	472.2	341.1	369.5	461.1	457.8	373.5
-7.2	494.9	318.3	344.2	371.3	505.7	442.6	482.3	336.8		376.9	389.6	466	340.1	375.1	474.9	446.7	358.4
-7.18333	505.4	318.9	355.3	362.4	511.1	429.1	482	338.7		382.2	391.7	486.7	336.6	375.9	464.6	454.7	374.5
-7.16667	495.5	323.3	337.7	366.4	507.6	427.3	480.3	326.9		378.6	389.4	498.2	343	380.3	460.6	445.5	362
-7.15	497.7	330	348.3	366.9	519.2	433.1	474	344.3		382.4	383	453.1	345.6	380	462.7	441.6	364.6
-7.13333	503.1	331.7	391.3	381.7	519	426.1	477.5	339.7		393.3	403.8	472	348.5	369.6	463.8	446.3	358
-7.11667	500.4	326.8	423.9	417.4	512.1	432.9	477.1	336.5		396.5	392.7	451.3	348.1	371.7	461.4	446.9	366.7
-7.1	498.3	327	402.4	377.3	509.4	436.4	476.1	337.8		393.5	388.6	435.5	343.7	374.6	448.1	452.2	371.3
-7.08333	505.8	325.3	373.5	378.8	512.5	433.5	476	343.2		400	389	434.2	347.4	374.1	452.3	450.3	370.2
-7.06667	500.8	323.3	384.3	378.1	512.9	431.3	482.1	347.3		396.5	386.4	462.6	340.1	370.6	456.4	450.9	370.9
-7.05	494.1	318.7	358.1	356.4	514.7	437.1	480.3	339.3		375.3	379.1	490.6	346.9	366.6	457.8	454.4	372.7
-7.03333	485.4	316.4	354.6	376.8	516.7	438.7	480.9	334.7		398.4	387.7	480.6	342.7	375.6	470.9	454.9	385.1
-7.01667	489.4	314.3	345.4	368.3	524.7	439	482.7	331.5		411.9	390.5	468.8	338.6	369.9	456.3	448.1	374.6
-7	495.1	326.1	347.7	364.6	517.2	443.3	475.2	312.9		395.6	390.1	463.8	351.9	370	461.2	446.3	364.6
-6.98333	496.7	322.6	371.3	364.1	517.9	425.7	478.5	326.8		395.9	390	444.9	344.2	378.6	470.5	445.2	369.3
-6.96667	490.9	320.3	409.1	364	517.1	432.9	473.7	323.5		382.2	384.8	462.3	347.5	378.1	453.6	446.8	356.9
-6.95	485.8	319.2	389.1	387.3	517.9	440.8	481.7	336		361.3	389.3	461.2	342.7	382.3	448.8	457.3	363
-6.93333	486.8	322.5	382.1	392.2	514.5	427.1	480.2	334.3		365.4	402	443.7	337.8	386.4	468	454.5	364.7
-6.91667	489.6	322.9	359.5	378.2	514.1	426.2	482.6	341		367.6	386.4	450.9	343.2	380.9	456.8	449.7	363.2
-6.9	486.5	316.9	358.2	378	501.9	426	479.5	331.5		362.8	390.4	470	343.9	383.6	453.5	443.9	373.4
-6.88333	486.9	322.2	362.4	382.3	519.3	431.2	482.5	332.8		364.7	387.5	462.2	351.8	369.2	466	447.4	377.4
-6.86667	482.7	316.8	374.2	362.2	526	419.8	476	326.1		358.9	390.5	446.5	356.3	374.2	474.7	446.2	371
-6.85	485.5	326.5	392.2	363.8	529.5	435.5	474.3	326		361.6	390.1	465.1	347.4	373.2	468.9	444.3	380.5
-6.83333	485.1	315.7	408.5	376.1	510	420.4	473.2	339		358.5	392.6	478.8	343.6	373	457.7	441.4	374.9
-6.81667	480.7	321.1	387.3	374.3	505.7	422.6	477.3	339.9		359.8	389.5	429.7	339.6	372.1	456.2	450.6	376.7
-6.8	477.5	319.3	355	377.5	524.1	423	482.2	346		378.1	383	439.5	335.6	370.3	462.9	455.3	365.7
-6.78333	483.1	323.4	376.6	381.4	516.2	412.6	480.3	331.3		362.5	382.1	473.7	337.7	374.4	461.3	441.2	369.4
-6.76667	488.2	327.4	367.4	368.1	509.1	428.5	475.7	339.7		361.2	388.9	443.7	346.6	375.8	457.6	451.4	363
-6.75	484.6	323.6	374.8	363.7	517.7	423.7	482.9	340.8		367.1	391.6	438.8	347.8	380.3	456.2	455.4	369.9
-6.73333	485.8	323.1	394	370	505	422.2	477.8	338.4		365.3	385	473.6	348	374	465.5	449.9	355.3
-6.71667	478.2	322.1	401.8	378.6	513.6	422	472.8	333.7		361.6	392.8	478.3	343.7	373.1	467.7	444.8	367.1
-6.7	481.5	321.2	374.3	373.8	497.5	423.7	484.2	327		350.7	382.6	472.8	340.5	373.9	451.5	440.6	363.6
-6.68333	475.9	321.9	378.4	374.8	510	427.4	485.8	325.3		351.8	390.7	460	338.3	366.2	447.6	434.9	381.2
-6.66667	478.6	315.9	371.1	363.7	507.4	415.8	487.7	318.1		354.6	389.2	474.7	342.4	368.6	452.3	435.9	368.9
-6.65	476.3	317.7	390	372.6	510.5	410.8	488	324.9		347.2	395.9	502.6	347.2	382.8	461.5	443.8	377.6
-6.63333	472.6	322.3	383.1	364.3	510.9	418.8	473.3	321.5		382.5	402.9	503.8	341.8	381.2	459.3	449.2	368.4
-6.61667	485.9	313.4	380.4	376.1	504.9	414.6	475.6	324.5		369.1	383.1	446.9	347.2	385.4	461.6	455.1	381
-6.6	483.4	322.6	378.3	379.5	506.7	414.1	482.9	318.9		383.7	379.6	434	349.6	379	467.1	440.3	368
-6.58333	487.4	322.1	352.1	372.1	519.1	426.1	481.3	325		377	375.6	446.1	338.7	382.5	458.4	441.8	381.8
-6.56667	480.1	319.4	365	376.3	528.5	406.1	487.1	329.3		356.3	378.5	473.7	335.5	376.9	446.8	442	361.2
-6.55	487.8	329.4	390.1	376	517.7	415.5	468	327.3		358.6	380.7	482.6	337.7	371.8	455.6	455	378.3
-6.53333	488	330.8	403.8	370	511.9	394.3	478.4	335.7		359.8	384.4	454.4	343.1	378	471.5	455.9	369.4
-6.51667	486.3	318	419.5	383.8	510.3	412.2	483.2	344.6		347.9	392.7	457.5	344.7	367.6	462.4	443.9	356.1
-6.5	472.2	321.5	376.7	365.8	504.8	431	475.3	337.2		351.4	403.3	456.2	344.1	370.5	461.2	449.2	379.4
-6.48333	470.3	321.9	360.5	370.3	507.6	443.1	476.8	331.8		361.4	392.7	455.2	346.6	369.2	461	446.4	371.3
-6.46667	481.3	324.6	353.2	357.9	517.5	436.1	470.1	320.7		354.1	381.7	440.3	350.4	374.2	454.1	447.8	357.2
-6.45	482.8	321.5	350.4	361.4	499.8	445.5	480.4	327.9		360.1	376.8	459.1	344	385.3	453.1	443.6	370
-6.43333	489	328.8	342.3	375.8	503.4	422.6	479.2	321.1		354	374.4	450.4	335.4	372.9	457.3	441.4	357.9
-6.41667	481.2	330.7	352.4	382.9	515.2	443.7	481.6	331.4		362.6	369.7	438.8	335	374.7	464.8	450.6	358.9
-6.4	473.2	326.6	346.9	376.1	515.9	442.2	472.4	341.4		360.4	388.1	447.6	333.3	376.7	459.8	445.8	368.5
-6.38333	474.8	332.1	370.3	379.5	508.2	458.5	480.7	331.5		350.5	392.3	484.3	346	377	470.3	443.4	368.1
-6.36667	477.6	327.7	413.3	389.4	507.2	458.1	473.2	330.2		343.2	392.9	477.1	344.3	374.4	457.1	443.9	374.9
-6.35	471	331.4	390.6	370.9	507	448.5	478.2	335.2		360.3	386.9	428.6	346.6	373.2	448.4	444	368.9
-6.33333	477.1	329.3	387.5	379.6	509.6	421.3	476.3	341.9		352.3	390.4	425.5	341.8	374.8	452.4	441.4	382
-6.31667	496	324.7	357.7	360.9	503	419.3	479.5	324.7		354.6	386.6	478.7	339.4	375.8	458.1	447.1	374.2
-6.3	473.5	325.8	369.2	368.8	518.6	442.4	480.8	331.9		354.1	390.4	498.8	336.5	374.2	462.3	449.6	373.2
-6.28333	471.3	323.4	371.6	362.1	534.5	444.6	485.3	331.1		342.8	395.2	486.9	340.4	376.6	470.7	450.8	367
-6.26667	482.3	323.1	385.8	368.1	525.4	452.7	477.3	340.5		347.3	380.3	465.4	338.3	387.3	451.9	447.5	366.1
-6.25	473.4	327.3	378.2	369.7	516.4	440.9	477.9	338.3		360.9	393	434.8	338	385.3	456.3	452.3	379.9
-6.23333	480	332.2	375.4	376	505.7	454	473.7	326.8		350.6	394.7	440.2	338	392.8	453.4	453.8	361.8
-6.21667	476.5	322.5	388.9	389	519.8	442.8	475.7	324.4		356.1	392.4	453	343.2	374	457.4	447.1	370.6
-6.2	479.5	326.4	355.3	365.7	511.3	459.4	487.2	324.9		361.2	393.8	451.3	341.3	378.3	453.6	441.8	366.6
-6.18333	478.2	324.3	372.3	377.2	509.3	439.2	478.4	340.6		355	379.3	458	340.2	373.7	451.4	446.3	363.5
-6.16667	483.2	319.7	383.3	379.6	511.6	443.3	485	332.3		355	375.6	464.9	338.3	376.6	458.8	451.2	363.1
-6.15	477.8	326	375.3	387.7	518	420.6	476.3	329.4		359.3	384.6	464.1	335.4	382.1	455.5	451	366.5
-6.13333	485.8	317.4	372.4	368.1	514.5	433.9	477.8	327.3		353.9	385.8	461.4	347.2	382	449.9	449.3	370.4
-6.11667	475.6	317.9	370.3	372.3	500.2	414.1	478	321.9		346.2	381.7	439.4	347.9	391.5	449.1	455.1	375.2
-6.1	479.4	323.2	373.5	364.3	511.3	426.1	482.3	320.3		359	383.7	480.6	346.3	370.3	454.2	450.7	365.5
-6.08333	477.3	321.3	367	369.2	517.1	430.3	479.4	340.8		349.5	388.3	491.3	353	375.2	449.7	448.4	383.2
-6.06667	476.2	328	355.8	385.5	512.7	437.8	479.1	336.6		353.4	385.4	474.6	338.3	371.6	455.1	451.5	364.9
-6.05	481.2	326.3	363.7	385.9	519	425.9	478.1	325.7		358.2	385.1	468	347.6	380.6	450.7	447.6	369.3
-6.03333	475	326	416.7	384.3	532.8	426.8	478.9	341.5		355.4	382.4	449.8	341.9	385.3	461.3	446.2	369.9
-6.01667	473.3	326	426.5	359	525.2	436.5	476.4	332.4		354.2	384.7	475.1	341.1	381.6	459.3	448.6	358.7
-6	479.1	324.3	381.1	357.3	520.7	425.7	483	323.4		354.9	384.1	480.2	341.9	374.2	458.2	444.6	369.3
-5.98333	478.1	317.1	365.4	369.1	543.4	408.7	476.9	326.5		343.7	385.7	443.7	343.7	371.4	457.2	448.4	370.8
-5.96667	478	327.4	345.2	382	520.6	418.5	482.2	328.7		347.4	387.7	444	338.8	379.7	456.2	450.6	364.1
-5.95	480.6	325.3	351.1	385.5	520.1	423.3	479.4	335		348.8	382.8	471.7	334.6	381.7	451.7	451	380.4
-5.93333	472.3	314.7	393.4	379	523.5	431.7	483.4	343.6		346.4	383.8	476.3	340.1	376.8	450.2	454.5	362.8
-5.91667	473.8	317.5	414.7	362.6	517.9	437.1	481.3	339.6		357.3	384	489.9	339.2	378.7	453.5	447.1	362.1
-5.9	470.5	329.2	399.4	365.5	505	424.9	475.9	339.9		356.2	382.3	470.1	343.3	372.9	469.5	452.2	360.3
-5.88333	478.7	325.6	397.3	366.8	501.5	421.5	482	335.7		357.8	386.4	470	345.6	379.9	458.7	443.4	376.5
-5.86667	475.5	325.1	386.7	372.2	512.3	408.1	483.7	334.2		364.9	383.5	438.9	344.2	382.6	456.4	449.1	370.9
-5.85	479.4	324.1	357.6	391	506.9	422.7	479.6	326.2		348.6	379.6	449.4	338.8	380.3	457.8	442.1	366.7
-5.83333	485.1	318.8	346.7	378	514.8	405.7	484.3	327.8		348.9	378.2	484.5	336.4	385.2	457.1	440.3	372.1
-5.81667	477.2	325.9	363.4	378.9	508.1	428.4	486.6	323.6		348.1	386.7	442.6	334.3	378.1	454.4	444.4	368.6
-5.8	473.6	321.7	365.6	375.5	506.3	406.4	487.8	321.4		341.1	385.2	446.4	343.6	384.9	448.9	445.8	367.2
-5.78333	476.5	314.2	353.8	365.6	519.9	412.1	486.2	321.9		352.3	382.4	468.5	333.6	379.8	453.3	442.5	359.2
-5.76667	483.9	320.1	360.9	361.6	513.1	404.2	480	321.1		354.6	393.3	475	340.9	375.7	449.6	449.9	370.3
-5.75	483.1	334.7	406.8	355.9	526.8	405.8	478.3	320.2		349.8	392.2	481.9	339.3	377.7	455.1	445.7	358.8
-5.73333	479.6	326.3	419.9	361.2	520.1	401.6	480.6	330.4		356	382.5	450	333.8	379.7	464.5	446.8	360.7
-5.71667	476.5	322.6	375	366.2	520.9	393.3	474.9	324		359.5	370.8	455.2	340.9	381.7	453.7	453.9	368.7
-5.7	482.1	320.3	391.4	383.3	519.3	408.6	484.5	322.3		350.4	378.8	490.5	340.1	382	454.8	456.6	358.6
-5.68333	476.8	322.6	383.3	383.9	528.5	385.6	482.3	325.5		355.2	389.3	458.9	337.4	377.7	454.1	441.4	367.6
-5.66667	484.8	328.1	365.7	370.2	508.2	408.4	491.6	330.3		362.8	390.8	458.1	340.5	377.1	460.1	448	363.6
-5.65	479.8	324.6	367.7	371.8	502.8	384.7	485.9	337		353.5	383.2	488.3	347.9	376.1	453.1	449.7	375.2
-5.63333	478.2	318.9	359.3	377.2	504.7	387.6	483.4	340.5		356.5	386.5	491.5	342.8	379.5	455.6	455.2	366.4
-5.61667	483.2	320.7	383.3	360.6	519.7	406.1	479.6	334.9		352.6	385.2	473.8	340.4	379.9	454.2	454.2	379.9
-5.6	478.7	325.3	398.6	377.4	517.4	400.8	477.4	331.5		348.6	378.1	436.8	340.1	379.1	452.3	443.6	358.4
-5.58333	482.4	327.6	424	387.4	539.5	408.8	477.9	317.2		358.5	391	443	338.3	382.5	446	444	368.4
-5.56667	481.2	328.8	398.1	368.9	518.3	395.1	484	320.5		349.4	393.6	467.2	339.8	380.3	438.2	446.6	373.2
-5.55	480.2	325.5	369.5	363.8	513.7	379.5	482.3	324.4		349.9	382.7	471.4	332.2	372.3	445.8	450.4	381.7
-5.53333	481.8	328.5	363	361.4	523.5	387.7	476.8	331		355.2	376.9	486.6	332	381.5	453.8	451.8	367.3
-5.51667	482.8	327.2	364.7	372.3	525.7	368.1	486.5	330.1		347.2	383	474.8	336.3	382.8	452.2	448.5	369.6
-5.5	486.4	327	367.6	388.5	524.2	357.6	479.1	338.7		355.7	392.5	476.7	338.6	376.9	446.8	451.5	363.9
-5.48333	489.5	322.7	371.4	377.7	515.4	366.6	481.6	331.2		363.7	390.3	466.6	343.3	381.3	452.2	445	370.9
-5.46667	484.7	326.4	389.2	386.6	519.4	383.4	483.7	346.6		357	386.6	446.2	343.9	379.3	461.5	453.6	365.8
-5.45	483.2	335.6	382.1	370.5	520.8	383.9	482.2	339.2		354.4	388.7	453.8	344.9	384.2	451.6	455.7	363.4
-5.43333	485.6	338.5	378.6	373.5	519.2	406.5	475.1	322.6		364.4	374.3	447.1	345.8	379.7	436.4	457.7	364.8
-5.41667	483.4	330.3	325.3	361	514.7	432.9	478.5	328.1		345	380.1	479.9	345.1	376.5	443.8	452.8	369.3
-5.4	483.9	334.4	331.1	360.1	513.2	426.1	479.8	337.5		353.7	379.1	478.3	339	377.8	453.5	452.1	377.7
-5.38333	479.7	322.8	332.7	364.3	517.4	420	481.7	346.6		351.4	377.3	486.7	330.3	374.5	455.7	446.8	368.4
-5.36667	480	323	325.2	375.3	514.5	408.8	477.6	327.1		344.1	374.4	470.5	330.9	382.7	449.9	445.2	368.1
-5.35	484.3	328.2	344.9	373.3	515.8	411.6	481.4	326.1		353.5	380.1	497.7	332.7	386.4	447.4	449.4	369.7
-5.33333	484.9	334.9	351.9	377.4	519.4	421.5	475.9	324.3		353.9	389.5	510.9	339	380.9	447.9	455.1	353.5
-5.31667	484.1	328.1	346.8	372.7	518.2	431.4	480.3	321.4		356.6	389.1	506.7	337.3	381.8	455.8	449.8	376.4
-5.3	485.7	328	325.4	365.2	518	420.7	479.2	334.9		359.5	388.1	488.8	350.9	375.9	450.8	449.1	363.1
-5.28333	485.1	330.6	325	368.5	516.3	433.1	478.2	337.6		357.3	383.7	476.9	342.3	388.1	446.6	446.4	364.7
-5.26667	488.5	325.8	322.4	377.6	520.4	429.5	478	332.8		358.8	402.1	451.9	338.6	381.1	449.5	456.4	364.1
-5.25	483.7	326.8	348	391.8	510.5	415.2	486.6	322.6		362.4	382.1	445.9	341.5	380.1	448.2	451.7	373.5
-5.23333	490	322.7	378.3	384.2	513.5	432.3	482.6	329.9		345.6	392.4	477.1	340.2	378.3	458.4	454.6	369.6
-5.21667	497.8	328.1	395.3	359.8	514.8	415.6	487.3	327.4		349.4	382.5	499.5	337.4	380.6	445.1	443.7	364.8
-5.2	483.3	332.3	412.3	363.4	518.4	431.5	482.7	334		353.4	367.4	481.8	337.1	421.6	438.1	443.1	377.1
-5.18333	484.8	332	367.9	370	533.6	428.5	484.7	331.4		352.2	369.6	443.1	337.9	435.8	453.6	443	358.9
-5.16667	480.6	329.4	342.1	384.7	521	454.9	474.6	338		358.9	375.1	428.3	336.3	413.5	464.3	447.3	360.7
-5.15	475.8	322.1	310	375.4	508.9	429	475.8	336.3		359	392.3	457.4	332.6	413.1	445.9	450.5	369.6
-5.13333	491.5	330.7	305.7	368.1	518.5	436.8	476.8	338.6		352.9	399	498.6	337.3	417.3	442.5	457.9	353.5
-5.11667	485.9	332.7	299.9	379.3	513.7	435.2	479.6	338.9		357.3	379.1	488.6	341.4	410.1	459.4	460.6	367.8
-5.1	482.5	331.2	305.2	374.7	521.7	441.1	476.5	329.5		364.8	372.1	476.8	346.2	414.3	460.8	511.1	356.7
-5.08333	489	329.3	326.6	381	517.6	435	491.6	326.5		353.7	381.5	469.2	343.4	416.6	453.2	466.9	365.6
-5.06667	482.9	364.5	340.8	367.2	526.6	422	489.4	326.1		360.9	388.9	460.4	344.8	418.7	444.4	470.4	359.9
-5.05	489	331.2	313.3	359.2	525.2	430.6	489	338.1		351.5	389	467.8	349.3	396.5	444.9	462.3	366.9
-5.03333	476	325	294	378.1	517.2	424	488.1	344.1		350.2	385.5	476.6	341.3	391.7	454.5	449.9	373
-5.01667	485.5	327.6	296.6	381.5	518.8	436.1	490.6	325.9		355.2	354.8	492.5	343.6	391.1	452.3	450	360.9
-5
-4.98333
-4.96667
-4.95
-4.93333
-4.91667
-4.9
-4.88333
-4.86667
-4.85
-4.83333
-4.81667
-4.8
-4.78333
-4.76667
-4.75
-4.73333
-4.71667
-4.7
-4.68333
-4.66667
-4.65
-4.63333
-4.61667
-4.6
-4.58333
-4.56667
-4.55
-4.53333
-4.51667
-4.5
-4.48333
-4.46667
-4.45
-4.43333
-4.41667
-4.4
-4.38333
-4.36667
-4.35
-4.33333
-4.31667
-4.3
-4.28333
-4.26667
-4.25
-4.23333
-4.21667
-4.2
-4.18333
-4.16667
-4.15
-4.13333
-4.11667
-4.1
-4.08333
-4.06667
-4.05
-4.03333
-4.01667
-4
-3.98333
-3.96667
-3.95
-3.93333
-3.91667
-3.9
-3.88333
-3.86667
-3.85
-3.83333
-3.81667
-3.8
-3.78333
-3.76667
-3.75
-3.73333
-3.71667
-3.7
-3.68333
-3.66667
-3.65
-3.63333
-3.61667
-3.6
-3.58333
-3.56667
-3.55
-3.53333
-3.51667
-3.5
-3.48333
-3.46667
-3.45
-3.43333
-3.41667
-3.4
-3.38333
-3.36667
-3.35
-3.33333
-3.31667
-3.3
-3.28333
-3.26667
-3.25
-3.23333
-3.21667
-3.2
-3.18333
-3.16667
-3.15
-3.13333
-3.11667
-3.1
-3.08333
-3.06667
-3.05
-3.03333
-3.01667
-3
-2.98333
-2.96667
-2.95
-2.93333
-2.91667
-2.9
-2.88333
-2.86667
-2.85
-2.83333
-2.81667
-2.8
-2.78333
-2.76667
-2.75
-2.73333
-2.71667
-2.7
-2.68333
-2.66667
-2.65
-2.63333
-2.61667
-2.6
-2.58333
-2.56667
-2.55
-2.53333
-2.51667
-2.5
-2.48333
-2.46667
-2.45
-2.43333
-2.41667
-2.4
-2.38333
-2.36667
-2.35
-2.33333
-2.31667
-2.3
-2.28333
-2.26667
-2.25
-2.23333
-2.21667
-2.2
-2.18333
-2.16667
-2.15
-2.13333
-2.11667
-2.1
-2.08333
-2.06667
-2.05
-2.03333
-2.01667
-2
-1.98333
-1.96667
-1.95
-1.93333
-1.91667
-1.9
-1.88333
-1.86667
-1.85
-1.83333
-1.81667
-1.8
-1.78333
-1.76667
-1.75
-1.73333
-1.71667
-1.7
-1.68333
-1.66667
-1.65
-1.63333
-1.61667
-1.6
-1.58333
-1.56667
-1.55
-1.53333
-1.51667
-1.5
-1.48333
-1.46667
-1.45
-1.43333
-1.41667
-1.4
-1.38333
-1.36667
-1.35
-1.33333
-1.31667
-1.3
-1.28333
-1.26667
-1.25
-1.23333
-1.21667
-1.2
-1.18333
-1.16667
-1.15
-1.13333
-1.11667
-1.1
-1.08333
-1.06667
-1.05
-1.03333
-1.01667
-1
-0.983333
-0.966667
-0.95
-0.933333
-0.916667
-0.9
-0.883333
-0.866667
-0.85
-0.833333
-0.816667
-0.8
-0.783333
-0.766667
-0.75
-0.733333
-0.716667
-0.7
-0.683333
-0.666667
-0.65
-0.633333
-0.616667
-0.6
-0.583333
-0.566667
-0.55
-0.533333
-0.516667
-0.5
-0.483333
-0.466667
-0.45
-0.433333
-0.416667
-0.4
-0.383333
-0.366667
-0.35
-0.333333
-0.316667
-0.3
-0.283333
-0.266667
-0.25
-0.233333
-0.216667
-0.2
-0.183333
-0.166667
-0.15
-0.133333
-0.116667
-0.1
-0.0833333
-0.0666667
-0.05
-0.0333333
-0.0166667
0	469.5	275.2	290.9	367.2	526.7	319.3	486.6	296.6		304.9	329.9	360.6	312.8	302.8	333.6	423.2	246.9
0.0166667	463	253.4	283.2	348.9	521.8	307.8	480.9	275.3		293.7	336	343.7	317.3	280.5	278.6	411.8	239.2
0.0333333	468.2	251.3	290.8	341.2	515.9	320.9	479.3	269.9		288.8	318.7	381.1	301.5	282.7	300.6	404.2	217.4
0.05	462	251.9	288.4	364.4	509.9	303.7	467.8	268.3		295.9	322.4	410.4	316.6	277.8	295.8	410.1	227.4
0.0666667	452.5	247.7	273.4	358	504.8	292.7	474.9	265.4		287.3	315.1	396.2	303.1	274.5	310.7	416.9	218.4
0.0833333	451.2	251.4	286	354.5	498.9	260.1	467.2	271.3		278.4	317.6	369.2	309.9	274.1	309.2	423.9	218.1
0.1	452.8	246.7	279.9	340.2	505	259.1	461.8	276.8		286.7	311	344.8	286.6	279.2	311.6	413.6	229.2
0.116667	453.8	248.7	305.1	316.7	493.8	257.3	463.7	283		276.6	309.3	347.6	296.5	272.1	311.1	415.7	230.8
0.133333	446.2	249.8	286.9	326.5	493.1	244.1	466.6	283		279.5	296.9	354	284.8	267.7	280.7	405.6	221.5
0.15	447.8	250.8	290.4	315.7	495.6	257	456.6	281.3		275.6	299.6	345.4	291.9	264.5	287	400.8	228
0.166667	449.7	247.5	278	322.9	487.3	257	462.1	281.9		282	296.5	373.6	288.5	260.6	324.2	408.7	217.6
0.183333	442.2	244.5	294.4	338.5	481	287.3	456.8	293.2		282.9	291.7	344.5	296.7	256.6	311.9	402.9	224.9
0.2	450.7	250.1	288.9	336.3	476.7	311.2	454.4	295.6		271.7	290.2	344.9	284.9	255.2	324.1	412.5	223.3
0.216667	438	246.6	295.9	324.8	469.2	325.7	448	290.8		282.3	282.2	329.4	294.5	256.8	305	408.6	230.8
0.233333	436.3	244.3	283.9	312	457.8	336.3	442.8	295.3		280.3	282.9	319.5	293.2	251.8	307.6	413.3	220.6
0.25	458.5	255.3	290	323.2	455.4	343.8	439.5	281.2		285.2	270	351.1	287	250.2	327	414.8	220.9
0.266667	458.9	247.3	328.1	318.7	451.6	353.5	439.9	280.2		278.1	287.3	361.4	293	252.6	295	414.1	218.4
0.283333	459	243.6	355.7	308.6	452.8	346.1	438.3	284.3		274.6	274.9	386.1	290.4	253.8	276.8	397.6	230.2
0.3	450.4	241.3	343	306.3	459.9	365.9	439.8	277.1		264.6	270.7	373	282.3	242.7	310.7	396.2	217.9
0.316667	436.2	241	320.5	286.2	446.2	330.5	436.5	288.3		272.7	266.6	362.6	288.1	242.1	291.9	400.4	229.2
0.333333	406.6	239.3	304.5	295.5	448.6	323.2	429.2	292.4		273	271.3	338.7	281.1	246.3	292	375	227.3
0.35	400.9	245.1	288.5	300.3	447.2	298.8	426.4	290.3		260	258.9	317.3	280.1	239.1	314.5	388.8	223.6
0.366667	393.2	241.6	280.3	286.2	448.8	295.5	437.3	294.4		263.5	263.3	319.6	267.9	245.9	342.6	370	221.3
0.383333	391.3	241.1	268.8	286.9	445.5	264.8	424.1	289.7		257.9	263	301.8	265.4	233.9	339.5	377.8	227.1
0.4	389.3	247.1	265.5	300	439.9	259.8	423.1	290.8		259.7	250	319.3	268.5	231.4	290.6	382.3	227
0.416667	332.8	241	280.6	288.8	432.2	255.6	427.3	286.7		257.4	255.2	365.7	262	231.1	266.7	381.2	233.9
0.433333	320	246.2	274	282.9	426	260.3	418.4	281.8		253.6	249	372.9	274.1	228.4	290.3	371.5	227.1
0.45	317.4	259	301.7	284.7	419.9	261.8	423.2	289.8		255.7	250.7	348.8	252.4	229.8	281.4	371.1	233.9
0.466667	317.9	266.8	293.3	297.1	413.1	279.3	418.7	280.5		252.5	248.4	342.9	271.1	227.4	256.8	362.4	219.3
0.483333	312.8	269.6	278.3	297	411.3	298.1	418.1	294.8		259	247.2	332.6	266.7	227.9	289	353.4	229.4
0.5	310.4	244	285	288.4	421.4	321.4	417.1	288.9		259	253.9	307	259.2	233.2	261.3	349.6	219.5
0.516667	318.7	249.2	277.2	274.2	432.3	328	417.9	283.8		256.4	248.8	305.3	258.2	237.3	287	337.8	217.3
0.533333	316.4	237.8	296.9	258.5	423.4	346.2	421.4	280.5		254.3	264.5	302.4	258.9	228.4	266.2	333.7	227.4
0.55	314.3	236.2	297.9	265	422.2	348.6	415	300.8		247.1	259.7	304.7	261.6	228.1	272.1	348.7	226.2
0.566667	315.8	247.3	289.3	270.2	423.8	344.6	415.9	323.5		253.1	261.7	337.8	272.3	230.6	262.5	347.2	213.9
0.583333	318.6	247.9	279.5	262.2	415.3	338	415.1	302.3		255.6	250.7	427.9	261.7	229.2	264.7	337.5	220.9
0.6	316.3	250.6	274.7	256	409.9	338.9	411.6	289.1		250.8	257.9	415.9	268	224.7	269.3	343.1	219.3
0.616667	318.6	251.8	266.3	262	410	328.6	414.5	285.6		253.6	246.7	386.6	251.6	221.5	279.4	343	230.3
0.633333	316.4	240.7	286.8	264.6	394.4	282.3	425.3	296.3		248.8	242.6	369.7	258.9	225.4	273	358.6	228.3
0.65	322.1	240.1	329.3	256.3	397.5	268.2	416.4	297.8		249	236	331.9	250.3	222.5	253.1	360.7	227.2
0.666667	311.6	246.9	304.8	245.7	401.4	258.5	415.2	304		250.7	233.4	299.1	248.3	220.3	288.5	354.9	228.8
0.683333	309.4	240.9	325.7	246	388.9	246	407.2	297.1		245.8	227.9	303.3	250.6	216.6	259.5	331.6	227.2
0.7	311.6	236.7	303.5	253.8	383.8	249.5	408.8	281.4		249.4	221.9	290.1	244.9	221.3	280.7	338	233.1
0.716667	303.3	245.6	300.5	263.5	383.1	232.6	402.1	291.4		253.4	223.7	277	258.8	226.2	272.3	325.9	214
0.733333	307.4	239.9	287.1	248.4	376.1	229.5	408.9	286.7		250.5	213.6	283.9	254.7	217.4	259.9	327.7	218.3
0.75	306.2	238.3	287	264.5	379.5	234.3	406.4	310.3		252.7	220.9	318.6	263.6	222.2	286.8	334	222.4
0.766667	314.7	240.6	287	264.9	382.5	232.3	405.2	294.5		251.2	218.4	320.7	256.2	223.8	276.6	339.2	217.7
0.783333	312.4	240.1	281.8	258.9	379.5	233.8	400.7	286.3		251.9	224.1	308.9	262.1	233.5	261.4	330.4	232.7
0.8	306.9	234.8	317.4	273.7	380.8	249.5	401.8	292.1		248.5	217.1	304.7	256	233.1	285.3	321.4	224.3
0.816667	307.8	230.7	296.3	263.6	373.2	278.5	406.3	292.9		254.1	227.4	313.6	256.9	223.5	253.9	323.6	208.5
0.833333	308	240.5	294.3	252.7	358.3	304.9	407.8	290.4		254.9	227.1	285.4	270	227.4	279.9	324	216.7
0.85	309.7	236.6	274.2	239.1	362.4	311	403.6	287.5		250.7	227.9	283.3	262.2	227.1	270.5	310.2	214.4
0.866667	310	233.5	274	244.2	362.9	324.8	395.3	287.9		245.8	219.3	298.6	255.1	221	270.1	299.6	214
0.883333	313.5	242.6	278.3	255.3	353.5	331.9	394.2	299.2		246	233.7	273.9	261.9	219.3	278.7	296.5	220.9
0.9	315.7	241.2	282.4	247.3	353.9	316.4	404.4	318.9		252	228.8	290.4	260.3	216.4	279.8	297.8	215.8
0.916667	316	232.4	297.6	240.1	350.5	321.2	399.7	302.6		249.4	235	314.3	266.1	220.4	280	298.8	214.2
0.933333	311.7	239	279.8	238.3	354.4	322.8	401.7	290.8		255.1	220.3	348.6	251.3	223.5	263.6	301.6	227.9
0.95	325.8	241.6	300.7	240.6	352.3	309.1	399.4	296.2		256.7	229.6	342	262.3	218.7	289.9	296.8	228
0.966667	310.4	246.3	305.3	241	362.4	315.1	398.2	296		243.1	219.6	344.6	251.7	225	260.6	304.7	226.3
0.983333	304.9	249.5	296.4	228	354.3	296.9	396.3	292.5		238.7	221.7	307.8	266.7	225.9	268.7	307.6	218.3
1	309.3	246.5	285.7	217.6	355.8	270.2	386.5	301.6		251.1	236.7	320.9	269.5	213.9	271.6	290.6	225.8
1.01667	309	242.6	292	217.9	353.4	262.2	392.1	293.3		246.7	217.1	315.8	262.2	220	254.6	282.3	213.9
1.03333	312.5	238.6	292	224	359.1	237.8	383.4	293		238.3	224.8	317.7	278.4	215.7	273.1	298.5	222.6
1.05	308.6	242.4	266.9	223.1	358.1	239.7	388.2	287.8		249.3	211.1	314.5	263.4	222	260	303.3	216
1.06667	308.1	239.5	266.1	242	349.4	223.5	386.3	297.5		242.1	210.2	280.3	267.4	217.7	260	293.5	220.3
1.08333	311.5	247.7	260.8	244.6	346.5	218.7	393	288.4		232.5	210.9	284.4	254.1	219.7	280.8	293.1	226.1
1.1	309.3	241.9	255.8	239.8	347.8	231.1	386.9	297.6		231.2	212.7	291.8	267.8	216.5	260.2	295.6	223.4
1.11667	313.4	244.6	254.2	220.1	341.1	240.5	386.1	296.2		233.6	210.4	306.7	260.2	223	297.2	288.2	235.2
1.13333	307	244.1	265.3	218.3	335.8	261.7	386.9	291.7		227.9	214.4	323.4	262.6	215.2	256.4	290.6	223.8
1.15	313.1	245.7	284.1	213.7	334.2	278.4	380.9	303.2		228.9	208	303.2	261.2	211.6	278.5	292.7	218.8
1.16667	313	241.6	286.6	214	337.5	310.9	376.7	300.4		230.7	209.7	286.6	260.2	215.4	274.6	290.4	221.6
1.18333	313.9	242.8	286.9	220.9	331	311	383	300.9		226.6	216	293	251.4	206.4	262.8	287.5	224.5
1.2	312.3	248.2	293	206.3	331.9	330	383.9	286.3		228.7	209.9	263.6	255.4	204.3	275.9	289.7	215.4
1.21667	312.9	235.9	319.8	206.9	325.1	317.9	385.7	300.7		232.4	218.6	270	252.5	207.5	257	290	232.4
1.23333	310.4	238.6	295.8	215.6	331.9	319.7	380.8	287.1		227.7	214.6	263.9	256.4	212.3	265.6	288.3	226
1.25	305.7	238.9	291.6	212.5	329.4	302.7	374.9	301.7		227.1	217.5	309.8	260.4	200.8	274.6	292.4	213
1.26667	308.6	237.3	275.5	200.8	330.8	301.2	372.4	309.7		229.6	211.9	351.5	255.7	203.6	283.6	285.1	214.7
1.28333	307.2	244	275.1	198.4	336.2	292.4	372.9	294.4		228.2	219.8	332	269.8	208.3	296.9	285	214.1
1.3	309.6	239.7	300.9	202.4	330.8	290.3	368.7	310.5		234.1	208.7	333.7	258.7	212.4	260.7	292.8	207.1
1.31667	303	242.5	339	209	337.9	296.1	377.6	316.1		233.1	214.2	309.8	271.1	206.9	293.8	286.1	215.7
1.33333	303	245.5	301	247	333.7	279.6	370.2	317.7		229.6	205.4	291.8	269.3	204.4	255.9	288.6	212.5
1.35	311.6	245.1	302.7	270.4	332.2	280.8	374.3	306.7		229.9	209.4	285.9	264.7	215.3	269.8	282.9	210.3
1.36667	312	243.3	283.9	268.3	323.4	285.3	376.6	307		228.3	199.5	315.4	256.3	203.8	264.8	287.3	218.7
1.38333	305.9	247.4	285.7	234.3	337.8	272.9	373.5	300.9		224.6	206.9	304.7	256.9	206.6	259.8	274.1	211.2
1.4	310.3	244.5	297.2	209	329.3	284.2	368.7	303.6		221.5	200.1	280.7	268.2	203.5	282.5	275.7	224
1.41667	299.7	232.8	267.6	193.4	329.9	279.7	372.4	303.1		228.8	208.7	286.2	255.1	204.8	263	282.9	217.1
1.43333	270.6	243.4	296.5	193.1	323.9	286	371.2	297		223.8	200.3	306.8	249	199.8	271.7	288.2	220.5
1.45	258	237	313.4	204.2	330.9	290.3	373.6	306.5		224	207.8	284.5	247.3	200.8	272.8	293.2	207.1
1.46667	252.8	244.8	285.4	207.5	321.5	264.1	379.1	304.3		221.4	203.7	284.9	258.3	205.3	249.6	288.7	220
1.48333	246.9	250.2	281.6	204.5	319.3	256.2	370.4	306.6		227.1	210.9	272	240.7	201.6	273.3	276	212.2
1.5	247.9	249.2	285.4	198.9	319	238.7	377.8	296.6		230.5	205.8	277.2	241	204.5	255.7	275.1	209.4
1.51667	247.1	246.4	264.3	189.5	319.9	226	371.1	298.7		225.7	217.2	277	252.2	204.9	256	281.9	221.2
1.53333	260	250.4	266.6	202.9	316.5	217.4	376.2	311.1		229.4	205.8	278.7	238.2	208.5	282.8	286.3	221.9
1.55	294.6	245.7	267.8	211.6	319.5	204.1	373.4	298.9		218.7	214.6	266.9	260.5	200.3	250.1	291.2	225.4
1.56667	312.2	246	264.5	212	319.9	204.9	362.7	309.4		219.8	207.2	286	249.7	206.1	283.7	283.2	215.5
1.58333	325	244.3	305.6	208.5	322.6	214.5	365.6	296.1		220	209.6	348.3	254.3	207.7	271	284.8	209.9
1.6	322.4	239.7	333.6	200.3	329.9	210.6	380.6	295.1		221.7	205.6	309.1	267.9	199.3	278.8	272.9	210
1.61667	322.1	246.9	344.3	218.2	323.1	204	377.5	314.9		215	198.2	314.2	259.3	203.4	273.8	272.1	217.8
1.63333	312.5	250.4	338.9	242.2	323.9	236	372.7	297.7		212.4	203.2	290.7	256.5	211.7	263.6	272.9	213.6
1.65	312.9	242.3	301.8	236	314.5	264.5	373	309.2		213.8	194.4	291	263	208.5	263.9	284.2	214
1.66667	319	245.5	297.6	229.1	322.7	277	367.8	289.1		217.4	198.4	283.2	256.1	210.7	246.7	278	207.1
1.68333	320.7	247.7	273.7	207.4	329	307.3	368.8	299.4		214.5	193.7	307.2	257.7	211	274.6	274.5	207
1.7	343.4	242.8	283.5	193.2	315.2	307.9	376.8	310.3		214.1	200	312.2	246.7	207.5	273.2	268.9	210.5
1.71667	363.8	247.3	282.2	193.9	302.9	304.5	381.3	306.6		213.1	201.7	304.2	245.2	206.2	265.2	270.7	201.4
1.73333	352.7	248.8	273.4	198.3	305.6	302.3	372.4	300.9		215.6	200.2	281.6	251.1	205.2	269.4	267.5	209.7
1.75	360.7	247.2	267	195.4	305.9	282.2	378.1	307		211.6	200	285.4	249.3	206.8	253.5	259.3	210
1.76667	356.6	247.9	286.9	201.1	305.1	260.4	381.5	297.5		218.9	202.6	271.2	256	199.2	284.2	259	214.3
1.78333	369.1	247.1	325	207.9	311.1	250.5	373.3	310		212.9	202.1	297.8	253.4	207.7	254.6	259.9	216.6
1.8	359.5	241.8	350.9	198.5	314.5	221.5	371.3	313.5		214.7	202.9	272	256.5	208	268.8	268.6	214.4
1.81667	359.9	248.9	324.2	194.6	307.1	216.7	369.3	304.4		219.3	207.3	278.9	258.7	199.3	269	261.2	203.7
1.83333	361.7	245.5	303.3	194.9	311.3	211.8	367.3	304.1		221.6	197.5	266.9	263.3	199	262.9	261	207.4
1.85	362	254.6	297	201.9	314.5	195.5	372.2	298.8		214.2	202.3	286.9	254.4	202.5	278.6	262.7	207.1
1.86667	357.7	250.6	305.6	224.5	308.9	202.9	368.6	305.9		220.1	194.3	312.9	269.6	197.7	260.8	265.6	207
1.88333	359.7	250.1	292.1	227.5	307.3	203.8	366.3	309.4		225.2	194	343.3	244	201.4	286	259	213.9
1.9	363.4	255.2	281.6	215	303.6	197.9	366	308.2		214.7	192.3	321.4	261.3	206.2	250.6	265.9	207.1
1.91667	363.9	247.2	275	208.1	305.7	217.9	362.5	304.6		213.2	193.8	314.1	254.1	200.8	274.3	256.5	217.4
1.93333	358.8	245.3	266.4	194.2	305.1	244.8	361.2	312.7		221.7	186.2	288.1	249.7	198.4	250.7	258.7	213.6
1.95	352.1	246.8	279	200.9	309.3	260.5	363.6	308.6		222.8	186.9	273.3	259.5	205.8	278.6	265.9	215.7
1.96667	355.5	241.8	272.1	214.8	312.5	278.2	365.7	315		223.8	193.9	292.1	239.2	201.7	258.2	260.8	203
1.98333	328.3	244.6	263.4	246.1	310.3	282.4	372.9	307.2		223.1	188.8	299.8	254.6	203.7	284.8	266.2	208.2
2	309.9	248.4	300.2	252.9	301.4	280.3	368.7	307		216.1	195.9	295.6	246.3	204.8	261.6	259.1	205.4
2.01667	299.6	249.8	336.3	231.4	303.6	288.7	374.1	307		217.7	191.7	269.1	252.1	203.2	262	261.6	203.3
2.03333	291.3	249.1	329.1	211.2	296.2	277.7	369.7	310.5		217.1	198.9	299.3	245.1	205.6	270.6	256.8	203.9
2.05	296.2	255.1	307.4	192	296.9	273.6	370	305.7		212.7	189.5	284.3	257.1	212	254.5	269.9	206.6
2.06667	286.5	248.1	281.1	200.6	302.2	270.5	365.7	315.5		217.3	199.4	297	243.2	205.1	278.3	251	216.5
2.08333	308.6	248.9	276.7	199.2	302	261.4	366	315.9		211	187.8	293.5	252.5	199.8	268.5	241.5	211.7
2.1	335.7	244.7	287.3	193.8	308.1	275.8	353.9	314.3		224	193.2	295.7	252.9	201.7	262	257.5	215.4
2.11667	362.8	246.7	271.5	206.1	299.4	263	360	314		214.5	192.2	301.1	246.9	202.8	273.2	252.7	210.7
2.13333	369	250.4	274.5	200	299	264.7	368.7	308		208.9	189.4	313.1	256.5	192.6	260.1	257.3	207.5
2.15	375.1	257.8	272.3	194.8	297.3	271	362.9	314		210.7	187.3	280.2	245.7	205.1	285.9	264.8	204.5
2.16667	363.8	258	277.2	185.5	294.4	262.4	368.2	318.3		215.3	181	277.4	258.9	204.1	264.4	275.4	208.4
2.18333	362.2	252.8	293.5	197.2	301.8	272.4	364.6	323.2		209.9	183.6	265	244.3	210.9	262.3	259.5	204.6
2.2	361.2	245.2	293.1	201.3	309.8	262.5	362.3	323.9		210	177	271.9	243.2	210.1	284.5	269.4	216.2
2.21667	361.9	245.9	266.2	189.8	310	260.3	363.8	311		209.1	187.4	295.3	248.2	204	258.1	258.7	211.7
2.23333	359.4	245.1	266.9	196	301.3	281.7	367.4	311		209	176.7	314.1	236.8	210	293.5	252.9	208.5
2.25	372	250.2	260.9	212.4	309.7	280.2	365.3	318.8		220.2	176.1	278.6	252.5	208.3	259.3	263.4	209.8
2.26667	365.1	256.9	256.7	225	307.4	285.2	362.5	320.7		216.6	179.5	275.5	240	208.9	278.1	259.6	210.8
2.28333	371.1	252.7	250.9	228.5	307.9	289.4	369	308.9		211.8	182.5	262.1	241.7	212.4	277.1	256.5	206.7
2.3	363.2	253.8	259.6	222.9	307.1	283.9	376.8	309.8		218	182.9	273.3	247.2	207.7	266.6	251.7	213
2.31667	330.2	258.3	272.9	211.7	317.4	273.6	362.3	316.9		207.6	187.3	272.2	236.6	208.8	285.1	250.2	201.8
2.33333	312.7	249.4	312.8	196.4	312.7	246.3	368.1	304.9		209.7	185.3	305.7	249.1	201.2	259.9	256.9	203.7
2.35	306	252.5	330.3	194.3	309.5	237.4	368.9	317.1		212.6	191.1	286.1	237.8	207.1	298	263.9	212.6
2.36667	311.2	256.4	316.2	201	308.2	219.8	369.8	311		206	185.8	276.5	261.3	207	261.7	261.4	209.5
2.38333	298.1	252.6	293.5	192.3	307.2	219.1	374.3	319.6		211.2	191.2	260.5	248.1	201.8	294.8	261.9	211.7
2.4	290.2	252.9	274.9	204.2	300.1	206	384.4	319.1		207.6	196.2	266.1	266.2	208	270.8	265.4	205
2.41667	300.4	247.8	275	232.6	304.3	200.8	379.7	318.1		217.5	194.3	301.5	257.4	202.8	289.1	246	201.5
2.43333	338.1	259.2	294.9	226.9	310.1	213.9	373.9	321.5		209.3	183.7	288.1	260.5	203.8	267.4	241.7	210.6
2.45	358.8	251.2	290.7	211.4	306.6	207.1	371.4	324.5		206.4	188.3	268.1	260.1	201.4	296.5	236.8	208.3
2.46667	370.2	254.5	284.9	205	310.4	201	376.2	311.1		210.4	183.7	268.9	256.6	202.8	274.4	246.5	215.8
2.48333	327.7	253.2	266	204.1	304	209.6	385.5	321.4		207.5	189.1	260.3	254.3	201.2	272.3	251.3	213.4
2.5	310.7	259.9	268.6	193.6	298.8	234.2	384.2	311.5		212.2	185.6	250.5	250.6	201.9	279.8	255.4	203.5
2.51667	297.1	254.8	259.4	194.8	309.4	247	384.9	326.6		206.8	187.7	272.6	250.9	207.2	266.1	250.7	204.8
2.53333	297	251.5	274.6	192.4	320.3	269.5	382.4	318.3		211.3	181.9	272.1	247.5	194.1	298	255.3	208.4
2.55	305.6	254.5	276.7	206.8	327	294.1	385.5	321.5		205	188	286.7	254	203.5	256.5	252.4	205.5
2.56667	321.5	253.2	265.7	213	310.6	303.5	379	314.2		201.5	178.5	285.2	244.5	202.2	276	249.5	210.3
2.58333	352.2	252.2	266.8	200	308.3	319.5	379.9	324.4		207.1	188.4	291.1	250.1	196.8	264.8	240.4	206.6
2.6	371.9	258.1	273.9	192.2	307.2	319.9	377.4	322.3		212.2	177.7	265.1	243.1	202.2	300.4	243.5	211.3
2.61667	385	252.8	271.4	192	306.2	315.7	372.7	331.6		201.7	179.7	262.4	247.3	192.5	278.4	250.9	201.5
2.63333	382.4	253	277.1	207.6	304.3	297.8	369.5	326.8		202	180.8	268.1	246.2	206.8	294.5	239.7	206.3
2.65	379.5	252.1	273.6	200.2	304	285.9	372.5	319.2		207.2	187	274.9	246	203.5	281.1	245.2	206.9
2.66667	383.4	258.9	262.7	204.3	297.1	292.9	369.5	319		201.8	182.7	295.7	249.5	203.9	278.4	245	203.5
2.68333	375.3	255.5	264.7	193.7	303.1	277.4	371.7	320.7		210.6	178.6	276.1	247.3	197.9	278.1	240.7	209.1
2.7	381.1	254.2	254.6	187	302.1	287.4	370.2	325.3		207.5	171.2	270.8	247	198.9	295.3	236.6	207.3
2.71667	375.8	248.8	267.9	199.1	298.6	275.8	372.6	322.4		204.5	178.8	256.3	256.5	204.2	282.9	242.1	219.1
2.73333	366.5	261.1	287.9	215.4	309.3	272.5	371.2	315.1		211	168.6	301.9	244	198.8	307.2	256.7	215.6
2.75	323.7	251.5	307	228.9	306.4	274.7	365	331.4		198	174.1	260.5	258.7	205	272.4	248.3	209
2.76667	320.5	255.4	338.1	228.1	305.2	266.3	371.9	325.9		200.6	176.6	272.2	253.8	192	294.5	242	207.3
2.78333	314.9	255.9	341.5	212.5	299	270.4	375.4	322.5		200.1	189.1	271.2	237.5	202.4	309.6	242	208.8
2.8	311.5	258.6	307.3	198.2	306.8	241.5	375.9	329.9		201.7	183.8	257.2	256.1	196	285.7	255.8	202.9
2.81667	296.4	258.9	314.8	197.2	305.2	242.8	383.8	330.8		202.8	191.8	255.3	244.8	190.8	283.4	247.3	214.2
2.83333	310.7	254.7	299.4	201.3	297.3	215.3	377.9	341.4		198.7	179.9	255	257.1	198.8	286.5	238.4	214.9
2.85	343	260.1	279.2	194.1	297.9	220.2	374.5	338.5		207.6	190.4	300	248.4	187.7	281.7	244.1	206.3
2.86667	383.6	253.1	279	181.9	303.2	211.4	368	319.9		195	184	304.3	259.3	196.6	276.8	257	213
2.88333	387.4	260.8	285.1	198.4	292.6	211.9	369.7	330.4		205.4	184	300.6	255.6	187.4	290.8	246.6	203.5
2.9	395.7	261.8	289.3	208.4	304.2	209.4	370	325.7		207.6	181.4	281.9	263.7	192.2	277.1	244.4	212.6
2.91667	382.1	265.4	288.2	203.7	310.1	194.4	370	332		195	177.6	263	265.7	188.6	300.4	250.1	204.3
2.93333	387.2	257.3	279.4	191.9	317.8	206.2	376.9	325.9		204.5	176.2	252.6	264.2	190.7	282.8	244.8	204
2.95	380.1	254.4	264.4	200.6	310.2	219	367.5	319.1		199.7	174.3	242.6	264	193.5	306.3	245	208.3
2.96667	380	261.8	261.5	215.6	299.6	237.2	375.7	324.2		197.4	171.4	263.7	259.7	189.6	278.4	246.7	210.6
2.98333	378.3	261.1	260.2	223.7	302.5	265.6	369	336.1		201.4	171.9	267.4	271.2	195.1	291	249.6	211
3	379.8	262.7	275.6	215.3	301.2	274.6	362.1	327.4		202.8	173.7	265.3	255.5	195	285.8	249.9	204.9
3.01667	381.7	262.1	308.8	206.4	303.6	290.5	368.1	321		206.4	176.6	246.9	269.8	195	284.2	252.6	208.5
3.03333	385.4	262	321.1	200.9	297	294.4	372.3	322.7		206.1	176.9	266	253.5	190.7	278.8	246	213.2
3.05	379.9	268.1	296.8	207	303.9	303.6	365.1	332.5		197.4	181.3	291.1	275.6	193.6	291.9	252.1	213
3.06667	376.5	256.8	278.8	210.5	313.5	309.1	380.6	327.7		204.8	171.5	305.7	257.8	189.6	298	239.9	207
3.08333	334.6	257.8	276.4	207.5	314.8	277	380.1	333.2		201.5	179.7	299	264	193.4	304.9	244.3	205.3
3.1	323.7	264	256.2	198.4	321	277.9	390.4	323.5		199.3	171.3	272.2	269.2	180.9	289.4	247.5	217.1
3.11667	329.1	261.4	265.5	186	305.4	260.7	377.1	325.7		205.1	178.8	268.6	258.6	190.5	304.6	228.9	210.1
3.13333	315.2	264.5	261.6	194.6	300.7	280	376.1	334.6		202.4	174.7	241.3	269.3	186.6	275.6	240.2	206.6
3.15	307.2	264.1	273.2	208.8	296.6	250.6	389.9	332.4		201.2	181.9	245.4	293.3	192.1	308.8	245.2	213.9
3.16667	299.3	264	321.4	207.2	301.3	260.5	390	329.5		200.2	175.9	271.9	331.9	185.1	277.8	242.4	206.2
3.18333	312	261.4	328.8	197.5	314.9	250.6	373.6	329.1		202.6	185.5	280.6	366.6	194.5	303.1	232.5	218.1
3.2	340.5	256.7	303	194.5	300.3	264.8	373.1	325.5		199.5	184.2	312.1	322.8	184.6	286.6	231.2	205.9
3.21667	368.6	264.7	293.5	207	294.9	232.1	386.8	331.1		200.8	181.4	276.6	310.9	197	310.3	238.8	209.4
3.23333	390.6	265.8	270.6	218.2	294.1	230.3	376.6	344.9		199.2	173.3	278.7	272.1	179.7	285.8	238.1	203
3.25	398.7	253.9	270.1	207.7	309.6	210.2	380.4	338.9		200.8	179.1	267.7	273.7	187.7	291.2	238	206.5
3.26667	399.8	256.6	267.4	208	305.6	210.9	381.8	320		194.1	182.5	270.6	254.9	181	288.4	228.5	206.1
3.28333	366.3	259.5	266.2	189.8	294.7	205.8	376.8	333		191.4	175.1	299.5	256.7	180.1	283.7	238.4	208.6
3.3	336.6	255.6	265.2	181.3	301	205.1	381.3	320		195.4	186.3	287	242.3	183.5	309.9	240.7	210.7
3.31667	331.8	253.4	274.5	181.9	296.7	200.7	376.7	330.4		189.9	180	255.9	251.5	185.7	286.6	237.5	216.1
3.33333	327.6	259.1	257.6	205.3	296.1	194.9	386.5	330.9		202.1	183.5	262	258.9	186.8	309.4	231	207.4
3.35	315.8	264.2	270.9	218	302.1	198.4	376.6	316.3		196	177.9	267.2	262.4	192.2	295.2	226.7	208.8
3.36667	322.9	258	284	212.8	302	203.2	366.6	330.7		196	181.4	280.9	256.9	188.6	288.1	233.9	209
3.38333	348.1	263.2	276.2	208.7	315	224.7	379.9	337		205.5	180.2	287	263.9	184.6	303.6	226.2	209.9
3.4	393	267.3	283.8	194.3	307.2	258.7	382.6	329.2		195.6	181.8	270.6	249.3	191	288.4	233.8	209.1
3.41667	406	272.2	261.5	184.5	310.5	277.1	381.2	335.9		202.9	183.7	288.2	259.4	183.2	311.4	236.6	213.3
3.43333	404.3	266	269.7	200.5	298	289.1	380.2	332.5		206.4	175.3	309.6	238.3	189.1	280.8	236.9	211.3
3.45	397.1	265.1	260.4	198.3	304.9	294.2	380	339		202.6	178.5	274.5	251	184.7	301.7	232.7	212.8
3.46667	403.9	264.2	274.8	196.3	296.3	291.4	380	337.3		205.5	176.3	271.5	257.1	185.8	284.7	236.4	204.3
3.48333	406.6	265.8	278.4	195.2	302.1	280.7	367	342.2		199.9	176.9	252.9	245.8	185.1	294.5	226.5	214.4
3.5	397.4	260.8	263.4	215.8	300.3	276.6	377.4	330.8		198.3	170.9	259	260.7	191.9	274.2	239	207.1
3.51667	399.7	261	261.3	213.4	298.3	267.4	384.8	322.3		202.4	176.2	272.8	248.8	179	307.7	241.6	209.6
3.53333	389.6	268.8	271.4	200.9	295.4	271.4	386.7	337.6		197.7	170.8	292.9	256.8	186.8	295.9	236.8	208.2
3.55	390.8	263.8	259	190.6	304.6	261.5	378.3	332.8		196.2	175.3	280	247.5	187	290.8	236.1	217.5
3.56667	395.3	270	274.6	184.9	305.8	260.2	385.8	333		193.4	170.7	281.7	254	182.7	295.3	240.3	220.5
3.58333	411.5	271.7	299.2	198.8	311.2	255.7	377.3	330.4		189.6	174.4	281.1	242.8	183.8	285.5	247	215.7
3.6	393.8	269.4	302.5	199	314.5	258.6	379.6	330.1		193.4	169.7	257.7	255.1	182.2	304.1	235.8	206.5
3.61667	400.9	268.2	286.5	209.4	301.1	257.2	382.5	320.5		193.1	171.7	262.3	238.6	179.4	297.1	241.2	207.8
3.63333	376.8	265.4	285.2	216	299.3	270	387.3	331.3		197.3	169.4	268.1	248.5	181.7	311.7	237.6	205.4
3.65	347.6	270.2	266	238.5	299	260.5	386.2	334.5		201.4	166.5	286.2	248.9	183.7	323.2	232.8	210.2
3.66667	343.6	275.2	290.2	213.9	311.1	251.4	381.7	332.3		199.3	173.8	301.6	244.7	188.3	289.3	239.9	202.3
3.68333	336.2	270.7	286.6	198.4	307.6	229.4	398.4	334.6		203.4	180.9	274.3	245	185.4	302.9	241.7	214.1
3.7	324.8	264	264.5	182.5	305.3	229.9	394.6	340.1		193.5	174.9	270.6	249.3	185.9	284	239.4	207.1
3.71667	319.8	272.7	267.5	181.2	305	216.2	389.8	328.8		198.3	180.2	258	241.3	189.4	292.6	244.2	228.6
3.73333	327.8	264.3	266.2	197.5	295.5	213.4	385.6	332.4		199.8	175.7	252.8	254	183.9	304.2	244.9	218.6
3.75	354.8	267.5	253.1	209.2	299.4	209.6	392.9	330.3		198.2	187.2	257.3	236.7	185.7	301.4	240.7	212.9
3.76667	393	267.9	270.3	198.6	296.5	216	395.6	331.8		199.8	180.1	238.9	249.9	185.1	316.6	240.1	214.7
3.78333	414.6	261.9	307.2	193.8	300.4	204.8	389.9	351.9		200.8	185.2	265.8	232.7	191.1	299.7	228.8	229.7
3.8	424.5	266.3	339.9	188.8	299.2	217.1	391.7	350.3		202.7	180.7	272.9	249.4	178	303.4	233.3	213.5
3.81667	428.4	270.4	306.3	203.7	308.5	234.3	391.1	345.7		204.7	177.5	304.1	252.5	186.7	307.4	233	207
3.83333	414.2	277	293.1	204.8	314.1	254.8	387.6	338.2		207.6	175.3	315.3	254.7	181.8	292.4	233	209.6
3.85	413.2	264.9	280.9	193.7	308.8	276.6	387.9	329.4		201	172.5	283.9	252.4	184.6	318.9	236.5	214.3
3.86667	410.4	271	267.2	206.1	309.8	288.2	392.3	346.3		201	173.8	280.5	258.1	182.3	303.4	235.2	212.3
3.88333	410.1	280.5	266.2	206.9	302.2	294.1	389.4	331.3		204.5	181.8	311.2	245.9	188.1	311.7	233.3	216.4
3.9	407.4	274	249.6	201.8	298.6	288.8	389.1	338.8		198	172.5	287.7	248.6	182.8	329.3	233	210.9
3.91667	396.7	279.2	257.7	194.2	305.9	273.4	390.7	339.8		205.8	176.4	260.3	240.3	190.8	306.6	237.3	224
3.93333	397	273	271.8	188	302.5	280	385.8	331.3		196.5	176.1	255.7	241.8	176.3	313.9	237	224.9
3.95	407.4	271.3	290.1	210.5	308.1	274.8	386	349.2		202.1	182.1	251.6	242.8	189	320.9	240.5	223.3
3.96667	369	265.8	335	214.4	308	275	389.5	341.2		200.3	177.7	232.9	244.7	189.9	291.6	240.1	218.7
3.98333	351.7	272	307.3	208.9	307.1	251.7	396	348.8		205.2	180.6	237.3	244.1	191.7	323.1	252.1	218.1
4	346.8	278.1	295.8	201.2	305.3	234.7	394.3	343.8		207.6	180.1	233.6	242.3	187.6	312.6	250.3	218
4.01667	347	274.5	277.8	205.4	302.4	210.7	387.1	334.5		205.4	181.7	226.2	252.4	188.8	330.2	241.4	214.5
4.03333	352.2	274.9	267.6	212.8	302.9	212.7	393.9	346.2		211.1	189.7	235.5	249.5	183.8	335.2	240.2	210.6
4.05	339.1	277.6	266.2	204.3	303.9	198.3	399.2	348.6		198	182.2	248	255.1	186.6	316	248.7	218.7
4.06667	369.3	277.9	261.7	196.3	310	205	396.4	341.2		205.8	181.2	274.8	241.2	180.9	310.8	251.5	219.8
4.08333	392.4	271.1	267.1	197.8	320.4	220.6	394.3	341		206.8	183.6	283.6	251.4	182.7	322.2	256.3	213.1
4.1	414.5	279.7	287.8	209.2	318.3	234.8	401	347.9		204.4	178.8	271	250.2	181.2	303.9	243.1	225.1
4.11667	425.3	277.4	278.5	196.9	307.7	262.6	399.3	334.2		204.9	181.6	277.9	245.7	187.1	320.4	242.1	217.2
4.13333	414.7	275.3	282.4	213.4	312.3	278.5	395.6	342.7		207.6	174.2	303.1	246.8	187	346	249.8	217.9
4.15	424.5	268.1	288.1	222.6	312.9	296.2	403.7	345.5		208.8	171.4	306.5	238.3	193.1	308	243.1	218
4.16667	418.9	274.1	293.2	212.6	307.8	289.1	396.2	346.8		196	172.8	300.9	255.3	183.5	335.7	246.5	216.3
4.18333	419.8	272.3	294.8	207.8	314.9	303.7	397.8	340.9		200.3	173	280.2	241.2	186.5	313.5	246.9	221.2
4.2	417.4	272	288	205.4	310.7	284.9	400.6	337.5		201.8	173	250.6	254	183.5	310.5	245.3	219.3
4.21667	415.3	272	267.3	218	294.5	291	394	350		203.7	173	253.5	247.9	183.1	317.8	242.4	222.5
4.23333	420.2	275.5	269.6	200.7	306.2	270.3	402.6	347.4		197.9	171.3	274.7	241.9	185.6	308.5	240.3	216.9
4.25	380.3	272.5	252.7	194.9	325.9	265.7	401.2	343.6		206.6	178.8	251.6	254.1	184.2	311.5	244.4	225.6
4.26667	360.1	279	257.3	192.4	314.7	251.3	399.3	343.1		207.8	178.1	265.8	249.7	186.6	323.2	247.5	218.2
4.28333	353.1	283.3	250.1	200.7	313.2	253.6	402.5	344.7		204.5	193.6	281.5	243	180.9	318.7	239.3	218.9
4.3	344.4	273.5	262.1	201.8	313	247	396	352.7		209.3	192.2	281.9	247.3	178.4	316.4	249.4	218.1
4.31667	340.6	272.2	275	221.9	303.5	256.5	390.8	344.3		205.6	195.5	277.7	247.9	178.1	336.8	244.7	216.3
4.33333	347	283.3	310.4	222.8	305.7	261.3	398.8	348.4		206.8	189.9	263.3	245.4	178	305	251.9	216
4.35	373.8	271.8	349.8	228.2	315.5	266.2	405.9	338.5		213	189.1	246.6	252.8	171.9	316.2	250.3	215.1
4.36667	453.5	273.7	350.8	218.5	312.5	272.9	394.7	350.2		202.6	190.7	270.3	240	178	335.9	240.5	228
4.38333	441.8	284.3	303.4	209.4	313.8	279	401.9	336.2		207.3	185.8	287.3	244.3	174.5	328.2	241.8	233.2
4.4	438.5	279.7	286.6	198.7	313.1	305.8	402.8	340.3		207	195.5	307.8	238.9	175.8	334.1	247.2	216.6
4.41667	430.3	280.8	274.8	192.9	300.9	291.3	401.3	347		207	180.4	292.4	251.1	173.4	321	242.7	223.9
4.43333	378.2	280.1	263.7	203.4	313.1	281.5	401.9	355.6		204.4	180	273	238	180.8	305.4	248.1	213.6
4.45	358.1	292.1	262.2	199.6	309.6	257.7	395.9	332.6		199.7	187.8	270.4	243.2	178.4	324.9	257.5	221.7
4.46667	345.9	285.1	269.8	203.4	318.6	242.4	396.9	347.6		206.9	188	252.8	249.1	186.7	317.2	245	209.9
4.48333	344.3	282.4	282.1	211.7	314.6	237.7	390.9	340.2		200.9	188.9	291	246.4	183.5	332.6	249.3	220.4
4.5	332.8	289	287.2	231	309.8	215.5	398.8	349.5		206.2	188.1	277.2	259.9	183.9	347.6	255.1	214.9
4.51667	357.2	280.3	264.5	231	313.4	212.5	399.8	341.3		209.5	190.6	264.9	245.3	184.9	326.3	260.2	223.6
4.53333	398.5	283.5	265.8	215.4	320	204.3	398.2	337.6		213.4	186.6	249.4	252	181.5	333	262.6	216.2
4.55	421.4	285.7	264.2	198.6	312.2	216.1	397.2	333.6		215.6	193.9	249.1	250.3	184.5	326.1	259.5	224.7
4.56667	434	287.7	258	189.4	318.1	211.7	397	342.6		213.4	187.9	277.5	240.5	178	304.4	263.4	220.6
4.58333	430.5	289.7	261.5	208.1	317.1	239.6	391	338.6		220.8	179.3	303	260.8	184.1	339.5	247.5	222.7
4.6	431.8	292.6	254.1	214.9	318.7	252.1	394.5	344.1		210.6	180.8	285.7	239.4	178.8	341.7	248.8	221.2
4.61667	459.6	293.8	260.9	212.4	315.5	276.2	400.1	341.4		211.8	174.9	280.8	247.7	176.4	319.5	254.2	226.2
4.63333	472.9	290.5	296.4	211.2	312.5	280.4	413.9	348.8		206.8	179.3	273.2	235.9	180.4	333.8	253.2	228.6
4.65	460.9	288.3	276.2	222.3	312.1	299.9	407.1	335.1		209.6	175.6	279.1	247.2	175.7	330.5	261.7	223.8
4.66667	437.6	299.3	285.5	219.4	313.7	288.8	405.3	335		207.3	181.1	260	245.3	179.4	316.2	260.2	223.1
4.68333	420.7	278.3	275.6	203.5	317.4	288.1	405	341.1		212.2	179.3	271.2	239.9	173	354.1	250.5	218.7
4.7	420.1	285.8	265.6	199.6	321.4	281.1	402.4	342.7		210.3	179.9	300.4	259	179.9	360.1	252.7	223.3
4.71667	427.8	292.9	287.6	194.8	322.8	268.9	402.1	339.5		210.9	186.9	302.7	249.5	171.3	327.2	248.6	219.6
4.73333	430.6	289.5	308.7	190.6	310	270.7	405.5	348.6		210.1	186.1	296	259.4	179.7	345.2	249	231.2
4.75	427.5	288.2	285.6	214.3	319.5	257.1	405.9	359.3		207.4	187.7	266.6	253.9	177.4	342.4	244.7	230.2
4.76667	374.3	294.1	271.2	221	319.1	263.1	406	344.3		219.2	183.6	261.8	259.2	177.9	321.3	257.9	222.2
4.78333	373.2	292.3	260.7	213.2	319	257	405.1	330.2		203.5	187.4	261.1	244.3	181.4	339.2	265.8	228.9
4.8	356.6	287.7	257.5	204.4	312.1	256.1	400.7	338.7		212.6	180.1	250.6	258.7	175	331.2	264.2	222.9
4.81667	344	288.8	295.1	198.9	308.6	274.2	407	327.7		212.1	175.7	251	246.9	178.5	330.2	264.9	226.5
4.83333	344.9	293.3	324.4	188.6	313.3	269.7	412.2	337.5		212	183.7	288.2	250.4	175.5	337.8	261.5	223.5
4.85	367.5	286.1	319.7	195.9	330.3	269.1	408.6	344.8		206.8	182.2	272.5	252.7	177.7	321.5	257.6	223.9
4.86667	393.9	284.3	288	219.3	323.1	280.3	408.9	341.5		212.2	192.4	268.6	248.6	182.3	333.2	257.1	220.5
4.88333	416.5	294.4	276.8	229.4	333.4	279.2	409	345.4		222.4	183.4	253.4	253.3	178.6	333.9	263.9	226.1
4.9	435.9	288.9	270.9	223.9	327.9	290.3	408.1	340.7		213.4	190.8	271.2	253.9	182.4	331.4	267.4	229.5
4.91667	436.9	289.8	260.6	211	314.1	285.7	412.3	338.4		220	192.7	279.7	250.5	179.5	342.3	265.3	223.9
4.93333	387.7	295.2	254	194.6	306.2	279	405.1	345.8		215.7	191.2	313.7	245.7	179.9	335.1	256.4	238.7
4.95	354.2	293.3	253.1	189.8	306.9	277.3	416.3	353.8		221.1	194.5	299.3	249.4	186.9	355.8	264.7	226.9
4.96667	347.1	292.2	253	189.1	311.3	279.6	409.1	329.8		215.8	188.9	287.8	249.1	181.8	344.7	262.4	233.9
4.98333	351.3	300.7	252.1	211.5	324	286	414.2	327.4		222.9	187.3	282.8	255.1	181.1	329.4	260.3	225.3
5	341.5	295.8	263.3	227.5	325.7	282.5	417.5	339.2		216.9	189.6	263.1	243.8	179.3	346.3	263.5	224.2
5.01667	371.3	287.3	256.1	233.1	326	274.3	406.7	335.6		219.6	186.5	259.6	255.2	179.9	327	266.5	221.4
5.03333	398.7	297.4	255.2	214.9	324.3	281.8	401.8	342		210.4	186.1	250.4	247.2	175.7	329.6	266.1	222.8
5.05	426.6	302.2	293.1	201.1	313.7	283.7	410.6	332.5		221.3	180.8	284.6	253.1	178.5	349.8	258.2	229.9
5.06667	434.7	293.4	287	204.5	315.7	273.6	413.5	345.9		211.5	181.8	297.9	240.9	177.2	334.4	262.4	223.9
5.08333	422	295.6	275.8	218.8	317.7	290.4	423.4	346		219.7	178.5	301.4	260.9	173.6	338.4	272.4	234.4
5.1	423.7	306.3	268.2	227.6	327.5	282.3	420.5	352.9		213.9	182.4	267.3	248	179.1	351.9	267.7	238.4
5.11667	443.9	301.7	271.5	215.8	330.5	276.8	423.5	349.5		214.9	185.5	286.1	259.2	171.2	339.9	272.3	235.5
5.13333	425.8	293.3	275.4	207.3	320.6	283.9	420.5	338.7		215.8	190.3	288.6	248.7	179.7	338.3	268.6	264.5
5.15	423.4	294.8	257.8	199.3	327.9	283.1	417.5	342.4		205.6	190.9	308.8	247.2	177.4	371.8	259.4	236.4
5.16667	432.6	293.2	253.6	199.9	321.1	272.6	418.8	340.3		218.1	206.6	271.8	237.5	177.9	346.9	269.4	230
5.18333	428.6	293	260	225.9	330.5	265.2	418.1	349.6		214.5	215.6	267.6	245.7	181.4	359.1	273.4	236.9
5.2	423.8	298.2	260	242.4	330.9	251.2	415.4	336.1		227	197.8	271.4	246	179.3	381.5	274.8	233.5
5.21667	429.2	298.9	263.5	227.4	324.1	229.4	423.7	349.8		220.1	198	303.9	240.8	187.7	369.8	271.5	232.2
5.23333	406.5	289.5	268.3	215.8	320.6	230.8	414.4	346.5		226.1	191.1	315.2	250.5	188	349.2	271.1	232
5.25	474.4	293.4	262.8	200.4	315.8	218	414.9	346.9		218.2	192.7	284.8	251.8	185.4	365.5	265	233.7
5.26667	468.9	297.4	285.5	185.4	329.8	219.7	419.3	341.8		219.8	184.3	272.9	259.8	179.9	344.3	258.9	243.5
5.28333	450.8	287.5	269.5	189.4	327.4	213.9	423.4	354.1		220.8	184	249.6	247	182.6	355.3	271.1	234.4
5.3	409.5	287.1	278.6	217.6	317.5	227.8	421.3	348.8		217.5	192.7	256	255.6	184.7	364.5	272.7	243.6
5.31667	358.9	302.6	283.3	242.2	326.6	215.9	420.2	342.9		222.3	183.4	256	255.1	180.6	340.7	274.7	236.2
5.33333	352.9	297.8	279.6	236.8	326.1	216.8	417.4	348.2		217.7	192.6	294.9	249.8	187	371.2	272.4	239.5
5.35	333.1	301.4	274.8	223.1	336.4	238.6	427.4	339.4		220.6	186	304.5	253.4	180.1	352	266	237.3
5.36667	325.2	299.3	255.1	207.5	318.8	248.5	428.8	344.2		218.3	198.1	299.7	243.5	186.1	352	267.7	230.1
5.38333	322.4	293.9	261.1	192.4	324.2	274	429.8	346.6		225	195.4	289.6	243.9	181.7	366.7	269.7	238.7
5.4	303.9	291.4	268.8	202.4	323.2	289.6	428.2	327.9		208.6	195.1	315.9	247.5	182.8	336.7	269.1	232.9
5.41667	310.9	301.4	292.3	222.8	331.7	302.9	421.1	333.2		224.5	202.8	295.2	241	185.6	363.8	275.1	235.6
5.43333	353.4	294.1	283.4	236.8	325.9	303	425.3	346.9		224.1	195.2	266.5	243.6	185.9	364.8	279.3	234.2
5.45	379.9	299.2	275.3	232.7	326.9	309.9	432.8	348.7		224	192.4	253.1	243.9	186.9	343.4	271.3	236.6
5.46667	386.9	306.8	267.3	232.1	335.6	303.1	425.2	347.2		219.7	192.1	269.4	250.9	184.4	374.2	275.4	234.4
5.48333	401.7	295.7	262.7	214.7	346.3	291.8	432.8	340.1		220.8	185.1	267.3	245.8	191.8	370.6	275.9	229.7
5.5	389.9	306.3	286.3	203.7	330.5	276.4	426.9	350.4		230.5	188.5	300.8	248.6	180.7	351.9	269.9	230.8
5.51667	380.5	313	303.3	196.2	327.5	273.5	430.4	341.4		219.7	190.7	314.8	256.7	186.2	358	279.5	235.3
5.53333	378.3	304.3	280.6	209	314.1	267.9	437	335		233.8	189.2	298.5	246.6	185.2	375.3	285.1	236.8
5.55	390.2	306.6	274	230.6	333	273.2	430.1	351.4		217.5	189.9	284.2	252.1	182.4	362.1	284.2	236.1
5.56667	387.4	307.8	268.8	231.8	320.9	273.9	434.3	353.7		223.1	185.7	272.8	242.5	185.5	353.4	274.5	243.8
5.58333	351.6	306.2	272.4	226.8	337.4	270.5	432.3	347		219.6	192	271.2	250.7	178.2	377.3	269.7	233.6
5.6	330.3	302.6	275.5	212.3	325.8	280.4	432	349.6		229.5	196.3	272.8	257.9	187.5	362.3	274.3	236.5
5.61667	330	302.9	278.5	210.3	326.8	285.2	440.7	352.5		211.8	204.7	272.1	246.7	182.7	350.8	276.6	234.3
5.63333	316.2	309.9	266.8	227.3	335.6	292.8	428.8	350.3		223.2	199.8	264.2	259.9	186.4	382.1	280.4	252.2
5.65	305.6	310	277.4	236.6	329.9	291.2	439.4	344.9		223	219.9	255.4	242.7	186.9	364.7	279.2	241.7
5.66667	322.4	303.9	273.6	230.9	340.4	296.2	430.4	346.7		226.5	209.6	294	259.4	182.7	351.1	270.4	242.8
5.68333	357.5	302.3	273.1	215.4	339.2	291.7	435.2	349.6		227.8	207.4	328.6	253.9	185.5	370.9	277.8	237.8
5.7	376.1	309	274.7	203.8	327.8	281.6	429.8	341.3		228	210.5	300.4	257.4	184.2	428.9	284	238
5.71667	379.5	315	276.7	205.7	319.3	285.4	431.7	343.6		226.3	204.9	295.7	251	190.1	474	284.9	241.5
5.73333	381.7	302.9	283.9	218.9	321.6	284.2	432	345.7		225.2	210.2	289.9	248.4	181.4	423	285.8	248
5.75	369.8	310.8	280.5	230.2	328.9	284	436.3	358.9		235.4	202.2	281.3	253.2	184.5	404.8	279.1	248
5.76667	373.4	305.8	263.6	227.4	332.4	288.3	439.5	336.5		225.5	203.8	258.6	236.6	190.1	414.5	282.5	247.1
5.78333	373.1	299.9	264.8	221	332.9	290.6	431.3	343		233.7	199.6	270.2	250.8	180.5	403.7	289	244.4
5.8	376.5	312.1	277.9	217.5	330.4	288.4	438	352.5		239.2	201.7	283.9	250.1	190.4	394.4	288.1	244.1
5.81667	366.6	308.6	315.2	221.4	333.5	288.9	439.7	351.2		236.4	193.3	286.6	238.8	183.1	400.1	288	244.9
5.83333	326.3	305.5	299.5	212.4	334.8	294.2	433	337.2		240.4	197.4	268.8	253.7	189.9	375.8	288.9	240.7
5.85	320.9	316.3	280	226.8	343.6	294	439.9	339.6		234	196.2	285.4	249.6	185.7	372.5	285.5	237.5
5.86667	315.8	305.7	268.8	235.6	335.3	288.8	436.5	339.9		231.4	203.8	317	259.5	183.4	398.9	284.2	237.9
5.88333	305.6	307.7	268.1	219.5	332.4	284.7	439.5	354.7		223.3	202.2	350.7	252.1	185.6	402.4	284.9	238.9
5.9	302.5	315.7	263.7	234.6	339	296.2	439.9	359.3		234.3	207.2	323.3	255.5	179.9	383	286.7	240.7
5.91667	301.2	313.4	275.2	235	342.5	281.3	447.8	354.7		231.4	203.6	314.4	254.2	181.7	383	272.3	242.7
5.93333	315.7	309.6	280.2	224.6	335.1	292.3	445.4	342		227.6	206.5	281.2	253.2	181.1	391.6	282.4	246.4
5.95	351.4	309.1	277.4	217.2	336.7	279.1	445.1	351.5		226.2	208.7	278.4	256.5	181.9	379	290.7	258.2
5.96667	372.7	302.1	290.9	222.2	324	282.5	441.5	346.7		234.7	215.9	297.9	255.2	175.1	370.4	287.5	252
5.98333	375.5	308.1	279.7	243.6	341.3	289	440.2	341.8		236.7	211.7	325.7	253.3	187.1	370	284.5	248.5
6	375.9	309.7	286.9	239.6	335.9	290.7	444.4	354.1		230.9	208.5	286.2	247	177.5	402	277.1	241.2
6.01667	360.4	301.3	292.2	223.5	330.8	284	440.6	364.4		237	201.1	280.8	251.3	186.6	376.9	295.2	252.3
6.03333	360.9	315.7	279.9	223.1	333.6	296.1	447	362.3		232.7	200.2	292.2	253.6	183.5	367.5	292.4	237.3
6.05	369.6	314.2	258.4	225.6	340.9	287.4	452.2	349.1		245.1	204.3	309.3	258.3	183.1	396.5	286.9	247.4
6.06667	363	306.2	261.5	232	335.8	294.8	444.2	342.1		237.2	201.5	282.2	256.3	185.6	394.3	293.9	241.9
6.08333	367.3	309.5	275.8	221.6	348.9	299.3	442.3	344.6		246.5	207.1	271.7	253.4	181.6	366.4	287.9	246.3
6.1	367	313.4	294.1	222.8	336	297.3	448.1	350.1		240.9	207	264.2	262.6	186.3	393.7	284.5	245.2
6.11667	346.3	308.7	292.3	218.7	334.3	310.9	453.2	346.6		228.9	217.4	270.9	250.8	180	380.1	297.9	245.9
6.13333	317.5	301.2	286.9	238	342.7	298.9	451.3	353.9		235.9	217.1	298.7	253.6	184.3	381.7	297.1	251.2
6.15	316.2	310.5	274.9	252.7	349	316.3	450.2	336.7		227.3	216.1	332.7	253.9	186.6	388.9	293.6	243.2
6.16667	302.2	307.5	287.1	243.4	336	297	450.9	355.1		240.9	219.5	330.4	255.7	186.1	395	293.9	261.2
6.18333	302.9	305.3	325.1	230.1	336	301.3	444.9	350.7		229.7	208.7	292	261.2	185.1	382	286.2	259.3
6.2	315.1	312.8	312	220.5	339.5	301	445.9	339.7		240.3	217.6	295.5	255	184.2	376	287.8	251.3
6.21667	340.1	308.7	278.3	212.3	338.2	288.9	442.5	349.5		228.8	211	296.8	256.7	187.5	389.8	300.1	247.6
6.23333	364.2	307.2	282.4	217.2	339.8	285.5	450.7	350.8		236.8	206.7	309.9	254.4	181.9	390.8	302.6	247.9
6.25	378.7	318.3	259.6	243.8	336.5	268.6	454.4	354.4		229.2	211.3	288.4	253.2	190.6	377.1	296	244.5
6.26667	374.6	308.5	270.3	260.4	339.5	260.3	452.3	355.8		240.3	212.8	278.5	261.7	184.9	387.4	289.1	245.8
6.28333	375	307.2	264.9	260.1	339.1	259.2	450.3	348.2		237.4	218.2	272.9	258.5	186.7	394.8	296.8	245.1
6.3	372.4	313.9	282.3	237.5	344.2	247.8	458.7	346.3		236.2	214.6	295.5	257.2	189.6	383.7	301.3	253.7
6.31667	360.8	310.5	323.5	223.2	344.9	249.7	452	353.8		240.3	225.3	326.2	258.8	189.9	395.2	303.6	251.4
6.33333	362.7	318.7	347.3	216.1	336.3	249.1	457.2	346.2		239.2	211.2	353.7	254.6	192.6	395	304	252.8
6.35	363	320.7	301.2	234.2	341.2	245.6	451	357.3		239.9	214.5	325.4	259.3	184.3	369.9	295.3	247.8
6.36667	367.3	308.9	287.2	231.4	343.6	237.3	458.8	352.7		234.8	214.9	303.4	259	190.1	392.5	289.9	244.5
6.38333	374	316.8	282.7	230.2	343.1	250.9	454.6	347.8		241.9	209.8	291.8	261.6	188.3	371.3	301.2	257.9
6.4	344.6	312.6	280.4	225.7	342.1	265.7	453.2	348.8		235.9	217.8	297.2	254.2	191.5	396.1	312.3	251.9
6.41667	308.6	319	300.8	232	342.9	285	459.9	347.2		243.8	214.5	288.4	254	191.9	391.7	306.8	254.6
6.43333	311.5	319.9	296.6	237.2	353.4	306.6	466	352.2		244	221	291.5	258.3	189.4	379	306.1	254.9
6.45	306.8	311.3	299.5	269	345.3	328.6	462.5	365		248.3	216.7	268.6	254.6	193.4	387.6	312.1	249.8
6.46667	313.9	308.5	273.1	275.1	345.9	335	457.8	351.2		242	220.4	292.3	258.4	188.7	404.4	294.7	252.6
6.48333	333	308.9	276.5	250.8	348.6	332.4	452.8	351.9		242.9	216.6	323.2	257.2	195	396.3	294.1	255.5
6.5	360.7	309.9	274.3	227.6	349.8	330.3	470.3	340.7		237.8	212.6	315.2	247.5	186.4	403.8	303.5	253.3
6.51667	374.8	313.4	269.7	227.1	345.7	327.5	465.7	346.2		242.3	212.9	293.4	254.9	193.8	408.3	313.4	261.7
6.53333	373.2	319.1	267.4	221.8	349.4	327.9	463.4	349.5		245.5	216.5	284.4	255.8	196.6	388.2	310.5	249
6.55	370.4	307.8	282.6	236.7	346.5	309	463	356		240.7	216.9	284.9	263.8	190	390.6	308.3	255.9
6.56667	365.7	312.3	315.8	259.4	356.4	301.2	463.9	349.1		250.5	218.7	310.9	260.5	198.6	410.8	306.3	258.6
6.58333	373.7	316.4	322	251.3	350	308.8	466.6	352.5		237.1	220.7	314.4	273.9	199	408.4	293.9	258.9
6.6	335.1	311.7	298.7	236.3	353.5	298.6	466.1	344.3		252.6	213.2	296.8	259.3	195.5	392.5	297.5	256.4
6.61667	317.7	315.4	279.1	225.7	356.5	305.9	464.3	347.5		245.2	214.8	301.3	263.4	202	399	297.9	250
6.63333	314.5	308.1	271.2	227.7	355.2	316.4	469.2	350.5		247.6	215.8	333.9	259.6	196.8	397.3	306.6	256.1
6.65	305.4	305.4	269.3	247.8	349	310.9	460.4	341.4		245.4	225.5	316.7	259.1	203	399.6	312.1	250
6.66667	301.6	304.2	270.8	244.5	360.2	316.2	466.1	341.1		248.5	225.9	295.3	273.7	203	399.1	300.8	255.2
6.68333	326.2	306.6	256.3	236.3	352.3	328.1	471.2	349.7		248.1	232	299.4	263.6	201.3	408.5	305.3	253.3
6.7	351.1	314.7	271.6	243.8	354.6	327.2	471	350		251.5	229.4	275.7	260.5	199.3	415	302.4	262.6
6.71667	389.1	314.1	287.5	244	356.7	325.3	478.8	346.5		248.5	228.2	299.3	266.1	193.9	396	299.5	256
6.73333	384.7	315.7	317.3	231	357	332	465.1	343.5		247.2	217.6	311.1	263.4	194.8	394.3	302.5	258.6
6.75	391.9	309	351.6	225.8	358.7	323.3	475.4	355.2		249.6	220.5	343.9	270.8	190.7	410.5	315.9	252.9
6.76667	327.1	315.9	317.4	229.4	356.4	321.3	472.5	349		249.1	226.1	302.5	264.1	195.3	410.9	301.3	252.1
6.78333	314.9	309.9	287.7	245.5	350.9	328	493.7	364.6		255.1	226	302.1	263.1	195.9	384.2	308.8	263.3
6.8	309.8	308.3	268.9	237.3	361.4	327.1	482.7	361.5		251.6	219.9	282.1	270.8	197.7	397	306.4	258.7
6.81667	303.1	310.6	279.4	233.6	362.8	321	489.9	355.9		250.2	220.9	289.8	252.8	201.4	412.6	308.6	252.9
6.83333	309.9	305.8	273	249.5	363.8	321.9	485.7	357.7		243.1	221	296.9	261.6	195	407.8	308.1	259
6.85	338.5	299.9	269.5	248.2	368.3	322.8	483.4	345.9		249.1	223.6	339.4	257.6	198.5	394.1	304.6	259
6.86667	367.5	314.7	282.9	235.1	360.3	320.4	478.7	352.9		253.3	223.9	331.3	257.1	198.1	416.5	304.9	278
6.88333	376.6	302.9	290.8	239.3	354	330.4	486.7	361.6		246.1	223.1	317.2	263.1	197.1	397	306.7	266.8
6.9	380.4	305.6	278.9	241.6	359.2	330.1	486.1	344.7		256.4	221.3	300.6	269.1	206.5	402.2	312.2	260.1
6.91667	374	310.3	292.8	236.8	372.9	336.9	488.6	356.2		252.6	231.4	296.6	277.7	195.7	420.2	321.5	254
6.93333	340.3	295.3	301.6	231.8	387.7	332.7	484.6	353.4		256.4	224.1	303	269.3	202	409.6	304.6	258.3
6.95	321	308.9	277.7	241.5	374.1	331.2	486.7	351.3		252.6	233.5	338.5	270.8	196.8	390.1	322.2	255.4
6.96667	328.8	310.7	303.9	256.6	371.4	330.2	480	352.8		258.1	220.1	328.5	267.5	202.2	401.2	314.3	262.8
6.98333	341.9	301.4	312.6	241.4	372.8	329.2	487.8	355.6		258	237.3	324.6	264.5	200.3	421.8	327	250.9
7	367.9	310.6	289.6	232.4	365.2	320.4	489.7	341.2		259.7	231	341.4	274.4	205.2	419.4	326.1	263.1
7.01667	363.7	308.3	284.8	257.1	372.8	334.8	494.3	353.1		248.7	231	330.7	258.5	204.2	400	320	258.7
7.03333	322.5	311.5	272	257	363.5	335.8	497.5	358.2		257.6	221.5	307.6	267.6	202.3	422.5	310.5	262.4
7.05	312.5	320.6	270.3	241.4	373.4	325.6	486.7	347.7		255.4	228.8	285.5	267.9	201.2	429.8	312.7	265.5
7.06667	302.6	309.7	290.8	231.5	371.3	330.3	485.2	347.1		257.6	225.5	284.2	255.9	198.4	417.9	319.9	263.3
7.08333	305.5	308.2	328.2	241.5	367.6	341.3	483.3	355.7		261.4	230.3	305.6	262.9	198.1	397.2	315.7	273.4
7.1	305.9	313.2	307.3	254.9	380.9	334.1	487.4	340.4		255	234.4	357.8	258.7	205.8	410.9	309	255.8
7.11667	330.2	301.8	293.2	245.5	367.2	333.2	487	339.2		246.4	240.1	356.2	263.3	198.2	425.7	326.3	264.6
7.13333	350.8	302	274.9	242.5	368.8	328.7	486.1	332.1		252.1	244.3	314.5	262.2	204.1	403.5	320	256.3
7.15	361.3	307.2	280.2	247.3	369.8	301.3	485.2	352.8		250.3	238	305.4	262.9	199.7	396.1	325.2	263
7.16667	325.6	303.6	288.7	260.9	368.2	295	495.4	346.9		264.7	237.1	301.6	272.5	203.4	412.4	319.8	261.3
7.18333	312.1	297.9	282.9	254.1	375.8	292.4	495.9	354.8		262.4	226.6	286.4	263.4	202.2	411.2	331.2	262.8
7.2	307.7	310.1	279.5	242.8	373.4	274.8	502.9	359.3		266.4	233	309.4	274.3	203.8	423.1	321.5	265.6
7.21667	305.4	304.8	273.9	236.9	376.5	280.2	504.7	353.9		257.4	229.5	301.3	273.2	208.3	425.6	309	253.8
7.23333	313.7	307.6	281.8	237	365.7	275.7	492	344.5		270.9	236.9	352.9	262.6	206.3	425.1	319.4	268.7
7.25	341.6	304.5	288	237.9	377.2	276.8	488.5	352.7		264.9	245.6	359	272.5	204.3	415.5	313	259.4
7.26667	368.8	298	332.1	261.3	387.4	275.2	432.7	341.7		266.7	239	340.8	270.3	206.6	411.6	318.2	262.5
7.28333	385.4	300.6	313	258.5	386.2	274.2	407.9	354.9		249.7	241.6	302.9	276.1	203.5	431	326.7	262.1
7.3	377.3	309.6	284.5	246.8	377.4	285.3	398.5	352.4		260.3	231.6	327.2	272.6	203.9	425.8	309.7	262.9
7.31667	374.4	290.9	284.9	227.1	381.4	301.5	398.9	359.8		261.8	233.7	302.8	277.3	204.9	425.1	316	268.2
7.33333	345.5	303.1	287.6	238.3	368.1	326.1	392.9	354.8		260.2	225.3	292.6	267.5	205	413.8	314.3	255.9
7.35	317.4	303.9	273.2	230.3	387.9	346.8	393	351.5		264.4	230.2	299.9	270.5	204.1	426.9	328.7	268.1
7.36667	317.9	304	267.8	247.3	374.2	361.7	408.6	331.2		267.5	231.8	351.9	272.7	205.7	420.9	324.6	263.7
7.38333	305.9	303.1	289.6	267.8	388.7	355	456.5	347.5		257.6	238	326.9	260.8	205.1	416.7	318.9	264
7.4	309.4	297.8	309.8	257.6	380.3	364.5	501.9	356.6		272.6	246.6	301.9	270.5	199	410.9	314.7	260.5
7.41667	322.9	297.1	287.5	251.9	376.6	356.3	517.5	351.8		264.3	241.8	302	264.9	205	430	316.7	266.1
7.43333	352.4	303.1	282.7	248.5	383	337.9	528.3	354.6		270.1	245.4	335.7	269.3	201.5	436.1	312.6	276.4
7.45	376.3	297.8	271.7	240.3	396.8	335.4	522	349.8		264.8	238.1	338.6	273.4	201.9	418.7	320.7	274.3
7.46667	337.1	292.8	293.6	236.6	378	326.4	522.9	360.3		263.2	236.3	345	271.3	202.9	425	321.8	272.3
7.48333	315.4	296.4	316.4	252.5	385.8	320.9	519.5	370.4		263.9	234.3	311.3	266.7	201.3	437.1	316.8	265.1
7.5	310.7	284	318.7	268.5	392	334	520.8	343.3		282.1	236.6	360.3	274.7	208.8	430.1	318.7	271.9
7.51667	309.2	294.4	298.2	262.9	379	320.2	523.6	339.6		269.9	246.5	332.4	277.6	201.2	415.3	318.1	275.4
7.53333	303.8	284.5	289.4	247.4	369.5	317.4	524.8	358.1		277.8	241.7	312.2	262.4	206.2	411.6	319.7	275.9
7.55	324.7	289.3	286.5	257.4	379.4	318.8	511.1	356.3		262.4	246.3	322.4	275.9	201.7	437.9	322.6	282
7.56667	360.4	298.5	286.9	258.8	379.9	338	505	357.8		267.2	245.2	349.7	272.5	202	447.5	319.5	285.5
7.58333	373.9	303.3	285.3	244.3	387.8	335.4	498.1	358.8		261.8	240.7	354.3	273.8	207.2	425.5	331.2	274.7
7.6	380.9	294.4	298.9	238.8	381.9	334.2	509.3	342.5		274.1	239.2	319.5	280	207.9	416.4	340.5	278.4
7.61667	378.4	303.6	307.6	249.4	381.1	350.5	503.8	364.6		266.2	231.2	328.6	280.9	213.2	425.6	343.5	278.9
7.63333	363.4	293.6	282	248.2	382.7	338.8	503.1	343.3		275.5	244.9	313.4	273.2	208.7	441.5	343.9	282.4
7.65	325	305.2	278.5	261	389	338.1	500.4	356		261.2	251	324.3	274.8	209	412.5	341.4	269.1
7.66667	316.4	305	289.3	270.5	390.7	345.8	507.8	342.2		277.5	258.8	351.7	275.8	203.8	414.7	326.4	274.2
7.68333	313.5	297.2	307.2	258	385.8	345.1	505.4	353.3		265.8	257.2	372.7	269.1	203.1	434	322.6	274.9
7.7	311.3	298.8	292.3	240.7	386	340.7	513.7	355.6		267.7	251.8	321.9	279.4	205.6	427.9	329	277.6
7.71667	311	306.7	273	247.9	395.5	336.6	509.6	350.8		270.6	239.9	328.9	267.8	204.2	418.5	334.2	277.9
7.73333	346.5	294.9	286	265.3	389.9	330	506.5	361.3		277.9	246.9	325.5	280.9	208.4	433.6	334.9	279.7
7.75	367.7	305.4	293.8	251.2	390.8	334.3	503.5	360.2		265	248.7	323.3	267.2	202.9	442.6	326.3	280
7.76667	373.1	299.9	310.4	250.2	390.1	341	503.9	341.9		276.2	248.1	339.5	276.5	213.4	447.3	325.2	277.4
7.78333	330.7	294.8	298.8	260.4	383.1	347	510.9	350.6		283	254.9	386.6	274.3	215.6	426.3	327.6	285.7
7.8	318	302.8	277.4	264.4	402.9	342.7	510.1	346.6		281.3	248.1	358.4	267.1	208.2	419.1	337.5	284.2
7.81667	303.3	292.6	270.1	252.8	384.8	337.8	519.5	339.2		284.5	252.3	314.8	278.3	214.9	427.7	335.3	280.6
7.83333	304.8	287.8	275.2	245.2	386.7	343.2	522.5	340.8		271.1	252	312.4	266.8	208.9	431.4	335.9	287
7.85	305.8	294.9	281.1	246.8	393	353.4	515.2	353.1		275.3	252	310.3	274.8	212.5	433.6	342	276.6
7.86667	321.5	298.4	294	261.7	384.4	341.8	513.3	358.2		272.5	258.1	320.4	279.3	214.7	408	335.1	277.8
7.88333	359.1	296.3	290.5	259.4	397	350.6	510.4	342.5		271.2	251.1	359.8	278.2	208.9	420.1	332.4	274.5
7.9	372.9	303	307.4	252.1	391.8	358.7	499.7	336.9		275.3	257.1	395.4	284.9	215.9	445.1	328.6	269.7
7.91667	384.2	296.9	321.7	254.6	384.2	339.1	506.9	348.2		280.2	250.1	355.3	273.8	215.1	453.7	342.8	276.9
7.93333	374.5	300.5	298.6	275.7	400.5	341.6	511.3	350.6		266.2	281.1	326.5	312.9	215.9	421.1	315.3	269.2
7.95	374.1	307.8	279.9	262.1	383.6	351.5	515.4	357		275.5	271.5	299.3	315.6	211.7	419.3	324.6	285.5
7.96667	373.1	301.1	273.9	253.4	395.2	345.9	509	350.1		266.4	252.9	303.4	356.6	210.2	434.6	331.9	279
7.98333	359.2	294.1	272.3	253.1	407.1	343.4	509.9	353.5		279.9	250.4	305.6	334.5	212.6	422	329.4	282.5
8	317.5	302.7	266.8	247.8	410.5	357.8	510	354.8		276.5	239.7	343.1	289.1	208.6	428.9	343.8	271.7
8.01667	321.4	297.8	279.1	264.4	415.3	351.9	513.5	340.3		283	254.7	409.6	278.6	208.9	427.3	346.6	272
8.03333	309.8	298	293.7	285.7	403.8	344.2	525.2	342.6		276.9	266.2	389.2	267.7	209	424.4	343.5	272.9
8.05	305.7	308.4	287	282.5	397.1	349.2	525.9	346.4		281.3	267.8	364.8	267.1	208.1	428.4	335.3	275.6
8.06667	304.2	298.5	295.7	254.4	398.7	348.2	524.3	347.8		278.4	271.4	311.4	278.3	217.5	429.8	334.2	274.2
8.08333	307.5	298.1	323.6	252.3	402.4	352.3	521.4	342.8		285	252	315.4	278.9	214.5	433.4	339.2	276.6
8.1	339.1	303.2	321.4	252.9	403.8	359.8	508.1	354.2		285	249.4	303.8	290.2	218.4	431.3	340.8	289.1
8.11667	365.8	297.8	294.2	266.8	404.8	352.2	509.7	359.2		290.2	246.5	355.9	293.5	218.1	428.5	340.1	278.6
8.13333	382.4	298.8	272.4	279.1	408.4	357.2	510.8	345.2		277.1	249.5	335.2	294.8	215.4	430.7	343.5	284.1
8.15	376.9	300.7	278.1	274.7	409.8	350.1	504.9	367.5		276.1	253.4	322.9	288.1	218.5	417.1	347.4	275.4
8.16667	341.5	300.1	299.6	258.5	412.6	350.9	504.1	339.4		271.7	263.4	323	283.7	212	433.4	337.5	284.6
8.18333	312.5	300	291.3	251.2	401.7	344.1	509.2	339.1		279.7	263.1	353.3	269.3	218.9	428.7	343.1	280.6
8.2	311.2	303.5	272	251	403.7	350.1	517.7	353.7		276.5	266.5	354.8	270.8	216.4	436.7	348.2	279.2
8.21667	305	296.1	301.4	264	404	363	510.2	350.5		288.2	269.5	322.1	281.3	219.5	438.7	332.5	268.7
8.23333	298.9	298.6	330.5	272.6	410.9	346.6	513.5	350.9		274.2	259.6	327.2	274.1	215.6	421.7	341.6	269.8
8.25	306.8	301.5	343.9	267.8	398.9	358.2	507	358.8		282.7	260.8	341.7	287	222	433.2	335	273.4
8.26667	326	298.5	307.7	278.3	418	356.3	525.2	350.3		283	259.2	361.9	280.1	220.3	433	354	280
8.28333	366.6	298.1	302.8	276.3	423.2	351.7	514.6	370.8		296	272	337.8	289.5	217.4	449.4	354.9	280
8.3	374.7	302.3	289.1	265.7	411.8	358	507.2	359.7		288.2	273.7	302.5	277.8	217.9	429.2	343.7	283.5
8.31667	381	296	279.5	256.4	412.8	363.2	520.9	346.1		293.2	270.5	333.2	271.1	218	422.1	345.7	279.6
8.33333	371.5	307.2	283.4	259.5	417.3	353.5	516.7	354.7		292.2	265.7	368.5	277.9	218.9	420.3	346	284.3
8.35	370.2	301	283.9	290.2	413.6	364.3	520.4	375.7		290.3	259	349	266.7	217.3	436.5	333	281.4
8.36667	371.8	302.7	290	292.6	415.7	359.7	498.4	353.5		287.4	259	351.6	271.3	220.5	441.3	340.8	280.2
8.38333	372.8	303.8	305.6	277.4	408.2	366	505	347		290.5	264.2	365.8	284.9	223.5	413.4	346.2	269.7
8.4	369.5	300.5	347.4	256.3	414.9	355.6	499.8	361.7		273.6	263.2	323.6	282.4	222.2	432.9	353.8	282.1
8.41667	325.8	300.9	335.8	255.2	415.9	358.5	499.1	370.6		288.7	269.1	317	285.5	231.5	444.2	336.7	271.6
8.43333	321.7	309.6	291.9	254.2	416	369.3	505.9	369.2		280.3	270.7	331.7	282.5	221.6	431.9	338.7	291
8.45	315	305.6	279.9	261.8	422.1	362.1	511.2	350		284.4	277.9	367.4	287.3	227.1	417.3	349.3	270.2
8.46667	314.1	303.4	282.6	262.8	419.4	356.8	519.7	359.5		281.5	272.8	352.4	281	221	442.1	349	282.1
8.48333	301	305.6	266.5	282	419.9	359.6	515.6	356.5		288	267.8	325.2	282.7	222.7	445.5	346.4	276
8.5	302.7	293	277.3	272.5	424.3	375.5	524.6	365.6		282.8	282.7	338	286.4	224.7	432.1	353	277.7
8.51667	298.6	307.7	288.3	268.6	418.9	361.2	513.7	363.3		295.1	267.4	366.5	276.5	225.8	419	356.5	278
8.53333	324.9	299.3	302.7	268.1	420.7	353.2	512.2	370.8		292.4	261.9	352.2	297.7	230.3	425.1	344.8	277.1
8.55	357	302.5	300.4	284.4	417.5	370.3	518.1	434.1		292.9	275	337.3	281.5	221.4	437.1	350.2	280.5
8.56667	377.7	302.9	306.1	276.3	425.7	366.6	517.1	369.2		280.9	279.3	359.5	280.2	228	444.8	348.3	278.3
8.58333	378	297.8	310.3	274.3	413	366.9	513.6	358.6		296.5	280.8	341.8	286.9	222.8	438.9	344.6	280.6
8.6	374.5	300.6	315.2	280.1	421.6	364.4	519.1	371.9		284	281	346.3	282.7	223.8	427.7	329.4	278.4
8.61667	371.5	304.4	325.4	268.8	428.9	373.6	513.8	344.3		293.5	271.5	386.7	283.8	221.4	438.3	342.9	282.4
8.63333	376.3	295.4	346.7	267.2	416.9	367	508.8	338.9		287	275.4	357.6	296.9	221.9	440.6	347.3	288.1
8.65	374.3	294.2	303.7	268.8	425.6	362.7	509	343.3		293.1	275.9	338.1	283.2	223.7	413.3	340.1	289.7
8.66667	365.4	296.6	291	278.5	432	363.8	514.2	350		279.2	279.4	328.5	281.3	226.6	429.5	350.4	290
8.68333	324.4	296.1	282.4	291	432.9	368.3	513.2	362.1		295.5	281.7	338.4	290.6	225.2	436	343.1	285.7
8.7	323.2	289.1	288.1	290.1	422.6	369.8	518.2	349		287.3	280.2	372.6	284.9	231.1	442.9	340.4	291.1
8.71667	312.6	302.8	307	274.5	418.6	377.8	515.4	340.4		299.1	280.9	396.3	275.5	231	420.5	358.2	287.6
8.73333	310.4	296.9	306.1	274.9	425	370.2	520.2	352.2		294.7	271.5	334.6	275.9	221.5	426.1	345.1	289.7
8.75	306.6	297	324.2	266.3	421.5	364	507.1	358.9		305.3	265.9	325.4	273.4	234	439.9	351.1	292.5
8.76667	312.1	307.4	309.3	279.9	427.1	357.9	510.5	345.2		290.3	273.8	345.8	270.5	223.6	434.8	360.5	294.7
8.78333	343.1	301	290.9	306.8	432.2	364	514.4	353.7		311.7	279.2	327	289.1	228.3	424.6	358.3	290.6
8.8	370.7	299.3	286.7	290.5	437.2	361.4	507.1	359.1		292.1	285.9	349.5	284.7	231.5	431	347.7	284
8.81667	351.1	311.1	277.4	275.4	448.3	357.6	514.8	364.2		293.7	286	363.8	286.7	232.8	427.5	364.4	286.6
8.83333	319.9	299.8	296.9	269.9	458.4	370.1	506.3	356.2		291.4	282.5	370.9	287.8	232.1	441.8	362.3	283.5
8.85	304.4	302.6	305.6	251.8	440.8	365.7	497.4	366.4		297.1	267.4	386.5	287.1	229.4	436.8	352.5	291.7
8.86667	300.6	303.8	307.7	260.6	453.1	360.8	510.9	369.5		293.6	268.8	349.8	287.9	230.8	429.2	353.8	281.6
8.88333	300.9	298.8	320.9	284.3	442.6	373.9	518.8	352.6		296.5	274.2	346.5	290.6	224.1	433.3	333.2	285.4
8.9	318.3	306.8	308	302.2	446.4	370.5	524.2	357.3		296.1	279.2	348.7	290.1	224	441.7	346.9	283.3
8.91667	356.9	303.5	294.2	295.1	445.2	366.6	524	349.3		295.1	287.7	382.7	290.9	226.6	452.3	354.8	288.2
8.93333	380.3	301.3	335.5	273.4	440.7	368.7	526.6	354.2		300.2	288	357	287.5	220.9	437.3	350.6	294.1
8.95	387	299.3	354.1	270.5	453.9	381.1	523.5	344.5		284.5	280.2	324.1	289.7	234	430.1	357	285.4
8.96667	374.9	300.8	309.9	273.5	461.8	378.4	519.6	361.4		294.4	282.6	343.9	283	229.7	436.1	360.5	299.7
8.98333	368.1	299.2	297.9	280	454.2	372	503.5	361		297.5	279.5	352.6	277	231.7	439.5	349.7	275.8
9	372.3	307.7	296.3	280.9	448.8	382.4	505.7	353.2		306.6	289.4	350.4	290	233.7	439.1	356.9	293.3
9.01667	364.3	301.9	306.4	268.9	441.2	369.9	506	344.4		288.8	297.7	340.5	287.4	228.8	450.2	354.4	287
9.03333	366.6	302.9	298.3	284.5	441.9	370	499.9	348.4		301.1	294.5	396.3	286.2	235.9	429.3	349.7	290.5
9.05	323.7	303	324	306.6	441.1	390.8	511.2	347.2		293.2	292.3	361.5	291.2	232.5	441.1	342.2	297.8
9.06667	317	309	303.2	286.2	441.9	380.6	506.7	349.6		299.1	284.3	358.5	285.8	232.9	441	348.1	294.5
9.08333	308.4	300.4	303	273.1	448.9	374	509.6	358.6		299	279.7	390.1	303.3	239	436.7	348	283.7
9.1	312.4	306.1	290	282.5	441.2	380.9	512.5	356.4		302.5	277.4	406.4	306.5	231.2	427.4	351.5	282.2
9.11667	313.8	306.9	277.9	281.2	451.4	372.3	506.9	353.5		284.8	271.9	394	299.1	237.1	427.9	355.4	286.4
9.13333	306.2	304.4	274.5	270.7	455.4	347.8	522.5	360.8		304.9	285	368.9	305.1	237	429.7	350.7	287.8
9.15	331.1	304.1	281.9	271.8	450.7	330.7	506.5	361.8		298.1	288.5	405.3	305.9	236.1	430.8	346.6	294.9
9.16667	366.5	304.9	319.2	278	457.9	327.5	503.5	346.4		300.6	284.6	364.4	290.4	232.6	437	364.2	286.3
9.18333	386.8	300.7	361.4	297	457.1	317.6	514.3	354.7		290.6	294.5	339.8	287.5	232.1	449.1	351.9	293
9.2	329.9	300.1	368	291	457	306.7	512.3	357.6		303	283.7	365.1	294.8	239.8	436.9	345.1	287.8
9.21667	317.9	313.8	314.4	277.2	457.9	306.1	506.9	348.4		297	283.1	391.8	296.7	229.6	436.1	352.8	288
9.23333	310.2	297.6	316.6	276.2	464.9	320.7	503.5	361		308.2	291.7	407.5	287.4	233.4	421.3	337.4	290.6
9.25	308.3	289.3	285.8	274.3	465.9	311.4	507.4	346.3		303.7	286.8	392.4	286.2	237.4	433.1	344.8	292.7
9.26667	304.6	297.7	279.1	294.8	459.9	311.1	507.1	353.8		300.5	289.6	351.4	293.8	232.7	445.1	347.6	299
9.28333	320.5	291.9	288.5	285.5	462.6	300.6	507.9	355.7		303.5	294.3	368.3	289.7	239	441.6	335	304.2
9.3	358.1	292	305.4	298	467.3	311.3	514	347.3		309.1	291.4	355.9	296	236.4	424.6	349.7	306.6
9.31667	377	303.2	343.1	298	460.1	319.7	513.1	351.4		311.6	295.4	366.4	291.7	243	435.3	343.9	305.2
9.33333	388.2	302.2	354.3	291.1	455.7	327.7	504.4	354.5		299	295.1	412.7	284.2	240.4	424.7	339.7	305.9
9.35	380.3	293.4	335	278.9	462	369.5	525.7	346.3		302.5	301.9	412.1	292.7	240.9	446.6	347.7	325
9.36667	375.7	298.2	302.1	279.9	458.5	376.8	512.1	353		306.4	300.3	363.6	291.2	241.9	428.8	348	322.4
9.38333	362.1	311	300.3	287.8	462.4	397.7	499	370.3		319.9	301.8	335.4	291.9	241.1	427.2	344.5	329
9.4	325.7	302.4	300.9	297.5	470.7	399.7	499	357.1		292.3	298.5	366.2	295.4	246.2	421	344.1	327.3
9.41667	331.1	302	291.5	283.2	456.3	419	503.3	359.6		304.1	286.8	395.4	297.7	235.7	438.3	340.6	320.1
9.43333	313.7	303.7	299.7	296.9	466.4	426.8	499.6	351.3		296.2	287	365.7	296.2	241.1	434.6	344.4	319.2
9.45	315.7	295.3	312.1	290.9	473	414.9	501.7	351.9		309	293.9	355.6	301.2	241	435.8	343.2	313.8
9.46667	306.4	299.4	336.2	277.2	460.9	399.4	514.1	346.8		306.4	287.1	361.1	298.4	245.3	429.1	364.6	321.8
9.48333	322.5	299.9	308.4	293.4	463.6	395.6	501	355.6		308.6	291.3	399.9	309.3	248.5	429.9	342.5	322
9.5	360.1	301.7	304.6	288.7	472.6	391.6	509.7	355.1		292.5	297.1	355	298.7	238.6	423.1	348.1	328.9
9.51667	380.8	298.5	337.8	282	463.4	373.8	507.4	357.6		310.2	294.4	355.9	292	244.1	422.1	344.6	320.3
9.53333	386.2	303.3	300.8	284.6	470	386.9	501	354.5		302.2	298.4	406.1	296.3	243.2	447.1	349.3	323.5
9.55	375.6	311.7	288.9	286.7	482.1	395.6	500.1	367.9		312.4	293.7	400.8	296.9	236.1	411.6	333.5	309.2
9.56667	377.7	305	276	296.5	457.8	385.6	508.7	361.1		297.4	302.6	350	290.9	247.3	425.8	343.4	309
9.58333	348.6	294.6	287.2	292.6	472.7	376.4	518.5	355.8		312.6	310.7	352.6	302.2	241	421.6	348.2	309.9
9.6	323.9	295.8	302.6	294.7	460.9	422.8	502.5	358.6		304.3	304.9	366.8	305.5	242.7	441	337.7	309.1
9.61667	314.5	293.4	327.2	311.4	470.5	382.3	501.2	365.9		315.3	306.7	373	293.8	249.9	428.9	344.9	320.3
9.63333	311.5	298.2	337.4	287.7	480.4	400.2	513.1	362.5		307.3	295.7	373.9	303.5	246.5	426.4	348.4	310.5
9.65	317.1	300.6	318	282.8	477.5	385.3	510.4	362.1		313.1	285.6	390.4	291	250.4	420.9	343.7	317
9.66667	330.9	300.1	314.5	279.5	473.6	388.5	496.2	344.7		294.9	290.3	368.4	294.5	251.8	417.5	350.9	315.3
9.68333	363	295.7	288.1	305	467.9	386.3	490	365.7		320.1	294.4	346.4	298.4	244.2	443	352.7	306.4
9.7	378.6	298.6	324.3	323.2	481	391.2	510.7	355.6		308.8	288.9	362.5	289.4	252.7	433.5	353	315.6
9.71667	380.7	312.8	324	285.8	467.2	383.2	494.5	352.5		321.1	302	408.8	295.1	241.7	414	359.9	307.3
9.73333	345.5	317.3	296.3	297.2	473.9	388.2	490.6	365.9		306.3	304.6	408.1	301.9	242.8	413.1	353.9	313.1
9.75	323.5	301.5	316.8	287.5	472.3	388.9	493.5	357.3		313.8	304.1	380.3	291.6	250.8	414.7	330.6	314.7
9.76667	318.7	296.7	321.3	284.5	468.6	388.1	499.1	357.9		307.1	306.6	416.4	295.4	248.4	428.8	380.2	317.6
9.78333	310.3	296.1	349.6	310.9	471.5	389.7	492.1	356.3		316.5	296.6	415.2	302.8	250.6	429.8	381.8	324
9.8	311.8	304.7	334.4	288.5	473.7	396	501.5	356.9		313.5	296.9	357.1	296.1	246.6	433.4	394.9	311.9
9.81667	312.8	303.2	309	288.9	474.8	387.4	498.5	358.7		313.9	303.9	404.6	296	252.1	437.4	410.6	320.6
9.83333	338.1	307.4	311.6	294.2	462	396.6	502.4	359.8		301	297.1	432.6	303.8	255.5	425.8	396.2	313.2
9.85	363.1	300.1	305	307.9	481.9	392.6	490.8	353.1		320	304.8	426	299.6	255.1	433.8	385.7	316.5
9.86667	382	303.5	311.9	289	475.1	389.5	490.1	346.1		305.3	304.1	381	300	255.9	439.2	385.1	306.6
9.88333	381.1	310	289.5	284.7	484.5	404.6	487.4	369.4		312.8	310.1	406.9	306	251.7	434.7	408.4	334.6
9.9	324.8	303.1	305.5	288.4	482.3	395.4	496.6	352.6		300	305.7	415.6	299.1	252	445.3	391.6	319.4
9.91667	317.2	301.3	335.3	320	483.8	398.5	499.5	368.5		308.6	306.8	361.5	298.1	254.6	439	407.5	316.5
9.93333	314.4	304.5	321.2	304.4	474.5	396.3	490.4	357.7		307.2	303.5	372.3	299.7	249.8	429.5	420.9	315.2
9.95	315.8	306.7	316.7	296.3	468	396	485.7	363.1		322.6	308.3	400.6	301.7	256	428.2	408	323.7
9.96667	309.9	298.3	319.6	300.4	471.5	402.1	504.1	357		309.1	302	426	295.9	254.3	423.7	412.3	319.6
9.98333	323.8	293.7	297.5	291.4	465.9	407.2	492.8	363		323.7	299.4	407.8	290.8	258.4	441.3	412	316.5
10	356.8	301.7	293.6	287.6	479.8	392.3	491.2	360.4		306.7	301.6	351.8	297.9	261.5	454	405.1	317.8
10.0167	378.6	295.9	306.9	319.9	460.1	403.3	494.5	360.9		334.6	300.2	360.6	307.5	251.6	441.9	388.6	311.1
10.0333	389.3	295.1	313.9	293.2	479.9	403.9	489.7	358.4		321.1	293.1	363.5	305.3	259.7	426.4	405.4	306.7
10.05	383	293.3	310.5	293	475.7	404	496	360.6		326.2	308.6	361.3	305.9	255.6	423.5	399	319.1
10.0667	382.1	297.4	313.5	292.1	475.1	406.6	490.8	356.6		308.7	305.5	405.1	316.4	256.8	424.8	397.3	312.1
10.0833	386.3	293.6	302.7	289.4	474.1	402.6	486.7	351.8		323.7	314.6	430.1	313.5	259.6	431	384.1	321.5
10.1	341.1	294.8	299.5	311.5	477.5	404.7	493.9	371		328.3	309.8	420.5	307	256.5	431.9	396.1	309.8
10.1167	330.6	307.1	293	306.7	487.4	404.1	495.7	377.1		328.9	304.8	370.8	306.1	257.8	442.4	400.3	313.4
10.1333	322.3	294	316.3	304.4	477.5	410.1	496	372.7		303	310.2	406.4	305.2	258	443.8	416.5	311.3
10.15	321.2	304.4	309.1	312.7	483.1	404.8	493.4	386.8		320.3	317.8	381	301.6	261.5	443.1	409.1	307.6
10.1667	316.7	310.1	318.5	319.9	479.6	398.9	486.1	375.7		307.1	315.4	406.1	298.5	262.8	447.3	415.1	320
10.1833	329.1	304.8	298.2	301.8	488.6	404.2	491.2	382.9		324.3	313.3	391.3	296.3	257.8	430.6	410.7	308.8
10.2	363.6	297.2	293.7	295.1	481.2	399.7	492.8	370.9		305	311.3	387.6	303.8	261.4	424	403.2	314.2
10.2167	391.6	295.3	287	308	475.8	419	493.8	376.2		313.6	307.6	407	303.1	259.3	443	400.4	315.8
10.2333	395.4	299.4	288.7	317.5	470.8	419	498.3	370		320	311.4	369	306.5	256.5	451.7	393.1	314.2
10.25	385.5	294.7	303.7	317.9	471.8	410.4	498.9	350.1		330.4	306.7	383.7	305.2	259.5	442.4	382.6	324.4
10.2667	336.7	290.6	292.7	298.1	464.2	407.5	498.1	360.4		315.4	308.7	415.1	306.8	259.9	444.7	375.2	314.5
10.2833	331.8	293.5	293	308.4	474.4	413.1	480.7	356.6		326.3	297.7	383	308.7	264.3	444.1	386.3	319.3
10.3	317.3	292.2	320.7	317.6	473.2	415.6	490.5	371.6		324.3	303.1	387.3	301.2	264	436.2	393.8	315.6
10.3167	318.8	292.9	365.9	299.8	477.3	422.9	492.7	394.4		337.9	303.9	413.8	312.3	258	442.9	398.3	310.8
10.3333	309.5	299.9	337.5	299.1	484	401.4	498.1	356		318.1	302.3	426.9	313.8	266.6	432.6	396.3	319.6
10.35	318.6	300.9	331.9	299	483.1	414	492	360.3		307.6	304.6	377.7	311.4	265.2	426.9	410.7	308.7
10.3667	353.5	295.8	327.7	311.1	475.2	414	488.5	345.3		311.4	304.1	378	305.9	266.8	437.4	409.2	319.3
10.3833	379.9	290.8	306.3	300.6	474.2	414.9	488.9	348.5		327.5	317	425.6	314.6	271.3	442.2	405.6	314.7
10.4	393.8	291.8	314.7	303.5	485.3	406.3	488.1	358.4		319.3	318.7	390.5	309.8	264.1	443.8	414.6	315.8
10.4167	384.5	295.4	321	330.7	473.8	404.3	497.5	364.1		305.2	325.9	371	307.4	270.1	432.7	406.3	316
10.4333	351.2	292.5	302	312.8	477.4	412.7	503.1	357.1		319.7	329.4	404.7	322.6	270	438.2	399.1	312.5
10.45	327.7	292.1	295.1	304.3	477.9	412.1	496.1	369.1		318.2	324.7	405	303.1	259.6	425.1	399.9	318.1
10.4667	317.6	301.5	298.5	301.5	479.7	425	491.7	371.6		327.5	323.2	365.2	303.9	266.9	444.9	381	325.8
10.4833	317.9	292.4	299.8	301.1	469.6	427.6	491.1	358.1		314.1	312.7	378	312.6	265.3	441.5	389.6	333.8
10.5	313.7	294.7	286.1	321.8	458.7	419.3	491.9	361.5		333.9	298.3	404.8	308.6	265.9	429.8	395.1	323.6
10.5167	314.8	295	292.9	320.2	481.4	418.2	485.9	363.7		327.9	315.3	432.6	316.7	272.9	424.8	383.8	322.2
10.5333	333.1	297.6	320.7	307.1	483.7	427.5	497.2	360.5		329.7	314.2	423.4	317	262.6	437.1	403.9	335
10.55	374.5	294.5	363.3	307	485.7	437.4	494.4	367		319.6	307.1	375.5	315.3	267.3	436.1	410.9	332.4
10.5667	382.7	293.2	383.8	291.4	486	419.8	494.9	366.1		323.4	315.7	442.5	328	262.7	447.3	404.9	325.1
10.5833	390.7	296.5	318.3	298.8	484.3	420	490.7	357.4		315.3	305.6	441.2	303.8	267.3	444.4	387.7	330.2
10.6	384.9	296.1	321.5	312.8	479.7	420.9	495.3	353.6		328	305.1	395.2	307.4	268.8	444.1	410.4	320.5
10.6167	365.1	297.7	344.4	332	473	426.2	488.1	350.5		315	311.1	400.2	309.7	274.2	427.6	390.2	334.8
10.6333	333.9	301.4	310.3	323.4	479.9	428.6	496.7	359.6		331.4	308.4	387.9	308.2	270.6	431.4	402.1	327.2
10.65	327.1	295.9	302.3	303.2	467.9	422	502.1	354.8		313.8	318.4	397.5	304.6	269.2	422.4	391.6	327.9
10.6667	316.6	296.8	317.6	313.4	468.8	414.2	493.4	351.5		313.1	314.6	420.4	318.8	269.9	441.9	389.4	334.9
10.6833	313.5	303.9	339.6	310.5	485.4	422.7	495.6	356.3		323.4	309.8	390.7	309.5	270.9	447.2	385.6	322.9
10.7	316.5	298.8	336.5	298.8	481.6	431.6	502.9	363.8		340.3	319.5	373.7	308.2	269.3	447	390.3	333.4
10.7167	328.2	296.4	357.7	299	474.2	425.9	501.3	351		329.7	313.9	418.9	309.8	275.1	429.7	401.3	324.4
10.7333	359.2	293.5	354.5	310.2	473.2	430.3	501.9	357.1		334.3	315.7	451.8	299.6	270.7	426.5	393.3	333.6
10.75	382.4	295.7	313.4	326.5	474.8	421.4	497.7	357.9		328.8	323.7	431.2	303.4	276.1	424.3	404.3	329.6
10.7667	395.9	299.4	309.6	311.4	475	421.9	499.7	340.7		331.6	325.7	409.4	318.6	273.4	439.6	412.7	325.6
10.7833	390.8	293	297	303.3	474.1	418.5	504.3	358.3		329.3	327.7	395.2	308.6	274.8	438.2	418.1	332.9
10.8	342.6	304.2	312.6	297.8	472.3	415.5	498	365.8		310.9	318.4	438.3	307.2	274.1	439.8	408.5	322.6
10.8167	325.6	300.6	349.3	306.6	462.5	420.3	491.9	360.8		322.2	312	413	319.1	269.7	433.9	410.7	324.7
10.8333	316.4	294	326.6	337.2	470.7	410.5	497.2	353.2		310.8	313.7	381	305.2	281.2	433.1	386.7	332.7
10.85	307.4	302.7	338.2	312	479.6	411.8	500.5	361.7		320.5	316.6	399.2	316.3	277.6	427.8	378.3	329.5
10.8667	315.7	304.7	357.9	316.3	475.6	419.8	493.1	354.2		319.2	302.2	385.2	322.1	276.2	439.2	397.9	334.3
10.8833	349.7	301.5	316.5	318.6	475.9	423.4	494.7	358.3		327.7	313.3	411	317.7	282.1	445.9	401.4	329.7
10.9	375.9	302.8	295.3	301.7	473.4	423.9	501	363.2		328	308.7	426.6	321.4	276.8	456.4	389.8	321.3
10.9167	390.7	301.2	306.3	310.6	470.5	428.3	488.9	344		330.6	316.7	406.2	318.5	276.1	449.1	398.6	322.8
10.9333	381.4	295.8	319.9	330	475.3	431.5	501.1	361.3		328.4	323	387.9	316.3	275.2	425.7	388.6	312.6
10.95	332.6	295.1	346.8	318.8	465.5	436.3	496.7	349.8		332.4	310.9	388.8	322.1	272.4	432	391.5	323.3
10.9667	328.6	304.5	372.9	317.2	473.7	436.9	484.9	356.9		336.4	315.3	404.5	315.1	276.4	417.3	400.6	321.3
10.9833	323.8	297.2	355.7	314.4	480.9	430.1	481.5	372.5		321.4	319.4	450.8	322.8	277.8	436.1	393.2	316.7
11	316.2	297	312.7	318.4	464.6	428.3	498.4	356.5		328.8	315.6	414.7	321.2	280.6	449.8	387.8	321.3
11.0167	326.4	297.9	304.3	308.5	476.2	426.3	496.3	366.4		329	323.7	415.8	315	272.3	455.2	394.9	315.9
11.0333	357.2	309.2	305.8	306.3	463.1	442.5	498.6	363.5		322.9	320.5	448	307.2	273.8	456.8	392.4	325.5
11.05	382.1	300.4	319.8	313	469.1	427.4	501.5	349.2		321.3	318.3	397.8	317.4	283.5	450	400.7	318.1
11.0667	388.1	302.6	328.6	333.7	469	418.4	503.7	341.2		325.4	312.9	404	307.5	281.3	421.5	399.2	328.4
11.0833	394.9	305.5	319.4	329.6	477.6	414.6	498.8	361.8		327.6	322.5	402.3	318.3	280.2	437.5	387.8	316.8
11.1	371.6	311.1	322.5	310.1	464.1	425.3	497.2	349		330.5	313.4	412.4	331	284.3	438.8	383.6	324.8
11.1167	332.2	301.5	316.9	318.7	474.4	426.8	496.2	362.8		317.1	321.7	459.6	323.2	281.5	438.1	381.4	331
11.1333	329.4	295	314.4	317.2	479.2	422.6	484.8	356.1		328.3	321.1	420.2	321.3	288	441.5	401.8	321.5
11.15	321.3	307.1	303.7	323.1	484.2	436.8	496.2	343.9		323.7	303.7	393.2	323.6	280.2	448	399.4	319.3
11.1667	320.2	300.1	295.3	304.9	470.2	430.1	508.1	356.1		322.2	310	404.3	317.9	279.2	428.1	404.2	313
11.1833	316.6	302.6	310.6	311.9	472.6	442.1	494.2	357.7		322.9	307.4	429.1	319.7	284.2	442.7	379	315.6
11.2	340.3	301.2	304	331	468.6	430.8	489.7	356.2		342.9	310.5	494.7	301.8	282.3	432.6	400.6	328.9
11.2167	372.9	306.2	326.5	340.5	475.9	426.6	500.3	362.9		328.3	313.5	495.8	323.6	282	441.6	406.1	322.9
11.2333	395.5	301.7	319.1	315.9	468.2	426.1	506.1	365.6		335.8	313.1	425.9	311.8	278.5	449.7	397.4	323
11.25	366.5	299.4	304.3	314.3	472.4	432.1	507.7	352.1		322.1	325.1	451.1	316.3	275.5	443.9	397.9	312.6
11.2667	334.9	307.7	311.8	311.4	466	434.6	496.7	364.1		344.5	324.2	432.9	321.2	282	439.7	398	319
11.2833	316	296.7	299	319.7	479	433.2	499.6	370.1		327.6	323.2	437.3	325.4	282.9	422.7	391.9	315.5
11.3	323.8	297	323.2	311.3	467.8	431.3	499.9	365.7		325.4	328.2	399	316.4	283	432.5	393.7	323.7
11.3167	316.2	302.2	367.1	310.2	471.4	438	489.6	351.3		314.7	323.7	422.3	316.1	289.9	447.6	402.6	327.4
11.3333	334.2	312.4	385.2	316.9	473.7	448.4	500.3	354.5		334	326.6	391.8	329	285.7	447.9	385.7	311.5
11.35	371.2	299.9	339.2	330.8	477.4	434.2	507.8	371.4		333.1	325.2	369.5	315.2	292	449.7	385.1	321.4
11.3667	384.9	297.4	309.6	334.4	461.5	425.4	495.9	354.6		336.5	324.2	411.4	312.4	291.1	446.5	383.3	315
11.3833	389.3	299.6	321.2	322.8	471.4	435.4	497.7	370.5		321.4	328.3	394.6	321.6	282.4	427.9	408.1	319.3
11.4	388.2	305.1	329.7	316.1	475.4	444.6	502.3	384.8		339.2	324.6	442.5	321.9	289.8	448.7	415.8	321.6
11.4167	353.4	299.8	335.1	308.2	478.5	427.6	494.3	379.8		337.3	318.9	451.6	318.5	285.7	433.4	409.9	315
11.4333	331.4	302.6	302.2	334.8	468.6	438.3	501	406.8		332.7	309.5	400.9	319.8	288.5	429.6	408.3	324.5
11.45	327.6	310.7	314.1	335	473.3	439.8	509.6	385.4		317.4	307.3	424.3	324.3	290.7	448.1	418.4	307.6
11.4667	317.6	300.6	326.1	322	482.5	438.2	507.4	380.7		336.1	302.7	413.7	324.9	283.2	429	406	321.8
11.4833	317.1	308.7	342.4	324.6	477.8	439.8	498.4	355.9		330.8	312.5	443.4	319.8	283.9	432.5	399.9	320.2
11.5	311.8	312.4	324.8	312.8	478	429.6	497.2	368.1		317.1	325.9	417.1	321.7	282.3	435.5	406	320.9
11.5167	308.5	304.3	299.9	328.5	466.8	436.9	497.9	362		328.3	316.5	385.9	326.3	282.9	438.5	404.3	325.3
11.5333	326.2	299.7	313.8	332.4	463.5	432.7	493.7	361.1		322.8	315.2	417.1	332.1	288.2	437.2	411.8	318.1
11.55	367.5	301.7	342.5	322.5	475.2	445.1	500	361		330.8	321.1	452.5	315.6	287.2	437	393.8	321.5
11.5667	395.6	306.3	319.6	318.6	463.8	441.5	500	377.4		324.1	322.7	428.7	322.9	287.9	447.4	397.4	312.4
11.5833	390.8	292.2	312.2	313.8	472.6	434.2	509.5	356.3		333.5	324.7	400.4	333.4	294.9	431.5	407.4	317.2
11.6	412.6	301.5	341.4	311.4	479	437.5	496.1	365.6		321.8	332.7	392.3	321.8	286.3	422.4	394.1	323.1
11.6167	398.2	300.2	308.2	308.5	474.7	418.9	499.5	365.1		338.4	324.3	466.4	320.2	289.5	431.6	397.5	312.6
11.6333	383.3	294	301.1	315.8	480.1	400	489.6	353.8		338.9	324.9	480.8	320	294.3	428.5	403.1	320.7
11.65	351.9	298.3	319.2	341.1	480.9	387	498.6	366.9		319.1	322.4	403.1	326.1	288	433.3	418.6	327.9
11.6667	324.3	298.9	318.2	329.8	473.2	371.4	500.7	349.7		333.7	323.8	450.6	312.2	295.8	448.6	410.3	331.4
11.6833	321.4	312.8	331	316.1	462.7	359	495.8	364.7		328.8	328.3	392.1	321.5	289.1	430.8	403.1	322.4
11.7	321.9	299.1	337.9	312.6	477.7	349.5	507.2	355.4		330.7	328.9	387.7	318.5	288.1	431	403.9	321.2
11.7167	319.4	304.2	310.3	319	474.5	347.3	490.6	355.9		310.2	325.5	413.9	331	288	433.6	396.2	319.3
11.7333	326.8	308.4	302.3	340.6	463.7	345.3	492.7	364.6		335.1	314.7	463.3	318.9	281.1	439.1	386.5	320.8
11.75	350.3	299.4	318.5	317.6	483	354.6	498.1	372.7		328.1	325.3	438	314.7	284.5	439.9	400.8	317.5
11.7667	382.9	294.7	312.9	313.6	476.1	352.3	498	350.5		324.6	324.2	410.3	329.7	290.1	449.5	409.6	325.7
11.7833	396	302.7	302.6	313.9	471.7	376.3	498	364.8		333.6	318	411.8	318.7	290	453.4	393.5	319.9
11.8	351	310.7	313.3	326.1	478.9	411.5	498	365.8		328.8	314.5	450.9	316.4	291.7	446.1	392.2	326.9
11.8167	320.7	303.2	327.7	332.9	481.6	413.7	492.8	375.5		329.8	324.4	406.9	323	300.6	436.5	405	327
11.8333	316.6	306.5	360	333	485.4	435.6	492.1	378.5		336	320.6	400.9	328.2	294.9	449	398.9	329.6
11.85	314.4	306.1	358.3	330.4	472.1	452.4	500.7	374.6		327.4	320.1	418.3	319.4	300.2	455.9	405.9	323
11.8667	308.9	312.9	320.9	326.6	470.3	461.6	494.9	378.4		349.5	321.7	398.2	323.4	300	439.6	410.3	326.5
11.8833	334.1	306.1	320.1	318.3	482.1	457.6	488.1	398.8		329.2	317.6	412.7	332.6	287	428.7	395.3	322.6
11.9	374.6	303.4	320	311.1	481.2	462.3	494.9	374.8		332.5	320.5	447.5	328.6	290.5	435.9	400.2	315.2
11.9167	390.5	310	306.2	334.4	465.5	458.6	494.1	380.2		326	338.2	431.5	321.2	297.8	450.7	403.5	320.2
11.9333	392.7	308.3	303.4	332.3	484.1	452.9	507.9	377.4		335.5	335.4	397.3	336.6	295.4	445.8	403.9	314
11.95	367	304.6	324.7	326.9	484.9	439.2	495.9	362.4		327.3	324.7	397	324	295.1	436.5	393.6	323.5
11.9667	329.8	308.4	334.5	321.8	482.4	413.1	495.1	378.5		328.8	318.9	403.1	323.1	293.3	442.1	398.3	319.6
11.9833	332.6	303.7	350.5	311.6	469.1	395.7	500.2	374.6		324.6	325	435	317.8	289.6	437.7	395.4	323.4
12	321.7	300.5	312.9	311.9	473.3	385.6	511.3	386.2		340.5	328.5	384.8	311.1	289.9	493.3	395.9	316.1
12.0167	330.6	309.6	315.6	316.3	485.2	374.7	501.5	378.2		330.6	318.6	405.7	319.7	301.2	462.8	408.1	313.4
12.0333	327.5	315.1	318.5	338.5	481.6	361.1	496.7	375.4		337	318.9	431	323.4	295	436.2	405.4	321.7
12.05	345.2	306.4	327.6	338.1	469.8	351.5	493.5	378.5		336.1	321.6	456.9	323.9	301.9	445.5	408.5	318.5
12.0667	376.2	306.1	374.6	331.1	474.3	371	505.2	366.8		309.2	321.9	410.3	324.9	303.7	442.5	396.8	319.8
12.0833	389	306.9	388.8	362.1	493.9	349.4	496.4	355.7		335	328.9	455	336.2	300.5	436	408.2	326
12.1	346.6	313	334.5	348.2	489.7	369.8	490.9	358.6		327.2	341.1	419.5	336.9	296.6	430.8	408	317.4
12.1167	334.8	302.6	321.1	322.9	477	385.5	491	358.9		340	328.9	429.5	330.1	304.7	433.6	421	322.2
12.1333	319.4	301.2	330.5	314.3	471.8	412.7	492.7	352.1		339.1	320.3	417	333.5	296.3	440	397.7	313.4
12.15	315.6	314	326.6	312.3	484.1	434.6	501.6	362.4		336.4	327.8	404.9	335.7	294.3	478.9	399.7	318.2
12.1667	315.1	320.1	339.1	331.9	474.5	455.7	499.4	362.9		323.1	324.5	443.9	335.1	301	425.4	405.1	320.6
12.1833	325.4	316.5	333	344.1	476.7	452.5	506.8	369.9		336	331.9	428.4	320.3	294.9	417.3	414.5	321.8
12.2	355.3	307.4	320	331.9	472.6	465	493.1	359.6		336	333.7	389.1	338.2	302.8	422.2	392.5	320.2
12.2167	379.3	312.2	324.3	324.2	479.9	467.6	499.1	379.8		348.1	330.5	401.1	320.7	300.4	410.8	400.7	317.4
12.2333	394.6	306	338.7	319.7	471.3	443.7	501.6	362.7		335	324.9	396.7	322.7	292.3	424.8	395.8	323.1
12.25	388	300.8	339.8	325.1	478.8	456.1	502.8	369.9		343.7	334.5	404.7	319.5	303.3	431	396.8	322.2
12.2667	383.7	310.5	310.6	337.1	479.8	437.9	497.8	343.2		331.8	327.1	456.8	326.8	302.2	403.3	402.2	328.9
12.2833	384	313.5	308.3	319.7	476.5	447.5	491.1	365.5		333.7	333.9	409.4	329.6	305.5	429.8	407.2	327.3
12.3	387.5	309.6	326.2	318.2	470.9	443.6	504	392.7		326.2	330.5	395.2	317	309.4	435.2	411.4	321
12.3167	400.9	307.4	358.9	324.9	480.5	456.1	498.8	370.5		333.8	311.9	426.2	322.2	296.9	399.6	412.8	321.9
12.3333	382.8	312.2	373.7	338	480.9	446.5	493.8	379.6		329.7	321.5	458	328.9	293.5	422.4	408.6	318.5
12.35	389.9	314.6	375.7	338	488.8	444.3	496.6	377.3		317.8	323.7	477.9	331.6	305.2	423.8	402	323.3
12.3667	344.2	303.7	333.6	322.4	480.3	453.6	494.3	383.1		335.3	313.6	414	322.4	297.2	405.8	414.1	323.9
12.3833	336.2	306.6	332.2	329.8	484.4	453.1	499.2	377		325.5	314.8	427	325.5	295.3	442.3	408	326.6
12.4	325.7	306.9	317.3	330	479.7	459.1	496.4	388.2		338.9	322.8	410.6	317.3	300.2	421.3	395	324.3
12.4167	320.8	305.3	322.2	312.7	466.1	445.2	493.5	373.3		334.7	316	395.4	321.4	300.9	414.1	385.5	329.2
12.4333	318.4	304.2	357.5	325.1	479	451.9	492.2	355.8		352.2	325.5	453.8	315	307	425.3	398	324.7
12.45	328.4	310.9	338	327.6	474.7	439	500.7	355.1		322.6	329.4	466.1	322.8	313.1	421.6	417	325.8
12.4667	380.8	311.9	321.6	327.1	473.2	442.5	494	356.7		337.6	330.8	396.8	323	300	415.9	409.2	317.3
12.4833	390.5	306.8	308.1	334.8	471.3	432.6	510.4	362.2		327.6	325.8	405.6	330.8	297.4	435	408.2	327.4
12.5	359.8	304.4	312.3	328.1	474.5	440.7	504.9	359.4		321	330.3	424.1	331	307.4	436.7	414.9	314.1
12.5167	342.7	307.5	320.7	340.1	477.5	413.3	502.4	369.4		315.8	330.9	418.8	334.5	308.8	427.5	409.8	323.5
12.5333	328.3	298.4	354.7	316.7	472.7	387.1	496	365.6		328.9	326.7	406	330.6	309	439.2	417.8	317.9
12.55	335	301.5	381.8	324.7	475.6	375.8	500.3	356.4		331.6	333	425	333.5	303.8	425.2	404.1	323.2
12.5667	321.2	301.9	376.8	328.4	482	361.3	493.1	344.8		331.9	330.4	456.1	325.3	299.7	419	395.4	328.2
12.5833	341.8	313.2	332.9	321.1	474.2	373.1	490.4	368.3		338.9	327.5	436.1	323.3	298.2	441.5	403.7	327.2
12.6	376.6	312.2	326.9	339.2	473.2	352.3	506.5	387.9		353.7	330.5	398	325.6	310.1	408.2	400.5	332.2
12.6167	395.1	301.6	324.4	339.9	478.2	338.2	494.8	357.7		342.7	325.7	455.9	323.4	303.1	438.3	391.4	318.2
12.6333	363	310.6	341.3	336.5	487.5	359.6	495.8	396.9		354.2	321.6	412.8	320.5	299.6	430.3	384.1	326.7
12.65	331.9	304.9	362.7	363.7	472.4	346.1	494.2	377.1		355.8	318.5	425.1	329.6	309.5	419.7	397.9	328.7
12.6667	309.5	305.9	335.3	327.6	482.4	348.6	507	372.7		334.4	318.1	409.4	331.7	302.1	454.5	403.2	318.6
12.6833	312.5	307.7	352.3	315	488.1	370.6	506.1	358.3		341	315.4	375.3	326.8	301.2	432.5	403.9	328.5
12.7	311.2	314.9	349.5	315	488	357.1	502.6	352.8		333.2	311.6	439	327	307.9	436.4	407.4	326.3
12.7167	316.2	306.3	343	319.3	474.2	351.8	503.8	360.8		334.8	326.6	442.5	331.3	302.8	430	410.5	330.4
12.7333	328.1	306.9	317.9	332	477.5	359.8	499.7	357.5		330.6	320.9	456.8	334.5	306.4	410.1	404.9	323.1
12.75	365.2	306.1	310.2	343.2	472.7	349.6	497.4	358.8		334.4	327.9	398.2	331.5	308.7	445.5	395.5	329.9
12.7667	385.8	314.7	310	346.5	488.5	367.2	492.7	360.7		314.2	327.1	416.2	333.7	303.8	434.7	408	329.1
12.7833	347.9	302.8	342	334.8	476	396.4	493.8	367.9		343.4	319.2	388.4	333.1	300.5	415.1	414.9	321.2
12.8	331.6	302.1	329.9	330.7	487.2	417.7	494.8	369.7		330.1	327.7	434.7	325.2	312.2	449.6	405.5	325.4
12.8167	333.7	301.2	323.9	313.7	487	452.5	495.8	375.1		336.1	323.6	428	327.6	307.7	420.5	394.7	321.6
12.8333	323.6	305.3	329.2	317.4	479.2	449.5	497.7	358.6		332.6	324.8	382.2	329.7	304.5	434.8	395	328
12.85	315.3	306.8	319.5	332.6	472.1	476.7	503.1	355.5		345	329.3	409.7	317	309.3	432.4	396.7	318.5
12.8667	309.9	309.6	360.6	329.5	473.7	472.6	503	364.6		332.9	329	434.2	318.7	303.8	395.7	394.4	322.4
12.8833	323.8	305.6	367.9	339.4	477.4	478.1	497	377		345.1	341.1	446.1	325	303.1	428.8	378.5	325.5
12.9	351.6	298.2	326.5	324.4	475.3	488.4	510	371.8		333.8	335	417.5	325.9	308.2	446.3	397.1	328.5
12.9167	385.7	306.7	324.3	314.5	482	491.5	503.1	370.2		335.7	323.8	406.7	329.4	303.7	436.5	393.6	328.9
12.9333	402.4	301.8	342.2	320.1	463	482.4	496.1	382.1		323	313.6	407	333.4	306.6	421.4	409.5	324.7
12.95	398.6	308.9	355	342.5	469	474.3	499.5	363.9		329.9	318.3	452.8	325.3	309.5	439.2	396.1	335.3
12.9667	375.6	302.1	317	350.7	470.7	456.7	500.8	359.7		339.5	309.4	472	328.5	310.8	453.7	402.9	329
12.9833	342.2	300.3	318.7	328.5	485.7	446.6	497.5	379		327	322.9	447.8	367	313.6	415.1	396.1	327.3
13	328.2	303.5	334.5	333.3	482.5	468.6	500.5	379		350.3	316.1	412.5	379.1	312.2	428	397.7	322.7
13.0167	320.2	304.8	364.3	328.7	467.4	489.7	501.8	379.9		331.9	309.1	389.6	389.4	311.2	440.1	388.5	317.8
13.0333	319.2	297.2	377.9	337.6	482.6	453.6	496.8	358.4		351.9	326.3	396.9	354.5	310.2	412.3	395.8	326.6
13.05	313.8	299.6	328.7	346.6	483.8	457.4	501.3	367.6		340.7	328.6	401.3	336.8	308.3	432.8	386.5	320
13.0667	319.2	299.9	320.3	331.4	478.8	451	513.1	377.5		338.4	322.9	432.2	339.6	301.1	442.5	391.3	327.8
13.0833	317.3	304.3	316.6	327.6	466	439.8	513.9	379.7		348.4	330.8	450.2	323.5	301	441.2	402.3	321.1
13.1	317	304	323	323.6	470.3	447.7	511.4	358.3		339.4	338.8	383.4	323.1	307.1	411.6	394.3	324.5
13.1167	313.5	304	352.4	330.9	484.7	449.7	508.5	366.7		329.5	331.2	393.4	332.5	310.5	431.8	393.2	324.1
13.1333	329.5	310.1	335.6	346.5	473.7	450	511.5	368.7		336.9	330.2	451.9	326	317	445.8	409.5	329.2
13.15	361.1	309.1	317.8	341.8	485.2	446.5	505.9	370.7		337	329.2	468.4	326	315.3	409.7	413.4	324.7
13.1667	379.2	297.8	342.2	331.6	469.5	457.3	497.3	380.5		333.5	327.3	426.6	332.9	317.6	428.1	398.4	324.1
13.1833	384.2	294.5	321.3	328.5	475.1	447.5	504	368.8		344.3	331.4	417.4	330.4	319.7	435.8	416.2	318.8
13.2	328.7	303.6	315.8	322	482.8	445.3	504.9	352.5		321.6	315.5	422.2	320.5	318.2	413.5	401.3	325
13.2167	318.6	305.7	323.8	339.3	480.4	439.9	506.7	358.1		343.6	315.1	409.9	325.3	311.1	426.9	390.7	326.7
13.2333	320.7	297.3	312.7	322.6	481.8	443.4	494.9	353.7		338.8	331.4	416.9	326.8	308.4	446	390.1	316.6
13.25	321	296.2	334.6	328.1	485.4	456	492.4	360.9		344.2	319	425.6	318.3	308.9	433	390.9	322.1
13.2667	338.3	302.9	336.7	333.2	481.6	449.1	498.1	367		331.1	321.6	407.8	328.4	312.4	417.4	397.9	318.6
13.2833	374.4	296.9	318.8	326.1	469.8	452.5	504.9	368.7		344	309.8	391.5	330.7	312.9	429.2	401.4	325
13.3	387.9	301.3	344.9	332.9	486.4	470.2	504.1	362.9		331.9	316.9	417.9	327.5	314.7	435.9	403.7	328.5
13.3167	387.1	295.9	377.8	337.3	478.3	463.1	496.2	364.7		332	323	444.8	324.5	314.1	424.8	402.2	326.3
13.3333	330.8	297.7	375.4	322.3	482.4	457.8	501.2	368.4		325.9	320.4	408.7	330.1	320.1	426.7	394.2	331.2
13.35	319.7	300.6	321.4	329	484.6	454.5	497.6	365.5		328.6	331.3	393.4	334.3	314	459	389.7	326.7
13.3667	322.6	303.5	323.7	340.2	484.1	438.5	505.7	372.8		330.7	322.4	412.9	319.3	314.9	439.1	388.2	329.6
13.3833	316.9	302.2	330	346.9	490.1	452.8	498.2	366.9		339.6	322.1	453.6	325.1	306.3	428.6	394.9	320.4
13.4	310.9	302	357.7	327.1	481.4	453	506.7	372.2		337.4	335.8	414.2	325.9	309.5	431.5	400.2	321.8
13.4167	308.4	300.3	346.7	329.6	480.2	451.3	497.4	369.4		332.7	326.5	409.7	325.1	309.9	436.3	385.3	314.2
13.4333	322.8	294.8	323.6	330.8	480	451	502.2	372.5		350.3	322.6	416.9	325	313.4	417.9	398.9	317.5
13.45	355	300.2	343.8	338.8	487.8	457.9	511.5	361.7		328.4	318.6	397.1	319.8	314.8	412.8	386	323.1
13.4667	380.9	306.1	326.7	326.9	483.6	453.7	505.9	366.3		341	316.4	416.9	326.9	309.8	432.9	381.7	324.7
13.4833	376.7	297.4	330.4	324.4	476.2	452.2	515.5	362.6		344.5	338.5	457.6	335.6	316.9	444.2	385.4	334.5
13.5	335.5	298.8	320.5	331	487.3	452.9	504.7	364.7		324.2	335.5	400	323.8	316.1	417.2	381.6	328.9
13.5167	322.1	300.7	315.8	345.7	494.8	453	499.8	358.9		339.6	321.2	403.5	334.4	311.7	430.9	398.4	327.3
13.5333	318.6	312.2	324.6	320.9	502.8	451.3	495.6	377.1		321.8	321.9	436.8	329.7	312.8	445.7	395.5	332.2
13.55	314.6	312.9	334.5	323.6	490.9	459.7	502.9	363.2		339.3	320.3	439.6	322.2	309.5	436.4	389	317.3
13.5667	308.9	308.7	346.2	326.5	473.7	447	490.9	363.9		337.3	320.9	395.8	322	314.3	426.5	392.5	328.3
13.5833	326.3	304.6	329.6	346.8	488.7	455.6	493.6	358.8		324.1	320.1	389.9	332.4	314	443.4	402.4	327.2
13.6	361.5	305.8	317.8	323.6	478.6	453.4	494.8	361.6		342.2	323.5	406.4	323.4	313.1	439.6	406.4	320.1
13.6167	386.1	308.6	330.1	326.5	493.6	466.9	501	368.9		330.8	314.4	400.9	322.2	313.9	452	404.3	326.9
13.6333	362.7	299.4	316.2	335.6	492.2	454	501	357.7		337	314.9	410.5	333.3	309.7	428.7	398.9	320.9
13.65	323.2	304.2	309.1	324.7	489.4	451.4	494.9	360.6		343.1	333.1	383.3	329.6	312.5	434.1	400.7	327.9
13.6667	318.7	302.3	308.1	356.1	489.9	458	509.7	375.6		334.4	336.5	440.1	317.8	315.5	456.5	404.4	322.8
13.6833	308.6	299.4	326.2	372.4	483.9	452.8	509.1	382.9		321.9	339.5	405.4	331.8	313.3	450	392	331.6
13.7	308.1	297.3	380.5	343.5	477.1	447.8	506.4	386.4		337.6	331.3	389.5	340.6	313	427.5	392	325.9
13.7167	308	301.4	406.9	328.4	492.6	451.4	495.7	358.4		332.8	336.2	429.7	329.7	309.5	429.7	396.3	322.5
13.7333	334.8	312.3	343	309	476.5	440.7	504.6	364.1		326.9	330	453.3	328.2	311.7	429.1	374.4	324.7
13.75	368.7	303.4	330.9	314.2	483	447	497.2	351.9		337.4	331.7	460.8	338.4	318.9	442.8	402.6	318.9
13.7667	368.1	301.3	327.5	317.5	484.7	456.5	497.9	356.3		319.8	319.9	402.2	327.7	310.3	428.3	394.3	328.5
13.7833	333.4	305.4	319.3	337.8	484.1	439.6	498	362.1		345	318.3	418.5	325.4	320.4	433.2	403.6	333.3
13.8	333.1	318	325.1	339.7	484.9	445.1	489.4	376.7		335.5	323.2	403.4	327.6	322.7	431.3	399.6	337.4
13.8167	313.1	313.7	367.4	346	483.3	454.5	499.4	373.5		334.2	326.5	422.9	328	319.5	447.5	400.8	326.7
13.8333	312.2	299.3	334.2	330.4	482.2	444.6	489.5	357.5		328.8	322.6	448.1	326.3	313	461.8	399.2	321.8
13.85	312.9	299.9	311.5	324.9	480.3	453.6	499.4	355.3		335	322.9	452.3	334.7	310.4	430.8	399	325.4
13.8667	324.2	306	324.9	326.7	478.3	457.4	499.9	361.1		318.6	324.7	405.4	337.6	308.3	416.3	378.3	321.6
13.8833	358.6	315.5	333.6	323.5	495.3	452.7	500	359.3		341.4	320.6	387.8	325.8	311.5	430.7	376.3	332.3
13.9	378	308.2	346.1	342.1	482.9	446	496.5	351.3		335	321.8	395.7	331.2	316.3	435.3	388.1	329.4
13.9167	379.7	302	314.9	350.7	487.3	438.2	503	356.2		337.6	323.7	419.3	334.5	317.8	441.1	394.9	332.5
13.9333	349.7	297.7	352.2	332.8	477.5	454.5	494.4	368.1		329.3	324	443.3	334.9	317.1	432.4	389.8	336.4
13.95	326.6	307.5	346	320	490	454.1	494	360.2		352.4	324.9	383.4	322.9	322.2	437.2	393.4	326.5
13.9667	322.6	309.7	332.2	330.4	484	451.4	494	366.9		329.6	330.2	398.6	323	322.9	455.2	394.8	332.1
13.9833	316	303.9	359.7	346.5	473.6	438.1	493.1	362.7		339.5	339.5	397.2	330.8	318.7	436.9	401	324.2
14	311.7	304.9	325.4	320.1	480	444.1	495.6	349.1		341.7	326.1	445.5	318	314.6	427.5	406.2	322.3
14.0167	308.5	311	314.7	324.3	479.1	446.6	494.2	359.4		324.7	325.1	463.2	324.1	308	419.3	393.1	329
14.0333	314.1	311	319.3	332.7	487.7	450.4	500.1	359.1		337.1	325	399.9	328.3	311.5	437.2	402.5	319.5
14.05	324.4	304.1	324.2	352.8	482.8	447.5	494.8	355.5		334.4	314.6	402.6	330.6	323.2	447.4	391.7	329.4
14.0667	358.6	297.1	369	323.6	484.7	444.5	495	368.9		339.2	309.8	419.4	330.1	318.7	426.3	391.1	317
14.0833	381.4	299.6	393.2	330	483.2	451.8	493.3	366.4		331.3	312.6	445	322.2	315.5	434.7	393.6	324.8
14.1	370.7	301.7	377.5	323.9	491.7	448.5	499.1	370.4		336.2	319	464	335	322	436.7	399.1	324.1
14.1167	333.8	305.4	334.7	328.3	488.5	436	498.1	359.7		333.4	322.5	395.7	327.2	324.6	442.1	386.9	326.6
14.1333	321	298.1	325.4	321.1	487.2	451.6	499.7	362.6		327	316.9	395.1	330.5	315.4	429	397.4	329.5
14.15	308.9	300.6	313.8	343.5	470.6	449.3	508.6	358.6		332.2	330.8	428.7	328.3	319.4	431.6	398.8	330.8
14.1667	307.3	304.4	346.8	339.6	483.1	455.1	516.7	358.9		329.4	329.2	460.1	337.6	319.1	425	398.1	325.8
14.1833	307.9	304.9	363.4	333	485.6	447.2	497.1	357.3		345.5	331.6	430.6	333.6	308.6	428.5	393.7	322.5
14.2	310.6	313.6	344.9	332.1	482.5	441	495.3	363.1		326	323.3	409.3	333.9	315.9	436.7	406.1	322.1
14.2167	305.8	313.1	368.3	332.9	467.4	479.9	492.4	368.2		339	334.3	388.3	334	314.3	446.5	403.4	323.7
14.2333	314.6	305.2	378.4	327.8	485.2	463.6	497.2	368.9		335.5	334	388	337.5	318.4	434	400.5	321.4
14.25	314.1	298.1	333.1	343.5	499.7	439.7	494.4	367.3		342	323.6	401.8	326.7	315.5	427.1	399.2	321.1
14.2667	325.3	307.5	323.5	362.1	502.6	448.6	494.1	368.8		326.4	318.8	393.3	328.7	322	435.7	395.6	322.7
14.2833	342.3	312.3	326.5	337.8	490	455	492.3	362.9		343.4	323.3	438.9	322	321.1	447.2	397.7	331.6
14.3	374.9	306	329.5	336.2	482.2	442	499.8	363.9		319.7	330.8	452	325.5	317.6	434.9	401.4	319
14.3167	389.7	306	323	336.9	471.7	453.2	513.8	370		340.7	319.7	412.2	326.8	315.3	422.9	398.5	325.9
14.3333	352.8	304.3	341.2	340.4	474.5	444.4	509.7	367.4		334.9	314.8	393.9	328.7	319.4	420.4	388.6	320.8
14.35	327	308.4	323.7	353	484.5	447.5	503	375.7		322.9	315	441.5	339.3	317.3	433.9	384.6	324.4
14.3667	315.8	310.6	324.8	326.2	473.7	447.1	505.6	366.4		339.4	316.7	423.8	331.3	319.6	443.5	385.8	324.9
14.3833	315.1	314.4	335.4	332.1	486.1	438.4	504.2	373.8		317.4	323.9	464.6	331	323.4	455.2	391.2	325
14.4	322.8	303.7	346.3	340.7	479.1	433.7	500.6	357.6		342.1	319.7	452.8	331.9	323.9	430.8	392.8	328.5
14.4167	330.8	300.5	314.9	336.6	483.3	427.9	495.8	370.9		340.3	315.6	434.8	335.4	320.5	424.9	397.3	321.1
14.4333	372.5	305.3	310.7	330	485.6	435.8	498.6	359.7		342.6	320.3	418.5	324.7	320.1	428.4	402.2	325.3
14.45	395.4	307.6	338.6	324.8	483.4	436.8	505	366.9		333.4	333.9	403.4	326.7	321.7	435.8	403.8	328.5
14.4667	389.9	302.8	386.5	331.9	490	433.5	499.8	368.7		342.6	329.7	402.2	324.4	313.3	422.1	404.8	324.6
14.4833	337.2	303	349.8	333.7	493.5	439.1	488.7	360.3		321.3	326.5	386.5	324.9	306.1	417.7	409.3	323.2
14.5	330.1	303.9	326.6	335.7	488.7	439	505.4	363.5		338.3	335.6	413.7	325.9	319.9	436.1	404.7	322.2
14.5167	324	304.8	341.6	325.6	486.4	453.7	500.7	375.2		335.5	327.3	441.6	327.7	319.1	425.6	389.4	322
14.5333	318.8	312.8	369.6	332.9	480	445.3	497.5	376.8		330.7	334	456.6	329.7	327.7	436.3	389.9	322
14.55	318.1	306.1	360.4	346	482.6	458	498.8	359.7		342.2	332.3	410.3	334.3	320.2	444.7	382.2	323.7
14.5667	318	305.1	326.3	337.3	489.9	445.9	502.4	359.1		319.5	319.9	400.5	332.3	320.9	438.9	404.5	324
14.5833	331	299.8	326	328.4	481.3	455.5	493.4	382.4		348.5	308.7	421.7	333.8	314.9	442.4	397.2	326.6
14.6	373.4	304.3	332.1	322	494	452.5	498.2	380.3		331.6	320.2	429.7	333.1	315.9	409.2	404.8	326.9
14.6167	386	311.8	336.3	319.4	479.3	458.1	495.4	377.4		338	318.3	455.9	327	323.8	421.1	397.2	332.2
14.6333	360.9	311.1	339.5	343.3	479.9	449.4	495.9	354.6		342.3	324.1	398.9	318.3	318.8	452.1	403.1	324.2
14.65	332.5	306.7	318.3	343	483.4	444.7	496	368.8		325.6	319.7	410.2	329.3	308.6	443.4	408.2	322.3
14.6667	320	298.3	312.9	325.7	483.1	446.7	495.1	378.5		351	322.6	444.6	319.5	311.5	431.8	402	325.5
14.6833	311.3	301.5	348.4	330.3	490.8	447	491.6	379.8		340.6	323.8	417.3	323.4	319.7	443.2	394.2	323.3
14.7	314.5	305.4	325.6	331.8	484.1	455.6	498	362.7		336.6	321.4	410.1	325.6	314.8	449.1	406.1	320.5
14.7167	309.7	306.8	313	338.9	489.2	445.6	497.1	377.7		338.7	328.8	418.7	317.3	318.4	454.2	398.2	314.9
14.7333	335.9	307	316.5	321.7	495.1	428.6	491.8	375.4		332.9	316.9	450.1	320.5	325.8	439.3	398	317.6
14.75	375.8	302.7	353.2	319.4	494.1	406.5	498	383.7		336.4	323	442.2	328.7	319.9	433	389.4	326.6
14.7667	394.1	300.4	397.1	342.4	488	403.5	513.6	363.2		334.3	330.8	406.6	328.1	316.5	428.7	401.2	319.2
14.7833	342.1	308.7	356.4	342.9	482.8	386.6	503.6	371.7		339.2	331.8	413	327.1	325.6	442.8	391.5	327.7
14.8	328.2	307.2	332.7	331.7	488.2	375.7	501.3	380.6		327.8	328.5	400.9	332.2	321.6	452.5	407.5	328.8
14.8167	317.6	308.8	340.7	332.8	494.9	372.5	500.2	355.9		342.7	317.7	388.9	327.7	312.4	440.8	404.5	331.6
14.8333	311	302.1	322.8	343.4	494.1	389.4	500.9	362.9		328.3	315.4	436.5	326.2	324.2	434.1	404.1	335.4
14.85	307.5	302	316.9	319.7	487.1	367.4	490.6	371.6		347.9	316.8	449.9	326	318.8	431.4	398.8	328.1
14.8667	315.7	302	331.7	326.9	483.6	366.2	493.5	382.3		330.7	314.4	403.3	326.9	310.3	437.1	406.8	329.7
14.8833	317.7	304.6	344.1	340.8	483.9	369.5	483.6	388.1		342.2	322.7	405.6	338.2	313.5	442.2	403.5	324.8
14.9	312.8	302.4	352.7	353.9	494.4	369.1	498.6	363.8		344.6	321.2	414.6	325.9	319.1	443.8	404.8	322.4
14.9167	320.8	305.5	338.3	331.5	472.4	359.5	491.2	369.2		324.2	321	443.5	324.3	316.4	431.9	411	322.1
14.9333	324.4	301.6	349.3	326.7	472.1	385.9	501.4	374.2		339.6	319.3	468.1	324	316.1	434.6	405.8	316.8
14.95	319.7	301.1	351.6	344.3	483.2	368.7	503.6	368.8		327.8	326.8	464.6	326.6	323.8	448.8	404.2	326.5
14.9667	327.7	301	311.3	337.1	482.2	376.7	517.8	393.2		343.5	330.4	424.3	327.8	318.8	442.9	393.7	322.6
14.9833	350.4	304.5	312.8	322.3	483.8	384.7	502.4	371.4		332.7	335.2	434.4	329.7	312.1	430.9	398.3	330.7
15	379.5	311.8	370	329	489.2	373.7	498.6	366.7		327.8	326.4	419.4	323.9	314.6	417.1	398	326.6
15.0167	345.3	307.7	409.8	323.8	482.1	379.2	503.3	378.2		333.2	326.9	458	324.9	309.8	423.9	392	331.3
15.0333	331.2	301.9	368.5	321.4	480.3	365.2	497.8	367.7		332.2	330.4	419.1	326.7	320.3	446.5	392.9	338
15.05	322.4	302	330.9	324.5	481.8	370.2	494.5	360.2		339.8	324	446.7	322.6	322.6	457.3	385.2	326.8
15.0667	317.7	308.1	324.9	345.7	471.6	386.5	494.9	371.3		341.7	325.7	395.9	329.9	316	453.6	397.1	328.7
15.0833	320.6	312.3	324.1	355.5	483.2	381.7	493.3	368.4		343.7	329.4	387.3	337.8	319.5	437.5	393.6	322.9
15.1	346	306.9	338.7	360.3	488.2	384.6	497.4	370.7		324.9	325.6	399.2	330.2	318.2	440.5	401.7	319.5
15.1167	377.1	311.3	322.5	344.5	490.6	412.6	504	373.5		342.3	314.7	443.1	322.2	318.9	440.9	390.7	319.1
15.1333	386.5	304.1	353.2	335.4	484.9	432	516.1	371.3		323.9	313.2	465.5	330.7	319	441.9	397.9	332
15.15	343.7	308.3	346.1	323	478.1	457.1	503	370.2		344.7	323.4	456.4	329.2	317.3	433.3	399.7	332.9
15.1667	331	309.8	337.4	318.7	493.6	471.7	495.2	358.8		344.1	330.8	416.3	330.8	315.3	443.4	407.7	334.7
15.1833	321.5	311.7	331	331.9	491.3	481.5	501.1	367.6		328.4	318.9	416.9	326.6	313.3	431.8	383.8	326.3
15.2	321.1	311.1	331.9	344.1	484.1	476.7	504.5	362.8		352.3	314.7	409.2	324.4	314.8	439.8	388.3	335.6
15.2167	318.4	311.9	366.6	344	483.2	466.6	499.7	365.6		332.1	318.4	409	331	322.8	453.8	387.2	326.4
15.2333	311.1	315.4	357.4	347.5	478.7	459.2	495.6	354.7		349.3	317.2	447.9	335.3	320.4	446.2	399.1	333
15.25	343.9	321.1	329.4	336.7	483.3	441.7	496	357.6		335.2	325.7	448.9	334.2	317.5	444.3	392.1	323.5
15.2667	387.2	315	322.1	322.3	485.6	407.4	498.6	370		333.3	327.7	400.6	334.9	320.5	444.9	394.6	325.7
15.2833	385.3	308.9	322	320.3	481.6	390.6	500.7	363.1		340.8	322.8	413.9	326.3	323.5	428.6	401	326.8
15.3	340.9	315	329.8	336.5	481.9	370.2	498.4	360.4		326.3	325.6	454.6	327.8	318.7	425.5	399.3	327
15.3167	334.1	309	339.5	359.4	482.9	357.1	496.3	369.6		350.2	328.5	474	337.5	318.1	445.8	409.4	333
15.3333	324.5	305.5	369.3	367.7	485.6	372.6	497.8	370.8		335.3	337.6	414.3	333.6	314.6	441.7	406.5	325.2
15.35	318	307.7	331.9	368.8	471.2	367.8	497.1	360.6		348.9	327.6	414	333.1	313.2	454.1	403.5	329.4
15.3667	331.8	310.5	319	343	479.7	369.7	495.3	381.7		349	324.5	416.6	339.9	315.6	443.6	397.9	319.5
15.3833	364.8	312.7	333.7	325.7	483.4	376.9	501.1	372.4		341.2	322.3	461.9	328.7	315.1	427.5	404.9	330.3
15.4	387.5	311.2	360.8	348.4	486.5	381.3	506.2	360.8		344.5	329.8	438.6	337.6	315	432.3	391.2	333.5
15.4167	369.8	311.9	327.2	327.3	484.3	379.3	499.1	352.3		339.7	330	411.3	331	315.9	426	387.6	333.1
15.4333	328.5	315.4	322.7	324.4	487.5	371.3	505.9	358.1		326.1	323.1	405.9	325	322.9	446.7	394	333
15.45	337.6	315.1	328.1	328.4	488.8	380.5	504.3	364.9		335.5	316.1	403.4	320.7	320.4	448.7	394	326.1
15.4667	326.7	303.8	328.9	339.3	480.3	376.6	499.7	359.8		334.2	324.7	403.1	328.7	312.3	449	395.7	327.7
15.4833	315.7	310	330.7	327.8	482.6	413.3	497.4	361.7		328.8	320.6	423.8	324.6	320.7	436	397.7	325.4
15.5	314.2	303.1	377.7	330.6	485.5	436.4	525.6	355		344.5	327	441.3	328.4	314	436	396.2	324.2
15.5167	315.8	306.5	397	330.1	491.1	447.3	514.7	361.9		330.2	320.1	394.3	331.5	307.1	436.9	380.5	322.3
15.5333	326.3	309.5	339.9	318.8	490.2	473	512.4	361.1		356	313.1	403.6	331.9	317.4	448.2	399.1	322.9
15.55	348.5	301.3	334.8	317.2	481.4	472.1	506	352.4		341.3	318.2	422.1	330.3	316.2	436.8	399	328.2
15.5667	384.4	308.8	332.4	336.9	481.1	489.3	498.2	356.4		343.6	325.8	473.9	330	313.4	420.5	397.3	320.2
15.5833	377.1	309.8	357.1	342.2	483.6	483.9	499.8	362.1		331	335.5	474.9	324	316.5	440.8	395.3	325.2
15.6	336.4	315.2	343.2	333.4	493.5	470.1	498.2	366.3		346.6	334.2	430.9	321.4	314.3	468.6	387.3	315.5
15.6167	323.1	308.1	314.5	352.9	490.5	464	494.6	369.5		327.9	325.4	410.2	318.5	314	448.2	393.1	320.3
15.6333	323.9	306.3	323.6	341.8	498.7	457.9	496.7	376.9		342.7	331.1	400.5	331	320.1	442.8	396.5	320.9
15.65	318.8	308.6	329.1	325.5	494.6	453.7	530.7	351		337.8	331.9	411.3	323.2	320.9	441.2	404.7	321.9
15.6667	314.6	300.3	323.8	328.5	495	448.8	523.2	372.6		338.8	328.5	433.5	325.6	311.5	492.9	394.6	332.4
15.6833	341.8	299.2	337.8	345.4	482.9	451.6	509.2	372.1		343.3	309.9	453.8	334.6	315.4	461.9	394.9	327.7
15.7	373.1	305.9	328.5	338.1	485.6	444.2	502.1	370.3		336.1	309.1	461.8	340.1	320.2	454.2	396.7	332.3
15.7167	395.5	312	322.9	325.9	492.9	444.9	501.1	371.8		354.2	319.4	403.2	327.9	315.7	444.5	396.1	329.4
15.7333	363.1	310.3	359.3	325.1	494.7	447.6	494.1	362.5		333.3	326.8	392.6	328.9	314.2	437.2	393.4	319.5
15.75	339.7	299.7	395.4	319	484.6	450.5	498.3	367.2		348.6	320.1	402.5	329.8	314.9	437.9	394.8	331.2
15.7667	330.4	305.1	345.8	341.5	487.5	447.5	492	365.3		341.2	315.7	419.4	329.1	319.3	443.2	397.6	325.8
15.7833	322.3	312.8	333	338.5	492.3	446.2	507.6	363.3		338.4	323.7	403.5	314.3	313.9	456	386.7	326
15.8	323.8	306.1	323.5	333.7	503.3	459.9	506.2	364.8		337.2	324.8	419.5	324.4	317.4	444.8	393.9	326.9
15.8167	326.6	306	319.6	350.4	492.7	453.9	502.6	381.4		326.7	328.4	438.1	331	315.3	429.4	390.5	325.3
15.8333	347.7	303.4	319.1	375.1	479.1	457.4	511.6	363.8		335.6	322.9	440.6	327.5	315.9	444.6	397	323.3
15.85	383.4	305.6	355.3	351.7	487.7	451.9	510.2	364.8		335.1	321.3	411.5	326.2	317.7	450.1	400.5	321.3
15.8667	404.7	308.5	346.4	335.5	492.3	455.4	510	359.8		339.3	327.1	418	336.4	315.4	448.3	413.9	327.1
15.8833	359.1	314.1	327	321.2	492.9	452.5	501.4	365.2		329.5	335.7	455.2	335.2	323.7	442	401.9	324.4
15.9	331.3	310.6	356.4	319.3	481.7	453.8	496.7	367.6		349	331.6	401.4	335	316.2	445.5	402	327.5
15.9167	325.9	307.5	333.6	329.4	487.2	459.2	497.8	376.6		332.6	325.9	426.1	335	317.8	453.7	408.9	321
15.9333	326	302.7	309.7	342	489.6	497.1	499.7	364.8		342.5	330.3	454.6	329.8	323.2	442.7	406.4	323.6
15.95	326.9	298.6	310.8	347.2	487.4	446	501.7	359.8		339.5	330.9	427.3	324.8	319.6	434.3	387	326.5
15.9667	358.1	305.9	314.4	337.5	477.5	458.1	500.2	366		334.7	323.2	390.7	325	315.6	441	397.4	319.2
15.9833	390.9	312	349.5	333.6	493.5	411.3	502.6	372.1		337.6	330.8	421.2	323.3	312.5	449.6	397.1	328.5
16	395.3	309.4	387.1	327	500	398.9	507.3	368.5		334.5	330.1	411.5	322.2	310.3	446.5	395.3	323.7
16.0167	343.2	303.9	355.9	333.9	483.6	390.3	503.6	364.6		347.9	327.4	441.3	334.1	316.1	448.7	399.4	330.9
16.0333	321.4	302.3	314.5	336.6	492.6	387.5	504.8	364.9		327.2	323.6	454.9	323.6	316.9	424.7	387.8	328.4
16.05	321.9	314.1	330.5	342.1	497.3	381.9	499.8	369.3		348.6	322.2	429	322.2	316.1	448.3	381.9	329.8
16.0667	322.9	309.7	338.7	325.6	492.7	375.9	506.9	365.6		334.3	325.5	412.6	326.4	321.2	451.5	384.6	335.2
16.0833	320.4	299.6	335.5	337.2	494.7	371.7	494.9	359		346.1	335.4	415.5	322.6	324.5	445.9	392.7	333.3
16.1	319.2	308.6	343.7	335.3	501	384.1	496.7	381.5		341.7	326.4	420.3	329	320.6	438.2	386.9	333
16.1167	323.3	305.5	322.3	325.5	488	383.1	503.9	367.2		337.6	326.9	445.1	328.1	312.3	425.9	402.6	325.2
16.1333	322.2	309.4	318.6	332.9	493.2	400.3	494.5	361		357	330.4	459.7	322	314.6	419.1	390.8	321.6
16.15	338.5	305.6	323.3	336.4	499.1	426	495.8	383.5		332.8	345.6	461.7	318.5	321.9	437.2	391.8	321.1
16.1667	369.2	302.5	332.5	331.7	495.6	452.8	500.3	369.2		351.1	341.6	406.6	323.3	318.5	439.6	405.8	327.1
16.1833	392.4	309.8	390	331.1	489	465.9	508.7	378.5		342.4	329.8	415.6	327.4	322.4	450.3	404.2	327
16.2	349.7	312.6	342.4	331.9	499.4	472	504.6	369.4		335.1	327.4	421.1	325.3	319.5	440.5	397.1	317.5
16.2167	330.9	306	334.3	342.4	488.7	474.6	505.8	349.2		337.6	321	446.1	329.4	317.3	436.6	403.1	334.4
16.2333	326.7	308.6	312.4	364.5	493.3	462.8	506.8	362.9		326.7	317.5	406.2	332.5	317.9	443	403.9	321.9
16.25	326.1	303.8	312.1	333.8	487.8	467.3	513.9	374.2		345.1	316.2	416.4	335.5	318.9	435.2	400.5	328.9
16.2667	319.1	314.3	333.6	327.9	495.8	452.3	512.3	368		322.5	316	437.7	336.8	315.5	434.2	395.7	332.4
16.2833	324.2	303.7	342.6	323.7	492.5	439.1	510.3	371.5		346.3	329.8	386.9	327.5	317.7	455.6	387.3	320.8
16.3	355.2	305.7	368	337.8	500.7	410.5	507.4	357.2		348.6	324.8	402.6	327.1	318	457.7	394	326.2
16.3167	389.6	312.9	393.9	343.2	499.2	396.2	496.7	366.5		347.2	327.6	447.9	327	312.8	455.4	393.1	324.3
16.3333	405.5	309.5	329.1	326.6	491.2	375.3	488.3	366.9		341.8	318.4	456.6	328.7	319	439.5	400.8	327.5
16.35	347.1	303.9	317.8	334.7	482.4	374.2	495	364.4		334.2	324.1	424.1	329	319	450.3	401	323.6
16.3667	334.9	309.2	329.2	330.6	494.2	381.8	489.8	374.4		348.7	329.2	392	329	319.9	453.5	410.5	328.3
16.3833	328.1	306.4	335.9	324.9	492.3	374.2	502.1	363.7		344.6	319.5	445.6	331.6	322.6	447	408.3	331.5
16.4	333.2	315.6	348.1	362.2	493.8	387	496	359.6		343.2	327.7	453.7	333.7	315.2	435.8	407.2	320.7
16.4167	324.4	309.9	340.2	346.5	487.1	397.4	510.7	360		337	331.4	439.3	339.1	310.7	441.2	403.6	330.5
16.4333	320.6	305.7	321.9	331.4	486.1	425.6	495.4	375.6		343.9	338	400.1	338.2	311	447.9	402.2	322.3
16.45	320.1	302.5	320.3	338.8	487.7	461.4	497.6	373.3		342.3	331.9	401.7	325.9	316.2	454.9	402	322
16.4667	326.1	302.1	328.7	341.6	499.2	454.1	498.8	365.3		336.8	318.2	401.1	331.2	318.6	457.6	397.7	319.4
16.4833	324.3	306.3	366.1	320.3	486.1	467	505	358.1		349.1	326.7	446	319.8	320.7	445	403.1	327.7
16.5	324.9	304.3	394.6	329.6	488.6	468.7	505.9	353.7		329.1	329.5	467.6	326	321.8	435.5	400.4	322.8
16.5167	325.9	294.5	395.8	336	486.4	474.2	493.9	373.8		354.1	325.6	466.2	332.1	315.9	442.8	396.6	325.6
16.5333	324.3	299.3	328.5	342.9	492.1	469.7	499.2	367.9		330.7	321.6	398.6	334.6	323.8	442.1	392.6	327.7
16.55	315.4	311.1	322	340.4	492.9	457	500.8	359.3		347.4	321.1	420.6	325.4	320.5	449.8	396.4	329.7
16.5667	314.2	301.5	323.7	326.2	484.3	450.9	501	351.3		340.1	329.7	403.6	331.1	316.6	448.2	394.3	330.8
16.5833	314	301.1	343.9	327.8	489.2	445.8	494.1	366.6		339.2	326.5	399.6	339.7	312.6	446.3	387.1	322.3
16.6	345.1	295.8	378.6	333.2	485.6	453.8	496.6	366.9		345.9	320.9	435.4	340	317.3	454.7	400	329
16.6167	371.8	306.4	381.5	339.9	496.3	444.5	498.7	359.2		333.9	307.1	429.9	334.8	317	449.8	398.3	330.7
16.6333	382.4	306.9	331.8	333.9	500.4	458.8	500.7	368.5		349.5	316.5	436	323.7	313.5	452.6	398	326.6
16.65	347.5	300.9	329.4	327.1	486.2	452.9	506.1	364.6		335.2	330.8	404.9	330	321.7	443.4	404.9	323.5
16.6667	332.4	300.1	361.9	325.3	482.6	459	504.3	357.2		337.6	339.6	408.4	332.6	320.2	427.5	397.2	327.4
16.6833	331.2	299.2	356.8	314.7	480.3	449.5	498.9	350.1		335.4	334.8	450.4	328.6	319.2	440.9	398.8	326.2
16.7	325.8	305.9	320.7	334.8	486.1	435.2	512.8	358.7		344.6	319.4	415.5	328.9	313	448.8	399.8	318.2
16.7167	326	302.5	337.4	347.1	483.4	418.6	514.7	365		338	326.8	403.8	329	310.4	451.6	406	322.4
16.7333	355.4	309.9	352.6	328.9	490.8	405.1	500.3	365		339.7	335.6	414.4	328.1	313.5	451.1	393	322.9
16.75	387.9	303.9	334.8	329.8	495.3	388.6	503.5	370.2		337.4	330.8	455.6	328.9	312.2	443.2	403.4	329
16.7667	389.7	304.9	322.9	329.1	489.9	386.4	498.7	357.9		347.4	327.5	408.4	331.6	315.5	437	396.1	316
16.7833	335.5	306.7	315.2	327.3	492.6	381.7	495.5	355.4		341.9	314.1	402.9	339.7	317.7	450.8	393.4	329.8
16.8	341.1	310.4	324.5	321	494.7	401	489	358.5		339.4	307.1	407.3	330.5	317.1	443.2	397.4	325.7
16.8167	328	306.6	318	327.9	488.9	401	502	357.2		352.9	319.1	425.2	334.4	319.6	447.3	420.4	326
16.8333	324.5	309.5	338.8	348.7	496.8	388	498.5	371.7		335.7	326.8	443.2	332.3	318.2	444.5	425.2	322.5
16.85	333.6	303.9	334.6	351.6	497.8	401.8	508.4	367.6		336.8	333	443	339	324.9	450.1	405.1	324.7
16.8667	340	293.6	315.9	339.8	491.1	415.8	502.9	364.5		332.7	334.7	417.9	332.9	324.1	456.9	403.3	327.5
16.8833	377.2	304.3	348.8	323.5	487.5	446.2	515.1	361.5		330.4	325.5	409.3	326.1	311.9	429.3	391.8	323.6
16.9	405.6	304.9	395.7	316.2	486.2	451.2	499.4	362.8		341.3	318.1	466.1	327.7	314.6	441.1	395.4	324.8
16.9167	362.7	305.9	347.5	341.1	478.2	465.7	499.1	363		339.3	331.9	417.6	331.4	322.7	429.8	399.4	319.8
16.9333	338.7	298.2	335.8	348.8	490.1	480.7	505.1	360.4		355.5	337.2	382.5	338.8	313.5	447.3	398.2	324.3
16.95	331.2	294.6	333.4	329.9	493.5	477.5	497.2	373.9		331.7	324.9	397.6	333.8	313.1	449.6	402.3	318
16.9667	325	305.3	313.2	336.9	489.6	475.3	494.4	362.7		342.3	333.6	403.1	332.2	316.5	425.7	397.7	324.9
16.9833	325.9	312.8	354.5	342.2	488.2	460.3	502.7	361.2		342.9	327	409.9	334.6	321.3	434.6	401.4	322.4
17	326.8	308.7	389.5	316.9	492.4	431.5	499.5	366.2		348.2	333.1	415.2	329.8	311.5	428	398.5	322.9
17.0167	327	307.2	376.1	313.5	498.1	412	499.9	359.1		337.6	339.1	400.3	323.9	313.7	436.7	399.8	323.9
17.0333	360.7	304.4	336.2	327.8	499.7	396.4	496.5	346		345.7	324.3	429.4	328.3	319.1	456	400	325.7
17.05	393	308.4	326.5	349.6	490.5	392.6	503	367.6		332.1	308.5	455	331.5	312.1	455.1	400.9	325.1
17.0667	361.9	312.4	323.5	370.7	497	381.7	495.2	373.1		345	311.5	468	327.6	315.5	445.5	407	318.1
17.0833	339.5	304.3	325.7	364	499.6	393.2	503.7	362.6		331.2	315.4	431.7	327.1	324.6	432.1	409.6	320.6
17.1	334.7	298.8	342.4	339.8	489.6	392.2	504.8	376.8		341.4	330.6	421.6	321.8	320.6	436.3	399.6	324.4
17.1167	326.3	305.9	374	328.7	497.7	395.5	505.8	379.6		344.5	321.4	422.8	320.2	319.2	452.5	401.7	329.2
17.1333	319.1	305.1	332.5	324.6	496.2	402.8	509.4	372.2		346.7	318.5	405.7	327	322.5	469.4	399.4	325.6
17.15	319.9	298.1	330.3	347.4	491.7	415.9	506.5	360.8		352.1	330.2	406	330.5	322.9	445.7	408.6	326.8
17.1667	318.3	296.3	357.7	331.5	498.9	431.6	494	368.8		341.6	329.2	454.4	337	313.5	444.2	396	318.3
17.1833	328.4	303.8	369.2	332.8	496.4	443.2	495.7	360.3		346.3	328.2	433.3	337	313.9	448.4	393.4	324.1
17.2	329.8	301.4	321.5	347.7	507.3	475.9	493.4	356.6		350.4	326.3	450.3	330.1	316.6	452.4	387.9	324.9
17.2167	323.1	301.1	313.3	354	489.7	476	497.4	355.2		338.8	326	398.2	331.7	316.1	441.7	392.3	329.3
17.2333	334.2	303.6	321.7	321.1	497.7	468.2	494.5	360.2		345.9	329.5	392.8	332	317.7	432.4	399	325.6
17.25	330.6	308.3	332.3	321.9	498	464.6	496.7	365.2		336.5	337.7	403.4	333.7	326.6	449.4	399.9	322.5
17.2667	372.4	302	324.3	326.3	493.7	452.8	493.5	361.6		340.4	331	421.2	325.3	325.2	453.4	422.5	331.6
17.2833	353.9	295.9	332.7	337.3	497.4	468.5	496.5	354.2		340.9	326.7	457.3	325.9	318.1	449.6	425.5	325.9
17.3	335	301.2	329.5	354.3	500.5	456.8	500.4	367		339.3	327.8	409.5	333.8	318	456.9	420.7	322.5
17.3167	320.3	303.6	328.2	347.1	504.4	460.4	491.4	360.1		365	328.8	399.6	333.1	318	448.3	396.8	323.8
17.3333	320	308.3	372.1	342.7	496.3	467	501.4	370.4		333	332.4	411.2	339.9	314.5	445.5	393.5	324
17.35	320.9	304.6	405.7	332.6	491.7	459.2	505.4	364		353.8	339	407.6	336.5	310.6	458	419.9	321.4
17.3667	325.3	298.9	388.7	331.2	489.4	461.6	490.4	368.3		331.5	335.5	422.6	335.2	315.3	460.6	392.3	322.8
17.3833	321.6	298.1	332.8	337.9	504.6	461.1	497.8	362		343.2	327.3	465.3	333.3	326.3	455.8	403.3	317.8
17.4	329.7	303.2	329.5	344	494.6	463.6	505.8	355.9		336.1	315.8	469.4	331.3	320.8	441.3	396.1	326.6
17.4167	335.2	310.8	336	332.8	499.3	452.7	502.5	369		336.9	306.5	456.1	374.3	321.8	442.8	402.9	320.9
17.4333	355.8	308.4	370.6	331.2	515.5	456.4	496	368.1		348.2	310.4	411.9	418.1	318.5	452.5	396.1	321.9
17.45	385.4	304.6	369.2	342.3	518.5	451.7	493.4	375.8		337.7	323.9	431.9	354.9	315.5	453.8	402.1	323.7
17.4667	387.6	301.5	374.2	342.9	512.9	451.1	495.6	363		356.1	323.1	397.4	346.3	317.7	449.6	405.5	319.6
17.4833	337.8	308	351.5	346.4	500.9	448.4	499.4	363		337	321.3	419.5	329.6	313.6	433.5	409.4	321.7
17.5	328.5	309.7	314.8	329.6	514	469.7	501.6	362.1		350	321	441.6	339.5	312.2	440.9	406.5	319.4
17.5167	328.9	298.7	312.4	330	495.8	453.5	497.6	365.5		341.3	327.9	448	336.5	316.4	452.2	394.8	319.9
17.5333	324.7	300.7	320.7	334.3	498.6	450.5	496.2	366.8		356.6	336.6	433.3	338.7	317.8	463.3	404.5	325.2
17.55	329.3	296.6	341.7	343.6	510.2	452.7	498.6	370.4		335.3	324	399.3	335.5	319.7	456.1	398.9	322.4
17.5667	326.4	301.3	367.9	328.4	498.8	445.2	500.7	371.8		342	319.7	419.8	334.2	327.7	443.9	397.3	316
17.5833	333.8	300.2	328.2	326.3	497.2	439	500.1	373.7		334.2	318.2	416.5	334	320.2	452.6	399.6	327.2
17.6	334	301.8	322	347.7	496.2	449.4	500.9	368.8		332.3	326.7	442	338.3	314.8	465.9	396.5	320.1
17.6167	328.8	307.2	312.5	332.4	495.2	456.8	505.3	363.8		339	337.3	418.7	332.9	318.4	471.2	407.3	323.5
17.6333	329	299.2	308.6	319.9	514.9	445.7	504.2	370.9		329.5	338.8	417.2	328.7	321.5	445.9	407.9	313.6
17.65	324.7	304.2	317.6	337.3	498.6	439	505.8	381.4		363.7	339	445.6	331.5	311.6	433	397.6	320
17.6667	317.2	310.1	337	348.3	500.7	444.2	498.2	374.1		341.5	328.6	458.9	331.9	310.2	453.8	399.7	317.4
17.6833	332.6	307.4	375.9	343.7	507	444.9	509.3	373.2		359.2	365.3	421.8	337.2	313.5	465.2	396.5	327.4
17.7	358.9	307.1	333.6	331	500.1	449.3	501.3	370.4		346.1	345.1	429.8	329.2	322.6	461.6	407.3	320.1
17.7167	368.5	305.3	333.9	326.7	494.8	443	505.4	378.7		340.8	320.8	436.9	330.8	321.2	455	401	327.8
17.7333	344.7	304.2	319.3	329.6	497.6	447.3	501.6	362.5		340.1	316.7	419.7	333.6	319.3	430.8	395.8	315
17.75	330.3	302.3	309.5	346.4	501.4	419.4	507.1	382		339.2	315.2	438.1	337.4	319	435.3	401.2	322.8
17.7667	323.1	303.8	317.7	345.2	503.6	404.4	502.7	364.7		353.7	323.7	459.6	336.2	324.2	451.5	390.6	315.2
17.7833	335.1	305.7	353.4	335.5	515.2	389.3	512.5	363.2		327.2	328.3	417.6	333.4	315.4	450.2	392.7	327.1
17.8	335.9	302.5	390.2	329.9	500.3	383.9	508.6	383.8		359.9	322	408.4	327.9	310.7	444.8	395.6	312.3
17.8167	330.8	309.8	347.7	336.9	500	382.3	500.3	387.4		344.4	327.2	431.4	328.8	313.6	440.7	403.7	320.7
17.8333	331	315.2	341	361.2	507.8	382	511.3	373.2		357	322.7	449.2	329	320.9	452.2	408.3	318.4
17.85	337	307.2	354	331.6	502.8	377.7	509.3	377.4		351.8	327.3	389.4	325.5	321.8	462.4	402.9	322.4
17.8667	326.6	304.4	317.7	331.1	501.2	392.7	506.4	369.3		344.2	338.3	420.2	325.9	324.6	458.6	413.4	317.7
17.8833	327.8	308.4	330.9	344.8	499.3	394.7	507.8	367.3		349.2	335.4	446	332.9	318.9	449.4	392.3	327.5
17.9	354.8	302	343.1	352.8	486.9	390.6	497.6	370.5		340.4	333.3	463.3	343.4	324.2	452.5	408.5	329.7
17.9167	387	308.1	369.8	359.9	494.8	393.5	496.2	356.2		350.4	332.2	423.3	334.4	319.7	449.5	453	331.7
17.9333	360.2	305.4	395.9	350.5	487.2	411.2	496.9	363.8		340.5	333.8	430	343.6	319.1	448.2	444.4	315.5
17.95	343.6	299.9	357.9	334.5	506	425.7	499.6	367.4		344.4	333.1	417.9	335.3	315.6	445.4	423.3	322.9
17.9667	336.2	297.4	339.8	331.5	504.3	444.1	493.9	364.5		345.8	333	421.4	327.3	315.9	446.8	410.1	312.6
17.9833	333.4	306.6	348.6	334.5	502.3	460.4	498.3	372.7		346.8	326.9	456.5	340.9	308.2	443.5	402.2	325.9
18	338.2	313	367.1	331.5	499.4	475.6	505.8	367.8		353.9	328.7	460.4	328	315.8	455.2	428	322.5
18.0167	336.3	306.9	358.4	327.6	506.8	477.7	505.1	359.3		352.3	328.1	422.9	330.6	320.3	445.5	430.6	328.1
18.0333	339.5	304.4	333.8	334	502.7	461.5	499.8	368.6		357.2	320.2	398.8	333.5	318.3	440.7	404.1	315.9
18.05	335.6	309.2	333.1	338.3	495.2	459.3	495.7	369.8		362.2	326.1	447.4	330.5	312	457.4	420.4	329.8
18.0667	342	313.4	345.1	326.8	486.4	439.2	502	379.5		344.7	315.6	462.6	328.3	313.7	456.2	446	320.5
18.0833	373.1	306.1	345.9	342.5	494.7	427.8	503.7	373.9		351	328.1	409.3	335	322.6	444.8	413.1	329.6
18.1	367	311.2	323.5	356.8	494.1	405.5	510.9	355		345.8	330.6	410.8	336.7	315.2	444.1	395.7	318.7
18.1167	338.5	314.5	326.5	336.2	506.1	389.5	513.6	374.9		343.4	327.5	404.1	344.7	312.4	450.1	402	323.3
18.1333	325.1	312.3	313.1	328.2	503.4	389.1	510.5	381.9		343.1	327.1	403.1	332	315.5	461.2	421.9	320.4
18.15	328.5	308.6	314.7	334.1	500.5	374.3	493.6	373.3		332.6	326.1	421.2	326.8	322	454.1	402.1	328.7
18.1667	320.3	308.1	322.7	327.1	500.9	387.9	497.4	362.7		348.5	328.6	453.9	330.4	320.3	456.6	396	313.4
18.1833	327.8	313.2	325.6	321.8	499.3	405.3	496.2	367.3		339.4	339.3	457.4	328.3	320	456.1	393.4	325.2
18.2	329.7	308.7	370	334.1	502.5	389.5	488.2	369.6		354.6	341.6	449.3	335	322.6	437	399.1	314.6
18.2167	332.6	305.5	394.2	349.6	493.4	393.4	498.9	367.4		347.2	329.8	415.3	328.9	323.8	437	412	327.9
18.2333	333.8	300.7	369	328.3	500	425	498.1	362.7		350.5	327.4	435.8	322.9	320.5	456	398.2	334
18.25	329.7	307	337	340.1	492.2	428.5	480.7	376.8		356.1	335.7	420.4	329	315.7	450.8	408.4	324.5
18.2667	327.4	311.3	330.9	329.6	497.2	445.4	490.5	359.7		345.6	334.2	453.8	335.1	313.4	451.8	404.6	324.1
18.2833	323.6	308.5	354.3	330	503.9	448.5	492.7	365.1		350.3	320.2	471.3	330.7	318.2	464.9	404.9	317.1
18.3	323.9	304.6	336.8	330	503.1	454.1	498.1	357.2		336.2	310.5	431.3	335.3	329.3	465.9	421.4	324.8
18.3167	324	306.7	333.5	318.8	494.4	461.8	492	373.5		370.6	317.9	397.3	335	323	453	411.5	324.1
18.3333	321.4	314.7	345.2	322.4	501.8	460.2	488.5	365.3		340.7	331.8	462.8	334.1	325.6	448.7	427.5	332.7
18.35	315.9	317.6	342.4	338.5	504.6	452.3	488.9	367.6		356.5	333.7	477.7	324.5	320.8	444.6	397.7	322.6
18.3667	316.8	306.7	320.4	330.3	507.5	450.3	488.1	368.8		352.6	327	416.6	323.2	321	447.5	396.2	323.8
18.3833	327.4	304.4	321.8	362.9	500.2	441.4	497.5	372.4		359.9	325.3	409.2	325.6	327	447.9	392.6	322.2
18.4	326.2	306.6	356.6	356.1	501.8	446.2	503.1	364.3		362.6	329.4	401.2	324.2	326.1	455.8	393.8	325.5
18.4167	331.2	312.1	340.5	337.9	504.6	440	496.1	364		347.4	335.1	451.2	332.7	322.6	468.1	410.4	324.2
18.4333	333.6	312	325.4	342.3	503.2	428.8	491.7	370.1		347.9	336.7	456.2	333	318.6	467.1	404	326.6
18.45	325.3	307.7	336.3	357.6	488.3	435	491.1	369.1		348.9	340.4	420.6	331.3	315.5	458.4	405.7	316.6
18.4667	327.6	308.8	378.4	339.8	490.6	436.7	491.9	372.5		351.6	331.4	399.3	335.4	317.7	445.9	412	324.7
18.4833	325.4	306.4	372.9	343.4	493.5	433.5	485.9	362.6		351.9	331.9	423.3	332.5	323.1	442.5	405.9	317.2
18.5	327.6	314.7	332.3	330.1	486.2	405.4	497.2	361.2		345.1	333.7	417	338.1	331.7	430	403.4	326.5
18.5167	328.8	307.2	331.2	332.6	499.9	394.7	494.4	376.6		359.7	335.7	431.7	333.7	325.9	441.2	403.9	318.3
18.5333	328.1	307.9	327.6	337.3	494.8	381.1	494.9	370		342.7	336	473.5	340.9	317.3	449.7	392.7	327.6
18.55	328	307.1	343.5	347.4	502.8	372.4	490.7	380.4		364.6	335.1	414.3	328.9	317.9	454.3	403.3	323.6
18.5667	328.9	312.2	394.1	347.9	492.6	377.2	495.3	366.2		347.6	323.8	398.5	333.3	320.6	461	397	330.9
18.5833	329	310.3	409.6	340.2	508.5	391.7	488.1	365.2		339.3	321.4	424.9	330.4	320.1	450.6	407.4	318
18.6	321.2	306.6	375.4	335.7	499.4	383.3	496.7	372.8		346.8	328.8	469.9	328.3	317.4	443.2	397.5	327.5
18.6167	332.3	311.3	338.7	343.7	510.3	383.9	502.1	370.4		340.9	330.7	478.6	333.2	317.9	448.2	401.4	321.9
18.6333	332.9	304.1	338.1	324.9	495.3	381.4	493.4	363.1		361.7	330.1	418.4	327.8	319.7	442.8	416.6	328
18.65	332.1	304.9	325.9	319.8	508	387.1	495.6	361.3		343.8	325.7	403.4	330.6	325.1	449.9	412.6	318.5
18.6667	326.8	299.8	319.9	329.5	496.8	387.9	502.9	384.4		369.9	326	404.8	334.4	325.9	440.5	417.3	319.8
18.6833	327	300.8	326	355.9	501.3	385.4	501.3	373.7		344.9	323.4	402.4	347.9	323.4	450.4	413.6	319.1
18.7	327.9	307	338.1	350.8	491.5	389.4	501.9	366.2		372.7	339.5	397.7	339.3	326.5	463.9	393.2	321.6
18.7167	329.7	315.7	364.8	349.2	505.8	394.2	497.7	362.6		343.6	333.9	425.6	339.9	321.7	457.9	403.4	320.2
18.7333	325.6	308.2	334.7	341.3	499.1	388	499.7	369		360.4	318.4	455.3	345.2	315	439.8	393.5	329.5
18.75	323.4	306.3	333.2	349.7	497.3	391.5	504.3	371.6		344.5	324.1	458.5	332.1	313.3	452.1	388.8	323.9
18.7667	324.8	307.8	345.1	355.1	515.2	412.7	498	371.1		355.3	335.3	413.1	330.3	320	457.2	395	333.5
18.7833	325.8	309.7	329.5	336.9	494.3	441.5	491.9	378.8		352.4	342	407	329.2	326.9	452.7	393.3	322.7
18.8	326	301.3	313.5	340.4	494	465.3	497.2	365.1		346.9	336.8	420.8	335.1	324.4	459.9	398.2	328.1
18.8167	345	301	322.6	335.7	497.5	475.4	500.5	371.1		354.8	335.2	462.5	341.1	319.7	453.9	397.2	322
18.8333	374.4	301	329	338.6	506.6	469	493.1	359.8		361.9	325.5	447.4	338.4	320	463.5	403.1	328.9
18.85	361.9	296.7	348.9	356.2	510.4	481.1	494.7	372.9		361.1	323.3	404.7	338.1	319.1	448.4	407.3	316
18.8667	338.6	309.9	388.8	352.6	505.7	463.7	501	368.7		362.7	320.5	440.4	342.3	320.7	456.7	408.8	325.5
18.8833	321.7	316.9	403.7	347.8	502.5	453.6	488.9	375.9		352.6	321.8	418.4	336	316.6	447.4	401.2	321.6
18.9	331.5	308.3	360.7	342.8	502.1	447.9	501.1	382.9		352.9	325.4	409.4	340.3	314.4	443.6	408.8	324.5
18.9167	334.5	303.7	328.1	348.2	499.4	441.9	496.7	373.5		342.6	325.1	418.6	340	315.8	445.7	390.8	356.1
18.9333	339.3	304.8	322	338.5	500.8	432.5	484.9	374.8		360.2	328.5	440.6	334.8	320.3	467.6	384.9	393.2
18.95	328.7	303.2	340.2	334.6	506.2	412.2	481.5	375		334.1	332.4	456.5	329.8	327	493	397.1	355
18.9667	331.5	303.9	342.6	354	506	387.8	498.4	381		361.7	333.8	387.8	330	320.1	461	404.8	338.6
18.9833	331.9	297.9	359.4	374.7	495.6	381.9	496.3	363.7		345.5	336.6	416.5	330.9	323.5	456.7	400.6	320.8
19	331.1	297.1	323.6	395.7	503.7	377.7	498.6	382.1		365.8	339.5	446.3	328.4	325.7	452.6	383.7	318.4
19.0167	338.8	305.7	330	351.9	497.9	371	501.5	373.4		354.7	333.9	423.6	332.4	323.4	465.1	403	335.3
19.0333	329.5	303.4	328.3	333.8	495.4	378.8	503.7	374.8		367.1	325.3	398.9	332.1	318.7	468.5	396.1	322.1
19.05	336	309.1	317.7	340.9	507.2	379	498.8	359.4		351.4	342.3	415.4	335.5	319	464.6	402.9	338.4
19.0667	371.4	309.9	350.8	334.9	510.5	386.8	497.2	359.9		347.6	342.9	448.8	339.4	325.9	452	395.2	327.7
19.0833	388.4	303.9	376.9	337.6	510.1	404.3	496.2	352.2		349.7	340.4	447.2	338.2	318.2	458	401.9	334.9
19.1	348.3	308.3	346.7	339.7	504	433.4	484.8	378		348.2	321.9	414.2	330.2	317.2	473.6	398.5	335
19.1167	334.2	308	334	354.7	510	458.1	496.2	374.5		356.7	314.2	438.2	330.9	319.6	459.2	406.7	332.4
19.1333	335.8	306.3	338.3	348	513.5	468.4	508.1	374.1		353.5	324.4	476.9	330.1	326.9	446.1	394	331.2
19.15	337.7	302.6	345	341.1	505.3	467.2	494.2	369.7		353.1	332.7	425.1	343	319.2	447.7	393.1	330.2
19.1667	338	295.2	369.2	328.9	514.5	466.2	489.7	370.8		352.1	325.2	419	341.3	316.4	466.1	390.4	325.7
19.1833	333.7	300.2	339.6	352.3	511.5	456.5	500.3	358.9		346	326.8	419	340.2	317.8	466.9	396.1	326.8
19.2	330.5	298.3	334.8	348.6	507.6	457.8	506.1	378		366.7	328.7	441.5	333.1	320.6	455.7	396	323.5
19.2167	331.8	299.8	321.1	342	515.7	462.3	507.7	368.5		341	328.1	469.6	343.4	320.1	452.5	392.5	336
19.2333	337.2	298.2	359.1	339.4	506.5	455.1	496.7	387.1		363.5	332.3	454.4	337.9	320	454.7	397.3	329.1
19.25	335.3	303.2	378.9	334.7	506.1	449.8	499.6	381.8		348.4	332	398.7	332.8	316.5	472.2	403.1	329.9
19.2667	329	300.4	382.4	342.7	505.1	454.3	499.9	367.3		352.4	334.6	402.4	333.8	318.7	466	386.6	333.4
19.2833	329.9	297.5	382.1	362	513.7	452.3	489.6	370.5		340.8	334.1	416.8	327.9	319	469.5	388.7	340.8
19.3	328.3	302.3	380.3	355.1	498.4	449.4	500.3	372.7		347	329.7	447.2	331.4	312.9	465.6	395	332.3
19.3167	326.3	303.8	345.5	346.4	487.7	442.1	507.8	360		350.5	325.6	419.4	331.9	320.8	502.3	399.3	343.3
19.3333	322.6	305.7	332.1	338.3	498.3	448.1	495.9	355.7		344	327.7	429.4	337.2	325.3	457.9	392.1	344.8
19.35	329	300.8	346.7	339.8	510.2	446.3	497.7	353.4		359.6	343.5	420.4	332.7	319	445.9	402.4	337.2
19.3667	335.9	300.1	331.4	365.9	503.1	436.5	502.3	372.9		340.1	354.3	403.6	335.6	319	457.2	396.9	339.6
19.3833	337.7	305.2	326.7	347.8	494.4	433.5	494.3	375.6		355.6	341.1	429.9	339.4	322.5	458.8	390.9	333.9
19.4	332.8	317.1	323.5	336.7	493.2	421	501	372.5		353.3	332.4	473.2	335.6	325.5	471.9	393.6	334
19.4167	333.8	319.6	323.9	340.4	499.1	425.3	509.6	364.3		336.6	326	451.4	342.9	319	459.9	398.3	325.4
19.4333	334	308.7	336.1	337.5	494.7	434.6	507.4	363.2		360.3	331.2	410.4	342.1	318.1	472.1	394.6	326.8
19.45	332.3	303.8	376.7	349.2	500.1	438.4	498.4	366.5		339.3	323.2	418.7	336.8	319.7	450.4	378.5	327
19.4667	333.8	291.9	400.3	341.2	510.4	430.3	497.2	357.4		358.9	315.3	420.7	339.6	328.6	456.1	394.5	331.3
19.4833	328.8	304.1	343	335.8	501.4	408.4	497.9	376.1		341.7	322	461.6	329.6	317.7	453.4	401.8	323.3
19.5	334.2	303.1	341.3	349.8	507.1	382.1	493.7	365.6		361.8	332.4	479.2	332.5	313.6	464.3	408.9	326.5
19.5167	330.6	297	338.4	350	513.1	367.3	500	371.1		360.2	339	446.2	329.5	320	456.3	406.4	318.3
19.5333	329.2	301.3	340.7	345.7	501.8	371.4	500	375.3		354.8	332.1	391.5	334.3	321.7	451.7	404.3	330.1
19.55	326.4	303.6	339.2	355.5	512.3	365.9	509.5	360.3		355.8	322.5	431.7	333.2	328.9	455.4	398.9	324
19.5667	333.8	304	362.4	354.2	511.2	372.9	496.1	367.8		353.4	327.3	451	344.3	322.9	457.7	398.1	330
19.5833	336.6	297.9	383.7	345.4	503.2	386.8	499.5	361.9		357.4	328.8	405.2	337.1	321.3	467.5	395.4	324.8
19.6	334.3	301.5	361.5	334.7	503	388.7	489.6	365.4		340.6	329.8	401.6	331	329.7	463.6	389	329.3
19.6167	334.9	300.2	337.7	336.7	509.1	388.1	498.6	372.8		352.2	333.4	433.1	337.9	324.8	451	391.6	323
19.6333	338.4	302.6	335.4	334.4	494.3	388	500.7	366.1		345.1	333.9	471.1	336.3	318.9	448.4	385	327.3
19.65	332	305.5	349.7	343.6	505.3	405.3	495.8	369.5		346.7	334	469.3	331.7	319.9	458.4	402.3	326.2
19.6667	332.9	307.7	388.9	342.2	504.2	393.8	507.2	371.7		359.1	338.3	415.4	335.4	326	471	399.4	329.5
19.6833	332.1	302.8	352.7	344.6	510.1	390.5	490.6	368.5		336.5	332.9	423.7	331.6	325.1	461.5	406	325.6
19.7	335.5	304.7	332.2	357.1	511.7	414.3	492.7	353.4		362.9	331.3	433.5	329.4	316.4	464.5	398.2	324.2
19.7167	333.3	298.9	332	351	510.2	424.4	498.1	369.5		341.4	334.5	465.1	336	320.4	462.3	406.7	332.7
19.7333	326.1	294.7	342.4	345.8	502.2	452.6	498	378.6		353.2	322	459.8	333.4	325.2	472.4	397.4	320
19.75	332.1	300.1	347.2	340.8	505.5	459	498	368.6		349.6	315.9	415.9	338.2	330.2	460	393.6	327.8
19.7667	333.7	308.7	367.8	337.5	512	465.9	498	368.9		352.5	321.2	419.4	338.9	321.4	464.3	405.2	320.2
19.7833	334	304.6	379.2	365.6	513.7	471.2	492.8	357.8		351.2	343.5	415.6	335.5	320.2	462.3	398.1	326.1
19.8	334	309.3	334.1	366.8	505.3	459.8	492.1	375.3		345.8	337	404.7	331.6	323.5	466.4	390.2	322.6
19.8167	334.9	309	320.2	346.2	506.8	460	500.7	375.9		354.6	326.6	417.1	339.7	318.7	468.6	392.6	320.3
19.8333	336.7	309	333.9	349.5	505.2	454.8	494.9	374.3		350.6	323.5	440.4	333.9	319.8	471.5	385.2	321.8
19.85	330.9	300.4	363.4	334.4	507.6	453.2	488.1	372.3		351.8	328.3	408.9	333.1	320	465.9	385.9	317.6
19.8667	331	301.8	406.3	350.5	512.3	450.4	494.9	361.7		354.6	336.7	445.3	334.7	326	459.1	392	330.1
19.8833	327.5	297.6	419	336.2	512.9	441.4	494.1	370.6		346.3	337.8	460.6	332.4	323.4	473.7	397.2	324
19.9	328.8	300.5	352.4	340.4	503.5	452.3	507.9	373.5		353.8	331.9	473.9	332.1	317.9	463.6	393.6	334.4
19.9167	333.3	299.2	329.6	336.6	510	443.4	495.9	376.5		346.2	320.7	434.2	335.5	324.9	456.2	396.5	325.4
19.9333	364.2	304.2	336.9	336.1	505.7	444.8	495.1	364.8		360.7	332.2	432.3	333.3	328.4	459.5	393.5	332
19.95	400.3	300.6	366.4	335.1	507.7	420.8	500.2	378.8		349.7	341.5	431.2	333.9	323.7	472	407.8	325.9
19.9667	366.3	300.9	346.2	336.7	505.4	394.2	511.3	372.9		352.6	340.2	420.6	334.9	317	471.1	401.1	327.7
19.9833	336.6	298.4	324.4	359.4	505	384.5	501.5	380.8		352.9	328.8	405.4	337.6	313.5	465	395.8	320.2
20	321.4	307.6	316.3	363.4	506.7	378.9	496.7	368.9		349.5	324.6	431.9	336.2	325.2	449.4	383	320
20.0167	330.6	302.8	319.5	349.2	505.2	376.4	493.5	352.6		372.4	325	461.4	334.3	329.3	463.8	388.2	323.5
20.0333	339.6	306.4	335.5	355.1	507.6	377.8	505.2	369.4		350.4	331.9	426.5	333.2	323.9	467.4	382.8	317.9
20.05	335.6	299.1	374.8	338.6	514.9	381.4	496.4	383.7		359.6	329.4	419.1	335.6	316.2	466.2	396.8	327.5
20.0667	348.1	305.9	401.8	356.2	512.4	395.8	490.9	389.2		339.2	317.8	444.1	327.3	322.9	471.2	401.3	319.3
20.0833	392.1	306	341.4	370.7	511.2	406.3	491	365.7		339.9	320.6	457	332.2	324.7	475.4	397.6	326.8
20.1	372.1	307.7	327.2	342.4	510.2	394.8	492.7	373.7		346.9	325.3	434.5	334.6	327.6	463.8	397.9	332.2
20.1167	351.3	313.2	351.2	332.5	516.1	392.4	501.6	372.2		333.2	324.2	403.8	341	327.1	463.1	387.6	332.9
20.1333	344.1	307.8	390.8	333.8	499.6	398.1	499.4	357.3		359	325.8	418.7	340.1	325.3	470.8	395.7	322.6
20.15	333.6	310.6	341.7	332.2	511.2	389.4	506.8	364.8		346.9	329.4	407.7	343.5	318.1	471	391.6	331.6
20.1667	334.8	301.4	320.3	345	515.3	413.3	493.1	362.4		360	335.1	410.6	348.3	318	476.2	392.8	324.2
20.1833	344.5	295.9	320.9	345.9	512.5	438.1	499.1	361.2		350.5	337.6	423	343.7	324.9	470	382.6	328.3
20.2	389.9	298.6	354.7	346.8	513.8	458.8	501.6	364.5		352.7	336.2	462.8	335.3	323.3	459.6	385.5	315.1
20.2167	402.1	298.1	395.6	348.7	516.6	459.8	502.8	362.3		361.6	335.2	471.6	329.9	319.6	465.1	380.7	314.1
20.2333	360.5	306.7	359.6	338.6	510	485.1	497.8	378.5		335.1	337.6	414.9	326.5	321.7	458.1	383.6	319.2
20.25	331.5	303.5	328	348.5	511.7	455.6	491.1	371.1		356.6	343.1	419.3	323.5	323.7	471.8	390.9	319
20.2667	327.6	297	328	345.5	522.3	443.8	504	365		340.5	337	422.5	329.1	328.3	474.6	390.1	320.7
20.2833	336.6	300.5	363.5	368.4	509.9	418	498.8	369.3		347	330.1	429.8	339.4	326.3	458.5	389.2	321.8
20.3	365.5	302.7	382.1	369.8	508.3	399.8	493.8	365.6		360.8	323.1	449.9	333.9	319.1	461.5	392.5	331.5
20.3167	404	305.5	358.7	344	516.7	385.3	496.6	370.3		345.4	322.1	457.8	341.8	322.5	458.5	399	324.1
20.3333	379.8	297.3	327.8	348.3	508.3	399.7	494.3	374.4		364.9	326.3	394.8	347.2	326.4	462.4	403.3	327.5
20.35	344.5	300.5	329.7	328.2	518.4	388.7	499.2	365.4		353.8	330.4	398.4	341.8	324.3	468.1	390.1	325.3
20.3667	340.6	295.7	329.1	342.7	516.3	399.3	496.4	360.7		354	323.1	436.1	336.8	323.2	467.1	380.5	325
20.3833	332.3	299.4	353.2	346.4	516.9	407.7	493.5	371.3		351.4	316.1	450.7	336.1	327.3	461.8	391.3	326.7
20.4	334.6	300.8	366	351.2	512.7	420.1	492.2	368.5		346.7	323.8	454.4	336	331.4	474.1	393.6	320
20.4167	360.9	298.4	335.7	357.1	518.1	442.5	500.7	381.9		362.5	343	414.3	329.1	319.8	465.4	394.8	322.6
20.4333	395.6	305.8	323	354.4	510.2	474.1	494	387.2		352.6	332.6	410.6	331.6	322.6	502.2	382.9	320.4
20.45	396.8	303.4	328.2	353.2	522.1	471.4	510.4	368		353.8	333.8	430.8	331.9	322.1	434.6	390.8	323.5
20.4667	356.3	310.8	375.6	347.8	521.2	450.3	504.9	367.1		351.4	330.5	466.4	329.4	330.7	437.5	392.7	322.2
20.4833	332.7	306.7	368.2	333.3	514.1	428.4	502.4	370.5		346.7	337	447	329.9	331.8	448.3	386.9	321.2
20.5	334.7	314.7	336	336.5	504.5	410.8	496	364		353	343.9	404.6	338.6	324.2	477.4	385.3	321.9
20.5167	335.8	308	329.1	346.4	522.2	401.5	500.3	371.8		354.7	337.9	411	342.4	327.5	469.3	385.9	324.6
20.5333	327.3	295	333.3	358.2	512.5	395	493.1	360.7		352.4	339.7	461.2	345.5	327.9	453.5	395.5	326.7
20.55	327	294.1	368.5	356.3	513.8	406.2	490.4	365.3		350.3	336.5	504.3	339	323.7	447.9	390.7	321.8
20.5667	340	303.5	353.4	347.4	510.5	403.4	506.5	363.3		338.8	327.4	441.8	336.4	326.5	463.5	383.2	326.3
20.5833	378.9	303.9	340.1	340.1	522.2	411.7	494.8	351.8		357.1	331.4	410	333.5	325.2	459.6	390.8	316.5
20.6	398	305.7	358.2	357.3	520.3	450.9	495.8	358.9		344	338	410.9	325.3	322.4	458.2	384.9	320.4
20.6167	351.3	302.5	324.3	336.3	520.9	473.5	494.2	367.6		349.2	333.7	430.9	331.1	314.3	451.1	377.2	319.2
20.6333	338.9	301.2	341.3	341.2	520.1	471.3	507	360.2		359.4	327	476.8	340.5	320.1	445.8	383.1	319.9
20.65	334.7	306.2	370.4	364.4	511.4	474.5	506.1	368.7		350.4	320.1	459.7	338.3	330.4	465	379.6	326
20.6667	319.4	306	328.6	359.7	516.2	485.3	502.6	353.4		362.2	325.2	418.5	338.9	331.8	454.6	378.2	317.4
20.6833	338.1	306.9	325.5	356.5	505.7	464.3	503.8	370.3		345.6	332.8	395.6	336.4	325.9	455.8	393.6	320.5
20.7	384.7	305.3	330.3	344.8	519.8	452.8	499.7	377		355.5	333	419.3	341.2	328.6	462.9	389.6	319.2
20.7167	401.4	304.2	335.2	345	511.3	420.1	497.4	359.7		342.1	320.9	438.9	343.6	329.8	474.2	387.4	318.2
20.7333	358.7	298	330.7	339.8	523.1	405.3	492.7	358.2		352.4	316.7	457.1	336.2	329.1	446.4	392.2	326.7
20.75	334.7	298.9	341.3	359.9	516.1	385.2	493.8	367.5		345.1	327.3	457	338.6	323.8	433.9	390.3	317.4
20.7667	341	292.9	340.2	377.3	514.3	403.2	494.8	360.2		351.9	339.1	419.8	335.5	317.9	456.5	390	313.6
20.7833	328	293.9	348.7	355.4	514.9	394.4	495.8	372.1		352.9	338.2	420	335.1	320.6	465.6	398.7	312.2
20.8	336.7	297.4	317	349.9	517.6	388	497.7	381.5		334	333.7	420.9	336.7	327	461.6	386	313.8
20.8167	356.8	299.7	312.7	346.5	510.2	394.1	503.1	366.4		364.3	334.8	418.4	341.3	327	439.5	379.9	319.2
20.8333	391.6	303.4	323.3	339.2	516.1	410.4	503	373		346.7	335.8	443.1	335	326.1	445.1	376.5	316.4
20.85	359.1	301.3	366.3	339	524.7	398.8	497	368.7		377.2	338.6	481.1	335	329.5	456.3	387.3	327.3
20.8667	336.5	298.5	398.9	343.3	522.4	401.6	510	376.7		340.7	329.4	449	341.1	322.1	461.2	388.8	325.3
20.8833	334.3	298.1	341.9	371.6	524.6	424.4	503.1	369.2		356.5	332.5	416.1	341.9	331.5	436.8	382.1	319.9
20.9	335.8	304.9	322.1	369.3	518	458.6	496.1	367.3		346.6	334.7	411.7	343.7	328.5	450.8	385.5	329.5
20.9167	339.4	295.5	330.7	364.7	533.6	454.6	499.5	365.3		353.9	337.5	413.7	335.3	326.3	452.7	384.2	318.7
20.9333	388.3	291.6	331	343.3	527.9	460.1	500.8	359		351.4	337.9	447.7	331.6	330.4	470.3	390.9	316.4
20.95	415.7	296.3	324.9	368.1	524.5	469.5	497.5	355.5		346.7	329.3	449.7	342.3	327.5	461.4	391.9	315.2
20.9667	400.4	299.5	318.1	359.4	513.7	470.8	500.5	366.3		358.2	323	396.3	331.7	323.6	463.6	398.9	309.8
20.9833	350.8	297.3	324.1	359.1	527.8	468.4	501.8	366.9		351.1	330.8	407.3	343.2	324.8	464	394.7	316
21	338.9	296.2	351.7	346.9	514.1	462	496.8	373.9		370.9	336.2	398.4	331.8	326.7	455.3	387.2	307.4
21.0167	343.3	303.8	371	354.8	520.1	462	501.3	369.7		339	329.1	417.1	332.8	337.3	462.8	381.8	320.9
21.0333	333.5	304.8	324.3	355	516.6	458.5	513.1	373.4		359.8	324.7	474.9	333.8	328.4	456.1	380.2	320.1
21.05	332.2	305	351.7	339.4	517.8	449.4	513.9	372.2		338.3	326.7	481.9	334	323.7	454.3	378.3	324.3
21.0667	345	305.9	347.6	343.4	519.7	452.5	511.4	370.3		342.4	339.1	417.1	329.7	327.4	457.5	376.3	317.1
21.0833	390	301.7	317.7	364.7	516.5	433.9	508.5	372.6		354.2	347.7	441.2	335.1	326.2	449.3	389.9	326.5
21.1	378.8	313.2	330.1	357.2	507.4	409.8	511.5	367.8		341.1	331.5	437.6	342.8	324.3	449.9	388.3	314.8
21.1167	338.3	307	376.7	357	499.3	400.5	505.9	375.7		366.1	328.5	424.1	341.2	329.2	458.6	395	318.4
21.1333	339.8	307	379.6	346.6	518.1	386.2	497.3	370.8		347	335	422.3	339.3	332.5	463.3	394.1	316.3
21.15	335.6	303.5	344.5	358.2	518	384.3	504	355.4		367.8	340.2	419.4	338.2	332.1	468.2	385.4	322.1
21.1667	339.4	297	326.8	342.5	521.5	398.7	504.9	356.8		355.9	340.9	435.5	334.6	320.8	452.5	387.6	328.9
21.1833	349.4	302.2	341.7	345.5	522.8	393.8	506.7	362.2		357.7	337.5	453.2	328.9	325.3	447.7	388	321.2
21.2	400.1	307.2	331.6	361.5	517.8	391.4	494.9	370.7		361.4	331	447.8	337.6	330.2	448	394.9	327.1
21.2167	414.7	303.6	324.2	349	519.7	400.6	492.4	359.7		361.1	334.5	416	337.1	339.5	459.2	388.1	320.1
21.2333	369.1	303.9	332.7	350.7	524.3	397.5	498.1	364.3		364.5	343.6	411.7	339.6	332.2	468.5	385.4	313.1
21.25	344.8	305.7	369.3	364.8	521.4	395.3	504.9	366.6		334.7	336.2	441.4	371.1	317.3	460.3	390.2	316.5
21.2667	339.8	306	356.1	337.3	533.2	414.1	504.1	373.9		357.4	316.1	423.8	397	317.9	454	386.6	316.9
21.2833	336.5	298.2	329.2	353.5	512.3	427.8	496.2	362.7		341.5	314.3	417	385.8	331.8	451.4	379.2	323.9
21.3	336.9	304.1	322.1	361.7	517.2	455.6	501.2	378.5		354	319.2	451.6	348.8	330.2	468.3	385.9	314.5
21.3167	362.9	316.1	312.5	352.4	515.3	474.1	497.6	384.1		347.1	332	460.6	345.5	325.7	462.9	406.7	324.4
21.3333	394.1	308.2	315.5	343.4	517.6	480.1	505.7	381.4		343.6	340.6	441.9	334.7	319.9	444	387.9	323.2
21.35	382.8	308.9	325.4	343.1	521.4	481.7	498.2	385.4		351.7	340.1	434.2	335	321.7	438.8	394	320.4
21.3667	341.5	302.9	364	362.9	526.2	482	506.7	369.5		341.6	333.1	438.4	343.6	326.3	443.3	387.1	323.5
21.3833	332.4	309	398.6	373.4	518.3	462.1	497.4	374.3		364.4	325.2	443.2	339.6	326.9	465.5	392.2	319.6
21.4	331.2	317.7	347.9	349.7	520.6	475	502.2	362.8		345	327.6	440.4	345.1	331.3	458.2	390.3	332.9
21.4167	331	311	333.3	348.2	531.3	454.2	511.5	378.5		358.8	345.2	419.3	341.6	330.2	451.1	390	320.9
21.4333	341.4	304.1	340	337.7	510.3	420.3	505.9	372.9		360.7	340.7	437.2	343.7	319.6	444.1	401.2	322.7
21.45	385.1	304.9	367.7	331.9	517	405.3	515.5	381.6		347.1	336.6	456	344	317.4	453.5	387.2	319.5
21.4667	391.1	311	386.1	340.6	509.2	396.4	504.7	375.9		361.7	329.2	405.9	343.1	322.2	475.6	393.9	319.1
21.4833	346	305.8	341.9	364.3	518.5	395.2	499.8	364.7		340.3	335.1	414.6	338.7	329.8	460.4	378.4	325.1
21.5	333	306.8	331.6	357.1	509.4	404.5	495.6	375.3		356.5	349.7	454.7	340.7	329.1	452.3	388.4	313.8
21.5167	332.1	307.8	344.9	348.4	524.6	411.9	502.9	372.5		356.9	346.5	417.8	341.8	325.6	455.5	380.3	326.9
21.5333	327.7	307.1	360.6	346.3	518.9	441.4	490.9	372.1		352.7	329.6	398.1	331.6	326.8	462.8	379.2	316.6
21.55	343.5	312.2	336.7	337.4	512.1	455.8	493.6	366		364.2	326.5	420.5	335.4	328.7	460.4	383.3	327.3
21.5667	380.3	304.2	324.9	360.4	523.2	459.4	494.8	364.3		349.3	333	407.1	345.4	332.4	443.6	388.2	320.1
21.5833	389.5	302.3	325	352.3	521.3	469.4	501	368.4		360.3	339.1	431.2	346.8	332.1	450	382.8	326.1
21.6	342.4	304.6	331.1	356.4	524.5	476	501	360.3		357.4	337.3	437.1	350.4	324.2	443.1	391.6	326
21.6167	331.7	301.5	340.5	359.5	517.2	471.7	494.9	376.5		358.8	323.2	456	344.9	325.8	450.8	391.1	315.6
21.6333	331.1	300.2	374.7	340	519.6	467.6	509.7	356.2		352.9	326.5	424	340.7	324.2	455.3	384.1	328.1
21.65	331	305.2	376.7	341.7	521.7	448.1	509.1	363.8		348.7	329.5	417.1	337.5	324.9	458.5	391.8	323.7
21.6667	332.7	312.8	325.1	354.9	522.8	423.8	506.4	378.7		355.9	338.6	426.5	335.3	324.1	461.5	398	322.2
21.6833	330.4	312.1	321.6	357.6	520.4	409.3	495.7	361.7		348.2	338.9	465	331.6	329.2	451.6	383.3	324.6
21.7	363.8	313.7	321.9	348.4	517.5	397.8	504.6	377.5		361	331.2	470.2	336.3	330.8	448.5	377.9	326.7
21.7167	393.4	303.6	324.6	352.4	513.6	386.7	497.2	388.3		353.2	326.7	415.6	328.3	328.4	449.8	371.9	329.6
21.7333	354.1	302.2	333.6	355.5	518.3	395.6	497.9	370.7		348.7	330.4	407.3	333.2	322.9	469.9	384.1	319.6
21.75	332.4	309.8	351.2	337.8	506.8	398.5	498	362.3		355.9	342.2	413.1	327.8	320.4	461.3	386.6	325.1
21.7667	324.3	312.6	370.1	338.8	511.3	397.2	489.4	368.1		352.5	343.8	447.6	337.5	324.4	439.4	400.8	326.7
21.7833	316.3	310.3	339.7	332.9	513.6	412.6	499.4	381		357.3	341.4	461.8	341.4	323.2	451.2	385.4	327.8
21.8	324.7	308.3	317.5	343.4	519.1	426.8	489.5	381		357	342.8	444.7	341.1	324.8	445.8	389.4	327.1
21.8167	341.4	312.4	316.2	367.3	514.7	441.7	499.4	379.3		356.1	341.2	401.7	344.5	325	460.7	380.4	324.4
21.8333	366.1	312.9	312.6	361	507.2	463.6	499.9	379.9		360.3	336.7	426.2	336.3	329.3	461	390.4	331.8
21.85	392	308.7	352.7	374	509.6	441.5	500	375.7		360.9	335.2	433.8	336	328.2	454.1	387.5	333.7
21.8667	355.7	317.6	391	353.2	509.9	433.3	496.5	375.1		356.7	323.8	410.6	333.4	329.8	448	385.3	326.2
21.8833	340.4	312.8	362.5	345.3	516	419.2	503	372.4		356.1	318.8	420.5	332.2	330.8	444.5	392.8	338.1
21.9	325.4	311.2	324.9	364.9	515.1	402.6	494.4	366.9		354.3	322.4	462.4	332.9	332.7	458.8	389.5	324.2
21.9167	339.7	308.4	333.6	357.2	519.3	405.5	494	370.4		346.3	324.7	421.4	338.2	324.3	459	384.7	333.5
21.9333	364.2	310.7	320.1	347.5	513	396.4	494	380.4		360.7	331.9	445.3	339.8	313.7	436.5	389.3	322.7
21.95	398.6	315.3	331.3	346.2	512.1	417.7	493.1	380.9		345.4	332.8	459.7	340	319.1	455.1	387.3	338.5
21.9667	379.1	313.3	319.8	346.9	512.9	450.8	495.6	376.7		352.8	322.6	431.4	346	326.8	452.4	388.8	323.4
21.9833	335.8	304.4	322.6	345.3	520.8	460.5	494.2	356.2		360.8	326.4	445.8	342.5	337.3	453.8	415.8	331.7
22	338.6	304.1	329.9	344.2	518.4	459.2	500.1	360.4		341.9	344.2	465	341.2	329.3	456.6	407.3	334.6
22.0167	333.8	305.7	326.5	358.7	518.9	466.8	494.8	357.5		365.3	339.7	470.2	340.2	322.1	450.9	401.9	330.6
22.0333	327.9	307.7	316.6	358.1	519.9	464.4	495	367.4		346.9	328.7	420.7	333.1	324.6	460.5	390.7	337.9
22.05	336.6	308.8	316.9	365.8	525.2	452.8	493.3	375.7		367.7	328.1	419.2	337.3	332.7	466.1	391	329.3
22.0667	334.4	307.2	349.8	357.3	514.6	440.9	499.1	368.2		352.4	341.8	464.9	330.1	333.8	466.9	388.4	336.8
22.0833	332.3	309.6	394.1	348.4	532.2	430.6	498.1	379.3		363.3	348.9	429.5	336.1	332.2	445.4	374.2	329.2
22.1	339	309.9	354.2	340.3	525.1	412.8	499.7	370.4		373.4	331.7	403.1	338.6	315.6	445.9	383.5	333.3
22.1167	336.4	307.4	329.8	336.6	511.2	400.9	508.6	368.3		358.4	333.7	429.8	341.5	317.7	450.3	377	323.5
22.1333	335.2	303.6	339.5	336.9	524.9	391.5	516.7	364.6		357.2	333.1	416.1	341.9	321.4	463	384.8	336.9
22.15	339.3	297	329.6	346.5	518.9	400.6	497.1	374.5		344.9	346.8	406.5	346.3	330.6	463	385.8	326.6
22.1667	371	310	355	372	521.6	406.1	495.3	374.1		344.1	340.1	415.6	340.9	327.5	453.5	383.4	331.3
22.1833	371.9	318.6	378.3	368.5	516.8	396.5	492.4	380.1		350.9	325.3	471.3	340.1	331.4	448.7	380.5	330.2
22.2	354.7	310.3	332.2	362	527.3	401.3	497.2	383.5		350.1	307.7	465.9	336.6	318.9	467.1	389.6	331.8
22.2167	338.5	305.7	336.4	341.3	523.6	400.2	494.4	370.1		357.8	318.3	438.3	344.7	323.3	462.7	394.3	331.1
22.2333	336.3	303.4	351.6	341	529.1	415.6	494.1	364		356.2	340.5	440.6	336.3	329.1	457.8	379.3	331
22.25	330.9	306.5	367.5	360.9	521.2	441	492.3	374.4		363.8	352.2	441	334.3	328.1	448.5	388.6	337.9
22.2667	337	308.7	332.5	390.4	513.2	447.9	499.8	373.2		351.9	333	471.3	339.2	320.2	459.3	387.2	325.9
22.2833	375	309	345	362.4	517.4	446.3	513.8	366.1		350.3	317.4	470.2	339.9	318.3	461.6	381	339
22.3	381.1	307.3	362.3	343.9	521.4	446	509.7	387.6		369.9	323.1	420.7	345.2	320.6	448.1	387.9	328.6
22.3167	349	304.4	375	355.2	518.5	427.8	503	368.1		348.4	339.4	395.9	342.4	327.9	453.2	385.4	328.9
22.3333	347.3	304.1	329.2	343.8	511.1	422.8	505.6	366.3		349.8	347.7	421.9	346.4	327.1	464.3	381.6	327.3
22.35	337.5	304.9	323	334.5	514.5	396.2	504.2	373		366.4	341	428.9	338.3	327.9	460.6	392.3	331.4
22.3667	327.6	298.9	336.8	340.1	522.7	392.6	500.6	366.1		354.8	336.7	428.1	342.4	324.5	460.9	392	331
22.3833	355.6	302.4	324	358.2	522.1	403.3	495.8	374.7		352.4	333.5	436.7	340.3	329.3	453.2	393.7	330.1
22.4	385.3	309	316.2	357.2	529.8	414.3	498.6	364.6		365.9	338.3	446.5	337.4	325.6	453	395.7	329.2
22.4167	363.4	309.9	317.8	356.2	533.4	435.7	505	368.4		354.7	349.3	441.7	340.5	325.1	455.6	385.6	331.6
22.4333	343.2	309.1	350.8	365.5	524.4	458.4	499.8	365.5		355	338.7	413.4	340.9	326.7	455.9	398	340.6
22.45	328.3	303	393.3	346.9	512.8	469.3	488.7	371.1		351.5	329.4	423.4	336.7	326.1	469.8	398	334
22.4667	328	306.5	340.3	337.5	522.5	464.7	505.4	381.4		350.2	317.8	451.6	331.8	327.7	467.4	397.1	340.9
22.4833	341	313	327.9	343.1	522.9	464.1	500.7	375.9		355.2	324	464.9	336.3	323.6	447.2	380.6	337.5
22.5	334.1	307.8	345.3	355.1	521.3	462.3	497.5	375.1		350.7	325.7	420	342.1	324	478.2	390.5	335.3
22.5167	325.4	308	336.4	375.8	522.8	462.9	498.8	357.7		365.7	334.6	415.7	346.3	324.9	479.7	394.4	333.3
22.5333	330.2	304.5	347.3	370.8	526.4	448.3	502.4	366.6		351.3	330.6	419.4	342.6	328.4	473.9	381.9	339.1
22.55	358.6	302.3	328.9	357.1	518.3	424.7	493.4	380.8		356.2	323.2	432	342.9	323.7	444.6	387.2	333
22.5667	394.4	296	329	338	527.5	408.5	498.2	376.6		370.7	323	464.9	339.5	328.3	445.8	382.7	335.6
22.5833	362.1	307.2	327.3	347.5	534.9	407.2	495.4	375.2		361.5	339.4	472.8	341.7	323.7	472.8	396.8	328.2
22.6	344.7	304.4	336.5	351.4	535.8	394.1	495.9	369		374	339.9	467.8	336.8	318.8	473	392.6	332.3
22.6167	337.2	294.5	374.1	354.5	524.7	389.7	496	376.8		348.1	332.2	430.8	339.6	318.1	461.8	388.6	331.2
22.6333	330.1	296.7	396.5	342.8	521.5	399.5	495.1	366.6		352.3	323.4	427.5	337.3	320.6	436	389.8	331.9
22.65	335.2	307.3	335.5	343.8	533.2	412	491.6	364.4		346	329.1	432.3	329.3	325.3	441.2	389.1	338.9
22.6667	344.5	307.9	328.2	362.1	531.3	431.9	498	373.6		349.5	343.7	410.4	336	325	465.2	382.1	331.2
22.6833	374.3	306.3	330.6	344.7	531	451.9	497.1	367		362.9	344.8	443.8	342	318.1	481.5	385.5	339.7
22.7	400.9	301.7	330.9	347.6	531	460.6	491.8	371.3		357.8	343.2	450	341.1	325.8	467.2	389.4	327.9
22.7167	366.4	295.9	372.5	359.2	518.9	460.1	498	371.9		368.3	334.4	425.8	334.1	332.9	435.9	378.7	339.2
22.7333	339.2	302.9	371.2	356.4	519.9	449.6	513.6	363.3		354.2	327.1	405.2	340.1	334.7	440.3	393.7	336.4
22.75	336.4	303.9	325.2	338.8	516.5	457.7	503.6	366.5		371.3	332.2	441.3	340	328.9	458.2	387	342.1
22.7667	337.8	304.8	320.7	340.7	518.7	441.5	501.3	368.7		352	338.1	422.9	339.1	318.6	470.1	380.1	333.4
22.7833	324.1	302.4	327	350.5	516.4	443.7	500.2	379.3		365.8	334.6	424.7	337.3	328.5	457.9	386.1	342.6
22.8	340.4	304.6	318.4	358.7	513.5	444.8	500.9	369.5		348.7	326.3	464.7	339.6	335	459.7	388.6	340.3
22.8167	390.2	309.3	346.6	351.2	513.9	432.9	490.6	369.1		371.4	333.8	429.5	334.8	328.1	458.2	388.9	340
22.8333	365	306.4	397.1	354.5	520	427.8	493.5	368.1		399.6	327.9	412.6	336.7	326.3	450.2	392.5	333.1
22.85	358.1	313	417.8	338.5	514	428.8	483.6	374.1		372.3	329.7	418.1	341.3	322.6	457.8	390.3	332.1
22.8667	342.4	304.4	341.9	354.5	518.3	437.6	498.6	373.1		362.5	330	425.8	346.2	324.7	451.9	395.2	332.9
22.8833	326.5	294.5	328.1	370.5	532.7	429.3	491.2	368.7		371.6	333.5	432	349.5	331	467.6	383.8	328.7
22.9	333	298.4	329.7	398.6	530.4	423	501.4	369		360.7	337.4	459.7	350.8	326.7	458.4	386.6	343.7
22.9167	374.5	300.6	374.1	361.8	518.8	432.5	503.6	382		357.5	339.6	465.1	350.1	323.5	459.8	388.7	337.9
22.9333	394	308.7	383.5	353.3	517.2	415.6	517.8	369.9		368.3	333	445.1	340.5	319.6	462.6	378.6	343.2
22.95	364.6	316.7	332.1	339.2	524.8	413.4	502.4	363.1		352.5	338.2	417.3	335.7	323.4	454.3	385	343.9
22.9667	338.1	310.9	334.6	343.4	516.3	394.9	498.6	363.9		354.7	336.3	413.6	340.3	327.4	468.7	391.1	344.8
22.9833	324.2	308.4	360	361.2	529.9	382.9	503.3	370.9		356.7	341.2	414.8	334	332.2	457.7	391	342.4
23	330.9	304.6	360	361	523.9	389	497.8	361.5		357.8	336.7	438.3	340.9	332.9	469.2	397.1	345.5
23.0167	356.1	305.8	322.8	356.7	538.7	374.3	494.5	391.3		402.9	329.2	439.8	341.9	326.1	469.9	393.5	345.1
23.0333	394.9	307.7	329	354.4	519.9	382.7	494.9	370.3		377.9	341.1	443.4	342.8	320	466.5	390.5	339.8
23.05	368.2	303.6	350.6	352.3	533	388.1	493.3	375.2		364.2	344.5	408.5	340.4	324.3	465.2	395.3	346
23.0667	342.1	308.3	369.1	345.1	535.6	389.7	497.4	381.1		373.5	351	399.4	342.6	332.7	459	393.3	342.5
23.0833	326.4	308	337	337.2	524.7	401.2	504	371.5		352.3	340.6	438.8	346.4	329.5	448.6	400.8	342.9
23.1	334.7	305.4	318.8	331	532.7	425.2	516.1	369.3		359	332.3	468.4	346.1	323	459.3	398.4	336.9
23.1167	335	312	322.4	342.2	534.7	434.5	503	377.7		359.9	335.5	439.5	341.7	327.3	463.4	392.9	346.5
23.1333	343.6	299.9	317.7	360.2	539.3	450.5	495.2	370.2		394.6	323.8	414	341.1	321.9	468.2	383.5	345.2
23.15	376.8	306.9	332.7	368.7	518.3	443.2	501.1	372.6		360.4	312.7	431.3	334.1	329.8	452.5	393.4	347.6
23.1667	400.3	307.9	377.1	377.6	536.2	429.2	504.5	384.2		377.3	315.6	428.4	330.6	328.2	460.7	395.7	345.4
23.1833	362	313.2	415.1	352.9	529.1	433.3	499.7	370.2		357.2	336.7	433.2	336.1	326.3	462.7	392.5	346.8
23.2	323.1	314.8	370	346.1	528.2	437.4	495.6	378.7		353.6	372.4	459	331.7	324.3	457.8	390.3	345.2
23.2167	324.7	312.4	338	338.2	528.9	442.2	496	366.9		360.9	358.2	461.6	333.7	322.3	458.8	396.1	347.6
23.2333	328.4	306.9	322.4	348.4	525.5	433.4	498.6	366.1		353.2	323.4	433.4	342.6	323.8	458.1	394.3	339.3
23.25	358.3	312.2	347.1	365.3	522.5	409.7	500.7	359.1		363.4	334.3	400.2	348.1	320.5	453.7	399.2	341.6
23.2667	381.4	318.1	330.6	355.5	526.4	403.9	498.4	384.1		359.6	345.3	449.3	348	324.4	454.8	390.4	342.8
[truncated: 404 more rows]

## Sheet: VMS Blood flow data (Fig 2a)
Source data for Figure 2A-C
Time (minutes)	Old mice								Young mice
	O1	O2	O3	O4	O5	O6	O7	O8		Y1	Y2	Y3	Y4	Y5	Y6	Y7	Y8
-10	261.2	235	441.6	266.7	208.5	346	293.6	430.9		267.9	342.3	267.7	352.2	258.4	309.3	241.6	299.3
-9.98333	266.2	224.8	445	260.1	203.2	354.4	282.6	425.7		250.2	331.8	282.9	343.3	260.3	314.5	244	304.7
-9.96667	272	235.4	451.4	261.7	207.7	374.5	288.7	420.8		247.7	332.8	273.8	350	264.7	327.9	234.4	300.2
-9.95	278.6	222.9	464.8	268.4	212	359.2	276.7	424.2		255.4	323.4	286	342.6	261.4	315.2	243.7	300.6
-9.93333	271.6	232.7	441	256.9	206.2	357.3	269.7	434.7		252.9	332.9	279.1	342.2	261.6	333.2	249.2	304.5
-9.91667	277.9	233.9	445	274.3	206	358.6	281	413		267.9	339.8	287	346.9	267.7	313.7	250.7	292.4
-9.9	264.8	235.8	453.3	262.8	207.3	354.3	280.6	436.6		252.2	320.7	279.1	350.3	244.8	310.7	251.2	296.6
-9.88333	279	237	434.6	277.6	207.8	348.4	274.1	421.7		261.2	326.2	274.1	352.5	263.2	321.5	250.2	298.7
-9.86667	276.8	237	430.4	254.8	201.5	352.3	279.5	418.3		269.6	342.9	287.9	346.8	262	327.5	248.5	298.1
-9.85	272.7	227	440.4	272.3	209.9	340.8	287.7	424.4		257.3	358.6	280.3	357.6	251.5	323.5	252.1	291.1
-9.83333	277.7	233.1	431.1	251.2	214	347.6	279.1	425.5		256	333.6	271.1	381.3	248.7	330.2	242.9	307
-9.81667	273.6	225.8	428	255.6	211.7	355.6	293.3	415.2		245.3	337.8	278.5	378.4	271.8	329.8	243.7	299.8
-9.8	266.8	231.7	426.6	262.2	209.9	363.2	276.2	490.4		245.1	340.2	286.6	370.9	253.7	343.2	254.9	299.8
-9.78333	270.7	230.3	426.3	260	205.8	351.1	275.4	509.6		251.1	341.7	281.4	363.1	261.4	301.6	251.3	298.6
-9.76667	267.1	226.4	456.6	252.8	207.4	354.9	270.4	445.5		257	339.5	276.7	387.1	253	324.2	254.3	294.2
-9.75	264.6	222.6	494.8	248.9	212.2	351.3	268.3	430.6		260.1	346.6	276.4	367	250.3	325.1	249.8	300.6
-9.73333	280	233.3	446.3	259.3	212	344.7	271.6	481.2		256.2	330	279.1	355.3	253.4	316.4	240.2	293.6
-9.71667	293.3	229.3	451.4	266.4	206.9	342.8	273.3	469.6		256.6	342	280.3	357.7	243.9	319.3	244.6	291.1
-9.7	275.5	226.7	431.4	254.5	211.4	350.5	281.8	499.1		256.1	336.7	280.5	336.8	252.8	316.1	243.6	300.2
-9.68333	274.5	218.4	453.5	267.6	213	343.1	270.2	452		253.4	338.6	278.1	344.2	255.3	297.9	246.4	287.2
-9.66667	268.6	235.8	434.1	273.5	201.8	353.4	289.8	468.8		256.2	335.6	281.2	360.4	269	325.4	240.1	292.9
-9.65	271	224	434.6	262.7	210.3	341.5	287.4	451.8		259.6	347.7	279.4	354.4	260.3	310	245.4	296.1
-9.63333	281.4	228.9	440.9	267.7	206.6	353.2	273.8	418.9		252.6	331.9	280	335.7	268.4	311.9	247.2	283.8
-9.61667	277.1	222.2	455	263.8	205	355.8	280.6	413.5		254.2	323.6	282.6	339.6	251.6	324.2	252.7	306.4
-9.6	285.9	223.3	475.1	260.7	210.3	347.4	280.1	461.5		258.3	329.5	282.8	355.5	260.6	302.5	256.3	301.1
-9.58333	289.7	234.2	452.5	260.5	203.4	353.4	291.4	488		250.9	334.9	281.6	359.1	255.6	328.2	249.6	301.5
-9.56667	260.7	225.1	455.2	267.2	213.5	349.9	285	421.6		263.6	331.2	279.4	344.1	267.3	315.6	252.1	291.2
-9.55	251.4	231.8	443.9	272.7	209.8	352.7	290.6	411.5		269.6	346.2	288	339.3	271.7	309.2	239.4	294.9
-9.53333	267.7	224.6	433.5	274.2	211.2	363.3	280	473.2		256.7	337.8	280	339.7	268.5	328.5	245.1	303.1
-9.51667	282.8	225.6	436.3	339.8	209.2	333.3	283.5	493.1		259.4	344.5	281.4	352.2	252	332.6	246.1	289.2
-9.5	280.6	222.2	459.7	331.7	204.6	370.7	278.2	461.5		256.7	346.4	280	340.3	271.2	324	241.4	307.5
-9.48333	267.1	233	464.3	261.9	202.3	353.8	290.4	426.8		267.8	324.5	286.9	342.5	269.6	321.3	250.8	296.9
-9.46667	266.6	228.3	446.2	281.3	209.7	355.2	286.2	444.9		257.7	336.6	273.9	337.6	275.8	315.9	248.5	285.1
-9.45	256.9	231.9	466.9	272.9	209	351.1	276	407.6		253.1	337.4	266.2	372.3	252.6	316.6	239.9	285.8
-9.43333	276.7	226.8	438.1	260.7	207.1	326.4	284.5	455.4		252.1	333.4	265.6	338.2	266.8	313.9	233.1	296.2
-9.41667	268.4	232.9	441.3	261.2	201.9	351.9	289.6	463.4		244.1	333.6	278.5	393.6	261.9	325.6	256.4	297.7
-9.4	270.6	241.2	446.6	253.4	201.4	335	293.4	424.2		247.4	335.5	250.4	356.3	263.1	324.9	245.4	291
-9.38333	268.9	223.2	457.3	256.6	206.4	335.6	293.8	448.2		252.5	320.6	253.8	327.7	264.4	311.2	256.6	297.9
-9.36667	271.9	233.4	460.6	269.7	206.9	343.3	303	424.4		250.8	333	262.4	324.3	277.8	331	262.1	305.1
-9.35	250.4	233	468.3	258.1	204.6	358	295.9	428.3		258.3	334.8	274	355.8	265.1	312.6	250.1	300.2
-9.33333	266.8	232.2	443.7	259.7	211.2	357.9	268	439.1		259	324.1	270.5	350.9	261.1	308.4	244.2	299.5
-9.31667	264.1	220.2	454.4	264	199.7	337.8	280.3	404.3		250.7	337.2	278.3	359.8	264.8	328.9	266.5	291.5
-9.3	285.9	220.1	438.6	268.7	203.3	343.9	292.8	423.5		254.8	346.8	266.2	363.6	257.5	315.5	241.2	301.1
-9.28333	270.7	225.8	441.6	268.8	220.2	334.5	293.7	471		252.9	346.9	288.7	339.6	250.3	319.4	260.7	301.7
-9.26667	258.8	231.7	446.2	262.8	209.7	349	287.1	435.9		244.5	328.8	274.4	339.6	279.8	310.2	251.6	305.2
-9.25	262.2	222	434.7	259.8	214.1	349.5	283.1	493.8		249.9	329.1	288	332.9	258.7	306.1	238	297.5
-9.23333	261.6	223.3	437.3	265.5	209.3	349.7	267.6	425.6		272.3	329.7	273.8	391.1	265.6	315.3	245.5	299.7
-9.21667	262	224.2	435.3	260.1	210.9	342.8	275.9	426.2		263.9	318.1	272.9	344.5	270.8	314.1	249.6	284.4
-9.2	260.9	233.8	436.9	248	210	357	261.5	426		256.8	333.1	283.4	366.8	256.8	326.6	248.3	299.1
-9.18333	269.2	219.4	455.6	246.2	205.5	364.8	273.5	430.9		258	336.6	279.1	342.6	268.9	338.1	243.5	306.9
-9.16667	267.6	231	477.8	259.4	203	338.9	274.2	433.1		257.5	327.2	291.2	399.7	261.4	305.4	254.6	307.9
-9.15	249.8	225.9	469.6	258	197.6	335.5	278	433.5		266.9	327.5	292.8	400.7	258.1	317.4	240.9	298.1
-9.13333	259.9	228	454.1	270	205.2	342.5	263.8	440.6		257.7	358.9	271.9	335.4	266.8	304.4	246.7	294.4
-9.11667	250	232.1	428.7	265.3	199.6	327.2	273.6	503.7		251.5	338	277.3	358.3	262.3	313.7	230	297.7
-9.1	264.9	227.8	445.3	268.9	210.4	341.6	264.2	440.3		250.7	337	292	332.9	266.1	318.3	246.6	281
-9.08333	270.4	237.4	428.7	273.7	215.4	357.1	278	475.4		247.1	320.3	284.8	374.2	265.3	313	244.6	298.6
-9.06667	271	226.1	433.4	266.5	211.5	343.3	284.1	395.8		249	330.7	277.2	366.5	247.7	307	259.4	299.7
-9.05	260.7	223.8	449.3	272.7	216.2	350.2	280.7	412.6		252.6	322.4	280.9	359.3	264.3	331.2	238.5	297.9
-9.03333	281.7	232.8	435.6	265.8	215.4	338.1	286.8	419.6		259.4	324.5	281	353.8	249.9	322.1	245.3	301.4
-9.01667	263.5	222.3	445.2	266	215.1	331.9	274.8	410.4		266.5	328.1	275	337.3	272.5	336.2	246.7	291
-9	270.7	233.9	468.7	275.3	206.5	349.4	284.6	454.6		250.1	330.5	270.7	332.2	258.2	328.2	244.6	320.2
-8.98333	267.5	231.4	460.8	268.9	206.4	348.1	289.9	461		265	326.9	268.1	341.2	261.9	338.6	240.7	299.3
-8.96667	278.3	224.8	454.6	269.2	206.7	355.4	280.3	475		254.1	329	270.3	337.7	267.6	336.4	244.1	303.2
-8.95	271.4	222.5	444.8	262.5	200.1	338.8	272	445.2		269	321.2	264.6	366.6	266.4	333.4	249.5	310.6
-8.93333	261.6	224.4	467.1	264.6	206.3	350.3	280.9	491.4		251.5	312.8	271.2	396	268	334.4	254.4	310
-8.91667	260.2	239.5	430	280.3	203.8	353.2	270.8	427.9		252.8	325.2	266.4	435.1	258.3	310.7	254.5	299.6
-8.9	261	233.9	446.4	263.6	209	349	294	409.5		258.1	316.2	277.4	412.5	277.5	321.8	250.5	299.7
-8.88333	273.6	226.3	449.8	256.9	202.6	350.5	291.1	421.6		250.3	341.3	276.8	400.8	262.5	319.3	259.7	302.9
-8.86667	267.3	231	463	252.2	206.3	343.1	272.4	418.8		259.7	331.8	268.3	373	284.8	326.6	242.1	301.9
-8.85	265.9	233.2	454.7	266.5	210.6	336.3	279.6	402		263.6	337.1	264.2	360.5	260.5	315.9	251.1	299.4
-8.83333	275.3	225.2	435.8	261.1	212	347.2	272.8	419.3		267.3	319.7	276.8	345	271.5	318.6	244.1	299.7
-8.81667	268.3	235	428.9	261.8	206	352.5	276.2	436.1		257.9	329.9	281.1	347.9	273.8	300.4	253.8	296.2
-8.8	284.2	228.6	447.6	260.8	208.3	351.1	274.7	456.9		271.9	321.7	280.7	350.7	258.1	312	250.8	295.8
-8.78333	278.6	227	448.9	266.3	217.4	340.8	279.9	419.2		257.1	328.1	288.7	343.3	276	330.6	251.2	295.3
-8.76667	272.5	237.2	449.3	266.1	206.7	334.8	306	410		261.3	331	285.7	387.7	261	323.3	262.1	311.3
-8.75	261.8	227.9	441.8	264.7	209.3	347.8	302.4	409.5		253.5	322.7	268.4	343.9	260.3	337.7	245.7	297.9
-8.73333	271.3	222.4	449.2	263.5	207.6	345.1	291.2	421.8		257.9	355.6	275.6	350.2	277.9	308.2	256.7	297
-8.71667	250	227	438.3	250.6	203.6	346.6	274.3	424.8		276.4	328.9	282.9	352.1	269.7	310	250.6	304.3
-8.7	260.1	224.2	448.5	251	204.5	338.5	268.2	400.2		259.5	320.1	295.5	379.5	261.2	305.8	256.4	300.5
-8.68333	273.4	238.5	459.4	258.1	206	337.7	266.4	439.2		257.5	333.7	290.1	370.6	269.2	318.3	242.1	296.3
-8.66667	266	230.6	479.1	265.6	210.6	332.9	265.3	400.1		270.9	341.3	285.2	346.7	270	315	254.2	297.6
-8.65	264	227.7	444.1	255.1	213.7	342.2	278.7	432.5		259.6	335	274.7	339.1	260	318.8	249.7	298.4
-8.63333	258.9	228.2	427.9	269	217.3	339.4	285.9	390.1		264.4	327.9	264.3	372.8	283.9	296.8	249.2	308.4
-8.61667	267.1	228.6	431	274.6	216.7	336.5	277.4	429.3		272.2	349.3	265.7	361.9	281.3	321.8	239.6	305.3
-8.6	263.6	226.6	428.2	268.7	204.6	339.1	276.8	467		255.7	326	270.7	348.4	255.1	334.2	259.7	303.2
-8.58333	271	226.8	440.3	265.2	203.6	331.1	276	406.8		253.8	334.2	268.7	369.7	251	324.7	256	299.4
-8.56667	263.7	235.2	445.5	260.5	207.7	341.7	278.9	408		259.6	337.4	276.2	362.3	263.9	321.2	240.2	293.5
-8.55	262.4	226.8	460.3	249.9	212.1	333.8	273.1	408.9		259.7	328.8	269.9	353.6	263.1	321.6	255.3	294.6
-8.53333	265.5	237.9	451.3	252.8	215.7	342.7	278.8	444.7		256	341	270.9	346.3	254.4	307.8	264.1	306.8
-8.51667	268.3	234.5	448.4	254.2	209.7	355.5	279.6	450.3		266.3	342.6	276.3	365.4	261.4	336.4	243.4	294
-8.5	260.1	231.5	440.8	266	212.8	343.2	288.1	462.7		261.3	330.9	275.1	336.9	241.7	312.8	249.8	291.5
-8.48333	260.4	225.7	429.7	249.9	198.9	333.6	272.1	441.6		260.6	333.1	281.9	340.9	253.9	325.2	242.5	288.6
-8.46667	277.7	236.8	428.1	281.9	208.9	327.8	287.4	424.1		270.1	337.5	277.4	368.8	272.8	325.3	259	294.8
-8.45	264.5	230.8	423.8	249.7	217	344.4	280	446.8		266.5	333.7	280.9	344.2	256.7	304.5	271.8	295.7
-8.43333	255.4	229	418.4	266.9	229	343.8	277.4	432.9		266.8	336.3	276.3	361.2	265.4	299.6	250.6	310.7
-8.41667	258.3	232.6	424.5	261.8	224.4	347.2	287.6	469.6		263.3	331.9	282.6	346.9	257.6	314.8	246.6	296.8
-8.4	268.8	232.6	441.8	249.5	205.3	345.5	266	434.5		261	334.2	292.3	351.7	257.6	323.6	241.2	303.3
-8.38333	259.2	224.1	485.6	260.1	218.5	326.3	268.5	435.6		261.2	344.8	277.5	342.6	266.9	331.8	244.6	304.5
-8.36667	255.9	230	448.4	263.1	219.6	350.8	268.1	502.3		269.6	332.7	281.6	343.7	264.2	323.5	253.3	306.9
-8.35	271.3	236.7	442.8	261.1	212.2	335.4	268.8	497.8		249.5	345.3	279.1	364	255.9	316.9	250.7	297.4
-8.33333	276.2	232.6	455.2	265.6	203.8	331.3	277.4	433		257.4	331.4	278.7	353.3	273.8	326	246.3	307.7
-8.31667	281.3	225.5	437.4	268.4	198.3	355.9	277.3	439.2		260.2	340	286.8	365.9	261.6	322.6	261.2	299.6
-8.3	266.2	229.7	440.4	273.9	212	332.5	275.3	436.9		265.5	332.6	283.7	348.4	259.8	312.5	255.6	309.1
-8.28333	259.9	233.4	440.3	261.1	213.5	334.7	273.9	426.4		256.3	326.8	285.5	349.6	256.3	325.8	257.5	294.3
-8.26667	258	237.9	439.7	255.5	204.6	340.7	268.1	428.3		269.9	332.4	285.7	361	263.5	323.7	249.8	298
-8.25	260.5	233.4	455.2	261.7	217	348.7	265.7	418.2		271.8	332.1	280.1	368.2	255.1	327.9	235.6	301
-8.23333	263.3	225.5	468.5	256.4	225.1	339.1	274.2	424.4		255.7	334.9	271.3	344.3	262.6	315	239	298.7
-8.21667	257.3	224.6	464.4	251.7	213.2	342.9	273.4	406		262	335.7	270.3	361.1	256	303.1	250.4	310.4
-8.2	255.4	232.1	450	267.9	208.4	327.7	297.4	441.3		263.7	323.1	270.8	358.5	264.4	308.7	249	292.9
-8.18333	256.3	218.3	456.2	256	213	343.2	292.8	437.5		251.4	321.4	262.1	406.8	264.1	312.9	251.5	306.5
-8.16667	259.9	240.5	451.3	254.9	200.9	328.7	275.4	476.2		257.9	350	269.5	357.3	253.8	317.8	253.4	295
-8.15	257.3	226.3	436.3	271	202.4	335.5	270.6	502		265.9	327	262.5	355.6	260.1	316.7	233.1	300.6
-8.13333	268.9	225.8	444.8	255.1	201.1	343.5	270.4	522.7		257.2	344.8	269.9	348	269.5	300	239.3	306.6
-8.11667	270.9	223.6	440.7	265.2	211.9	332	260.8	450.1		269	332.7	275.2	363.9	265.4	314.5	257.5	302
-8.1	266	226.6	438	265.1	198.7	334.5	282.4	409.7		253.3	330.9	272.3	356.5	259.1	319.3	241.2	311.8
-8.08333	259.8	234.8	449.2	255.2	202.4	351.7	272.9	412.6		253.6	331.3	269.2	350.3	255.8	319.6	240	319.5
-8.06667	267.9	229.4	423.4	240.9	206.6	338.8	266.1	426		260.4	353.2	275.8	357.2	252.8	320.8	242.7	300
-8.05	263.5	236.7	440.2	247.9	204.8	356.8	281.6	454.5		253.2	335.9	279.8	359.3	255.5	321.1	258.8	306.3
-8.03333	266.5	243.6	442.2	265.5	209.7	346.2	273.6	437.8		266.6	332.4	281.1	356.6	249.8	312	241.5	299.1
-8.01667	258.4	235.7	460.4	257.9	199.3	338.3	270.1	441.5		270.1	333.6	286.7	358.5	262.9	308.6	251.3	311.8
-8	260.8	232.8	444.6	268.8	203.1	335	272.5	439		256.5	356.1	286.8	339.5	262.5	308.6	253.8	297.4
-7.98333	267.5	234.5	437.4	267.4	204	329	269.1	441.9		261.2	342.8	285.3	348.8	263.3	314.8	263	301
-7.96667	261.1	242.4	443.9	267.6	198.6	334.3	277.8	438.3		259.6	335.7	290.2	352	270.7	314.9	246.4	317.9
-7.95	258.3	231.8	473.3	264.3	201.7	330.7	271.6	428.3		259.5	333.5	281	351.2	257.9	346.7	252.9	296.3
-7.93333	265.2	236.2	459.3	262.3	206.8	334.8	270.5	418.8		267.9	335	276.1	343.1	257.5	329.6	239.8	312.6
-7.91667	256.2	229.3	450.4	252.6	200.1	343.5	271.5	450.8		255.9	328.9	273.8	318.2	255.1	312.7	250.6	305.6
-7.9	253.1	232.1	441.4	264.9	200.4	336.6	264.1	431.1		255.4	336.3	276.9	344.9	257	306.1	239.8	306
-7.88333	255.6	234.6	440.2	261.3	210.9	351	276.5	409.4		280.1	358.3	267.9	321.5	259.5	300.1	254.9	312.6
-7.86667	267.3	221.3	462.1	262.9	199.8	337.5	271.2	449.6		263.9	328.5	283.8	324.3	254.1	313	244.4	315.8
-7.85	255.4	229.5	450.9	261.1	198.2	345.4	287	437.8		260.4	328.1	281.4	357.2	274.2	319.2	250.5	304.4
-7.83333	264.3	227.8	453.4	269	204.9	353.2	276.1	414.7		263.8	337	279.8	335.3	256.1	322.2	249.2	294.5
-7.81667	275.8	232.8	444.1	251.1	204.8	351.1	280.2	476.2		255.6	332.5	283.1	334.7	257.7	316.4	250.8	306.2
-7.8	260.2	228.8	442.2	272.3	212.8	348.1	280.1	450.9		256.2	341.7	272.7	338.9	270	327.9	240.2	296
-7.78333	263.5	237.1	426	255.4	203.7	344.4	276	451		251.8	331.6	279.8	369.6	256.1	315.2	245.7	297.1
-7.76667	274.7	229.5	432.4	261.8	200.6	333.3	269.2	524.4		276.5	335.7	272	370.8	256.9	310.1	238	292.9
-7.75	275.9	227.3	448.9	256.3	212	348.4	267.6	448.4		263.9	321.1	282.3	327.8	257.5	314.8	256.4	295
-7.73333	272.6	231.6	464.1	258.4	202.7	345.8	272.3	404.5		225.1	330.1	280.5	348.1	253.8	337.3	244.4	299.2
-7.71667	258.4	241.5	437	252.9	202.2	333.7	266.7	447.7		233.5	335.5	284.2	371.5	238.8	320.5	255.7	313.1
-7.7	255.8	229.5	433.8	259.8	203.8	344.5	273.5	452.3		226.7	329	286.7	347.3	264.3	317.1	245.2	313.5
-7.68333	263.7	229.5	428.7	253.3	218	332.9	275.9	397.2		232.1	346.7	274.9	341.5	253.4	334.6	246	301.4
-7.66667	260.7	228.2	441.2	257.4	204.5	348.3	263.1	445.6		246.9	336.5	282.2	363.2	262.2	318	250.5	301.3
-7.65	267.8	226.6	470	260	211	353.5	292	462.2		233.6	342.3	287.7	368.5	266.7	335.5	278.6	312.2
-7.63333	262.6	227.1	445.7	269.3	197.7	357.5	289.7	436.1		241.9	340.9	297.9	351.1	265.9	316	257.5	308.7
-7.61667	267.9	224.7	419	270.6	202.5	363.8	262.7	430.7		241.4	344	288.7	338.8	268.9	318.5	248.4	297.8
-7.6	258.9	230.9	421.3	258.8	206.3	355.3	284.4	454.9		257.5	329.3	290	329.2	250.7	321	243.2	302.7
-7.58333	259.5	228.8	430.8	247.5	205.7	345.3	261.3	402.8		239.5	352.6	280.4	333.2	243	326.4	255.1	312.9
-7.56667	259	237.8	459.6	268.8	211	336.6	283	403.5		250.4	333.8	284.2	367.7	301.3	314.1	243	302.3
-7.55	261.3	222.2	450.5	267.8	213.9	331.1	272	431.6		243	342.1	275.8	352.6	255	325.7	259.6	304.6
-7.53333	271.9	229.2	466.3	267.2	206.3	348.6	278.3	423.6		246.3	342.7	272	350.9	267.3	300.3	241.1	312.8
-7.51667	249.7	222.5	442.7	271.4	205.9	343.5	270	461.9		238.5	334.3	270.9	359	261.9	325.6	237.4	300.2
-7.5	256.1	229.9	450.3	258	205.6	342.1	263.7	490.4		241.9	325.3	275.8	345.6	259.8	304	246.1	292
-7.48333	261.2	232.3	446.9	265.2	208.8	344.6	267	459.6		240.8	327.7	273.7	331	250.3	315.4	240.6	299.4
-7.46667	270.8	230.6	442.4	271.2	218.3	333.4	266.7	458.3		257.2	339.7	261.2	336.3	245.3	312.9	243.9	306.4
-7.45	246	233.4	458.3	259.4	204.8	345.8	270.3	466		251.5	342.8	272.3	328.1	267.3	320.7	254	295.8
-7.43333	258.9	230.3	467.6	270.1	193.3	343.8	280.1	448		251.3	341.4	266.4	329.5	262.5	320.3	250.2	294.8
-7.41667	257	222.3	445.6	262.4	207.2	350.5	268.3	433.7		246	335.1	268.2	308.4	258.2	319.3	257.9	301.8
-7.4	253.3	225.2	458.9	255.2	210.5	321.1	276.8	417.1		243.5	344.8	271.9	336.9	263.1	304.6	246.1	307.8
-7.38333	255.6	221.9	446.8	256.1	201.7	332.3	281.5	467.4		234.8	328.6	283.4	316.6	258.6	326.8	249.5	301.3
-7.36667	255.4	217.2	426.1	249.5	209.2	322.3	276.3	462.7		245.9	347.4	278.1	345.5	257.8	313.1	233.7	302.3
-7.35	251.9	225.2	452.7	269.4	200.2	329.8	269.2	459.8		253.6	372.7	279.3	346.6	257.2	321	249.7	301
-7.33333	259.8	233.1	454.8	272.4	207.1	332.9	260.6	430.7		236.6	334.5	278.7	331.7	277	312.2	255.2	319.1
-7.31667	262.6	222.7	452.3	250.1	200.7	335.7	269.1	475.3		231.8	339.1	278.3	354.6	256.4	329.4	240.3	306.7
-7.3	254.8	231.7	445.7	245	210.3	327	262.6	446.1		238	350.2	283.3	342.1	276.4	328.4	247.2	305.3
-7.28333	260	228.1	458.3	244.5	205.6	332.1	272.2	440		238.5	349.9	282	339.7	262.3	326.9	241.8	310.5
-7.26667	267.3	229.5	439.1	255.3	203.9	325.1	257.1	487.3		250.1	353.3	284	328.3	258.8	315	248.7	311.5
-7.25	251.5	224	445.2	258.6	202.6	327.8	263.6	433.3		248.2	340.3	276.5	343.2	262.9	320.9	256.4	305.4
-7.23333	251.6	222.4	433.6	255.6	206.7	338.7	283.7	437.8		251.2	366.7	290.4	343.9	257.7	317.9	256.5	298.9
-7.21667	266.5	224.9	448	249.2	199.8	339.6	266.8	430.7		249.4	350.2	274.8	365	261.1	320.2	242.2	299.9
-7.2	261.4	227.1	445.8	255	192.9	332.5	272	445.7		256.1	343.9	287.8	334.7	258.6	329.4	239.6	310
-7.18333	256.8	219.4	456.7	246.2	208.9	331.5	271.2	412.6		247.2	344.9	274.3	347	256.9	306.1	244.3	308.3
-7.16667	245	228	493.7	251.6	197.8	332.3	270.6	453.1		237.5	334.7	273.7	348.3	276.6	349.7	250.7	312
-7.15	245.6	238.8	428.2	261.3	204	345	275.3	405.6		242.3	341	269.8	326	270.6	309.8	248	309.3
-7.13333	251	229	439.2	248.9	207	349.4	271.1	420.9		246.7	350.9	282.6	338.9	257.8	312	255	313.2
-7.11667	261.1	226.3	450.2	259.2	200.7	339.8	273.6	446		267.2	335.7	266.5	317.5	267.5	325.1	256.3	307.9
-7.1	249.2	231.4	434.3	260.3	200.8	339.2	270.2	425.1		256.7	332.3	276.8	330.6	259.2	304.5	253.3	306.8
-7.08333	245.6	228.5	448.6	264.8	202.2	332	275.5	450.7		240.4	328.8	275.7	372.6	262	317	263.7	309.7
-7.06667	250.7	233.7	446.2	240.8	200.3	334.4	262.3	469.8		252.1	342.1	269.2	353.9	270.8	323.1	248.1	309.9
-7.05	257	229.5	462.5	247.4	201.3	323.2	265.5	442.7		242.1	336.3	286.9	348.6	271.8	325.3	250.8	308.1
-7.03333	261.5	233.1	448.6	260.1	203.9	323.2	266.6	420		243.1	337.1	282.4	355.8	277.1	317.5	253.8	302.1
-7.01667	262.9	230.3	444.8	256.7	213.7	325.7	267.6	490.2		270.1	335.4	281.2	331.3	265.1	329.6	257	309.5
-7	249.3	224.3	445.4	264	204.2	332.8	259.7	398.3		238	330.3	284.2	343.7	278	313.8	249.6	317.2
-6.98333	258.7	233.4	423.5	255.8	205.1	332.7	266.2	477.9		242.3	347.1	290	342.6	260.6	296.2	244	320.3
-6.96667	252.1	221.3	435.8	258	211.1	333.7	279.3	488.6		255.5	339.7	290.9	331.4	267.3	313.5	248.9	308.8
-6.95	253.9	233.3	436.6	255.2	212.6	340.5	266.7	439.7		249	343.3	285.6	343	274.3	327.3	265.8	304.6
-6.93333	265.2	230.2	443.2	246.7	201.7	350.2	272	420.4		245	329.1	290.2	341.4	271.5	322.7	252.5	306.8
-6.91667	256.6	229.4	470.6	259.6	197.8	331.6	270.7	455.7		244	333.1	286.2	357	277.3	309.8	247.6	306
-6.9	276	229.4	466.2	256	211.5	328	278	443		230.6	326.1	280	347.5	274.3	314.8	244	319.3
-6.88333	275.7	235	465	255.1	209.6	336.4	272.1	419.7		248	330.4	278.5	351.5	261.6	313.9	257.6	316.6
-6.86667	266.5	236.9	436.9	247.9	209.8	326	281.7	458.7		260.6	344.6	271.5	348	269	337.1	254.1	302.1
-6.85	281.5	235.5	435.3	266.8	211.5	341.5	274.6	456.3		243	349.8	285.1	349.2	276.7	326.9	247.4	303.5
-6.83333	276	230.1	455.7	254	206.2	333	277.9	429.7		234.5	348	264.1	357.8	263.8	307.9	254.4	307.3
-6.81667	269.1	226.8	430	252.7	209.6	313.9	266	421.3		246.5	333.3	276.2	361.8	275.8	323.6	259.3	311.9
-6.8	257.7	230.8	446.6	263.6	200.3	324.4	262.5	437.8		247.8	322.9	277.9	367.9	261.6	314.9	253.9	295
-6.78333	252.5	225.6	420.2	262.7	201.9	354.7	267.5	480.1		266.2	339.3	275.5	364.7	277.7	325.3	249.7	300.5
-6.76667	249.7	245.9	435.8	255.6	196.2	334.9	273.7	472.5		246.8	340	268.1	340.2	265.2	317	274.2	306.5
-6.75	248.5	231.2	434.4	270.1	205.5	318.7	269.7	451.3		246.7	362.5	266.3	331.5	271.4	317.5	254.1	307.8
-6.73333	262.8	225.7	474.6	243.5	202.9	322.9	262.5	422.1		257.5	338.6	270.9	349.1	273.4	305.5	261.4	315.3
-6.71667	268.3	230.3	448.9	247	206.2	333.5	253.7	451.9		244.2	349.9	274.8	354.5	268	335.5	260.1	306.4
-6.7	269.8	236.1	445.5	256.8	210.5	317.3	269.7	410.5		248.3	326.9	274.8	363.9	264.2	323.8	254.2	307.4
-6.68333	302.4	235.2	438.7	260.2	199.6	325.3	266.2	435.4		255.3	342.7	280.5	340.3	266	331	260.4	311.1
-6.66667	272.9	230.3	435.3	256.4	199.9	336.1	282.4	410.5		253.7	333.7	269.3	356.8	277.8	335.2	261.4	307.6
-6.65	257.5	225.8	442	252.2	196.3	315	255.9	404.7		262.2	330.1	280.5	346.5	276.4	308.3	255.5	314.1
-6.63333	237.4	231.3	427.5	251.9	196	324.4	261.9	411.4		250.6	351.5	283	327.8	276.4	314.1	243.2	308.2
-6.61667	251.3	237.3	424	254.8	201.4	318.5	267.6	457.4		236.5	349.3	279.9	333.7	270.6	327.8	255.5	319.5
-6.6	254.9	236.9	451.8	253.4	207.4	321.2	258.1	432.7		248.6	355.3	276	329.9	271	343.4	258.7	298.4
-6.58333	252.6	229.2	460.2	251.1	217.4	339.5	257.7	436.7		258.1	338.4	281.8	338.6	271.7	323.5	255.5	304.6
-6.56667	252.1	232.3	436.2	249.7	210.6	325.8	272.1	458.3		270	339.9	284.8	348.5	286.8	311.7	263.4	312.1
-6.55	246	227	442.6	264.9	206.1	324.1	265.3	436.8		260.1	363.2	268.8	336.1	269.8	337	257.4	289.5
-6.53333	255.3	223.5	445.4	246.2	201.6	340.4	266	468.1		257	341.9	283.2	345.7	265.7	327.9	249.3	315.7
-6.51667	255.1	227.1	448.2	245	201.6	337	269.3	483.3		246	327.9	283	401	295.2	338.1	258.5	315
-6.5	261.2	232.1	444.8	246.4	209	344.8	265.9	451		244.8	327.7	277.3	348.1	271.9	314.7	261.8	297.2
-6.48333	252.4	221.2	439.7	256.7	204.6	348.5	262.4	446.2		241.6	325.4	281.7	323.1	267.2	337	258.2	302.2
-6.46667	274	231.4	441.7	252.2	212	331.2	270.3	418.5		252.5	339.3	282.4	331.5	276.7	321.9	258.1	318.7
-6.45	250.5	227.1	475.9	238.5	202.5	331.9	269	490.2		238.8	337.1	272.1	372.4	270	306.6	258.5	308.4
-6.43333	249.7	234.4	452.6	255	212.8	358.4	272.8	445.8		263.1	335.8	272	346.2	271.6	320.3	259	305.9
-6.41667	250.8	230.9	443.1	254.2	200.4	336.1	262.4	469		254.1	336.8	269.6	362.6	262.4	316.3	248.5	308.7
-6.4	252.4	224.8	433.6	254.8	198.8	340.9	260.1	408.1		265.3	337	258.6	367.8	260.5	316.5	249.1	325.8
-6.38333	270.3	222.1	424	264.6	202.8	342	272.9	431.6		258.2	341.3	269.4	344.6	276.2	309.6	249.1	304.8
-6.36667	264.2	229.9	438.4	249.1	209.8	327.7	268.2	445.3		249.6	333.1	269.5	368.5	258.2	319.2	259.7	318.4
-6.35	261.6	234.2	431.1	267.3	201.1	337.3	272.2	437.1		243.3	359.1	268.9	352.2	265.9	297.4	252.1	302.1
-6.33333	243.8	235.4	426	262.1	204.8	328.6	252.9	454.1		242.1	341.2	271.4	366.2	266.1	337.1	258.4	307.7
-6.31667	252.3	231	429.5	253.2	200.4	340.1	261.1	435.8		240.6	364.3	274.2	336.7	259.6	313.6	248.3	314.6
-6.3	251.4	238.5	435.9	254.1	201.4	342.5	273.7	437.1		248.7	334.2	274.7	369	266.1	315.9	248.7	314.4
-6.28333	258.2	234.7	462.1	255.8	205.6	333.9	264.2	430.9		239.8	347.3	284.4	352.9	262.4	322.3	257.3	317.4
-6.26667	256.2	228.2	443.9	255.6	209.4	317.7	258.9	463		255.3	352	275.5	366.9	270.2	321.8	267.1	298
-6.25	262.4	236.4	460.7	261.5	203.1	313.5	251.4	422.3		241.8	339.7	267.9	338.9	273.8	315.1	264	300.5
-6.23333	254.6	236.9	448.4	250	204.9	331.9	256.4	448.6		239.5	332.5	281.3	343.2	258.5	337.4	253.4	300
-6.21667	246.2	237.6	448	256.9	206.1	344.6	260.2	460.6		255.4	331.4	282	345.9	261.2	325.7	266	319.9
-6.2	243.1	229.8	439	253.1	204.6	341	268.4	464.5		242.6	354.9	285.2	340.2	263.5	310.9	270.6	324.2
-6.18333	247.5	229.2	466.2	251.8	201.9	366.7	256.7	437.8		248.4	360	271	349.3	255	310.6	260.3	297.2
-6.16667	244.9	228.1	437.9	250.4	196.1	315.7	268.9	425.7		261.8	335.2	273.9	330.9	254.1	302.2	256.3	332.6
-6.15	244.4	226.1	431.8	262.7	197.7	346.2	273.2	420.7		252.3	340.9	284.9	336.3	266.1	313	254.1	302.9
-6.13333	247.4	228.4	432.5	250.8	200.2	320.9	268	407.6		250.6	366.1	269	330.3	270.6	314.4	259.1	317.5
-6.11667	242.9	223.2	419.5	238.1	206.3	338.9	263.5	443.5		245.4	331.2	270.7	365	266.2	328	258.5	308.4
-6.1	255.7	236.9	431.1	261.2	227.5	319.4	265.5	459.9		252.5	327.9	271.8	331.9	257.6	335.6	258.1	301.9
-6.08333	234.4	235.3	439.1	252.2	204.8	327.1	267.9	414.2		241.2	330	267.6	327.5	260	320.6	257.2	300
-6.06667	252.5	229.4	458.1	263.7	203.2	330.6	281.8	430		245.6	338.6	265.1	345.5	260.1	322.1	262.4	311.7
-6.05	247.6	227.1	453.8	264.3	206.9	322.5	282.4	409		258.3	338.8	262.6	370.7	272.5	322.1	248	298
-6.03333	249.5	229.5	470.9	273	208.2	323.6	277.6	465.4		259.7	353.4	276.2	333.9	268.4	323.2	241.5	312.6
-6.01667	262.2	225.7	441.7	262.9	207.9	324.8	259.3	466		258.1	328.5	269.2	344.1	263.5	307.7	260.4	308.7
-6	261.3	230.3	428.1	261.3	199.4	325.9	265.8	465.5		265.4	334.2	256.8	353.1	275.9	310.3	259.1	309.2
-5.98333	255.2	233.9	430.2	258.5	205.6	330.8	244.1	463.3		254.2	331	269.7	342.4	267.4	310.5	257.1	295.7
-5.96667	256.5	231.7	427.2	252.7	201.3	333.1	279.4	465.9		253.3	349.5	276.3	334.1	257.7	321.4	264.5	302.7
-5.95	249.6	232.6	420.2	256.4	202.9	325	260.1	475.9		265.4	355.3	267.7	327.6	267.9	337.4	257.7	322.6
-5.93333	233.1	229.8	443.9	251.3	211.4	318.9	275	441.9		255.9	339.8	276.3	344.6	249.6	324	257.8	309.4
-5.91667	247	232.3	453.7	252	211.4	334.6	277.8	490.2		245.9	347.2	286.3	341.8	258.9	321.3	249.2	303.2
-5.9	247.1	234.1	471.5	262.2	210.7	349.5	280.6	463.6		248.2	340.5	283.6	350	260.9	327.5	267.2	315.1
-5.88333	252	237.6	456.5	255.2	209.6	313.4	263.1	473		255.7	339	276.2	383.9	254.4	336.6	250.8	311
-5.86667	251.4	239.8	442.8	249.9	208.3	317.8	279.3	435.2		247.7	346.5	284.3	358.7	280.9	332.5	249.8	303.4
-5.85	255.5	227.1	446.2	259.6	216.9	310.3	288.4	416.6		246.6	346.1	281.4	352.3	268.2	331.2	263.5	309.5
-5.83333	249.2	228.2	451.7	259.9	207.3	323.1	270.7	437.5		241.7	349.2	282	343.3	261.7	325.9	244.9	311.3
-5.81667	249.8	225.7	433.7	263	208.3	320.1	271	413.2		251.8	349.8	273.5	324.1	268	330	260.4	300.2
-5.8	243.3	229.3	452.2	246.6	206.1	318.6	264.9	425.3		263.8	337.6	273.8	335.4	258.9	314.7	260.8	312.6
-5.78333	241.8	227.5	434.8	250.4	204.5	345.1	259.3	443		261.9	347.8	276.8	320.6	256.1	320.7	254.9	306
-5.76667	244.4	234.2	449.5	258.8	212.5	320	253.5	431.8		258	349.7	284.1	360.4	263.7	311.2	254.7	312.5
-5.75	255	236.2	440	261.9	205.9	314.6	263.2	403.5		253.6	362.2	268.6	348.9	252.4	314.6	255.1	307.8
-5.73333	247.1	238	444.2	261.2	212.9	317.6	269.3	404.9		249.5	354.1	284.8	323.8	259	325.5	252.8	323.9
-5.71667	249	236.9	438.4	255.8	210.6	322.5	271.2	406.3		241.9	335.5	268.6	347.3	249.2	312.7	254.3	320.1
-5.7	248	240.2	453.5	249.2	204.3	307.4	263.4	401.9		251.9	342.7	279.7	350	261.3	316.9	252.6	302.7
-5.68333	244.5	236.2	473.9	239.4	203.9	298.1	247.9	469.4		247.3	335.5	276.1	370.5	261.5	316.6	257.1	299.3
-5.66667	248.4	229.8	468.9	261.8	199.4	309.9	262.7	437.1		256.6	345.3	264.8	354.8	260.5	327.1	255.4	309
-5.65	248.2	224.4	455	250.8	196.4	298.5	279.2	403.4		241.9	338.4	273.2	342.9	259.3	336.7	261.6	299.9
-5.63333	243.4	238.2	442.2	260	195.9	299.4	265.9	407.5		246.2	334.2	269.6	361.6	257.5	328.5	268	316.3
-5.61667	237.9	235.9	438.4	249.2	205.1	313.4	264.7	442		250.6	335	266.9	356.2	252.1	327.9	263	324.4
-5.6	251.4	237.2	450.3	247.6	212.5	277.9	265.6	427.2		253.4	344.8	274.1	336.5	260.2	335.4	261.5	299.5
-5.58333	241.2	237.6	463.9	255.1	214.7	300.9	253.6	477.6		251.1	336.8	270.2	346.6	250.2	348.7	281.2	301.9
-5.56667	249	242.7	465.1	244.4	206.8	313.3	261.3	439.7		243.1	354.2	287.6	350.3	238.6	326.2	257.3	299.5
-5.55	241.5	248	442.9	246.8	209.6	321.9	255	452.3		241.8	338.1	275.3	335.7	254.9	328	259.1	306
-5.53333	261.8	229	454	250	212.5	327.1	261.8	434.5		249.3	332.3	270.6	324.9	251.9	315.5	251.9	303.8
-5.51667	247	237	452.5	253.2	209.2	330.6	268	436.1		244.8	342.9	269.7	327.9	255.8	322.4	263	297.3
-5.5	238.8	232.8	421.3	258.6	206.1	314.3	252.6	421.6		234.5	343.4	274.6	331.8	254	319.8	261.9	309.2
-5.48333	242.7	242.6	432.5	261.4	208.6	326.1	259.6	439.5		247	346.6	270.9	342.2	259.1	309.8	256.8	318
-5.46667	241	236.3	459.4	265	208.8	339.2	274.5	438.1		245.5	347.7	276.4	329.5	267.4	325.1	264.9	305.6
-5.45	247.6	233.3	468.4	262.9	205.8	332.6	268.6	436.1		252.1	354.1	273.4	329.1	254.4	323.4	262.8	311.6
-5.43333	250.3	248.4	455.9	257	218.6	347.7	260.3	445.8		250.9	344.9	275.6	343.6	253.2	323	261.4	297.5
-5.41667	245.9	232.5	441.4	260.6	216.2	345.1	263.2	462.4		248.2	340.6	257.7	321.6	259.2	324.4	252.5	300.1
-5.4	249.4	237.2	419.8	249.2	210.9	331.8	261.7	432.1		252.4	343.1	281.3	350.3	267.3	337.3	260.2	316.1
-5.38333	276.3	228.5	442.9	245.9	206	332	266.4	422.3		245.4	354.7	275.1	333.9	253.6	339.2	258	306.7
-5.36667	256.7	239.8	446.6	255.9	201.3	330.9	257.3	427.1		269.8	338.7	282.3	315.4	255.3	337.2	246.4	300.3
-5.35	243.7	236.3	439.6	262.6	202.3	351.4	265.7	483.7		251	336.2	278.7	350.4	249.8	314.9	252	332.7
-5.33333	261.2	230.4	447.2	241.3	211	354	273.2	439.2		265.9	348	260.3	342.9	258.7	358.1	243	306.8
-5.31667	249.4	240.9	431.4	259.9	216.3	340.6	275.2	413.4		261.3	322.8	263.9	347.6	261.5	320.6	261.6	305
-5.3	254	228.7	441.7	255.5	206.1	340.9	284.9	476.2		254.9	349.6	270.2	362.9	264.8	317.5	261.4	299.3
-5.28333	243.2	226.8	445.8	255.2	212.7	333	259.5	480.7		252	357.9	270.3	354	262.9	318.3	261	301.2
-5.26667	251	226.8	424.9	250.6	214.9	352.7	264	450.6		253.7	352.1	268.4	327.2	257.1	344.2	256.3	310.9
-5.25	242.2	224.8	430.7	254.9	203.9	371	267.2	428.2		252.1	349.8	261.6	342.8	258.4	327.5	256.9	314.4
-5.23333	249.4	233.8	437.7	257.4	208.7	349.1	255.7	440		253.4	331.9	261.5	339.5	256.9	319.7	271.9	309.2
-5.21667	237.9	228.3	454.7	251.9	211.1	353.1	258	445.3		242.2	348.7	268.6	359.3	261.9	333.8	262.2	297.5
-5.2	249.9	226.8	482.3	268.2	208.4	347.3	263.9	426.6		262.6	347.3	272.6	339.9	258.6	354.1	256.9	309.6
-5.18333	258.1	227.9	466.9	256.5	200.3	341.6	265	443.1		252.3	333.3	282.4	345.5	258.5	326.9	258.2	305.1
-5.16667	241.4	232.8	472.1	247.7	203.3	345.5	262.5	447.4		228.8	383.3	270.9	323.8	268.4	323.3	261.1	310.9
-5.15	243.3	228.2	438.8	259.8	209.4	336.7	265	461.7		240.2	365.7	273.6	339.5	258.9	318.4	260	314
-5.13333	247.2	233.2	451.2	258.7	206.1	330.8	262.7	400.2		227.1	346	264.8	334.7	269	315.7	259.2	308.6
-5.11667	248.1	228.9	442.4	276.4	207.6	331.1	261.7	409.2		228.6	335.9	279.2	347.2	252.4	328.7	250.8	303.2
-5.1	242.8	227.7	451.5	270.2	213.4	355.2	258.6	417.8		226.4	345.7	272.8	330.9	253.6	307.2	242.6	307.5
-5.08333	245.1	232.9	439.6	257.6	204	335.6	258.1	432.6		236.1	356.1	273.5	352.4	252.3	302.2	249.5	302.1
-5.06667	242	227.7	424	261.5	207.3	347.4	256.3	422.6		229.4	352.4	281	334.6	264.5	329.2	257.1	297.9
-5.05	245.2	235.4	440.4	248.3	208	337.1	261.8	452.4		225.2	327.3	268.3	334.5	256.3	329.3	256.6	306
-5.03333	252.4	233.2	455.9	250.1	202.9	347.6	255.7	474.7		218.1	357	271.5	343	267.2	340.9	260.9	310.9
-5.01667	245.5	232.7	471.4	249.4	204.2	351.5	245.4	468		242.5	339.5	281.4	360.1	256.5	316.7	256.2	300.9
-5
-4.98333
-4.96667
-4.95
-4.93333
-4.91667
-4.9
-4.88333
-4.86667
-4.85
-4.83333
-4.81667
-4.8
-4.78333
-4.76667
-4.75
-4.73333
-4.71667
-4.7
-4.68333
-4.66667
-4.65
-4.63333
-4.61667
-4.6
-4.58333
-4.56667
-4.55
-4.53333
-4.51667
-4.5
-4.48333
-4.46667
-4.45
-4.43333
-4.41667
-4.4
-4.38333
-4.36667
-4.35
-4.33333
-4.31667
-4.3
-4.28333
-4.26667
-4.25
-4.23333
-4.21667
-4.2
-4.18333
-4.16667
-4.15
-4.13333
-4.11667
-4.1
-4.08333
-4.06667
-4.05
-4.03333
-4.01667
-4
-3.98333
-3.96667
-3.95
-3.93333
-3.91667
-3.9
-3.88333
-3.86667
-3.85
-3.83333
-3.81667
-3.8
-3.78333
-3.76667
-3.75
-3.73333
-3.71667
-3.7
-3.68333
-3.66667
-3.65
-3.63333
-3.61667
-3.6
-3.58333
-3.56667
-3.55
-3.53333
-3.51667
-3.5
-3.48333
-3.46667
-3.45
-3.43333
-3.41667
-3.4
-3.38333
-3.36667
-3.35
-3.33333
-3.31667
-3.3
-3.28333
-3.26667
-3.25
-3.23333
-3.21667
-3.2
-3.18333
-3.16667
-3.15
-3.13333
-3.11667
-3.1
-3.08333
-3.06667
-3.05
-3.03333
-3.01667
-3
-2.98333
-2.96667
-2.95
-2.93333
-2.91667
-2.9
-2.88333
-2.86667
-2.85
-2.83333
-2.81667
-2.8
-2.78333
-2.76667
-2.75
-2.73333
-2.71667
-2.7
-2.68333
-2.66667
-2.65
-2.63333
-2.61667
-2.6
-2.58333
-2.56667
-2.55
-2.53333
-2.51667
-2.5
-2.48333
-2.46667
-2.45
-2.43333
-2.41667
-2.4
-2.38333
-2.36667
-2.35
-2.33333
-2.31667
-2.3
-2.28333
-2.26667
-2.25
-2.23333
-2.21667
-2.2
-2.18333
-2.16667
-2.15
-2.13333
-2.11667
-2.1
-2.08333
-2.06667
-2.05
-2.03333
-2.01667
-2
-1.98333
-1.96667
-1.95
-1.93333
-1.91667
-1.9
-1.88333
-1.86667
-1.85
-1.83333
-1.81667
-1.8
-1.78333
-1.76667
-1.75
-1.73333
-1.71667
-1.7
-1.68333
-1.66667
-1.65
-1.63333
-1.61667
-1.6
-1.58333
-1.56667
-1.55
-1.53333
-1.51667
-1.5
-1.48333
-1.46667
-1.45
-1.43333
-1.41667
-1.4
-1.38333
-1.36667
-1.35
-1.33333
-1.31667
-1.3
-1.28333
-1.26667
-1.25
-1.23333
-1.21667
-1.2
-1.18333
-1.16667
-1.15
-1.13333
-1.11667
-1.1
-1.08333
-1.06667
-1.05
-1.03333
-1.01667
-1
-0.983333
-0.966667
-0.95
-0.933333
-0.916667
-0.9
-0.883333
-0.866667
-0.85
-0.833333
-0.816667
-0.8
-0.783333
-0.766667
-0.75
-0.733333
-0.716667
-0.7
-0.683333
-0.666667
-0.65
-0.633333
-0.616667
-0.6
-0.583333
-0.566667
-0.55
-0.533333
-0.516667
-0.5
-0.483333
-0.466667
-0.45
-0.433333
-0.416667
-0.4
-0.383333
-0.366667
-0.35
-0.333333
-0.316667
-0.3
-0.283333
-0.266667
-0.25
-0.233333
-0.216667
-0.2
-0.183333
-0.166667
-0.15
-0.133333
-0.116667
-0.1
-0.0833333
-0.0666667
-0.05
-0.0333333
-0.0166667
0	170.2	217.4	282.1	210.9	214.3	141.3	246.6	342.7		208.3	214	231.7	141.9	198.3	249	114.4	123.1
0.0166667	172.1	218.2	257.4	212.7	217.4	168.6	242.3	351.3		217.8	195.2	224.4	226.7	185.8	260.1	113.4	132.7
0.0333333	169.1	215.5	241.8	213.3	212.3	161.3	241.8	335.9		220.2	193.2	226	156.8	182.9	237.1	116.4	123.1
0.05	176.4	219	229.2	195.7	216.8	137.7	241.8	355.9		221	217.4	214.8	141.3	184.4	239	117.6	125.6
0.0666667	181.5	214.8	229.7	222.4	217.3	127.5	254.2	345.5		212.2	195.5	215.1	155	182	238.6	121.5	127.2
0.0833333	175.1	222.6	253.8	219.3	210.1	123.8	229.5	346.5		212	197.7	203.5	128.9	188.9	240.1	121.1	129.1
0.1	167.6	225.2	270.9	225.9	215.3	111.1	235.1	344.8		214.5	207.1	210.9	129.7	179.4	249.6	135.9	135.9
0.116667	178.8	227.7	267.6	225.1	209	108.9	222.5	351		212	190.6	207.1	136.1	187.7	241.7	115.9	129.6
0.133333	178.6	234.7	236.2	221.3	217.8	108.6	225	355.1		207.4	209.2	219.8	134.6	182.2	240.3	112.3	130.3
0.15	171.2	223.8	230.5	217.8	208.3	110.2	224.1	336.4		209.4	211.3	230.3	131.6	177.3	244.7	122.2	127.6
0.166667	173.6	218.4	249.3	245.2	207	125.3	226.7	341.3		208.9	215.9	227.2	134.4	184.6	269.7	130.4	124.1
0.183333	186.5	216.5	227.7	208.7	210.5	136.9	214.7	338.9		204.5	220.1	231.8	142.8	187.5	281.5	121.8	120.3
0.2	188.5	225.9	230.8	213.6	205.3	156.5	221	339.3		200.5	237.3	216.9	137.8	181.2	246	122.6	114.9
0.216667	182.5	223.6	227.6	221.4	214.9	166.6	212.7	338.9		212.4	222.4	212.5	114.8	187.9	259.4	122.5	118.4
0.233333	177.2	216.8	225.7	225.8	211.7	165.6	202.2	368.1		219.4	211.5	205.8	118.9	183.3	244.6	119.2	123.4
0.25	176.2	213.8	217.8	219.3	205.7	175.1	214	330.9		207.1	229.6	210.4	131	184.1	246.8	117.8	125.7
0.266667	173.1	216.1	220.9	216.3	212.8	174.4	208.2	328.6		201.6	226.2	220.5	137	177.1	227.2	116.2	115.2
0.283333	176.9	219	257	238.7	207	183.8	221.5	346.3		187	220.7	215.5	132.2	175.1	244	116.4	117.5
0.3	173.7	214.4	227.5	226.4	204.1	181.4	203.6	336.7		190.9	228.7	207.3	123.4	193	236.1	120.4	116.4
0.316667	155.9	216.4	219.9	224.7	213.3	160.7	214.4	325		185.5	204.1	213.8	114.9	183.7	252.9	116.7	133.3
0.333333	166.7	219.8	216.1	226.5	209.2	128.3	214.2	326.5		183.6	200.1	206.7	119.8	180.9	261.2	118.7	125.7
0.35	161.2	223.1	236.7	235	219.1	120.7	209.1	318.9		180.3	229.9	206	116.9	179.2	239.2	114.3	115.2
0.366667	166.4	228.6	242.2	244.7	198.3	114.7	206.2	328.5		180.2	202.9	215.6	113.7	183.6	245.5	119.2	117.5
0.383333	168.9	221.4	245.8	234.9	209.8	114.2	232.5	313		193.7	210.4	223	116.2	181	229.7	118	116.4
0.4	179.4	215	235.4	235.1	208.1	102.4	204	318		173.8	217.6	234.6	121.5	185.2	218.8	120.6	133.3
0.416667	166.8	221.5	225.8	225.7	207	114.5	199.4	323.5		184	215.3	212.8	114.7	185.3	225.7	114.9	147.9
0.433333	168.3	218.4	279	229.8	212.3	106.5	193	333.2		186.9	229.4	221.5	114.1	178.8	220	118.8	133.9
0.45	168	220.8	313.3	238.8	210.1	108.2	199.2	349		178	214.5	209.3	122.7	189	232.5	121.2	137.2
0.466667	172.4	218	331.3	229.7	207.3	98.8	204.7	334.3		176.3	198.6	206.6	116.3	183.7	214	117.5	128.6
0.483333	168.7	219.2	275.4	247.2	214	102.6	199.1	344.6		173.1	203.4	196.1	134.1	181	222.9	114.5	119.9
0.5	160.2	227.1	276	229.7	212	104.1	196.7	342.8		177.7	192.5	193.2	117.6	178.4	237.6	115.9	147.9
0.516667	171	224	256.5	242.4	200.1	133.3	184.7	326		182.1	191.4	220	113.9	174.9	229.4	111.5	133.9
0.533333	181.2	219.4	269.4	227	208.3	151.7	202.4	317.7		175.8	193.7	228.3	108.6	182.5	230.3	109.4	137.2
0.55	171.2	221.7	239	225.7	200.2	154.4	207.8	325.6		184	190.8	214.4	130.5	173.6	226.5	110.7	128.6
0.566667	169	226.7	244.2	220.3	210.7	161.7	190	328.5		172.8	197.4	209.8	121.2	178.6	238.6	107.7	139.7
0.583333	171.6	223.9	242.2	220.2	209.8	167.2	187.4	323.6		172.7	183.2	214.7	110.5	180	237.5	107.7	135.4
0.6	180.3	218.2	244.6	227.9	207.6	168.5	177.9	333.1		172.6	170.1	204	138.5	182.1	218.6	108.7	131.5
0.616667	180.5	229.7	259.8	224.7	201.5	176.9	187.8	327.2		173.7	171.1	194.3	169.1	181	231	104.6	130.8
0.633333	174.6	217.7	270.1	213.2	204.9	168.4	179.6	326.5		169.9	166.2	194.1	196.9	174.8	227	102.1	114.9
0.65	165.6	222.8	255.8	233.1	204.5	164.5	182.5	321.8		169.2	160.6	179.3	211	178.4	224.8	103.8	139.7
0.666667	177.6	222.9	245	215.1	201.1	182.9	179.1	327.4		165	167.8	199.9	215.6	187.5	245.1	101.4	135.4
0.683333	172.7	218.7	266.7	225.3	206.9	170.1	174.3	310.8		172	168.6	217.5	192.2	178.2	225.7	104	131.5
0.7	180.8	223.4	274.3	226.7	202.5	137.3	176	323.3		159.6	168.8	226.1	173.3	177	216.3	104.6	130.8
0.716667	164.4	222.2	293.1	207.8	206	120.4	180.4	317.9		156.6	181.9	215.3	169.5	177.3	224.6	110	114.9
0.733333	167.5	221.4	258.6	209.1	203.8	118.8	164.7	323.7		155.1	186.6	222.9	155.3	171.3	223.9	108.1	127.5
0.75	163.2	222.7	258.4	211.7	202.7	118.6	169.6	327.9		162.3	190.8	203.7	149.1	176.5	223.1	117.7	117.9
0.766667	163.7	233.8	239.5	226.2	200	111.6	168.3	321.9		153.7	192.3	191.3	142.9	164.2	226.9	112.2	120.9
0.783333	173.7	223.3	255.9	214.4	203	111.6	159.9	340.4		156.2	183.4	195.7	141	179.7	222.1	106.1	122.5
0.8	170.8	223.9	247	223.4	205.5	109.6	172.6	328.6		164	188.4	180.7	141.4	171.6	203.6	108.4	115
0.816667	172.3	216.7	300.6	203.4	209	109.4	171.7	327.5		163.1	189.8	177.8	169.7	162.7	219.5	110.4	127.5
0.833333	177.9	224.2	291.7	211.3	217.2	133	160.3	322.6		159	172.9	176.1	146.9	177.3	229.4	102.4	117.9
0.85	164.5	224.3	299.7	217.7	209	138.6	184.4	331.6		162.5	192.2	183.5	128.2	167	212.2	111.2	120.9
0.866667	169.1	226.8	312.9	211.6	212.1	169	185.4	336.4		156.5	176.7	202.4	130.7	172.8	235.3	109.7	122.5
0.883333	164.4	223	287.4	198.5	202.3	176	173.8	330.7		161.8	184.2	188.7	129.4	173.2	234.3	110.1	115
0.9	162.3	224.9	265.8	187.2	205.9	171.5	192.2	322		158	170.1	193.6	124.4	178	220.4	114.6	124.6
0.916667	168.3	217.9	279.4	206	199.7	177.2	175.4	313.1		160.2	179.2	180.2	128.9	177.3	221.9	112.2	134.4
0.933333	163.1	217.7	269.2	190.4	199.5	178.3	183.4	329.7		165.9	178.4	176.4	125.2	175.3	233.3	111.4	134.4
0.95	169.7	224.1	286.3	203.9	202.7	154.1	172.1	326.1		165	171.2	172.1	118.5	167.3	227.1	113.3	132.6
0.966667	170.3	217.8	307.5	227.5	209.2	157.8	178.5	334		169.5	177.4	167.8	124.6	172.6	242.8	109.9	139.7
0.983333	167.2	219.4	319.9	207.1	207.7	175.6	163.6	321		172.4	169.8	171.8	123.7	166.3	238.5	115.4	124.8
1	168.7	221	279	201.8	202.5	163.3	164.2	330.6		164.2	174.5	166.7	130.7	171.3	229.7	110.2	132.7
1.01667	161.8	213.9	276.7	192.1	199.7	164.4	155.4	330.4		168.1	173.4	177.8	126	166.1	228.5	104.8	127.6
1.03333	203.4	218	265	193.8	206.9	159.3	155.8	315.9		166.5	185.8	185.2	134.5	174.3	236.5	105.3	133.4
1.05	168.4	218.4	266.4	194.3	202.4	159.9	159.6	323.5		166.6	172.2	198.5	116.5	167	240.6	107.3	125.3
1.06667	165.4	219.5	296.4	202.4	197.9	159	163.4	320.5		162	176.4	189.4	120.7	166.2	234.3	111.8	124.6
1.08333	164.4	212.1	290.8	193.7	208.2	163.5	154.3	318		165.7	187	185.5	117.6	176.7	261.7	112.2	134.4
1.1	166.5	216.8	274.9	193.2	206.7	164.8	212	337.2		154.3	175.7	173.9	128.7	186.6	248.5	112.6	134.4
1.11667	175.6	218.1	277	185.8	204.9	160.6	152.1	349.5		156.2	189.5	179.3	120.3	176	223.5	108.7	132.6
1.13333	176.8	223	312.9	180.9	210.6	157.2	164.9	329.6		153.5	188.5	176.9	121.8	161.3	229.5	119.2	139.7
1.15	164.3	221.2	282.3	193.8	210.6	163.8	176.1	316.3		153.9	194.7	180	123.6	163	231.3	116.1	124.8
1.16667	168.4	216.3	283.7	186.5	214.1	158	209.3	306.1		162.5	196.1	168.8	120.4	165.3	237.2	113.2	132.7
1.18333	174.3	220.3	285.7	198.2	200.3	131.1	168.3	321.2		164.9	199.9	164.7	116.3	166.4	240.7	108.6	127.6
1.2	173.3	227.3	266.1	177.2	206.4	121.3	155.8	329.1		161.7	198.9	169.1	122.1	165.2	226.6	106	133.4
1.21667	185.2	224.5	255	189.5	205.6	109.6	179.7	325.8		162.9	181.5	183.1	114.5	162.8	235.1	108.9	125.3
1.23333	198.2	225.5	246.5	213	205.8	109.6	158.6	335.4		153.6	190.5	190.7	120.4	161.3	240.4	111.3	124.6
1.25	182.7	218.3	256.4	223.8	203.2	103.7	156.1	332.9		155.7	186.9	189	119.5	163.2	238.2	118.2	134.4
1.26667	179.5	231.7	235.4	220.7	199.3	106.1	148.9	317.9		160.2	198.2	188	122	166.9	235.2	109.8	134.4
1.28333	170.1	217.6	236.6	199.1	203.2	105.8	184.5	317.9		156.7	197.9	178.4	120.2	169.5	231.7	104.8	132.6
1.3	169.9	217.8	249.8	195.2	211.6	97.1	186.1	305.6		161	195.2	167.5	118.4	164.4	248.7	108.6	139.7
1.31667	159.3	217	270.4	193.4	210.3	92.1	159.8	320.1		160.3	197.9	164.2	114.9	161.9	250.5	110.4	124.8
1.33333	170.2	218.1	295.6	200.6	197.5	111.1	162.2	324.4		163.1	185.4	157.2	118.9	168.2	258.4	119	132.7
1.35	165.9	225.9	285.1	199.6	204	125	161.8	324.6		168.1	181.9	160	117.9	160.9	231.7	114.1	127.6
1.36667	174.7	221.7	282.7	200.4	203.7	151.9	160.6	334.6		165.7	186	181.2	115.8	155.1	264.4	122.5	133.4
1.38333	177.4	216.3	314.5	193.1	200.8	162	176.1	339.1		153.6	181.9	197.2	116	163.6	233.9	109.3	125.3
1.4	167.5	219.9	291.4	185.2	193.6	179.2	193.9	321.1		157.4	182.4	176.6	115.7	150.9	249.3	111	139.1
1.41667	172.6	224.6	276.2	187.7	195.2	179.4	188.5	336		153.7	176.9	178.9	123.3	159.4	230.2	103.1	131.2
1.43333	167	227.3	282.3	197.1	187.1	168.5	221.1	335.5		150.5	169.8	176.4	123.8	167.6	248.5	100.2	129.8
1.45	184.9	227.3	266	201	190	158.1	198	322.1		152.1	168.2	165	112.1	155.9	233.1	100.1	133.4
1.46667	210.1	219.3	291.9	188.9	196.8	145.8	193.4	332.1		157.1	170.1	175.7	118	165.2	235	108.3	129.6
1.48333	182	225.2	323.7	189.9	199.1	133	185.5	338.2		157.5	195.2	180.9	114.5	156.9	223.1	105.6	131.7
1.5	182.2	218.5	339.5	187.2	188.9	130.8	221	321.7		153.5	189.3	171.3	111.6	160.6	226.4	112.2	122
1.51667	188.1	221.2	280.2	221.5	183.8	101.8	188.9	295.9		157.2	194.2	166.5	122.1	158.7	247.7	108	137.3
1.53333	185.4	215.2	295.3	227.6	184.2	104.3	169.7	315.7		148.2	191	164.9	121	150.8	236.2	108.9	124
1.55	183.4	219	284.2	223.9	183.5	105.7	185.2	322		152.1	209.9	184.4	110.8	157	240.7	110.9	132
1.56667	184.5	223.5	283.7	212.5	180.3	100.2	173.7	329.1		148	209.8	167.3	110	157.9	241	102.6	139.1
1.58333	187.3	221.1	302.3	193.9	181.5	104.5	189.3	327.7		152.1	222.6	168.2	111	164.2	241.4	103.2	131.2
1.6	190.8	225.6	278.8	175.5	185.7	101.8	173.8	315.9		150.9	209.9	169.3	112.5	149.8	226.6	102.3	129.8
1.61667	191.4	221.5	303.7	195.2	188.4	109	211.2	313.2		144.9	205.2	177.9	113.7	148.2	221.1	101.9	133.4
1.63333	198.2	219.7	328.8	200.2	191.7	126.7	186.5	302.7		152.6	193.4	167.4	109.2	148.2	236.7	99.5	129.6
1.65	191.3	225.2	284.5	191.3	190.2	136.4	189.7	311.3		147.1	190	166.4	109.4	156.9	228.4	98.6	131.7
1.66667	193.9	228.4	271.5	196.1	185.2	154	179	302.4		143.5	177	161.5	114.4	160.7	237.9	106.8	122
1.68333	195.8	224.9	275.2	202.6	189.4	170.3	203.2	315.8		151	185.8	182	120.9	148	245	115	137.3
1.7	182	217.7	252.9	183.8	184.4	156.2	224.8	328.1		152.1	187.3	190.7	116.5	153.7	232.5	114	124
1.71667	184.6	214.9	246.8	183.3	185.8	166.1	189.5	335.7		146.3	184.8	181.8	118.2	147.7	262.1	116.6	132
1.73333	188.7	225.6	256.1	197.8	186.9	160.9	195.1	322.5		153.7	181.8	171.1	115.8	153.2	238.6	108.4	139.1
1.75	186.5	222.3	268.8	198.9	188.3	147.3	187.9	325.5		152.2	180.9	168.2	118.4	158	224.5	110.3	131.2
1.76667	186.2	217	310.6	201.4	193.4	164.6	183.7	308.6		160.3	177.7	164.8	117.1	157.2	225.3	101.5	129.8
1.78333	191.5	215.3	348.1	203	190.1	164.7	192.6	328.6		160.5	171.2	179.8	119.1	160.5	240.6	96.6	133.4
1.8	179.4	217.9	317.3	206.5	192.9	168.6	219.3	321.1		158.5	171.1	179.8	117.7	159.8	223.7	100.9	129.6
1.81667	185.6	218.8	304	190.4	179.9	156	197.1	323.4		163.9	172	180.5	113.7	157.6	208.1	99.4	131.7
1.83333	177.4	226.1	283.4	187.3	184.2	153.5	216.9	325.6		160.6	170.8	175.3	119.1	155.8	214.7	96.4	122
1.85	209	229.1	292.3	196.9	185.9	151.4	278.8	327.1		157	190.8	175	109.9	157.8	202.8	96.1	137.3
1.86667	193.2	233.7	264.8	219.5	183.7	163.2	219.8	309		154.1	187	167.3	115.8	157.5	232.7	107.9	124
1.88333	182.4	226.2	294.4	233.4	185.1	157.6	205.7	317.2		147.8	189.6	165.6	115.8	154.4	229.7	112.3	132
1.9	181.7	222.1	265.1	229	186.3	163.1	203.1	316.7		152.3	187.8	176.4	111.9	155.3	223.3	116.2	148
1.91667	192	220	268.1	213.5	183.9	112.3	221.2	329.9		147.4	179.1	166	114.4	154.7	229.7	103	137.1
1.93333	184.3	223.5	254.5	207.4	204.2	104.6	228.9	326.7		148	175.6	161.4	112.4	159.3	232	102.6	129.8
1.95	183	224.2	296	179.7	187.3	103.9	234.9	334.2		139.2	175.8	152.9	122.6	163.8	228.8	99.2	137.4
1.96667	189.7	223.8	347.6	212.2	187.4	100.3	231.8	347.4		146.3	180.9	183.7	115.1	161.7	223.1	92	135.1
1.98333	194.1	229.5	345.1	195.3	191	87.8	218.9	345.4		138.9	183.8	190.2	116.6	160.3	219.1	97	152.5
2	190.4	221.5	308	202.8	190.8	85.6	229.6	336		147.9	181.9	188	117.8	161.9	226.4	93.9	152.3
2.01667	197.5	223.2	294.3	203.9	186.1	84.6	218.8	347.3		145.6	172.8	173.8	115	162	224.4	93.8	147.6
2.03333	193.4	224.7	291.9	184.4	191.8	80.5	238.4	330.2		147.3	176.4	172.8	119	157.2	235.8	100.6	138.4
2.05	216.2	216.3	296.5	186.5	188.3	90.9	210.8	318.5		147.6	186.6	167.2	121.8	157.7	230.4	114.1	151.8
2.06667	201.8	225	279.9	182	196.9	101.7	205.3	316.2		160.2	190.6	160	116.7	162.8	220	118.7	148
2.08333	191.4	228.7	296.1	191.6	198.3	123	220.8	332.6		148.1	196.3	172.8	114.9	163.3	218.2	117.1	137.1
2.1	183.2	223.4	254.1	181.3	194.5	128.4	213.9	319.5		152.2	197.7	176.2	123.1	155.4	231.1	107.7	129.8
2.11667	193.9	218.8	267.3	185.9	186.9	129.7	216.3	323.9		151.1	198.9	168.1	116.6	154.5	230.4	101.9	137.4
2.13333	181	224.2	252.3	176.2	193.2	135.5	213.1	330		146.2	204.9	158.5	116.6	164.5	230.1	96.8	135.1
2.15	193.6	231.6	268	186.3	190.3	153.5	251.9	328.9		146.3	206.3	166.4	113.3	161.4	236.1	96.2	152.5
2.16667	193.5	221.3	251.1	204.3	199.3	144.6	282.4	331.8		141.9	215.8	175.8	111.2	163.7	221.7	95.3	152.3
2.18333	193.9	230.2	309.2	189.5	203	144.4	243.9	321.7		152.2	216	175.6	113.7	169.7	228.6	92.4	147.6
2.2	185.3	223.8	347.7	194.1	198.4	133.6	257.3	329.5		146.6	206	168.6	124.8	162.1	243	98.2	138.4
2.21667	184.3	223.3	312.2	173.5	208	144.5	267.8	329.6		144.9	208.5	176.1	101.3	158.1	223.6	102.1	151.8
2.23333	188	224.5	300.1	178.1	207.7	134.3	218.8	333.5		137.8	199	186.5	103.8	163.4	241.3	111.5	148
2.25	186.5	225.7	280.3	188.1	202.2	132.2	238.4	336.7		141.8	211.4	171	104.7	157.3	230.8	108.4	137.1
2.26667	190.6	220.5	265.6	177.2	205.5	137	259.4	324.5		136.5	200.5	170.1	110.2	164	227.4	109	129.8
2.28333	194.9	230.1	275.7	180.4	205.3	141.4	253.7	336.4		137	179.8	169.8	105.8	160.3	236	105.4	137.4
2.3	191.2	225.5	273.5	202.1	200.7	138.8	274.8	346		147.4	183.5	162.3	117.1	171.3	235.3	102.2	135.1
2.31667	199.8	225	265.6	233.1	207.4	124.1	259.4	344.7		134.2	180.6	173.5	110.8	164.1	236.6	92	152.5
2.33333	199.9	225.3	264.6	206	196.4	120	259.4	336.1		135.5	177.8	178.8	106.1	175.6	275.2	99	152.3
2.35	196.9	226.3	305.5	212.4	207.3	100.4	266.3	339		141.2	179.8	177.1	104.9	161	243.9	101.7	147.6
2.36667	202.8	225.3	301.7	190.3	201.8	93.9	202.8	332.7		145.5	204.7	175.3	97.6	163.1	239.6	101.4	138.4
2.38333	196	219.1	300.2	191.7	202.4	91.6	215.9	330.4		138.1	205.1	169.5	109	180.8	244.5	104.7	151.8
2.4	189.6	226.3	278.6	202	201.9	88.5	213.2	340.4		153.1	212.3	164.7	104.9	168.4	249.3	107.6	153.6
2.41667	189.2	224	267.6	182.4	199.3	86.8	215.6	333.5		148.5	211.1	176.4	101.1	179.8	254.5	106.2	156
2.43333	195.6	230	248.6	187.7	198.7	81	236.5	319.5		150	212.6	185.5	109.5	234.9	244	109	154.7
2.45	195.8	236.6	246.5	209.3	201.7	74.9	217.6	322		143.3	209.9	197.5	108	242.1	240.2	104	142.2
2.46667	200.5	230.6	232.3	206.5	197.9	78.1	239	331.8		142.5	230.5	174.5	107.7	249.8	230.8	99.9	150
2.48333	198.1	234.2	235.9	189.6	195.7	100.8	228.6	335.6		136.6	222.1	171.3	109.4	152.1	238.9	101.1	142.6
2.5	195.7	226.7	291.8	178.4	207.1	107.8	243	331		133	218.2	160.3	106	146.7	238.7	99.8	142.8
2.51667	206.7	233.2	332	183.5	198.3	127.2	235.5	329.9		134.4	227.2	182.4	107.3	150.4	262.8	98.4	143.1
2.53333	205.4	220.6	334.3	194.3	199.3	130.8	237.2	327.9		145.5	203.5	181.8	104	150.5	252.1	110.8	137.2
2.55	195.9	229.4	304.6	185.1	205.2	145.4	230.7	320.3		143.1	195.9	166	106.3	152.5	240.5	105.6	153.1
2.56667	191.1	228.5	292.3	189.1	199.5	142.5	253.2	332.6		140.6	198.6	157.7	107.7	148.6	255.5	107.3	153.6
2.58333	192.6	226.7	289.9	188.3	207.9	138.3	228.6	329.1		140.1	213.4	161.1	104.6	150.1	245.4	107.9	156
2.6	192.9	223.7	282	187.1	195.2	141.6	247.4	326.9		140.5	197.5	150.4	99.3	145.8	247.5	104.5	154.7
2.61667	199.7	228.6	301	196	196.4	142.9	236.7	326.5		152.9	213.7	153.2	115.4	152.8	240.9	102.6	142.2
2.63333	187.4	227.2	300.6	207.2	192.9	144.7	237.6	323.5		149.7	210.4	166.7	99.7	145.9	239.7	107.4	150
2.65	191.9	229.5	287.5	208.5	192.3	142.2	236.5	326		146.6	212.2	156.4	112.9	151.2	248.6	98.5	142.6
2.66667	182.3	227.1	266.9	212.9	190.8	139.2	234.9	329.6		153.7	212.1	166.6	80.9	149.7	247.5	98.9	142.8
2.68333	194.6	234.9	265.7	191.7	197.8	143.3	229.2	331.3		161.9	215.4	173.9	86.2	147.2	263.6	104.5	143.1
2.7	203.9	229.8	252.9	185.5	194.2	141.8	261.7	344.3		148.8	219	159.7	148	148.9	229.4	101.5	137.2
2.71667	201.1	232.6	283.6	193.9	192.2	138.2	241.9	317.3		158	215	156.2	127	150.5	239.9	104.4	153.1
2.73333	204.1	229.2	272.9	184.4	187.6	142.6	258.5	332.3		149.5	213.5	153.7	115.6	145.1	241.6	100.5	153.6
2.75	201.7	228.2	279.8	174.2	186.4	128.6	252.7	329.5		147.8	192.9	164.1	110.9	142.5	243.2	107.8	156
2.76667	201.2	236.5	259.4	181.3	188.6	140.3	240.4	329.8		138.5	196.5	171.9	109.3	153.6	231.6	100	154.7
2.78333	210.7	225.6	279	204.8	193.9	116.1	247.6	336.3		138.4	196.4	175.6	114.1	151.6	235.2	102.6	142.2
2.8	206.5	236.7	294.3	198.4	181	110.6	244.2	341.6		135.3	199.1	162.1	111.1	159.6	233.8	103.2	150
2.81667	211.8	229.2	269.1	183	183.9	97.8	248.9	326.1		141.9	208.5	161.3	119.6	151.3	236.6	108.6	142.6
2.83333	204.3	232.5	271.6	190.5	187	103	241.7	309.1		136.6	207	162.6	157.9	151.5	232.5	99.5	142.8
2.85	192.9	225.8	251	185.6	184.4	95.8	228.1	305		140.8	204.8	168.8	148.3	153	232.2	97.8	143.1
2.86667	185.2	236.1	239.9	208.5	181.7	93.2	250.2	324.6		148.1	204.1	170.1	137.2	161.6	219	94.6	137.2
2.88333	184	236.6	253	208.3	181.7	89.5	240.1	325.3		151.2	201.1	175.6	125.9	144.1	234.9	99.5	153.1
2.9	189.4	240.4	255.4	206.8	197.8	90	250.5	334.3		160.9	195.8	158.5	115.4	154.9	229.8	98.7	144.1
2.91667	188.7	225.8	285.5	202.3	194.7	102.9	247.2	323.9		164.6	210.5	162.2	111	160	241.9	102.3	150.2
2.93333	198.7	224.6	307	209.7	183.7	114.2	243.9	331.6		163.9	224.5	156.4	95.5	141.6	220.4	101.9	160.9
2.95	190.6	231.9	345.2	216.2	185.4	132.1	249.4	328.5		157.8	218.9	180	91.6	157.8	202.5	102.4	147.5
2.96667	195.2	224.4	354.1	209.6	189.2	145.6	254.1	327.3		160.3	221.3	184.8	91.9	157.3	232.9	111	145.7
2.98333	193	230.1	327.8	195.6	184.8	142.8	261.8	316.8		154.7	251.7	190.3	105.9	153.2	222.4	107.4	157.2
3	192.4	228.6	315.6	207.4	195	140.9	260.5	334.2		152.5	228	173.5	116	155.4	224.1	103.3	149.4
3.01667	193	234.1	329.5	182.7	191.2	143.2	261	328.6		141.6	222.6	172.4	111	151.9	224.4	105.8	149.8
3.03333	197.6	225.7	279.5	203	190.6	148.2	269.7	318.3		134.6	230.1	161.1	114.8	150.7	228.2	103.2	153
3.05	209.2	234	285.3	209	186.9	144.2	264.4	332.2		137.8	217.1	160.6	117.8	151	221.2	103.5	152.2
3.06667	212.7	231.1	298.3	203	184.4	143.6	223.3	323.7		140.5	221.4	159.2	113.9	146.6	229.1	101.9	144.1
3.08333	204.7	230.3	307.8	190	193.1	129.5	236.5	322.7		137.5	230.1	181.8	115.9	147.5	236.6	101.6	150.2
3.1	209.8	232.2	299.1	193.1	197	124.5	250	327.3		136.5	237.9	180.1	117.7	162.4	224.8	108.2	160.9
3.11667	202.1	229.3	293.3	204.3	183.9	105.3	237.3	333.7		140.2	228	163.3	121.9	151.2	237.2	104.2	147.5
3.13333	221.9	235.3	263.9	211.8	191.9	97.3	226	333.5		141.4	223.2	169	124	147.6	227.7	108.5	145.7
3.15	210.3	232.9	252.7	205.1	188.8	94.7	233.9	334.2		139.4	217.3	167.9	115.7	155.6	229.9	112.6	157.2
3.16667	207.1	233.7	265.4	197.7	188.4	89.5	248.1	323.4		143.7	213.3	184.5	105.4	156.5	238.2	108.6	149.4
3.18333	208.6	233.5	298.6	180.2	190.2	102.4	247.6	324.1		156.6	221.1	181.5	112.4	157.5	237.4	105	149.8
3.2	215.4	248.2	330.9	178.8	199.4	114.8	229.5	330.3		164.7	226.9	165.5	112.8	161	244.7	102.7	153
3.21667	196.8	229.3	333.7	180.2	201.3	129.2	236.2	340.6		155	230.9	158.4	110.3	156.7	233.8	99.7	152.2
3.23333	194.4	237.3	297.4	194.8	190.9	151.5	238.5	326.6		157.4	241.2	150.3	114.1	154.8	247.5	102.4	144.1
3.25	208.3	235.3	292	200.6	191.2	140.6	231.7	326.4		159	230	146.8	120.5	154	250.7	104.8	150.2
3.26667	214.9	234.1	279.9	201	189.3	146.7	231.9	335.7		160.4	237.9	153.9	113.1	153.3	245.5	104	160.9
3.28333	215.2	239.7	268.7	197.7	198.6	152.7	226	334.5		158.3	229.7	165.3	121.5	152.6	246.9	108.8	147.5
3.3	207.8	231.1	262.2	181.3	187.9	161.1	228.5	340.9		145.3	219.3	185.4	116	152.6	229.7	104.2	145.7
3.31667	216.8	238.8	259.7	184.7	188.5	155.5	230.5	325.5		148.6	229.2	173.3	127.9	156.6	240.3	104	157.2
3.33333	209.3	232.9	302.5	187.9	191.5	152.9	249.6	352.6		142.4	228.3	168.2	117.6	149.8	233.8	106.1	149.4
3.35	206.5	231.4	339.3	188.1	195.8	155.8	236.6	341.8		133.5	230.7	167.9	112.1	148.5	241.5	104.1	149.8
3.36667	199.6	244.4	356.1	206.3	184.9	156.6	228	342.8		142	231.1	158.7	110	149.5	229.3	100.3	153
3.38333	198.5	235.5	298	184	203.1	155.5	235.1	335.4		140.8	223.7	166.6	119	158.4	256.9	94.2	152.2
3.4	194.5	242.9	304	212.5	206.7	139.7	228.7	326.5		148.6	229.4	181.5	116.5	154.2	227.3	100.8	160
3.41667	189.8	232.9	282.3	199.7	191.2	148.5	243.1	332.6		142.6	214.3	166.8	108.2	154.9	233.5	103.3	150.1
3.43333	208	233.8	280.8	198.3	182.4	154.4	234.9	347.8		150.4	227.9	161.6	119.6	149.1	241.8	100.5	152.4
3.45	211.8	242	293.5	178.6	194.9	152.4	233.1	332.5		152.9	242.8	158.4	117.8	151.2	247.1	100.7	147.6
3.46667	211.7	241.8	265	181.4	186.9	156.4	221.3	344.1		151.2	228.2	182.3	116.8	163.5	231.6	104.6	156.1
3.48333	207.9	234.1	287.9	202.5	191.1	154.3	236.7	346.3		152.1	252.1	190	117.4	160.4	247.3	108.5	154.4
3.5	204.6	239.3	268	190.7	185.3	188.1	231	343.8		142.3	225.7	174.9	125.1	156	243.2	108.5	155
3.51667	203.6	235	260.4	208.5	196	159.2	228.9	343.5		145.4	225.1	175.4	117.3	157	254.8	111.1	166.2
3.53333	202.3	254.5	271.8	214	183.4	180.4	243.4	346.1		139.5	220	178.8	135	150.4	241	104.3	168
3.55	209.3	236.3	287.3	225.2	190.5	150.6	239.7	333.6		146.9	205.5	177.2	129.1	149.8	242.7	99.8	160.7
3.56667	209.1	243.2	280.1	215.8	184.2	141.6	239	329.7		148.4	217.9	167.1	131.4	154.2	255.2	102.3	160
3.58333	207	236.8	280.2	200.4	188	134	247.8	323.6		143.3	219.3	163.3	124.3	150.8	234.4	103.5	150.1
3.6	205	231.2	274.2	201.5	194.7	110.2	246.9	337.4		139.5	211.6	150.5	124.6	153.7	257.1	102.9	152.4
3.61667	213.3	242.2	265.6	188.9	195.4	107.4	246.3	331.3		147.4	208.3	152.2	110	148.1	241.2	103.9	147.6
3.63333	212.1	239.2	285.1	218.4	186.6	100.5	259.9	330.3		149.3	222.8	171.8	121.9	146.2	248.8	102.8	156.1
3.65	219.5	244.3	287.8	203.1	182.2	95.7	239.5	333.7		143.9	239.5	170.3	122	152	233.5	108.3	154.4
3.66667	221.5	246.7	288.6	200	189.1	106.5	245.6	333.5		154	238.4	167.1	118.7	160.9	237.7	102.7	155
3.68333	223.6	244.2	282.5	189.1	181.1	114	251.3	339.4		157.4	248.9	178.7	128.2	146.7	226.4	111.2	166.2
3.7	226.2	237	281.4	196.6	182.8	125.3	236.7	346.3		146.1	249.3	172.2	131.2	149.1	239.3	106.7	168
3.71667	216.8	236.1	275	202.2	180.3	139.4	230.6	340.2		149.1	260.9	158.2	131.4	143.5	233.6	112.5	160.7
3.73333	213.2	245.1	264.3	191.4	182.9	161.5	246.8	331.9		143.1	252.5	166.7	126.9	151.4	242.2	99.5	160
3.75	214.4	239.2	277.5	183.6	177.9	147	235.7	340.2		148.3	242	167.9	129.2	154.7	246.2	98	150.1
3.76667	208	241.5	314.2	210.5	185	171.9	238.7	333.5		144.8	222.9	181.9	124.4	151.6	224.3	93.6	152.4
3.78333	207.2	242.2	329.1	208.3	191.1	160.4	237.4	353.6		143.9	221.6	175.9	143.4	153.1	247.6	98.5	147.6
3.8	198.2	235.5	293.3	192.3	189.2	159	234.6	340.9		137.2	215.9	164.3	131.3	146.1	243.9	103.8	156.1
3.81667	197.4	242.2	288.9	196	180.7	143.8	230.7	331.9		143.2	220.8	167.2	118	142.6	248.4	109.4	154.4
3.83333	207.6	245.8	266.4	197.2	189	147.3	235.3	335.8		147.1	239.4	164.8	128.1	148.9	226.3	102.5	155
3.85	203.5	242	320.8	210.3	179.7	144.4	234.9	334.9		144.4	247.6	166.2	128.2	147	249.5	105.4	166.2
3.86667	191.7	234.5	282.8	196.5	182.7	147.9	229.9	334.9		164.6	259.5	157.2	119.1	149.5	263.3	109.4	168
3.88333	203.9	246.3	274.1	205.6	182.3	151.9	231.1	337.5		148.9	276	157.7	120.2	159.4	251.5	102.3	160.7
3.9	209.8	246.5	261.4	208.9	183.9	142.4	242.4	334.8		152	296	174.1	121.4	163.7	234.3	100.4	171
3.91667	200.8	239.3	262.5	203.3	182.2	148.2	236.9	345.5		143.8	285.9	185.9	117.1	156.6	233.4	103	168.1
3.93333	207.7	242.7	266.6	213.7	180.7	161.8	226.5	333.3		150.1	282.8	185.6	128	157.6	238.9	96.4	176.8
3.95	209.4	241.9	307.5	205.8	197.4	161.3	228.2	336		159.9	275	194.7	126.8	149.7	250.3	95.8	174.8
3.96667	221.5	240.3	338.4	197.9	195.1	154.9	223.2	370		151.8	271.1	178.5	127.9	155.1	246.6	97.2	178
3.98333	222.8	244.1	365.2	220	193	165.8	230.7	339.3		146.2	264	166.8	134	156.5	246.5	108.2	176.6
4	210.4	240.2	308.6	222.4	192.5	155.7	232.5	343.1		148.7	269.3	171	125.3	152	246.5	103.2	179
4.01667	224.1	254.5	312.1	221.9	199.1	156.2	225.9	339.8		147.6	274.2	173.2	120.3	159.3	261.7	108.9	177.2
4.03333	225.5	251.5	291.5	227.5	193	157.4	220.9	331.2		141.5	257.2	166.8	121.5	158.1	240.2	111.3	174.5
4.05	213.9	245.7	288.6	236.4	181.1	156	231.2	341.8		139.6	234.8	164.3	121.8	151	262.8	109.5	169.9
4.06667	212.4	255.1	266.2	223.5	184.5	162	253.8	336.5		137.7	249.3	161.7	170.1	149.2	265.9	109.2	171
4.08333	204	251.3	249.3	216.7	184.1	167.1	253.9	326		135.9	245.6	160.4	200.6	151	251.7	103.2	168.1
4.1	208.7	258.5	268.6	212.8	196.8	162.8	259.3	333.4		140	247.7	153.1	178.7	155.3	264.1	99.4	176.8
4.11667	203.6	245.3	272.4	240.2	184.2	164.4	254	339.9		138.7	256.2	154.2	176.7	156.6	257.7	99.3	174.8
4.13333	203.8	250.5	316.1	202	177.1	175.8	258.8	336.1		149.6	257.5	152.6	158.1	154.6	247.6	103.1	178
4.15	207.5	244	352.1	201.1	178.6	157.2	277.5	337.5		150.8	255.6	141.2	153.7	152.1	254.6	95.4	176.6
4.16667	206	244.3	318	196.7	169.4	164.9	252.7	341.2		152.5	264.6	161.4	140.1	162.4	235.4	107.8	179
4.18333	214.1	247.6	307.2	207.4	182.4	166.9	257.9	333.1		154	261.6	179.3	140	153.1	257.3	101	177.2
4.2	213	247.8	280.3	199.4	181.7	189.5	237.7	328.1		153.8	250.6	165.6	138.1	155.9	269.5	106.2	174.5
4.21667	207.9	244.3	273	227	171.9	170.5	227.3	346.6		150.5	252.6	157.6	147.4	164.1	253.6	107.1	169.9
4.23333	219.5	239.3	260.8	218.5	180.1	174.2	239.8	345.4		155.5	264.4	176.3	141.9	149.7	263.4	103	171
4.25	218.3	233.3	273.9	228.1	185.5	190.3	242.9	335.4		150.1	255.8	171.9	150.1	150.5	243.3	106.6	168.1
4.26667	225.9	247.5	278.5	215.4	185.6	167.6	234.5	338.4		149.1	256.6	175.9	141.8	147.9	250.1	102	176.8
4.28333	228.4	245.6	297.2	218.2	184.5	152.3	229.8	344.1		149.4	266.4	177.9	128.1	154.3	250.9	100.1	174.8
4.3	238.7	236.8	282.4	195.8	188.3	137	217.8	343.5		150.1	259.2	167.9	127.9	149.2	274.7	100.2	178
4.31667	218.5	241.5	306.2	205.5	182.1	124.2	235	353.6		146.4	273.7	161.2	122	149.2	269.8	103.9	176.6
4.33333	228.8	240.3	281.4	212	183.1	116.9	228.1	340.3		147.9	282.1	164.5	122.6	163.7	269	103.3	179
4.35	232.6	249.4	302.3	191.4	189.7	110.2	237.5	337		149.8	270.7	182.3	122.2	154	249.5	102.9	177.2
4.36667	221.9	243.3	322	199.5	188.3	106.6	232.5	336.6		151.7	263.3	161.9	124.3	156.3	249.6	112.1	174.5
4.38333	208.4	246.3	290.4	219.3	187.3	115.3	222	323.3		157.5	259.7	192.4	135.4	151.9	258.8	108.1	169.9
4.4	225.8	243.1	280.7	245.3	177.4	105.8	248.7	344.9		153.1	259.6	186	135.8	155.7	242.6	112.2	174.7
4.41667	224	246.3	274.5	226.6	174.3	104.6	238.2	344.2		147.8	255.7	164.8	137.4	146.7	257.9	110.7	169.3
4.43333	222.7	246.7	257.9	207.3	184.4	102.2	243.3	354.2		154.5	262.4	156.5	152.3	154.6	254	103.4	184
4.45	223.2	242.9	251.9	213.8	171.9	109.3	241.7	334.5		150.6	252.9	147.6	138.6	152.7	245.7	97.3	178
4.46667	237.7	252.6	249.7	201.5	185.9	128	243.5	341.9		147.8	275.2	144.6	130.6	156.3	243.3	97.8	187.3
4.48333	227.2	246.9	264	207.9	186.2	146.8	220.1	337.2		155.2	258.8	153.5	133.3	156.2	258.3	106.1	187.3
4.5	223.9	252.4	264.7	211.3	184.5	149.3	233.2	328.6		138.9	279.3	164.9	125.9	152.2	256.1	114.4	180
4.51667	213.8	247.9	317.8	218.6	183	157.4	227.5	333.9		146.9	256.9	173.1	130.6	146.2	248.5	102.5	173.5
4.53333	208.9	254	368.1	206.3	179.5	176.4	222.4	348.9		140.9	271.1	165.1	127.5	169.1	252.7	110.2	182.4
4.55	205.8	249.6	357.8	215.9	179.6	173.2	231.2	332		147.4	290.5	168.4	123.9	151.7	263.9	111.2	192.2
4.56667	212	249.5	317.2	220.8	174.1	180.6	222.8	345.3		144.5	285.8	161.9	131.5	150.9	260	111	174.7
4.58333	229.4	251.6	319.3	215.8	187.4	187.4	228.9	336.1		152.2	295.5	165.9	135.1	152.3	262.3	105.5	169.3
4.6	202.7	243.5	296.8	204.3	172.9	179.4	225	355.8		154.1	293.5	177	133.8	146	267.5	102.6	184
4.61667	213.7	251.1	290.5	206	181.5	175.7	222.9	350.8		152.9	269.4	175.3	130.7	157.5	275.3	100.1	178
4.63333	220.9	252	278.4	198.7	178	178.6	215	342		149.3	263.1	152.6	146.5	149.2	261	103.8	187.3
4.65	210.9	245.6	285.2	199.8	176.3	183.7	218.8	337.2		149.7	262.5	155.8	141.1	155.7	265.6	100.6	187.3
4.66667	220.4	252.7	314	219.1	184.2	173.7	219.6	341.1		149	270.5	167	133.7	156.9	270	103.5	180
4.68333	207.4	252.4	306.7	206.6	186.8	179.1	224.3	342.2		159.5	268.5	185.3	135.9	152.4	254	101	173.5
4.7	218.1	241.6	278.9	203.5	176.4	172.3	231.7	340.7		154.1	286.4	193.4	139.4	151.9	277.1	106.2	182.4
4.71667	218.5	239.7	285.6	192.1	180.4	178.3	210.1	331.6		151.7	270.9	169.5	130.5	151.1	260.1	110.5	192.2
4.73333	224.5	245.9	265.9	186.3	174.9	182.6	218.6	324.4		145.5	298.5	160.9	130.1	148.2	267.7	110.7	174.7
4.75	222.7	244.1	271.7	217.9	173.7	180.9	245.5	340.6		146.8	295	161.7	125	150.2	266.4	109.4	169.3
4.76667	229.6	247.5	251.6	217.3	176.9	186.3	227.3	352.5		157.7	297.1	159	120.1	146.5	269	103.2	184
4.78333	228.5	252.4	258.8	218.4	171.3	180	218.1	339.8		150.6	292.4	159.2	128.5	152	249.4	105.4	178
4.8	231.5	244.1	272.9	218.6	184.3	210.4	218.2	338.6		155.8	294	164.6	128.4	151	257.6	98.7	187.3
4.81667	220.3	244	308.3	215.6	188.6	225.3	231.5	336.9		151.3	280.2	171.7	130	149.8	277.1	103	187.3
4.83333	230	250.1	290.9	218.5	183.3	199.8	212.9	339.9		151.4	268.4	176.3	141.8	153.9	274.6	104.2	180
4.85	215.1	252.2	307.4	204.7	176.9	186.7	230.6	343.3		156.7	262.7	173.5	133.4	158.7	260.1	103.4	173.5
4.86667	225.4	248.2	264.1	200.7	180.3	199.2	230.6	342.5		147.8	264.1	165.6	143.7	150	272	118.9	182.4
4.88333	218.2	241.2	274.3	213.8	179	180.6	228.4	346		163.1	276.4	165.6	128.1	158.8	268.8	107	192.2
4.9	229.8	239.7	323.2	232.7	187.1	190	225.3	332.1		144.6	295.5	153.8	130.7	158.3	266.4	114.6	183.1
4.91667	224.3	241.1	329.6	227.7	184.4	188.9	235.1	328.9		145.3	287.4	147.1	117.7	156	280.8	105.6	180.3
4.93333	237.9	244.6	296.9	221.8	174.7	191.8	227	339.9		142.6	290.1	167.9	118.4	154.8	273.9	105.1	189.6
4.95	221.1	253.3	276.2	204.1	181	201.8	234.5	350.5		145.8	291.2	179	116.8	155.9	284.9	100.4	193.8
4.96667	237.3	253	268.7	217.1	182	194.2	228.6	341.8		141.9	301.5	164	125.8	153.3	299.5	108.3	189.5
4.98333	227.4	251.8	264.6	231	179.3	193.8	218.1	345		146	314.6	163.9	127.3	148.4	279.3	106.8	191.3
5	238.6	245.3	307.1	227.2	180.5	196.1	210.5	357.5		151.8	314.3	156.2	127.4	154	282	103	186.2
5.01667	217.9	262.5	339	224.5	179.8	195.2	226.4	350.5		153.7	297.8	171.2	132.6	158.7	268.7	107.9	175.2
5.03333	221.1	243	338.3	207.8	179.1	180.6	218.9	331.9		140.4	306	176.4	134.3	150	255.2	108.8	201.1
5.05	217.3	256.4	308.9	207.9	170.8	187.2	242.2	357.8		151	288.6	181.6	142.2	151	286.2	114.6	185.4
5.06667	216.1	256.2	289.1	201.7	174.9	198.7	213.8	360.9		146.1	275.6	183	140	156.2	302.3	113.2	183.1
5.08333	221.6	246	285.8	230.3	173.9	196	229.4	335.7		142.2	297.9	187.3	142.2	160.1	273.5	109.1	180.3
5.1	221.9	251.2	265.6	233.3	178.4	196	244.1	352.3		151.7	287.6	175.9	131.9	151.9	273.3	116	189.6
5.11667	229	253.3	267.8	228.3	176.7	202.2	248.6	342.1		159	283	173.6	129.6	162	263.3	105.4	193.8
5.13333	213.8	263	256.9	216.7	173.7	204.1	239.4	340		149.1	322.3	160.6	128.3	159.5	268.4	108.4	189.5
5.15	229.5	248.4	261	207.1	189.7	203.5	237.1	345.5		148.2	295.2	164.3	130.4	163.4	272.9	108	191.3
5.16667	223.6	255.5	258	201.3	175.1	210.6	255	338.7		144	294.5	174.6	123.7	155.6	284.7	115	186.2
5.18333	224.8	251.5	262.9	198.7	180.5	203.7	238.2	343.3		142.6	304.5	192.1	126.5	152.6	289	108	175.2
5.2	242.1	262.9	253.7	230.9	185.3	212.9	249.2	358.1		146.8	298.3	175	125.4	161	264.2	116.8	201.1
5.21667	240.1	255.5	266.8	254.8	172.8	211.1	262.7	345.6		146.7	300.6	169.3	130.8	152.6	276	117.6	185.4
5.23333	247.9	252	294.9	252.8	183.1	196.9	252	335.2		161.9	309.7	174.3	139.6	156.2	275.1	117.2	183.1
5.25	237.3	253.6	288	247.5	181.4	198.4	242.4	339.3		156.6	289	176.8	141.5	156.2	270.6	113.6	180.3
5.26667	242.8	245.6	277.8	237.3	182	202.1	230.5	327.8		152.7	295.4	171.7	141.8	162.7	285.2	112.3	189.6
5.28333	241.8	248	257.1	216	183.8	216.9	236.4	345.2		154.2	294.7	157.7	148.3	161.1	266	110.3	193.8
5.3	230.1	245.1	276.1	226.4	185.5	213	229.4	345.4		151.5	296.6	158.3	134	161.6	292.2	119.2	189.5
5.31667	270.6	244.2	280.1	235.9	176.3	195.6	245.9	348.4		170.7	310.6	171.6	135.6	156.5	298.2	106.8	191.3
5.33333	267.8	259.7	281.1	243.2	177	189.9	240.7	349.8		149.4	311	189	144.2	162.3	279.4	108.7	186.2
5.35	299.5	256.1	263.2	236.9	179	172.2	239.6	348.6		144.5	324.6	184.8	133	167	286.5	117	175.2
5.36667	277.3	253.4	252.8	251.5	183.1	170.9	249.8	333.2		150.9	328.3	176.3	138.5	155.4	293.3	115.9	201.1
5.38333	286.6	253.7	273.4	235.8	181.7	164.8	241.2	372.2		151.8	332.1	167.1	132.3	158.7	308	118.4	185.4
5.4	266.2	247.5	300	247.3	179.5	163.3	247.2	363.8		153.7	335.8	169.4	128.2	162.6	312.1	112.8	198.7
5.41667	272.7	251.4	271.7	231.6	178.4	149.7	243.1	341		152.7	330.3	159	130.9	161.4	308.6	113.3	190
5.43333	257.1	268.2	268	231.1	173.9	146.7	248.1	347.3		150.3	306.7	164.4	136.4	179.4	298.1	113	186.6
5.45	261.6	266	303.5	255.7	172.2	136	249.3	339.8		152.7	323.4	180.9	128.1	161.3	293.3	107	208.4
5.46667	251.9	253.9	280.1	250.1	178.4	147.6	248	347.6		161.5	300.7	188.8	139.1	167.8	282.3	110.4	199.8
5.48333	239	245.6	286.3	234.3	183.5	134.4	256.2	348.4		155.6	313.6	176	143.4	165.1	289.7	112.2	197
5.5	247.8	258.2	300.9	222.8	178.2	151.3	248.9	339.5		154.9	315	186.4	137.2	160.1	305.2	113.3	203.5
5.51667	232.6	251.2	306.4	220.9	177.5	164	245.9	335		151	330.1	182.5	141.6	166.4	284.3	114.3	197.3
5.53333	236.2	247.8	276.9	224.9	175.9	202.2	254	348		146.3	320.6	175.5	141.7	161.1	285.1	113.5	211.4
5.55	232.5	249.3	273.6	244.1	173	194.1	246.2	348.1		146.8	328.4	166.4	123.5	165.9	289.7	113.4	198.8
5.56667	242.4	253.7	295	241.2	177.2	221	259.7	335.1		151.3	334.8	166.8	133.6	168.2	293.1	106.5	198.7
5.58333	241.1	255.7	298.1	241.8	179.9	250	244	354.4		147.8	363.6	170.4	135.1	172.1	299.8	107.1	190
5.6	242.9	258.6	311.2	237.2	177.7	227.2	247.1	337.2		151.8	336.5	172.2	128.7	164.1	293.6	111.7	186.6
5.61667	237.5	245.9	316.9	237.5	182.5	228.4	245	340.8		154	336.2	187.4	132.5	172.3	284.3	114.1	208.4
5.63333	236.6	260.5	287.6	236	175.3	242.9	243.2	358.6		158.7	330.1	191.6	128.7	167.7	303.7	108.6	199.8
5.65	256.9	249.9	282.7	244	183.1	244.3	247.2	343.4		156.5	330.3	171	131.9	173.5	288.3	112.3	197
5.66667	250.4	254.3	267.9	244.4	188.2	230.7	241.6	349.5		160.5	312.4	166.5	150.6	173.9	281.8	119.5	203.5
5.68333	257.8	251.3	327.9	241.6	180.6	228.3	252.4	351.1		153.1	332.3	161.7	144.2	168.9	306.7	115.6	197.3
5.7	270.4	253.7	320.8	241.9	179.8	229.3	236.7	342.7		161	319.8	163.4	141.1	173	280.1	118	211.4
5.71667	252.9	253.8	297.7	240.9	181.2	232.3	237	345.8		151.6	347.4	175.8	148.6	177.8	280.8	109.5	198.8
5.73333	253.6	252.1	303.6	228.3	179.2	232.3	243.7	346.2		145.3	330.8	164.8	138.1	172.3	299.7	113.5	199.2
5.75	249	256.2	292.4	250.4	178.6	237.5	232.1	352.8		148.4	342.5	153.4	135.4	178.9	300.7	112.1	199
5.76667	242.2	252	297.5	256.7	178.1	237	237.2	352.4		152.1	343	156.4	137.8	168.4	287.8	108.3	197.1
5.78333	253.8	247.4	295.1	255.3	181.7	239.4	247.8	337.6		152.3	349.7	177	129.9	168.4	310.4	123	198.8
5.8	239.1	251.7	294.9	277.4	179.6	244	233.9	342.3		158	362.3	180.8	133.3	171.6	293.5	142.5	195.4
5.81667	238.1	244.7	282.4	266.4	174.6	241.8	223.3	353		168.4	377.8	184.2	137.9	179	295.9	140.5	195.8
5.83333	238.5	250.5	299.3	267.9	173	249.6	236.5	345.7		160.2	348	188.4	138.8	170.8	314.8	126.8	189.6
5.85	252	250.8	283.8	237.5	184.1	238.8	250	351		165.9	354	174.1	134	173.7	305.5	115.2	191.2
5.86667	241.2	245.9	278.1	248	179.6	254.7	237.3	347.2		150.5	361.8	174.2	141.6	173.9	313.4	115.4	209.7
5.88333	234.9	257.1	288	254	179.8	239.7	226	359		149.1	351	166.5	137.4	168.9	312.6	119.8	211.2
5.9	243.4	253.7	294.3	265.5	172.1	257.6	233.9	359.2		152.7	345.8	171.2	137.8	182.7	310	118.7	199.2
5.91667	238.6	251.4	302.6	236.7	182	243.5	248.1	347.1		150.4	340.3	179.2	148.5	167.1	311.4	128.5	199
5.93333	260.1	257.3	285.5	236.5	188.3	232	247.6	349.8		144	346.1	170.4	144.2	171.2	322.8	120.4	197.1
5.95	262.6	250.9	272.1	254.7	176	259	229.5	357.1		150.9	355	164.5	132.3	171.5	315.5	129.6	198.8
5.96667	253.5	250.1	283.7	240.8	178.8	237.9	236.2	339.9		154.5	362.6	168.8	139.9	185.5	336.9	122.9	195.4
5.98333	254.8	253.8	301.2	236.8	182.5	251.6	238.5	360.3		163	356.5	189.7	135.6	169	320.2	123	195.8
6	242.5	248.1	341.4	245	187.3	256.4	231.7	353.1		165.6	382.9	184.8	120.8	175.6	319	117.5	189.6
6.01667	255.4	244.7	311.4	245.7	179.6	258.1	231.9	350.8		155.2	378.1	172.9	132.8	172.3	314.9	115.7	191.2
6.03333	241.3	247.3	299.7	254.1	178.4	265.9	226	348.8		156.5	378.3	175.9	127.8	173.3	332.7	112.3	209.7
6.05	252.1	253.1	275	267.5	188.1	258.8	228.5	358.8		163.9	377.7	162.2	131	173.6	324.2	120.1	211.2
6.06667	239.8	258.3	284.8	267.6	189.3	269.7	230.5	346.8		153.8	364.3	164.6	138.5	170.9	310.4	118.4	211.7
6.08333	232.2	251.2	275.7	268.7	174.8	260.9	249.6	347.8		152.8	373.2	168.5	137.1	180.2	332	117.4	216.8
6.1	243.8	253.8	294.4	257.1	187.9	257.6	236.6	350.1		151.9	375.4	174.1	139.5	170.5	333.8	121	215.9
6.11667	239.4	250.2	285.3	248.6	181.9	251.2	228	358		158	406.2	170.1	142.6	168.8	324.2	125.6	204.9
6.13333	250.3	239.8	323.4	239.1	181.9	251.4	235.1	345.1		151	411.4	166.5	139.7	175.3	309.8	123.4	223.5
6.15	251.1	247.7	299.6	254.6	190	252.6	228.7	354.7		150.9	391.2	169.5	139	162.7	305.4	112.3	214.3
6.16667	258.6	247.6	284.1	268.7	192.8	245.2	243.1	352.8		151.9	395	166.2	139.9	169.6	338.7	112.8	217.6
6.18333	254.8	244.1	307.3	295	187.2	254.6	234.9	355.3		152.5	393.2	171	135.2	170.9	337.4	110.8	190.4
6.2	263.8	251.2	310.2	281.1	183.3	253.6	233.1	351.5		160.7	380.1	161.5	124.7	172.6	322.6	116.8	201.8
6.21667	265.1	247	302.7	254.1	187	242.4	221.3	355.9		166.4	370.5	161.3	134.2	176.1	335.6	119.7	209.2
6.23333	263.2	247	278	245.5	183.6	256	236.7	341.1		148.2	352.2	166.7	127	172.6	321.8	122.6	211.7
6.25	248.6	244.5	261.3	254.2	179.7	246.1	231	343.1		151.7	379	188.8	121.9	171.5	333.9	125.7	216.8
6.26667	252	247.8	277.6	255.3	182.7	228.8	228.9	342.5		144.3	357.8	201.7	128.5	177.7	326.9	128.8	215.9
6.28333	253.1	242.3	329.8	251.8	194.1	222.2	243.4	345		158	377.7	193.5	137.2	173.5	335.2	120.3	204.9
6.3	254.7	249.7	306.8	259.8	185.5	220.5	239.7	342.5		162.4	374.8	177.1	136.9	180	328.4	118.5	223.5
6.31667	259	246.6	291.1	246	180	205.4	239	332.4		148.4	381.7	185.3	143	173.8	336.7	117.5	214.3
6.33333	246.7	244.9	285.8	241.8	183.4	237.6	247.8	338		159.9	378.6	178.2	141.7	165	338.9	115.9	217.6
6.35	251.8	245	306.8	295.1	187.5	194.9	246.9	340.3		160.6	401.5	182.8	144.8	172.8	339	117.7	190.4
6.36667	244.8	248.4	370.9	301.3	190.6	210.3	246.3	334.4		160.3	409.9	168.7	134.6	164.9	340.4	125.3	201.8
6.38333	247.1	245.4	334.6	298.2	189.1	186.8	259.9	336.5		161.5	435.4	168	132.7	174.8	344.5	124.8	209.2
6.4	245.4	246.8	304	270.3	179.9	188.1	239.5	356.7		153.9	399.8	160.7	132.9	176.4	332.9	122.2	211.3
6.41667	245.7	260.2	304.7	278.7	194.4	197.6	245.6	343.9		156	403	186.7	126.4	170.8	345.3	124.5	205.2
6.43333	245.7	236.9	299.2	256.7	187.6	220.5	251.3	333.8		152.7	380.6	194.8	128.8	181.3	336.2	123	220
6.45	248.7	244.5	286.6	270	196.9	222.3	236.7	335.8		144.1	382.6	194.2	129.8	172.7	363.5	117.9	209.2
6.46667	258	235.5	283.3	288	198.3	235.2	230.6	347.9		149	385	181.9	136.1	175.6	325.1	115.9	222.3
6.48333	251	248.8	304.1	271.2	197.2	253.1	246.8	338.5		157.1	376.1	178.8	131.8	173.4	335.6	120	213.6
6.5	241.2	243.1	331.5	259.3	191.8	250.5	235.7	337.2		154.6	392.8	165.4	136.8	178.6	338.7	125.6	227.2
6.51667	258	242.6	372	251.3	191.5	265.1	238.7	351.2		149.6	392.7	167.9	143.4	167.7	329.4	130.7	227.1
6.53333	246	237.1	317.2	251.8	188.5	249	237.4	343.3		150.6	384.5	167.4	131.7	175.5	337.5	125.2	227.8
6.55	277.1	240.9	319.5	251	185.8	259.4	234.6	345.8		155.1	397.1	162.4	152.2	176.3	333.8	124.6	240.1
6.56667	250.8	246.6	285.2	264.2	184.6	255.8	230.7	331.3		156.4	408.5	157.9	141.5	173.1	343.9	119.5	211.3
6.58333	246	251.9	317.6	265.1	187.2	260.4	235.3	349.8		145	418.3	170	145	175.3	354.5	115.4	205.2
6.6	243.8	240.6	348.9	265.6	183.9	251.8	234.9	353.3		152	422.8	194.4	142.4	167.6	331.1	115.3	220
6.61667	241.8	249.4	317.7	265.1	191.5	267.9	229.9	346		157.7	409.1	176.1	137.1	173.8	342.6	114	209.2
6.63333	244.3	235.9	343.5	256.8	185.1	263.7	231.1	332.8		157.3	404.5	165.4	127.9	179.8	337.1	124.1	222.3
6.65	238.6	228.8	306.3	248.8	187.4	256.2	242.4	351		151.9	459.9	166.7	131.4	164.2	356	127.3	213.6
6.66667	246	229.9	303.1	257.5	183.4	282.3	236.9	344.6		148.7	450	174	133.3	175.6	365	123.9	227.2
6.68333	236.3	241.5	288.6	260.4	195.3	258.4	226.5	340.2		150.4	444.8	181.3	122.2	173.2	343.9	120.6	227.1
6.7	238.6	237.6	283.7	258.8	194	280.4	228.2	336.4		150	454.5	183.9	136.7	175.7	344.8	117.3	227.8
6.71667	247.9	242.2	291.2	260.6	195.7	260.6	223.2	349.6		155.4	433.5	174.2	136.5	187.2	347.2	126.3	240.1
6.73333	255.4	246.6	281.2	265.2	191.7	261.8	230.7	338.6		157.5	438.8	196.6	133.9	177	347.9	121	247.2
6.75	254.3	235.7	321.4	287.3	198.6	259.8	232.5	345.5		160	425.3	199.2	149.1	188	354.7	131.3	265.8
6.76667	257	237.6	357.4	280.4	190.1	264.5	225.9	329.2		153.6	412.7	176.2	136.2	192.7	345.8	127.5	245.8
6.78333	257.8	245.2	310.7	285.4	194.8	255.8	220.9	346.5		156.3	430.4	171.1	141.9	195.2	361.3	130.2	249.5
6.8	252.3	240.9	311.7	295.6	193.7	282.8	231.2	341.9		151.8	441.1	169.6	133.5	184.8	353.7	132.3	267.4
6.81667	242	237.2	296.2	268.4	194.1	261.1	253.8	345.2		157.1	428.3	166.3	122.7	201.4	346.7	118.2	249.6
6.83333	234.7	239.8	302.9	281.7	204	275	253.9	340.6		151.4	434.3	170.1	122.2	183.1	330.5	119.6	270.6
6.85	240.1	244.6	299.8	281.1	199.3	260.2	259.3	350.6		153.4	408.7	185.3	120.6	188.5	353.3	117.5	247.9
6.86667	247.5	236.8	269.9	284.3	201.3	264.9	254	342.5		146.1	424.1	183.8	128.1	179.7	347.3	122.2	254
6.88333	248.3	242.9	289.1	260.6	193.1	258.4	258.8	346.9		155	398.7	168.5	128.4	170.7	347.5	126.9	255.8
6.9	244.5	241.1	287.4	260.4	199.9	272.7	277.5	358.7		148.7	404.7	164.9	123.1	178	336.5	123.1	247.2
6.91667	244.1	250.4	332.9	283.7	198.3	283	252.7	362.1		161.9	409.8	173.8	135.5	178.4	337.4	129.5	265.8
6.93333	253.7	242.3	376.7	277.6	192.8	278	257.9	351.9		156.7	391.8	162.9	129.3	171.9	347.4	123.3	245.8
6.95	251.9	233.7	331.7	270.6	191.9	266.6	237.7	350.5		165.8	402	175.4	129.1	183	338.5	123.8	249.5
6.96667	262.1	235.1	341.6	260.9	187.2	266.3	227.3	348.4		154.7	396.7	184.8	148.3	182.9	345.1	121.3	267.4
6.98333	257.7	236.8	301.3	265.7	193.4	268.6	239.8	349.4		155.3	423.1	183.3	145.2	180.2	352.7	123.2	249.6
7	260	243.4	316.2	265.8	191	260.4	242.9	348.4		152.9	430.6	172.7	131.7	179.6	344.9	124.3	270.6
7.01667	256.8	244.7	298.3	279.2	189.5	268.2	234.5	353.2		157.4	432.3	178.8	140.7	168	337.8	125.8	247.9
7.03333	253.6	230	293.6	269.7	198.2	275	229.8	351.2		152	437.4	177.9	132.5	183.4	358.6	128.7	254
7.05	258.5	232.9	308.3	272.7	182	285.1	217.8	345.7		154.1	434.7	177.5	131.2	176.6	345.1	131.3	255.8
7.06667	234.1	239.1	300.8	281.5	193.1	266.7	235	345.6		156.7	443.7	192.5	137.7	174.5	349.5	136.3	261.8
7.08333	246.8	244.3	317.5	282.6	190.9	277.8	228.1	348		156.4	445.6	193.7	136.3	179.3	358.5	126.3	274.6
7.1	251.4	242.4	324.5	268.6	188.2	267.4	237.5	353.5		155.7	441.7	184.1	137.8	179.6	371.5	127.8	248.3
7.11667	260.7	244.8	326.5	269.7	195.4	273.7	232.5	353.4		155.5	452.6	190.4	136.3	178.8	375.9	128	258.3
7.13333	248.6	247.4	300.6	268.3	193.3	289.6	222	350.9		159.3	457	190.8	141.5	176.3	373.8	132	266.4
7.15	258	252.4	330.2	258.7	198.1	270.2	248.7	347.7		162.9	454.2	182.9	145.6	180.4	372.2	127.4	265.7
7.16667	248.9	243	319	287	189.8	280.8	238.2	349		151.4	442	175	148.8	185.2	365.8	135.1	254
7.18333	247.3	238.8	330.6	279	201.4	274.6	243.3	347.8		157.6	436.6	171.8	149.4	178.1	367.2	136.5	249.5
7.2	234.5	240.3	298.5	299.6	198.4	298.1	241.7	339		153.9	426.6	177.1	141.3	180.2	363	130.9	259.8
7.21667	232.1	234.5	297.6	276.3	196.7	286.7	243.5	337.2		160.7	431.8	189.7	146.8	173.2	357.1	128.9	250.3
7.23333	242.9	235.5	282.2	263.4	200	280.9	220.1	333		156.2	419.7	184.4	142.1	176.7	362.8	120	261.8
7.25	243.8	238.9	312.8	274.4	195.8	275.5	233.2	356.1		151.4	410	179.5	125.8	175.7	362.1	123.3	274.6
7.26667	239.1	246.1	351.4	267.3	191.5	279	227.5	353.9		158.2	432	178.1	132.3	182.5	368	122.7	248.3
7.28333	235.5	237.1	325	282	196.4	260.4	222.4	338.3		161.6	435.8	172.5	133.1	183.8	336.4	126.8	258.3
7.3	251.2	238.8	308.7	296.5	198	292.3	231.2	343.4		155.1	435.6	162.8	133.2	190.4	356.4	130.8	266.4
7.31667	234.5	236.8	304.9	269.3	198.6	308.2	222.8	327.7		154.2	429.2	170.7	134.7	182.9	360.5	129.9	265.7
7.33333	241.6	242.2	302.5	272.7	198	276.7	228.9	353.7		151.8	444.3	172	137.6	180.5	376.7	132.6	254
7.35	248.8	234.7	310.7	256.9	201.4	291.3	225	346		153.8	444.2	183.9	136.1	172.7	360.8	134.6	249.5
7.36667	242.4	240.2	320.7	261.3	208.6	288.5	222.9	329.7		156	461.8	202	147.2	181.4	374.6	130.4	259.8
7.38333	256.3	231.4	296.2	284.4	193.9	275.5	215	343		150.3	471.4	183.3	151	179.9	363.1	122.9	250.3
7.4	250.8	237.3	298.7	301.6	205	275	218.8	346.1		160.1	477.2	179	153.8	176.2	363.2	126.4	247.6
7.41667	247.4	229.5	303.9	277.1	205.9	283.8	219.6	352.5		159	455.6	191.9	146.7	181.4	379.6	123.6	241.6
7.43333	251.8	232.6	307.9	264.9	197.2	276.3	224.3	333.7		155.9	460.6	193.6	157.7	182.7	367.3	135.8	260.1
7.45	232.4	245.3	363.2	283	201.2	293.1	231.7	345.9		158.4	454.9	183.6	147.8	177.4	370.6	129	262.8
7.46667	251.2	251.3	325.2	280.9	199.6	298.4	210.1	359.7		151.4	460.2	184.4	142.8	178.8	349.6	133	260.3
7.48333	237.1	228.7	318.9	276	197.6	308.7	218.6	334.1		149.8	441.7	193	143	181.7	373.8	123.3	262.5
7.5	251.6	246.6	322.1	267	196.9	290.7	245.5	351.6		161.4	458.1	188.1	136.7	176	370.6	127.6	270.7
7.51667	247.7	240.3	304.1	264.8	198.8	287.9	227.3	352		156.5	436.3	175.2	136.1	179.4	355.4	130.5	275.8
7.53333	258.6	233.8	302.6	274.1	200.4	281.9	218.1	331.7		160	440.8	175.3	140.7	191.3	367	133.4	283
7.55	241.5	242.6	288.5	290.4	201.1	276.3	218.2	330.5		156.9	436.4	177.9	140	181.4	365.4	132.7	288.8
7.56667	248.5	231.6	302.7	287.3	200	275.8	231.5	344.9		159.2	438.6	180.2	142.7	176.1	364.6	131.9	247.6
7.58333	239.5	241.9	344.5	296.6	195.7	281.6	212.9	337.9		159.9	444.1	174.1	155	174	355.5	128.5	241.6
7.6	221.4	239.5	309.1	281.3	199.4	285.2	230.6	345.3		152.6	464.7	180.5	153.8	176.6	355.2	129.7	260.1
7.61667	223.6	238.1	291.6	273.5	201.8	298.6	230.6	344.7		160.6	471.1	181.6	151.4	177.6	356.1	127.1	262.8
7.63333	246.5	241.6	294.1	286.3	194.2	276.9	228.4	344.2		157.2	463.8	175.1	154.3	179.6	378.7	139.6	260.3
7.65	236.4	241.7	306.8	282	202.2	281.6	225.3	340		162.7	461.9	164.3	156.5	175.7	357.2	133.3	262.5
7.66667	247.9	242.8	345.5	279.8	199.1	291.3	235.1	353.2		157.1	460.6	174	148.5	181.5	370.8	140.8	270.7
7.68333	249.7	241.1	366	282.9	202.1	287.9	227	367		159.9	470.1	187.1	147.7	181.1	366.1	135.4	275.8
7.7	249	250.6	337.8	285.3	209.2	281.8	234.5	345.2		163	458.8	190.8	139.9	182	359.6	135	283
7.71667	246.6	245.9	317.6	278.9	204.9	290	228.6	348.1		158	454.2	176.1	141.9	180.8	388.4	122.1	288.8
7.73333	248.9	245.4	332.9	285.1	201.2	298.8	218.1	352.6		166.9	443.5	179	146.1	184.1	371.9	122.9	283.3
7.75	237.3	236.4	325.5	281.1	205.9	282.5	210.5	347.2		157.9	472.2	179.3	145.9	183.8	369.7	131.3	263.1
7.76667	244.9	239.6	310.1	291.8	215.6	304.2	226.4	349.5		153.1	465.6	187.4	152.1	184.2	363.2	130.8	269.2
7.78333	247.4	233.9	315.5	277.4	211.2	282.9	218.9	331.7		153.9	476.1	212.3	147	182.3	372.2	132.9	265.2
7.8	240.8	248.7	330.2	275.7	207	284.4	242.2	334.9		154.9	449.9	196.1	158.6	175.4	366.8	134.1	269.1
7.81667	260.6	243.9	306.1	271.7	194	305.9	213.8	343.4		148.6	470.6	191.7	159.3	182.1	355.3	136.1	266.1
7.83333	243.1	240.5	306.8	292.4	191.7	293.9	229.4	335.6		151.3	452	186.2	161.3	183	378.8	130.3	271.5
7.85	257.6	243.4	322.8	295	198	294.9	244.1	344.1		155	454.3	189.3	152.1	178.1	363.1	136.3	260.7
7.86667	242.2	237	335.9	294.5	192.5	305.1	248.6	332.6		144.2	459.3	178.4	160.3	191.7	367.6	131.8	281.4
7.88333	227.3	237.9	307.9	287.3	198.5	302.1	239.4	341.6		150.7	486	173.5	159.8	178.6	357.2	132.8	271.3
7.9	231.8	239	300.4	302.3	201.4	294	237.1	338.9		150.9	474.8	185.5	149.6	192	372.5	138.2	267.8
7.91667	236.5	242.5	288.5	288.1	194.9	283.3	255	337.3		149.2	481.5	185.4	147.5	192	365.8	139.9	270.8
7.93333	229.9	251.8	327.5	291.9	205	317.1	238.2	348.4		161.3	463.2	171.3	139.7	184.6	366.6	129.9	275.5
7.95	237.6	242	360.7	296.7	201.5	297.8	249.2	334.5		149.6	465.8	168.6	150.2	184.7	371.5	127.4	278.9
7.96667	239.9	233.9	309.3	290.8	201.6	290.8	262.7	360.2		162.3	503.8	170	148.5	177.5	353.7	127.3	278.1
7.98333	249	235.1	323.4	282.9	215.7	300.6	252	346.7		164.9	474.1	170.5	146.6	185.2	374.7	130.4	295.6
8	239.2	233.4	293.6	280	212.4	306.4	242.4	357.8		153.4	480	178.6	148.2	189.9	369.4	129.1	312
8.01667	243.7	236.3	278.9	291.8	208.3	296.1	230.5	339.9		150.8	483.5	185.4	151.8	192.7	373.4	133.4	309.2
8.03333	239.1	245.6	315.9	299.4	212.2	285.5	236.4	358.9		156.1	471.8	184.3	148	179.7	386	130.7	302.4
8.05	231.7	238.7	312.8	291.9	201.8	281.4	229.4	357.7		160.2	466.1	177.7	168.6	194.4	385.1	137.3	326
8.06667	239.6	234.1	294.8	281.9	205.4	282.4	245.9	355.1		170.2	446.4	175.6	153.8	192.4	370.1	126.1	283.3
8.08333	234.7	242.8	329	282.2	196.8	296.2	240.7	347.3		150.9	475.8	175.4	150.4	193.9	374.3	130.8	263.1
8.1	246.4	237.4	353.1	284.2	203.6	290.8	239.6	344.3		163.4	453.9	173.1	142.2	191.1	391	138.4	269.2
8.11667	253	245.1	323.7	267.8	199.7	288.9	249.8	352.7		152.1	464.4	182	150.2	196.3	367.2	138.8	265.2
8.13333	240.8	239.8	326	296.4	204.6	306.6	241.2	349.8		164.4	459.1	198	138	185.8	377.7	133	269.1
8.15	246.4	244.8	311.6	293.1	204.9	296.5	247.2	351.6		159.9	458.6	201.1	137.2	194.6	368.1	130.3	266.1
8.16667	243	241.2	297.4	330.4	209.4	295.2	243.1	352.4		162	479.2	194.2	144.9	189.5	377.6	134.7	271.5
8.18333	251.4	238.3	287	291.2	201.4	285.5	248.1	352.9		152	471.9	190.2	145.7	187.9	360.5	133.1	260.7
8.2	236	240.7	285.5	295.4	204.3	315.9	249.3	356.7		161.5	448.5	186.1	154.3	196.1	378.8	133.9	281.4
8.21667	230.2	238.3	313.4	293.8	201.2	294.2	248	344		159	468.6	175.6	161.8	182.9	382.9	136.2	271.3
8.23333	238	239.3	286.8	287.1	197.3	284	256.2	350.7		159	472	179.2	163.8	195.3	372.8	138.8	267.8
8.25	228.9	240.4	302.6	302.5	208.1	277.7	248.9	360.2		162.7	478.3	182.5	161.2	186.4	365.5	140.9	270.8
8.26667	229.6	240.6	350.7	300.5	206.5	271.6	245.9	351.8		162.2	486.1	173.5	156.6	187.5	380.6	134.1	275.5
8.28333	244.7	234.7	344.8	307	207.8	259	254	341.9		153	498.4	178.4	159.4	186.7	382.7	130.6	278.9
8.3	235.5	235.9	312	302.5	207.2	260.2	246.2	348.2		161.6	497.3	187.8	141.3	184.8	376	134.1	278.1
8.31667	243.8	243.5	309.4	289.5	196.6	274.9	259.7	350.8		161.1	492.1	182.6	156.6	181.3	388.5	129.3	295.6
8.33333	244.9	241.7	297.9	277.6	201.7	261.5	244	335.8		168.8	480.7	164.2	153.8	192.6	403.3	134.2	312
8.35	252.7	239.3	329.5	273	206.7	276.5	247.1	341.5		153.4	499.4	173.8	153.3	184.3	387.5	141.2	309.2
8.36667	258.5	240.5	322.4	270	205.9	264	245	345.6		157.3	479.9	171.9	161.6	197.1	380.6	142.3	302.4
8.38333	241.3	238	311.8	281.9	201.7	233.7	243.2	344.4		158.3	483.2	187.7	148.7	198.5	392	138	326
8.4	245	241.8	319.9	287.6	199.2	239.2	247.2	347		154.5	475	180.4	141	187.3	376.5	137.3	315.3
8.41667	252.3	242.2	357.8	289	197.5	272.3	241.6	341.1		153	469.5	183.9	154.5	190.4	373.7	135.8	304.4
8.43333	240.6	239.9	359.7	301.6	209.6	255.5	252.4	339.4		161.1	468.8	184.9	144.7	195.9	376.3	133.4	310
8.45	234.2	241.7	356.3	299.6	200.2	270.7	236.7	344.5		162.8	482.6	194.1	150.8	192.3	378.3	139.8	301.5
8.46667	227	237.6	342.5	319.9	201.9	272.9	237	370.7		172.4	468	193.8	156.7	205.3	373.6	142.2	293.6
8.48333	237.1	237.9	325	303.1	207	299.1	243.7	347.8		159.1	485	187.1	144.2	190.9	364.6	138	300.4
8.5	237.8	235.6	310.5	321	206.2	301.5	232.1	350.3		155.9	472.1	190	147.9	190.7	367.9	133.7	310.7
8.51667	245.3	242.9	291.9	300.9	197.1	330.5	237.2	347.2		159.6	477	189.4	150.8	201.3	383.3	136.4	308.6
8.53333	254.8	242.6	299.8	290.2	204.3	303.8	247.8	342.4		161.9	489.4	183.3	154.9	186.6	386.9	133.8	307.6
8.55	238.1	234.1	306.3	287.7	196.6	300.6	233.9	344.2		160.7	477.3	178.5	145.1	189.8	376.2	131.9	304.7
8.56667	246.6	239.4	310.2	288.1	203.6	303.8	223.3	340.2		164.2	474.1	198.4	146	197.1	388.2	139.2	314.9
8.58333	247.2	242.1	355.9	296.6	204.1	305.5	236.5	341.1		164	492.2	187.1	148.4	201.9	392.2	137	323.1
8.6	235.1	238.5	332.1	299.5	209.6	297.6	250	332.5		158.6	493.6	176.4	142.2	204.8	384.2	138.9	314.4
8.61667	249	235.9	322.1	286.9	204.4	305.7	237.3	338.1		160.7	515.5	173.7	159.9	200.2	382	135.7	298.5
8.63333	237.6	238.7	311.1	299.9	205.3	303.4	226	354.7		163.7	528.6	184.8	160.3	202.6	390.6	130.6	314
8.65	241.5	234.3	301.3	272	194.7	305	233.9	346.4		165.5	521.4	186	164.3	204	383.5	138.4	325.5
8.66667	237.1	234.4	286.7	291.8	215.4	298.6	248.1	345.8		162.8	478.4	173.3	157.7	206.1	385.6	143.1	325.8
8.68333	237.1	239.6	291.8	301.3	201.6	297.5	247.6	354.1		161.7	485.6	180.2	156.9	201.6	394.2	140.1	312.3
8.7	239.4	239.7	313.6	331.4	200.8	292.9	229.5	337.2		164.2	448.9	176.4	160.3	201.9	376.3	142.7	318.4
8.71667	235.8	238.8	296.7	318.7	204.1	317.7	236.2	342.7		165.8	465.1	175.7	158.9	203.1	388.7	135.9	314.8
8.73333	241.1	231.5	290.4	311.8	204.6	306.6	238.5	341.3		166	476.4	188.3	155.7	199.5	397.9	134.3	315.3
8.75	258.2	244.2	314.7	314.5	213.1	294.1	231.7	350.3		163.7	467.6	190.6	146.5	206	372.4	133.7	304.4
8.76667	251.1	237.3	316.7	292.7	209.3	273	231.9	349.4		154.3	466.9	182.8	153.8	197.3	386.1	139.1	310
8.78333	260	236.4	341.5	313.8	195	299.8	226	339.6		167.5	465.9	181.4	154.7	209.6	386.9	140	301.5
8.8	258.8	243.8	348	314.1	209.8	289.7	228.5	351.2		165.7	458.5	182.8	157.7	202.9	392.6	145.3	293.6
8.81667	257.7	232.3	375.5	335.2	199.7	275.5	230.5	344.7		163.9	457.9	187.7	162.7	192.3	403.6	139.7	300.4
8.83333	251.6	247	329.8	294.5	192.9	260.5	249.6	346.1		161.3	485.7	197.7	169	204.5	400.1	139.3	310.7
8.85	249.9	231.2	322.7	292.4	198.2	262.7	236.6	346.6		169.8	473.8	194.9	203.4	204.6	387	136.2	308.6
8.86667	241.4	239.5	307.2	282.7	192.3	283.5	228	348.6		174	479.4	184.5	265.1	196.3	406.8	140.5	307.6
8.88333	230.3	237	310	290.6	211.9	292.5	235.1	345.3		158.3	498.8	186	242.7	202.1	397.5	146.3	304.7
8.9	246.9	246.2	310.7	304.4	202.6	289.4	228.7	356.2		153.3	499.2	177.8	219.1	198.7	391.8	148.3	314.9
8.91667	234.3	246.4	309.4	303.2	199.4	266.1	243.1	355.1		158.3	495.9	174.2	200.8	198.8	388	148	323.1
8.93333	237.7	231.5	344.6	289.3	199.9	285.4	234.9	358.6		160	506	197.7	192.8	204	390	144.4	314.4
8.95	238.1	233.8	331.6	318.2	194.1	279.4	233.1	371.1		164.2	517.9	186.7	174.2	215.9	400.8	139.1	298.5
8.96667	239.8	238.7	324.3	318.3	202.3	269	221.3	353.4		167.8	506.9	190.8	165.3	202.5	386.4	146.7	314
8.98333	236.7	239.7	295.3	322.4	201.1	279.5	236.7	342.9		165.4	505.1	181.3	166.2	206.5	398.9	144.9	325.5
9	248.1	241.7	308.9	314	196	297.8	231	354.1		165.2	490.5	175.9	156.3	207.7	393.8	141.1	325.8
9.01667	243.4	239.8	320.7	326.8	200	290.3	228.9	356.6		167.6	503.9	171.2	156.3	205.8	402.4	141.4	312.3
9.03333	276	235.5	332.2	311.9	194.9	279.5	243.4	351.6		179.4	512.7	182.6	156.9	206.9	382.1	141.9	318.4
9.05	262.9	236.4	320.2	299.1	205.1	280.4	239.7	348.6		165.4	506	175.4	162.4	201.7	389.5	141.5	314.8
9.06667	250.3	241.3	346.7	308.1	201.8	290	239	357.5		166.3	496.2	178.9	157.6	210.5	396.8	145.2	311.3
9.08333	250.2	239.9	333.3	317.7	196.7	291.9	247.8	336.3		166.4	513.5	177.1	161.9	207.5	403.9	155.1	305.1
9.1	245.8	237.1	330.1	309.7	189	290.4	246.9	343.9		168.4	515.2	198.1	150.9	202.7	387.2	149.8	310.5
9.11667	247.5	240.9	361.8	311.2	190.7	279.3	246.3	336.1		166.5	508.5	182.2	166.3	213.3	395.4	144.1	297.6
9.13333	249.6	237.1	381.1	290.4	205.3	281.1	259.9	350.3		175.7	518.4	175.4	154.9	196.5	390.6	136.8	305.9
9.15	250.3	235.1	345.7	286.8	199.4	278.7	239.5	349.3		168.9	520.4	179.9	154.3	208	389.3	151.5	306.8
9.16667	249.3	242.1	340.4	281.8	194.4	296.6	245.6	356		169.8	519.7	191.1	162.5	199.9	384.7	140.7	297.2
9.18333	253	250.9	312.3	283	198.4	290.6	251.3	360.4		162.7	505.4	191.5	156	205.6	395.6	140.6	302.6
9.2	253.9	240.5	343.4	293	194.4	288.4	236.7	348.8		159.9	542.9	203.1	156.5	203.7	389.9	142.7	304.1
9.21667	249.1	231.9	322.9	316	200.9	307.5	230.6	357.5		168.1	515.1	204.1	155.5	205.5	383.2	139.2	301.4
9.23333	260.4	236.4	340.2	302.7	197.9	296.5	246.8	354.1		165.5	489.6	202.4	153.6	208.1	396	143.8	318.1
9.25	240.4	235.9	320.5	337.2	200.2	289.7	235.7	361.3		154.3	492.7	191.4	153.7	214.4	396	133.4	302.6
9.26667	239.7	244.2	330	306.1	202.8	289.9	238.7	359.6		157.2	491.6	193.4	153.2	209.8	393.5	137	323.2
9.28333	259.7	241.7	323.5	299	194.2	301	237.4	358.3		157.1	482.9	195.9	156.5	215.4	390.1	142.5	313
9.3	248.6	247	309.4	322.2	205	321.8	234.6	350.6		163.9	492.6	186.9	152.5	206.8	390.2	152.3	309
9.31667	236.3	244.8	292.5	311.6	195.7	292	230.7	351.2		160.2	473.4	189.4	155.4	211.7	388.7	147.6	310.9
9.33333	247.6	238	306.6	319.8	197	298	235.3	354.1		162.9	490.2	196.8	158	221.9	400.5	145.8	301.5
9.35	242.2	243.1	346.4	326.1	196.9	302.7	234.9	351.1		155.9	483.8	199.5	153.5	208.5	392.9	147.4	301.8
9.36667	248.4	238.6	370.7	295.5	200.7	296.4	229.9	356.2		166	483.1	197.2	152.2	209.6	409.9	141.7	308.3
9.38333	254	236.6	377.9	319.2	197.5	291.5	231.1	347.3		165.6	496.8	179.1	150.6	221.6	381.5	144.8	295.1
9.4	260.9	242.7	337.1	320.1	195.7	309.7	242.4	375.3		165.1	496.5	173.7	153.5	212.7	391.2	145.2	315.3
9.41667	263.5	235.7	346.4	308.1	193.5	302.8	236.9	364.6		172.7	505.8	176.3	150.3	218.7	392.8	142.1	304.8
9.43333	263.2	239.3	324.3	300.1	187.4	287.7	226.5	345.5		161.3	497	177.2	179.7	215.1	389.4	152.2	314.1
9.45	263	237.1	315.2	305.6	195.7	299.8	228.2	341.5		162.1	505.7	185.1	152.1	213.2	415.4	144.2	309.3
9.46667	263.5	232.3	311.7	309	196.4	302.7	223.2	352.5		168.4	506.4	188.9	147.9	215.6	395.7	146.6	326.7
9.48333	248.4	231.7	318.6	327.3	200.8	296.7	230.7	351.3		166.5	498.6	188.4	153.9	207.9	402.7	158.2	321.3
9.5	254.3	235.6	349.3	319.8	191.5	294.1	232.5	349.8		163.1	527.5	178.2	165.6	217.3	407.3	151.9	308.8
9.51667	245.6	234.5	369	321	186.2	300.8	225.9	340.6		172.5	512.2	189.6	160.4	226	408.8	150.4	313.9
9.53333	249.5	242.6	362.2	310.9	188.6	291.8	220.9	361		174.9	509.5	195.6	162.8	222.2	424.2	152.8	307.8
9.55	267.5	236.7	332	326.6	200.5	293.6	231.2	352.8		170.4	520.6	189.1	158.1	220.5	429.4	144.1	311.8
9.56667	268.1	243.2	334.2	295.4	200.3	291	253.8	346.5		165.3	516.8	194	159.4	217.3	419.1	141.1	300
9.58333	251.8	248.6	343.5	334.7	202.5	300.6	253.9	352.3		162.9	510.4	182.8	155.4	214.9	426	143.1	326.3
9.6	249.1	241.8	318.5	320.4	197.3	301.4	259.3	361.3		166	519.2	194.2	151.1	215.9	419.2	144	314.7
9.61667	248.5	231.6	335	317.9	205	291.8	254	341.4		160.8	516.2	181.1	150	239.4	419.6	144.1	308.7
9.63333	240.5	241.8	333.3	315.1	196.4	309.1	258.8	350.2		166.1	521.1	181.9	150.7	215.7	423.7	143.9	315.5
9.65	246.2	242	353.4	313.7	198	304.6	277.5	360.8		157.2	513.6	191.4	157.6	213.7	416.3	145.3	316.7
9.66667	239.2	240.5	309.8	298.3	198.8	311.3	252.7	362.4		173.7	525.4	196.3	154	225.4	395.5	142.8	312.8
9.68333	235.9	243.3	328.7	320	181.4	298.2	257.9	360.1		161.8	532.8	181	157	214.4	409.9	149.1	318.2
9.7	253.6	242.5	356.2	328.2	192.3	299.1	237.7	355.5		166.7	522.3	188	165.8	208.8	406.3	148.8	314.5
9.71667	251.5	241.8	330.7	314.4	188.5	297.4	227.3	356.3		165.8	504.7	188.7	162.9	207.5	421.4	151.3	316.3
9.73333	252.7	237.5	321.9	305	188.4	290.3	239.8	353.4		156.6	495.9	182	164.7	225.9	412.6	150.9	330.5
9.75	258.2	242.1	310.4	316	188	304.5	242.9	342.3		160.9	500	191.3	165.6	220.1	428	139.9	317.5
9.76667	257.1	232.9	312.3	310.4	184.4	306.8	234.5	342.4		166.3	497	188.4	162.5	219.7	414.8	149	311.8
9.78333	245	241.8	301.6	313.3	195.6	301.6	229.8	359.6		168.5	500.2	186.6	152.1	227.4	422	143.1	310.1
9.8	257.7	239.9	325.3	300.2	202.8	304.6	217.8	346.8		163.6	519.6	177.4	164.2	230.4	417.2	151.5	310.4
9.81667	254.7	240.4	365.2	328.8	185.7	312.3	235	358.8		161.7	512.1	181.4	150.8	210.2	410.8	146.5	303.2
9.83333	235.9	241.1	323.2	327.4	194.3	306.5	228.1	349.1		175.9	499.7	193.4	160.1	220.7	422.2	152.6	297.9
9.85	239.4	236.3	327.2	325.1	193.6	307.7	237.5	351.6		165.3	492.5	194.6	160.5	219.5	406.5	144.4	301.8
9.86667	250.9	235.4	314.6	324.2	192.8	304.4	232.5	341		162.4	505.7	188.3	153.9	206.7	403.6	150.6	301.8
9.88333	248.5	240.7	334.2	316.2	188.9	314.1	222	346.7		173.7	509.3	194.8	155.8	226.2	407.3	150	310.8
9.9	253.1	242	359.4	307.2	190.6	310.7	248.7	351.9		167.6	499.7	187.9	163.1	228	408.5	157.7	316.4
9.91667	249.5	239.3	321.9	340.2	196.3	319	238.2	356.2		169.1	496.5	182.8	164.6	225.7	403.8	152.9	316.1
9.93333	258.9	238.7	322.4	312.1	187.5	309.4	243.3	351.6		173.2	493.4	195.1	175.9	215.2	425.9	155.7	333.1
9.95	268.2	245.3	342.6	315	182.6	289.4	241.7	366.9		170	515.3	193.8	171.3	228.8	432.5	150.7	320.3
9.96667	259.2	243.2	358.7	329.1	177	316.9	243.5	367.3		171.5	516.5	200.9	168.2	229	402.4	146.4	309
9.98333	255.8	240.2	351.7	330	187.9	322.9	220.1	364.2		174.5	512.1	191.9	157.8	224.2	422.9	147	312.3
10	252.7	236.2	330.7	308	188.3	317.5	233.2	357.5		171.3	525.5	185.8	159.1	216.2	407.8	143.1	328.5
10.0167	238.3	241.8	327.3	320.8	193.6	310.3	227.5	360.3		165.1	525.8	195.7	154.9	227.7	393.8	142	321.8
10.0333	242.4	244.5	317.3	323.8	190.8	306.6	222.4	366.5		180.4	520.7	183.1	154.1	229.3	400.8	153.1	307.3
10.05	258.1	239.4	331.3	322.2	195	316.1	231.2	361.1		166.5	518.4	176.8	155.4	240.4	400.5	150.8	304.3
10.0667	253.3	245.3	311.8	339.5	184.7	334.5	222.8	362.4		161.9	517	189.2	160.8	226.4	407.6	155.1	311.3
10.0833	258.7	241.3	309.9	345.8	198.2	308.6	228.9	355.8		163.7	485.9	193.6	165.9	244.5	409.8	157.2	309.4
10.1	262.4	242.9	351.1	322.8	191.2	319.4	225	364.5		169.4	495.9	188.8	173.1	225.7	422.2	160.6	335.5
10.1167	259.5	237.6	340.1	356.7	192.3	313.1	222.9	373.2		167.3	486.6	178.4	175.3	236.9	415.1	152.5	308.7
10.1333	268.5	242.9	342.5	327.5	195.3	304.9	215	374.2		163.9	497.3	176.1	171.1	238	405.5	147.9	316.1
10.15	242.7	240.4	358.8	327.6	187	318.5	218.8	342		173.4	483.9	178.8	182	234.1	388.4	146.2	311.4
10.1667	241.6	242.5	326.3	319	186.7	302.6	219.6	344.4		167.8	485.5	186.2	164.4	228.3	435.5	146.3	330.6
10.1833	241.7	237.9	322.1	313.7	195	310.7	224.3	349.8		181	496.3	194.9	161.7	226.5	412.8	151.5	322.4
10.2	238.6	238.7	326.1	328.9	185	303.4	231.7	349.7		169.1	504.4	200.6	162	229.4	405	149	320
10.2167	244.7	238	347	333.3	193.7	317.1	210.1	364.2		174.6	500.9	197.9	156.5	226.7	417.7	153.1	337.8
10.2333	243.1	249.7	335.5	308	187.6	315.6	218.6	356.2		163.8	521.3	201.9	156.8	235.1	410.4	155.2	326.8
10.25	247.4	246	324.8	313.1	189.9	308.8	245.5	355.7		177.1	510.1	191.6	163.8	216.3	400.5	144.7	305.9
10.2667	259.8	233.8	315.1	324.8	193.8	319	227.3	339.1		162.1	503.9	200.1	156.4	227.5	414.6	147.7	316.3
10.2833	261.2	237.9	306.6	316.4	188	315	218.1	349.1		168	516.8	193.7	166.1	224.2	416.9	158.3	316.3
10.3	253	244.1	306	337.1	192.9	308.2	218.2	347.9		166.7	539.4	198	159.2	226	402	153.7	306
10.3167	251.4	244.4	340.8	336.3	197.6	324.3	231.5	344.7		172.6	525	205.8	155.3	227	416.7	152	319.2
10.3333	242.1	238.6	331.6	329.6	194.7	329.9	212.9	347.9		163.8	526.7	192.3	163.6	236.6	414.2	156.4	312.2
10.35	267.9	237.3	354	334.2	196.8	313.7	230.6	359.7		179.8	549.9	186.2	174.2	219.7	412.1	156.5	308.7
10.3667	247.1	236.7	321.7	331.1	198.4	307.6	230.6	361.3		173.5	530.8	189.7	171.4	237.3	429.1	157	313.6
10.3833	247.1	242.7	315.5	334.6	194.9	324.1	228.4	359.4		167.5	524.6	183.2	163.1	239	398.1	155.4	319.8
10.4	236.3	238.2	318.8	336.1	194.2	314.8	225.3	361.3		178.1	515.7	177.2	161.7	228	418.3	158.9	318.8
10.4167	244.1	237.6	317.9	322.3	200.5	327	235.1	346.7		167.4	528.7	176.9	157.6	227.7	420.2	153	321.9
10.4333	250.7	233.1	307	309.6	195.1	308.6	227	351.2		168.8	532.5	183.9	157.5	226.9	425.5	151.1	319.8
10.45	253.1	240.8	302.8	315	189.7	314.7	234.5	348.1		161	509.1	192.2	147.1	229.5	423.8	149.1	319.9
10.4667	247.7	243.9	307.8	302.3	187.4	310.1	228.6	366		183.2	500.9	185.2	151.4	237	412.8	165	322.6
10.4833	247.5	236.7	327.1	313.2	185.6	325.6	218.1	366.1		171.6	512	185.8	157.9	222.7	426	151.8	321.5
10.5	257.2	234	366.8	304	190.2	312.9	210.5	372.2		174.3	531.4	195.7	168.2	223.7	401.8	158.4	317
10.5167	239.3	242.2	385.9	326.7	197.1	311.4	226.4	374.1		163.7	522.4	192.2	162.2	224.2	408.8	155.6	307
10.5333	257.4	240.8	363.3	323	188.9	307.4	218.9	357.3		181.5	501.9	187.1	168.8	238.7	395.1	154.1	315.1
10.55	240.5	251.9	360.3	332	194.5	302.9	242.2	360.6		169.9	529.7	193.7	164.6	249.9	410.8	162.4	313.1
10.5667	239.8	246.1	359.8	328.8	183.3	307.3	213.8	346.7		163.2	518.4	196	161.3	233.6	411.6	164.7	310.4
10.5833	254.4	238.9	367.7	341.6	193.2	311.2	229.4	340		167.9	507.1	184.8	163.9	237.3	421	162.2	315.5
10.6	248.1	240.3	350.1	332.1	183.2	310.2	242.6	348.8		175.6	506.7	184.9	166.1	241.6	414.3	151.4	316.1
10.6167	247.4	234.7	338	331.4	188.4	310.4	244.1	348.7		163.1	512.4	194.2	165.7	231	418	150.1	341.5
10.6333	253.3	236.2	326.7	322.3	200.7	326.7	248.6	339.1		170.1	512.2	204.6	165.3	225.7	423.7	155.4	317.9
10.65	251.9	240	328.9	348.4	193.5	327.9	239.4	351.2		180.4	515.6	196	162.4	228	423.9	158.7	326.1
10.6667	261.4	236.5	314.3	328.7	178.6	322.5	237.1	357.6		174.9	510.7	192.6	156.1	226.1	418.9	158.8	327.1
10.6833	252.7	236.7	294.3	306	192.9	313.5	255	344		179.1	509.1	191.7	152.7	236.7	415.9	158.7	320.6
10.7	248.8	242.9	309.3	324.9	179	323.4	238.2	344.3		174.1	517.2	194.3	161.5	237.1	415.9	157.3	323
10.7167	254.4	247.9	339.3	318.9	180.8	314	249.2	344.3		168	520.9	187.3	165.1	239.2	419.1	160.1	326.1
10.7333	250.7	235	384.2	338.5	190.6	300.7	262.7	345.8		171.2	528.8	183.7	151.4	236.7	401.4	152.8	325.4
10.75	246.4	239.5	416.3	326.2	193.5	309.1	252	360.6		188.3	544.2	180.1	174.6	234.4	410.2	157.6	321.5
10.7667	249.6	234.8	380.7	336.9	194.9	292	242.4	349.8		165.5	535.8	168.7	185.8	247	410.7	156.9	334.7
10.7833	246	248.7	353.5	353.6	190	283.9	230.5	361.4		179.6	512.9	186.1	171.9	240.1	414.2	155.3	320.3
10.8	268.3	234.4	380.2	323	193.9	285.4	236.4	349.6		171.9	535.3	184.9	170.5	242.9	412.6	157.4	318.2
10.8167	260.1	250.9	344.6	335.2	193.8	281.9	229.4	344.6		178.4	522.9	183.3	167.3	236.3	424.8	161.2	319.1
10.8333	255.5	241.2	338.1	325.3	195.3	268.1	245.9	351.1		164.8	515	187.1	164.7	244.7	417.3	160.9	322.4
10.85	251.8	240.9	347	356.9	193	276.4	240.7	362.1		167.8	521.3	185.4	160.2	241.3	405.2	153.8	331.3
10.8667	255.3	233.2	352.8	354.9	191.1	287	239.6	351.3		177.1	526.6	200.2	158.3	243.9	414.5	156.9	318.1
10.8833	253.8	238	377.4	342	199.1	293.6	249.8	362.3		178.7	511.7	194.4	158.1	241.1	397.5	156.6	321.1
10.9	240.3	239.4	367	334.4	197.5	304	241.2	367.2		167.9	530.8	194.8	160	236.9	417.5	155	325.3
10.9167	238.9	241.5	408.4	314.2	191.2	304.7	247.2	365.3		180.1	505.5	193.9	162.4	248	411.9	158.8	332.2
10.9333	245.2	234.2	360.5	336.8	200.2	310.4	243.1	356.8		180.6	496.1	202.9	167	242	411.5	151.8	337.6
10.95	253	230.8	354	323	186	327.9	248.1	369		174.2	494.5	187.1	161.3	240.9	412.6	152.8	318.5
10.9667	243.1	243.4	325.6	328.5	186.7	325.1	249.3	360.7		169.1	502.6	184.1	165.5	248.2	399.4	158	319.1
10.9833	251.3	244.5	341.5	335.4	189.5	322	248	369.6		170.4	505.6	184.2	166.6	253.5	406.7	153	320.4
11	257.5	235.8	368	321.7	183.3	339.4	256.2	373.6		171.3	475.4	187	175.8	242.6	403.5	157.4	330.4
11.0167	262.8	244.6	336.6	356.9	189	311.1	248.9	356.8		167.4	485.1	187.8	173	259.1	418.9	165.9	322
11.0333	257.9	234.9	364.8	330.7	192.6	314	245.9	343.9		167.7	496.8	190.1	174.1	251.1	398.9	158.8	311.5
11.05	259.8	236.5	381.2	334.3	198	318.6	254	355.4		173	501.5	184.9	167	247.9	388.5	157.8	323.3
11.0667	251.6	237.6	353.6	332.6	186.4	331.9	246.2	354.2		175.8	517.9	181.3	167.6	242.1	407.5	157.5	320.9
11.0833	255.7	242.5	354.8	341.5	188.5	323.2	259.7	363.4		173	516.4	180.5	158.8	231.3	409.8	152.2	324.1
11.1	254.3	237.7	336.2	344.8	203.4	302	244	354.6		176.7	515.3	198.9	166.3	246.3	412	160.4	325.2
11.1167	262	231	329.9	351.6	196.6	300.2	247.1	352.8		176.9	531.5	195.4	162.7	266.1	401.4	156.7	323.3
11.1333	245.8	239.2	354	338	199.2	301.6	245	349.5		174.1	534.9	191.7	159.2	258.4	402.3	152.8	337.1
11.15	258	234.2	377.5	319.7	198.5	282.3	243.2	351.6		174.5	536	191.9	165.2	246.3	413.1	153.5	313.3
11.1667	260.5	228.9	404.3	323.5	196.8	295.9	247.2	350.3		165.2	539.8	186.1	171.9	258.5	414.4	158.6	324.8
11.1833	251.9	237.7	350	333.3	198.7	298.6	241.6	350.7		171.2	543.5	195.4	168.5	253.4	401.3	154.5	331.4
11.2	247.3	244.8	351.1	364.7	189.8	295.7	252.4	353.5		170.4	541.7	191.1	166.8	238.5	401.4	155.3	337.3
11.2167	247.8	234.8	331.2	333.2	193.8	293.4	236.7	364		181.3	529	196.6	170.7	244	395.8	154.4	312.8
11.2333	246.3	229.9	336	346.8	185.9	313.1	237	358.5		178.3	544.8	202	167.1	254.6	403.9	158.3	318.8
11.25	238.7	224.8	342.5	351.5	184.3	308.6	243.7	356.1		172.7	524.1	196	176.7	244.3	417	167	332.1
11.2667	261.9	246.5	339.6	378.2	211.7	319.1	232.1	344.6		183.1	521.8	188.1	172.2	250.2	394.3	166.3	318.9
11.2833	260.2	237.9	342.1	338.1	191.8	324.3	237.2	355.5		170.6	508.4	194	172	250.2	414.1	167.8	324.9
11.3	257.7	241	354	347.6	185.3	324	247.8	358.6		176.3	541	189	167.8	273	407.7	166.3	319.3
11.3167	260.8	236.4	346.8	334.9	196	337.4	233.9	372.6		173.4	511.6	197.4	159.7	251.8	415.8	156.7	320.6
11.3333	262.5	236.9	354.6	351.1	188.2	328.4	223.3	368.5		175.5	512.9	195.8	168.2	253.1	416.6	158.2	336.2
11.35	272.2	238.8	336.4	346.7	196	326.8	236.5	356		176.7	522.7	188.5	175.3	252.3	410.6	159.1	330
11.3667	249.1	237.6	330.4	344.5	186.2	301.9	250	373.1		175.4	505.2	185.4	170.6	251.6	418.3	161.7	327.8
11.3833	242.1	231.5	323.1	333.5	193	323.5	237.3	355.7		170.7	495	186.8	187.8	248.6	414.9	166.4	335.5
11.4	240.3	228.1	342.2	343	196.6	330.4	226	373.3		166.5	514.5	194.9	189.6	253.1	413.1	162.2	334
11.4167	235.3	248.4	340.5	333.4	188.8	310.8	233.9	359.4		173.1	510.4	181.4	185	243.8	410.1	156.2	314
11.4333	239.8	237.4	327.9	357.6	190.6	314.3	248.1	357.6		166.1	508.1	195.3	170.6	255.1	399.5	151.1	325
11.45	255.5	244.2	327	342.1	183.7	308	247.6	359		163.2	511.7	188.7	174.7	269.5	402.6	157.1	319.7
11.4667	248.9	233.6	330.2	346.1	189.6	310.6	229.5	353.5		154.6	535.9	184.4	172.4	257.8	410.5	152.2	328
11.4833	256.7	243.4	344.4	349.8	190.2	326.4	236.2	368.8		162.6	507.6	185.3	175.6	247.9	423.9	168.3	316.9
11.5	249	236.9	377.6	336.3	190.9	324.9	238.5	378.6		164.1	499.9	186.7	173.2	250.8	402.7	168.6	334.5
11.5167	251.7	230.5	392	348.1	184.9	311.3	231.7	362.9		177	527.4	195.9	165.6	258.4	418.5	167.9	320.3
11.5333	238.7	236.9	387.6	348.5	188.4	313.8	231.9	369.2		168	525.6	199.7	170.8	258.8	414.7	162.8	326.9
11.55	246.2	232.5	367.1	340	185.5	310.2	226	361.3		175.5	515.8	195.7	173.1	251.7	422.1	159.7	337.2
11.5667	256.5	232.3	354.1	355.5	191	327.7	228.5	362.7		168.6	530.6	193.5	174.4	244.4	417.3	160.5	325.5
11.5833	249.2	233.4	353.3	333.5	187.8	310.9	230.5	369.4		174.7	530.8	193	177.1	267.7	422	161.6	331.1
11.6	268.6	235.7	368.9	336.6	191.3	315.1	249.6	373		182.2	544.8	203.8	180.4	265.6	423.8	155.2	336.6
11.6167	261.8	232.3	339.7	357.6	199	305.9	236.6	368.5		180	553.2	193.9	163.8	255.9	426.6	157.7	323.4
11.6333	252.8	236.1	348	351.2	209.2	314.8	228	366.8		181.1	513.1	198.4	172.4	252.4	407.8	157.3	335.7
11.65	262.3	233.8	354	340.4	193	297.8	235.1	370.3		172.2	544.7	185.8	176.3	245.8	412.1	158.3	325.9
11.6667	254.2	235.2	369.9	333.7	194.2	304.4	228.7	359.5		171.5	507	193.7	166	267.2	405.4	157.1	323.9
11.6833	240.4	234.3	356.1	352.1	210.1	310.2	243.1	354.7		171	521.9	190.5	170.3	260.3	424.3	158.2	345.7
11.7	234.5	236.2	343.7	321.3	189	290.8	234.9	366.5		169.6	511.5	177.5	165.4	257	409.6	160.9	319.6
11.7167	248.8	246.8	344.9	333.9	195.9	284.8	233.1	347		172.5	521.6	181.5	166.4	262	393.5	164.1	326.1
11.7333	239.5	234.2	345.4	345.5	188.7	289	221.3	367.7		170.8	514.8	188.4	167.8	260.9	391	153.4	326.9
11.75	239.8	237.5	347.7	363.6	194.6	284.1	236.7	360.5		172.4	498	198.8	173	268.6	395.9	159.1	337.1
11.7667	253.6	225.3	341.6	346.2	189	304.2	231	355.8		172.7	502.7	186.8	174.2	245.6	402.7	154.9	332.7
11.7833	255.1	238.1	350.6	338.9	188	290.5	228.9	347.1		177.6	506.6	199	175.8	266.8	404	157	329.7
11.8	255.9	239.3	348.4	323	194.3	278.5	243.4	360.3		162.8	503.6	191.9	182.1	261.2	399.6	157.4	329.9
11.8167	255.9	231.7	342.7	340.2	195.3	296.1	239.7	357		157.1	515.5	204.6	176.5	277.2	412.3	158.5	322.5
11.8333	268.7	231.8	348.2	340.3	201	288.1	239	354.2		178.6	514.7	204.4	169.2	260.4	411.7	161.7	327.6
11.85	265.6	228	332.4	341.9	187.6	294	247.8	350.4		161.4	537.1	200	179.5	277.7	419.5	154.7	328.2
11.8667	258.5	234.8	356.1	338.9	190.2	286.6	246.9	351.5		169.7	512.2	192.7	165.1	261.4	409.8	163.2	326.7
11.8833	256.6	236	371.1	329.7	188.6	287.8	246.3	341.8		179.8	510.1	195.7	167.8	265.7	418.7	163.2	325.7
11.9	253.6	234.5	343.4	332	184.3	303.8	259.9	344.3		174.5	521.1	193.6	165.8	259	393.8	161.1	331.3
11.9167	257.4	234.8	335.6	336.3	195.5	309.4	239.5	353.3		181.8	539	209.4	166	259	410.7	164.1	317.8
11.9333	246.5	234.8	338.5	336.3	185.7	307	245.6	356.8		179.8	532.7	189.8	178.3	264.5	399.2	160	314.8
11.95	240.2	238.5	344.3	345.8	185.5	323.5	251.3	363.5		168.9	525.1	191.2	166.2	278	402	167.8	323.2
11.9667	250.2	241.2	325.1	346.2	191.2	324.5	236.7	379.7		183.1	536.4	183.7	182.2	266.1	400.7	162	328.9
11.9833	256	228.5	332.4	377.5	184.4	332.2	230.6	370.4		175.6	517.6	192.3	172.5	255.6	413	156	324
12	246.5	246.8	338.9	382.9	185.2	321.9	246.8	362.9		171.4	515.8	187.6	180.7	252.8	420	158.9	320.9
12.0167	248.6	233.9	349.6	376.7	191	322.6	235.7	366		170.2	496.7	196.4	177.8	261.6	396.4	158.9	331.9
12.0333	253.9	234.5	395.8	358.3	192.3	328.7	238.7	354.6		176.9	506.3	191.8	184.5	268.7	414.8	152.7	338.8
12.05	255.9	229.3	352.1	345.1	181.3	328.3	237.4	359.9		180.2	504.7	187.2	180.1	259.8	419.4	148	329.3
12.0667	258.5	226.6	355	336.4	192.7	320.4	234.6	345.3		181.4	492.2	192.4	172.9	259.1	404	150.8	335.9
12.0833	256.7	240.3	349.7	372	196	313.5	230.7	348		176.3	492.6	190.2	178	268.2	414.8	152.5	339.6
12.1	245.8	242.5	335.4	344.8	190.2	311.4	235.3	347.4		167.6	499.1	200.1	181.6	263.6	397.7	177.8	332.1
12.1167	251.4	232.4	332.1	358.9	191.8	312.7	234.9	357.6		165.8	519.2	195.6	177.5	265.4	394.9	154.4	340.7
12.1333	256.6	225.3	329.3	335.6	194.1	328	229.9	351.5		156.8	507.8	194.2	164.4	265	408.3	159.3	331.9
12.15	256.4	226.2	331.5	353	194.5	330.8	231.1	358.8		182.5	523.5	195.4	170.9	269.2	401.6	154.2	346
12.1667	262.6	228.5	361.4	346.7	190.5	312.3	242.4	353.4		164.6	495.3	200.9	179.9	276.7	416.3	160.7	325.5
12.1833	253.5	245.5	352.5	346.4	191.7	324.8	236.9	362.3		176.6	528.8	191.9	184.3	259.8	407.5	157.4	328.3
12.2	258	235.7	345.6	338.6	199	312.8	226.5	355.1		168.9	525.8	194.4	178.7	268.7	413	159.1	337.1
12.2167	261.4	230	338.7	344	202.2	316.2	228.2	355.7		167.3	535.6	197.5	176.4	262.2	415.4	151.7	326
12.2333	254	239.9	347.2	368	204.1	328	223.2	377.4		173.9	523.2	194.6	177	276.5	407.1	154.8	323.8
12.25	249.5	242.5	386.9	351.5	199.5	320.1	230.7	345.3		165.8	521.9	192.7	176.7	263.8	405.4	154.7	331.2
12.2667	241.9	239.2	383.3	356.9	198	319.2	232.5	350.5		176	520.5	185.9	170.7	265	403.9	159.2	325.5
12.2833	255.6	240.3	370.2	332.6	190.7	332.8	225.9	352.6		168.2	532.3	188.8	176.8	280.9	398.2	149.2	333.4
12.3	252.6	233.1	349.7	362.4	194	314.4	220.9	358.5		170.8	535	201.7	174.1	274	396.5	153.7	331.7
12.3167	256.8	242.6	348.8	344.8	193.9	327.8	231.2	359.9		172.9	539.2	178.6	176.7	281.3	389.5	158.7	335.7
12.3333	261.8	240.1	352.7	335.3	196	322.2	253.8	352.4		173.7	549.9	180.2	165.6	280.6	414.2	161.1	340.8
12.35	261	242.4	364.5	335.9	183	321.4	253.9	356		171.1	505.3	181.6	172.8	274.7	399.6	155.6	332.4
12.3667	263.1	241.2	371.1	345.1	186.8	347.6	259.3	359.7		172.7	501.2	192.3	177.2	265.7	402.5	148	317.4
12.3833	266.3	243.1	348.6	343.9	185.5	309.3	254	349.2		177	508.3	199.4	173.8	274.9	420.8	150.2	315.3
12.4	253.4	239.3	347.9	340.2	182.3	325.5	258.8	346.8		181.3	520.2	195	174.9	270.6	399.6	145.9	333.3
12.4167	250.5	245.3	371.6	357.7	205.8	317	277.5	351.9		178	505.4	190.5	186	270.5	404.8	150.8	330.4
12.4333	269.1	238.9	359.8	352	193.9	315.9	252.7	349.9		178	501.1	191.2	178	289.3	388	151.8	330.6
12.45	256.9	241.6	337	341.5	190.8	314.6	257.9	351.5		175.3	507	200.2	178.2	266.4	427.9	149.8	307.8
12.4667	257.8	241.6	353.8	356.8	197.1	327.7	237.7	351.3		182.7	507.2	205	179.7	283.4	396	150.4	335.2
12.4833	275.1	235.6	338.8	334.8	197.7	316	227.3	355.5		181.6	485.8	200.3	177.1	290.3	392.1	151.7	322.8
12.5	259.4	227.8	359.6	354.6	197.4	321.1	239.8	365.1		177.3	493.4	204.7	173.3	276.5	402.9	152.8	338.8
12.5167	254.3	231.4	405	347.2	190.3	324	242.9	350.5		173.2	519.3	203.3	174.1	275.9	393.5	152.9	332.7
12.5333	248.3	232.8	419.9	325.6	199.3	324	234.5	354.2		174.3	501.5	200.5	184.1	288.8	418.2	147.7	332.3
12.55	246.3	240.8	371.8	348.3	194.4	313.5	229.8	348.6		169.2	520.2	208.7	182.9	277.6	387.4	161.8	332.7
12.5667	232.4	238.6	356.8	366.5	182.3	328.2	217.8	348.1		167.4	513.3	201.5	173.7	274.4	395	149.2	334.3
12.5833	241.3	234.8	340.6	356	186.3	327.6	235	350.4		167.1	527.6	197.3	190.2	275.9	412	164	323.5
12.6	238.3	241.5	342.3	352.8	195.5	326.5	228.1	346.8		177.5	519.7	192.7	183.4	268.6	406.8	149.4	317.8
12.6167	238.1	243.8	369.4	328.5	178.5	329.6	237.5	352.9		170.5	527.7	184.9	197.4	277.9	404.7	153.8	319.6
12.6333	236.7	234.5	361.5	341.1	192.8	325.2	232.5	345.4		182.4	529.2	189.9	181.3	291.9	399.8	146.7	325.8
12.65	245.4	232.8	356.4	366.7	198.7	310.1	222	364.8		185.5	545.4	188.9	174	285.2	407.3	152.5	332.6
12.6667	240.8	237.4	344.2	362.3	192.1	312.2	248.7	364.6		172.3	544.2	192.8	172.5	291.4	417.8	157.6	322.5
12.6833	254.4	238.6	353.9	361.5	180.5	306.5	238.2	361.6		181.2	522.5	200.2	171.8	287.3	421.2	155	331.6
12.7	268	238.7	345.2	377.4	200.2	319.2	243.3	373.6		175	534.1	193.4	172.2	292.9	424.5	151.3	332.2
12.7167	259	229.8	370	356.5	198.1	321	241.7	364		177.6	528.1	189.4	178.8	265.1	411.5	154	351
12.7333	262.2	229.3	414.7	353.2	192.3	329.1	243.5	357.7		168.5	544.2	204.9	190.9	275	408.1	158.1	341.9
12.75	261.8	234.8	414.6	370.5	191.1	319.9	220.1	351.2		162	538.3	197.8	178.7	281.7	394.9	150.1	320.2
12.7667	259.2	228.6	371	364.2	189	322.1	233.2	369.8		168.4	526.5	196.1	181.7	278.2	410.7	146.3	338.1
12.7833	258	244.7	374.5	368.6	194.3	320.4	227.5	362.1		173.7	515.5	196.3	178.8	274.3	400.7	147.1	333.8
12.8	262.9	233.2	357.1	354	191	311.5	222.4	357.6		177.8	490.5	194.5	178.9	273.5	406.4	152.4	338.6
12.8167	242.7	234.7	358.7	357.3	184.3	313.3	231.2	351		181.7	498.2	190.6	180.8	283.6	393.3	154.7	331.9
12.8333	245.8	229.5	400.5	341.8	191.7	340.9	222.8	367.6		181.8	493.2	208.8	179.8	275.9	405.3	155.7	317.8
12.85	259.9	228.6	369.2	336.2	193.1	313.2	228.9	360		173.3	496	202.1	166.7	277.7	404.3	148.6	320.4
12.8667	264.5	230.4	353.6	358.9	187.6	330.9	225	356.2		167.9	500.3	192.7	171.3	268.1	404.4	158.5	348.4
12.8833	264.1	233.5	382.4	336.6	196.7	318.3	222.9	366		171.1	475.6	191.4	171.4	268.7	400.3	152.4	332.7
12.9	250.3	233.4	378.5	355.9	190.7	309.3	215	357.1		177.4	503.4	192.7	169.7	275.1	404.1	156.9	332
12.9167	253.6	239.2	361.3	359.4	198.3	325.6	218.8	378.6		174.6	489.7	201	178.2	268.8	421.9	154.1	330.1
12.9333	243.8	239.5	357.5	354	186.3	314.9	219.6	369.3		181.2	507.9	199	177.8	258.9	396.6	152	334.7
12.95	259.9	245.8	345.9	356.3	188.1	321.2	224.3	351		173	508.8	199.1	181	275	403.5	148.1	325.3
12.9667	260.8	234	361.3	368.4	198.6	317.3	231.7	353.9		178.6	535.9	189.8	185.9	271	398	149.3	328.5
12.9833	261	240.2	347.6	360.2	196.7	310.3	210.1	357.4		168.5	520.9	194	186.3	277.2	419.5	147.6	331.4
13	277.3	230.1	361.5	371	184.5	323.5	218.6	352.3		167.7	518.9	195.5	174.9	277.7	399	152.8	336.5
13.0167	267.3	240.8	355.7	335.3	191	315.2	245.5	359.8		172.4	533.3	189	187.7	283.8	405	152.3	346.7
13.0333	266	243.6	357.7	347.3	185.4	325.1	227.3	374.4		170.7	524.4	196.3	183.2	275.2	396.7	149.7	341.6
13.05	254.1	232.8	378.6	355.3	191.1	310.2	218.1	377.7		171.2	526.2	190.9	187.1	283.9	392.2	166.4	324.7
13.0667	253.7	235.7	392.9	353.9	188.3	321.6	218.2	359.1		171.8	518.3	202	174.2	280.9	402.5	156.7	337.1
13.0833	264.6	249.1	379.1	351.8	196.8	312.2	231.5	352.6		172.4	514	202.7	174	276.8	399.2	160	315.4
13.1	254.4	234.3	364.6	346.8	184.1	306.8	212.9	361.5		173.4	531.5	203.7	178.3	285.2	424.3	155.4	323.4
13.1167	256	229.5	366.1	357.3	192.5	325.2	230.6	359.8		174.5	513.3	201.7	190	282.9	394.5	148	324.8
13.1333	259.5	231.3	388.5	357.5	190	312	230.6	354.4		172.7	530.7	199.9	178.5	270.5	413.6	159	322.5
13.15	243.7	229.9	358.4	341.2	192.4	316.7	228.4	376.2		185.1	512.8	200.9	189.4	266.1	413.2	156.4	341.6
13.1667	255.8	239.9	353.7	364.2	189.7	312.9	225.3	359.1		167.2	488.9	197	181.6	269.2	406.2	162.2	347.9
13.1833	269	238.9	355.2	351.4	188.5	318.6	235.1	367.2		168	502.9	206.8	172.6	274.1	432.3	160.3	339.2
13.2	259.7	234.2	387.4	342.7	191.3	317.5	227	370.3		168.5	499.2	204.4	175.3	276.9	404	151.6	343.4
13.2167	275.1	241.4	429.4	351.3	196.2	320.3	234.5	364.6		172.8	492.1	187.1	168.3	290	404.7	147.7	346.1
13.2333	258	234.1	384.4	354.3	195	310.9	228.6	386.8		175	500.4	192.3	174.8	291.8	413.6	153.7	333.4
13.25	250.8	236.2	372.5	340.8	202	327.3	218.1	361.6		173.8	495.4	190	168.4	286.9	393.8	151.7	335.9
13.2667	247	237.3	345.3	358.9	194.7	324	223.3	363		165.4	489.3	193	178.5	289.1	378.2	154.3	328.1
13.2833	248.5	236.5	346.3	349.7	199.3	328	236.5	370.6		169	491.1	193.8	189.6	280.2	391	152.7	320.7
13.3	260.1	241	363.6	358.6	185.4	318.4	250	358.4		172.8	487.6	202.6	185.5	279.5	405.2	149.1	318.4
13.3167	264.4	238.2	365.1	343.3	184.7	316.6	237.3	360.1		174.8	501.5	188.4	180.6	278.8	398.8	142.9	318.1
13.3333	260.8	236.1	355	341.4	193.2	339.4	226	360.1		173.3	504	192.2	178	273.3	409.8	151.9	323.1
13.35	265.7	227.1	357.8	353.3	186.9	341.2	233.9	347.8		172.7	528.8	189	184.6	298.9	416.3	149.8	336.7
13.3667	268.6	239.7	384.3	333.4	191.2	298.6	248.1	361.3		170.2	524	197.1	172.8	291	418	147	333.3
13.3833	258.8	243.1	342.7	350.2	190.8	326	247.6	373.7		172.2	522.2	194.8	174.9	287.2	401.6	151.4	331.7
13.4	268.7	239.2	332.6	347.6	190.5	317.9	229.5	364.8		174.5	519.7	197.8	173.6	285.9	401	150.8	324.6
13.4167	268.4	241.1	349.1	377.6	189.3	330.8	236.2	357.4		162.9	511.5	195.3	173.7	288.6	402.9	161.3	332.2
13.4333	267	235.6	355.4	372.5	197.3	320.8	238.5	361.6		170.6	523.4	205.4	184.3	294.4	401.4	148.8	345.3
13.45	265.4	234	350.3	361.9	199.6	312.9	231.7	361.3		183.2	522	206.2	170.2	276.8	397.6	152.7	342.9
13.4667	255.8	241.5	368.6	333.4	199	309.7	231.9	357.3		169.5	510.3	200.4	187.1	287.6	386.3	145.8	334.7
13.4833	261.4	245.1	358.6	384.8	193.2	321.4	226	353		170	518.4	210.3	185.1	276.4	406	139.4	347.7
13.5	252.4	234.9	399	343.1	194.3	324.1	228.5	361.7		170.4	512.4	206.8	178.3	289.4	389	148.4	337.6
13.5167	267.9	237.2	401.7	338.5	199.7	312.3	230.5	349.5		170	494.6	205.5	184	284	411.6	148.3	334.6
13.5333	253.2	239.7	379.8	345.1	197.5	324.9	249.6	363.1		182.1	501.7	214.2	182.7	279.6	400.4	155.6	330.6
13.55	264.3	232.8	360	345.1	192.3	310.5	236.6	363.4		162.2	516.1	194.6	183.7	276.3	398.1	152.3	336.8
13.5667	257.7	247.7	357.3	370.7	194.5	314.1	228	351.7		158.6	498.5	189.9	187.9	288.6	412.3	148.1	334.5
13.5833	264.9	235.1	378.1	391.6	195.1	324.8	235.1	367.5		172.4	501.8	188.1	190.6	283.6	409.9	153.5	334.3
13.6	251	238	382.3	378.5	187	311	228.7	366.7		162.1	503.5	200.1	181.7	280.1	402.5	154	317.7
13.6167	253.6	234.1	361.8	375.7	183.7	327.6	243.1	357.2		168.8	510.7	198.6	177.4	290.1	409.8	157.8	331.9
13.6333	253.9	236.5	383.4	375.8	189.7	324.3	234.9	364		171.7	506.4	184	181.3	289.3	395.3	151.4	332
13.65	257.4	233.9	384.2	378.6	189.3	319.5	233.1	349.9		171.6	501.4	197.4	183.2	286	403.1	142.6	336.9
13.6667	262.1	232.1	381.8	354.4	192.1	317	221.3	357.5		174	511.9	192.5	181.8	283	398.1	149.5	328.6
13.6833	264.8	236.7	356.7	344.3	194.5	309.3	236.7	354.6		163.7	514.9	191.2	180.7	302.1	402.9	149.9	330.4
13.7	276.5	238.1	367.8	343.8	193.8	320.4	231	359.5		163.8	505.1	189.1	182.1	293	414	152.5	332.7
13.7167	272.7	230.4	342.2	344.2	199.3	309.5	228.9	369.8		174.7	517.6	186.4	188.9	290.6	386.7	159.1	354.4
13.7333	267.6	234.9	364.4	367.5	196.1	311.1	243.4	371.1		177.1	542.9	190.3	192.9	291.1	406.1	148.5	322
13.75	268.8	243.9	364.7	357	188.5	317.8	239.7	369.5		177.6	512.8	192.1	192.9	301.9	409	148.5	332.6
13.7667	249.4	235	368.8	353.7	188.6	322.7	239	365.1		162.3	508.8	195.2	190.6	294.4	403.1	150.6	348.6
13.7833	266.9	230	355.3	337.6	191.6	323.3	247.8	360.5		177.8	529.6	203.3	181.8	288	398.9	148	325.1
13.8	261	231.8	352.5	348.3	190.1	323.4	246.9	369.5		172.7	520.4	205.3	181.7	291.9	399.6	150.7	330.6
13.8167	259.3	238.9	350	362.7	195.9	333.2	246.3	359.8		172.3	525	195.6	190.5	288.4	394.7	148.6	334.1
13.8333	247.8	245.7	345.1	347.1	194.4	318.6	259.9	371.1		164.6	528.8	203.9	181.7	287.6	406.3	145.8	329.4
13.85	255.8	231.6	332.7	363.4	190.9	327.7	239.5	358.9		157.3	526	205.1	178	291.8	400.3	147.7	337.5
13.8667	268.7	228.7	353.5	341.2	191.7	307.9	245.6	355.9		175.7	514.5	209.5	182.1	284.1	406.6	158.8	344.8
13.8833	267.2	240.2	373.8	347.4	188.5	308.9	251.3	378.5		168.4	516.9	202.9	179.4	290.3	413.3	149	341.6
13.9	265.9	223.1	422.4	348.6	193	304.9	236.7	367		172.6	508.9	193.4	207.1	298.8	399.9	151	339.4
13.9167	261.7	229.2	421.3	340.6	190	313.9	230.6	364.2		175.7	491.8	198.7	248.1	294.5	393.3	145.8	339.9
13.9333	259.2	232.8	380.6	349.2	189.4	308.2	246.8	376.1		180.1	504.3	186.9	231.3	291.6	401.3	145.4	333.9
13.95	254.6	245.3	364.4	358.7	197	300.5	235.7	377.5		171.5	479.2	194.3	232.9	287.7	412.4	147.5	354.9
13.9667	258.6	231.4	364.5	361.4	197.3	306	238.7	367.3		174	484.5	194.7	216.2	296.8	400.5	144.5	343.5
13.9833	271.2	226.8	359.9	370.2	193.7	303.2	237.4	350.4		175.8	509.6	192.5	203	303.6	399	150	335.9
14	268.3	233.5	383.7	361.5	190.9	306.2	234.6	363.8		169.6	505.3	184.4	196	297.4	389.7	139.1	320.5
14.0167	281.2	247.6	392.7	377.6	187.8	296.3	230.7	350.4		165.5	504.2	186.7	188.6	282.1	390.8	151.7	338
14.0333	254.8	241.2	357.4	382.7	193.5	298.9	235.3	367.1		181.6	512.6	193	200.2	286.9	419	150.9	326.7
14.05	251.8	235.9	351.3	368.8	193.6	317.9	234.9	377.7		173	511.6	201.7	189.9	307.9	405.4	148.5	350.3
14.0667	259.7	238.6	364.9	356	191.3	305.6	229.9	372.2		168.5	521.4	195.5	200.7	287.5	404.9	151.3	321.5
14.0833	260.7	234.2	380.7	360.1	193.8	307.9	231.1	368.3		183.3	498.5	190.8	193.9	299.2	391.6	153.1	339
14.1	257.4	243.3	369	352	191.3	310.8	242.4	358		158.4	524.2	202.3	200.2	291.6	412	149.8	333.9
14.1167	267.3	234.7	389.1	349.1	191.1	306.8	236.9	361.5		173.1	542.8	205.7	187.1	307.4	410.2	148.4	338.1
14.1333	274.5	239.9	388.6	338.2	187.5	328.3	226.5	368.5		177.2	523.6	208	186.5	294.6	395.6	155.2	327.5
14.15	277.1	241.3	375.2	338.5	189.1	305	228.2	371.6		169.2	521.7	203.9	195.5	304.8	400.8	145.8	324.3
14.1667	259.1	235.6	376.4	345.4	187.2	308.5	223.2	365.1		171.6	520.7	200.5	179.6	301.5	391.3	145.9	344.1
14.1833	264.9	232.6	379	375.4	186.3	310.2	230.7	365.3		171.6	523.3	198.3	178	301.4	406.3	139	334.2
14.2	274.7	242.4	347.9	346.8	192.2	320.9	232.5	376.9		169.4	545.1	212.7	187.6	278.5	414	151.3	339.5
14.2167	269.7	249.3	362.4	350.8	186.4	301	225.9	369.1		173.1	537.9	200.5	191.4	287.9	402.8	152.8	342.1
14.2333	248.1	231	349.9	358.4	188.4	309.9	220.9	371.1		166.2	529.7	190.2	196.1	289.6	394.7	154.2	324.2
14.25	251.8	239.9	387.4	353.9	181.2	331.5	231.2	374.2		161.3	523.3	190	185.3	297.7	393.2	145.6	342
14.2667	258.2	229	403.9	384.5	190.7	314	253.8	368.1		164	520.8	188.7	200.4	304.2	416.1	147.3	338.2
14.2833	256.6	234.6	417.8	362.2	189	323	253.9	360.6		181.5	514.4	196.7	196.7	293.7	395.9	155	339.1
14.3	262.4	227.7	411.9	357.1	194.7	306	259.3	370.8		189	512	198.4	185	283.2	404.9	153	330.3
14.3167	267.4	236.1	370.6	375.3	190.2	325.8	254	373.5		171.3	507.2	188.9	191.5	295.3	397.6	150.3	331.3
14.3333	272.1	233.8	375.4	362	206.8	342.7	258.8	373.8		165.9	491.4	196.6	186.2	290.9	396.4	146.6	353.8
14.35	263.7	230.9	376	340.2	193.6	334.5	277.5	383.5		174.8	499.2	193.8	194	287.4	411.4	147.8	334.2
14.3667	295.2	236.8	395.9	352.2	188.5	319.9	252.7	377.8		167.6	519.2	194.3	187.1	295.7	395.4	147.1	342.6
14.3833	263.2	237.8	391	355.4	189	307.9	257.9	377.3		166.2	501.7	199.5	196.2	289.3	402.6	147.3	330.5
14.4	253.1	229.7	399.1	347.8	187.5	308.9	237.7	375		165.2	498.8	196.5	195.2	288.7	421.1	146.6	335
14.4167	258.9	248.9	400.5	345.2	187.9	319.5	227.3	363.6		168.6	504.2	196.1	189.1	273.8	383.9	143.5	341.4
14.4333	260.5	250	375.1	361.3	184	307.6	239.8	388		158.4	498.9	199.6	183.9	292.2	395.5	150.2	354.6
14.45	263.3	243.9	384.1	360.8	196.1	307.3	242.9	374.2		167.2	501.2	196	192.7	290.7	397.4	150.8	337.1
14.4667	273.9	240.9	369.8	361.1	187.8	303.5	234.5	359.9		173.7	513.6	200.2	186.8	289.2	393.1	150.8	319
14.4833	268.5	241.9	368.3	359.9	197.7	312.5	229.8	376.5		164.8	505.7	206.2	179.5	296.6	400.4	157.3	334.9
14.5	265.2	238.6	360.2	359.8	193.2	285.9	217.8	363.8		173.9	514.9	210.6	188.7	298.8	410.5	152.4	340.7
14.5167	267.5	240.8	371	356.1	191.7	321.5	235	365.7		169.9	514.8	206.8	192	305.7	425.9	151.1	345.4
14.5333	284	233.7	369.8	359.9	192.4	303.8	228.1	363.5		169.7	513	197.4	189.6	299.4	410.2	151.6	335.5
14.55	278.5	233.6	357.4	373.8	187.8	303.2	237.5	374		169	537.1	199.6	187.7	294	410.7	149.4	314.3
14.5667	268.3	225.2	361.8	359.9	196.4	286.7	232.5	354.2		173.3	513.8	204.6	194.5	304.5	404.4	154.7	322.9
14.5833	265.2	235.3	391.5	368.7	192.7	313.7	222	355.5		163.5	531.6	199.3	184.5	298.3	404.5	154.5	327.4
14.6	276.5	234.4	362.2	341.7	195.8	306.5	248.7	355.5		169.7	523.9	194.2	186.6	310.1	399.8	148.1	329.5
14.6167	261.1	230.2	357.9	348.2	194.4	320.9	238.2	369		163.3	515	190.9	197.7	305	427	147	337.1
14.6333	269.2	229.2	381.5	341.1	193.4	323.9	243.3	362.2		162	523.8	200.2	200.2	299.8	409.2	153.2	333.4
14.65	253.9	231.5	406	328.1	198.7	349.4	241.7	364.9		176.6	523.9	192.8	201.3	297.5	408.5	151.1	330.5
14.6667	250	232.2	402.5	336.7	188.9	317.7	243.5	365.7		161.5	533.5	193.2	191.5	314	409.2	160.6	333.7
14.6833	267.5	229.1	390.6	346.7	185.5	312.1	220.1	365.6		166.7	508.1	194.3	206.9	305.2	409.8	157.2	338.8
14.7	269.1	236	386.8	347.8	194.4	335.5	233.2	366.5		171.6	505.8	186.5	194.9	297.3	398.1	154	355.1
14.7167	272.1	230.7	418.1	345.6	188.8	315.8	227.5	372.7		169.9	511.1	188.1	200	304.9	396.9	147.7	330
14.7333	254.5	235.3	405.3	347.2	181.4	329.1	222.4	371.9		171.9	505.7	194.9	196.1	307.3	420.4	151.9	339.7
14.75	269.6	237.2	382.1	354.1	188.4	327	231.2	373.2		159	491.3	201.8	195	311.8	380.2	156.6	327.9
14.7667	257.5	236.2	370.9	354.8	193.4	308	222.8	377		171.1	510.3	190.8	194.7	298.9	385.8	154.1	335.8
14.7833	252.8	230	379.8	341	191.6	307.2	228.9	373.3		175.8	510.6	204.1	195	296.9	402.5	152	336.7
14.8	259.7	234.3	367.8	360.8	192.9	323.6	225	369.6		176.5	498.7	195.4	193.9	281.7	400.4	153.9	345.4
14.8167	259.1	232.5	389.6	358.8	192.5	340.3	222.9	365		170	500.7	205.1	193.2	287.7	387	151	348
14.8333	262.2	234.6	374.2	339	193	309	215	363.8		175.7	518.7	205.2	197.8	299.1	409	151	340.6
14.85	276.1	234.2	356	329.3	199.3	300.8	218.8	399.6		177.2	502.2	202.2	200.5	288.7	415.1	160.9	344.2
14.8667	272.9	232	385.1	336.6	183.2	304.8	219.6	370.5		167.3	519.4	212.1	200.4	299.7	397.3	148.1	338.3
14.8833	277.7	230.3	381.9	345.4	189.6	313.3	224.3	367.8		172.3	500.8	197.2	196.3	297.8	403.5	143.8	344.8
14.9	261.4	243.1	363.9	321	190.7	299.6	231.7	375.2		168.4	510.3	195.3	185.2	291.7	403.7	144.8	338.1
14.9167	252.1	240.5	367.2	338.6	191.8	319.9	210.1	360.8		164.7	509.4	199	190.8	292.1	403.6	149.8	339.8
14.9333	264.1	244.2	374.9	351.4	190	307.2	218.6	362		169.2	532.2	201.5	192.4	302.3	393.8	142.3	340.4
14.95	259.4	236.2	424.2	339.5	191.6	312.2	245.5	352.6		164.2	525.6	192.3	191.8	307	399	152	339
14.9667	263.4	234.4	412.5	349.5	198.5	305.8	227.3	370.2		167.6	511.7	200.8	201.8	312	390.5	154.9	331.3
14.9833	258.4	235.6	378.8	357	197.1	310.4	218.1	379.5		170.7	520.1	193.9	199.5	309.3	407.8	147.9	333.1
15	263.5	229.4	381.9	371.3	198.8	313	218.2	368		181.1	510.4	181.1	202.8	292.4	395.1	148.8	329.2
15.0167	258.5	237	400.7	391.1	195.5	297.9	231.5	368.5		163.6	506.9	189.6	195.7	297.6	397.2	156.5	338.7
15.0333	258.7	238.9	373.6	399.3	190.6	309.1	212.9	368.9		168	500.9	180.9	203.9	315.4	398.1	150.9	325.8
15.05	252.7	236.5	393.8	366.8	195	363.1	230.6	361.3		170.3	517.7	193.5	205.3	305.2	401.9	154.2	339.2
15.0667	254.4	233.9	373.6	353.9	192.3	318.9	230.6	356.4		173.9	490.6	196.6	199.6	308.3	391.6	151.5	344.4
15.0833	249.8	231.2	387.8	343.5	193.7	320.1	228.4	351.8		173	477.6	189	199.6	309	404.2	156.6	332.3
15.1	257	231.9	388.3	346.1	187.8	313.7	225.3	340.3		164.7	506.4	192.3	202.5	291.9	403	155.8	334.5
15.1167	268.9	232.1	392.3	338.8	187.9	307	235.1	358.9		165.1	513.5	196.7	204.2	294.9	392.5	150.6	335.9
15.1333	270.2	231.7	401.3	353.9	187.6	306	227	372		159.8	525.7	189.6	195.5	311.5	391.9	149.2	338.1
15.15	273	237	373.3	351.1	194.7	303.8	234.5	380.5		180.5	521.3	189.1	198.1	313.1	418.3	148.3	342.7
15.1667	284.6	232.6	376.7	365.2	188.5	319.7	228.6	357.6		172.7	514.7	200.2	193.4	314.1	412.3	153.1	338.6
15.1833	281	239.8	392.2	344.3	198.6	320.8	218.1	367.4		173.1	529.3	194.2	194.9	298.6	399.7	146.7	350.6
15.2	274.1	240.5	442.5	346.6	197.7	303.8	210.5	352		175.4	507.3	190.4	198.4	321.4	405.6	146.8	341.7
15.2167	276.1	230.9	432.7	363	193.2	307.4	226.4	351.4		175.3	535.8	200.1	192.7	300.1	405	144	332.5
15.2333	273.7	233.1	389.2	379.1	203.2	322.6	218.9	355.2		173.2	540.6	193.4	198.7	311.3	416.4	157	353
15.25	282.4	243.2	378.4	368.9	200.7	316.7	242.2	362.2		178.4	520.2	201.5	208	290.5	382.5	151	327.8
15.2667	279.6	230	393	363.3	191	305.7	213.8	350		167.9	501.1	209.8	203.1	307.1	399.7	144.3	341.3
15.2833	280.9	236.6	389.7	367.4	189.7	313.7	229.4	357.1		163.6	515.1	197.4	200.5	298.4	420.6	153.4	348.8
15.3	272	246	379.6	356.7	187.5	332.4	244.1	363.2		167	510.6	193.6	194.5	300.3	405.6	155.4	340
15.3167	263.4	235.8	394.8	386.4	186.3	309.7	248.6	358.6		169.8	489.9	193.3	194	312.3	395.1	152.6	332.8
15.3333	278.1	243.6	409.1	343.1	190.7	329	239.4	372.5		172.6	477.2	200.7	190.7	304.2	389.7	153.9	331
15.35	264	226.9	392.5	379.3	199.2	314.8	237.1	364.5		172.8	497.6	201.2	198.5	309.8	399.6	164.5	338.9
15.3667	280.8	234.4	382.3	351.4	190.1	309.9	255	372.6		175.4	504.4	200.3	194	304.5	388.1	143.3	327.7
15.3833	263.5	238.7	382.4	347.7	193.2	310.6	238.2	372.3		163.6	500.8	200.3	196.1	302.5	401.4	151	338
15.4	275.4	238.8	402.9	347.1	193.1	328.3	249.2	362.4		171.3	484.1	200.2	205.5	291.4	401	147.7	342.8
15.4167	257.2	254	415.8	343.1	188.1	311.3	262.7	376.7		163.8	495.9	192.3	205.7	294.1	397.2	151.6	335.3
15.4333	266.3	243.7	378.7	341.2	191	324.3	252	364.5		168.9	478.7	194.2	205.4	313.1	389.3	149.8	348.6
15.45	259.6	231.5	386.5	345.6	193.1	315.4	242.4	370		159.1	507.8	195.3	200	304.6	416.1	148.3	335.6
15.4667	254.1	242.9	393.6	334.2	196.8	303.1	230.5	366.4		171.4	502.4	193.3	200.5	304.7	376.7	158.4	349.4
15.4833	267.9	238.7	382.1	373.3	196.4	297.8	236.4	370.9		169.6	484.5	200.1	194.6	307.2	403.9	146.4	340.3
15.5	274.4	243	387.6	371	198.7	309.1	229.4	374		174.4	494.1	205	189	312.1	402.3	157	329.8
15.5167	275.4	247.8	396.5	366.5	192.4	308.1	245.9	386		171.8	507.4	197.6	192.4	307.2	393.7	153	316.6
15.5333	278	247.8	399.1	377.6	188.2	301.4	240.7	382.5		169.7	529.2	206.4	204.2	293	397.3	145.1	321.1
15.55	276.3	237.3	389.8	363.8	188.5	338.3	239.6	382.3		167.7	523	192	198.6	311.2	406.8	151.4	330
15.5667	271.8	228.5	368.8	356.6	193.8	312	249.8	363.1		167.2	514.7	193.4	192.7	301.1	403	148.1	326.9
15.5833	256.1	230.1	408.2	340.9	194.8	319.9	241.2	353.9		166.1	522.3	189.5	211.8	307.9	397.1	149.9	341.2
15.6	259	233	387.6	355.8	195.4	326	247.2	365.6		162.1	509.1	186.8	210.4	307.2	392.3	150	338.9
15.6167	260.1	231.5	365.6	356	191.7	330	243.1	387.3		164.8	555.2	182.5	199.1	300.5	397	152.9	325.4
15.6333	260.5	232.2	367.2	368.4	198.7	321.4	248.1	376.4		161	534.2	186.1	183.1	303.2	403.1	149.5	332
15.65	272.6	235.8	379.6	335.4	198.9	344.6	249.3	373.2		162.7	511.2	175.3	191.4	318.8	413	151.4	328.8
15.6667	265.3	232.1	387.8	359.8	196.3	316.2	248	372		171.6	483.3	179.9	191.6	291.7	402.3	150.5	336.2
15.6833	266.8	243.5	413.7	374.7	191.3	319.5	256.2	361.1		173.2	497	185.6	186.9	310.6	409.7	144.6	339.3
15.7	267.5	235	427.9	372.3	192.3	309.6	248.9	368.5		163	469	195.5	193.8	313.3	398.9	147.9	345.4
15.7167	262.2	230.5	415.9	371.3	194.5	321.9	245.9	365.7		159.5	477.5	201.5	199.5	302.9	400.5	141.3	347.9
15.7333	270.6	232.7	391.3	403.6	187.2	321.6	254	364.4		172.4	476.5	192.7	195.2	304.5	390	148.3	332.7
15.75	259.3	226.8	395.5	397.3	183.2	319.2	246.2	378.9		163.2	485.2	197.1	204.9	307.2	388.2	162.3	330.8
15.7667	282.7	219.4	393.9	361.3	187.1	322.4	259.7	377		162.8	477.8	193.9	194.6	295.8	393.8	157.9	337.4
15.7833	268.8	230.6	403.3	373.2	189.9	314.6	244	376		172.3	495	185.1	198.6	317.9	403.8	149.3	339.7
15.8	265.1	230	395.9	360.2	193.9	306.2	247.1	388.8		165.4	489.6	203.6	196.6	302.3	402.2	150.3	330.9
15.8167	267.3	229	385.1	348.4	202	316.1	245	373		179.5	490.6	202.2	192.2	310.5	403.8	145.2	349.5
15.8333	277.5	235.6	382.8	358.9	197.1	321.9	243.2	363.8		164.4	482	196.9	187.7	298.7	391	146.7	344.7
15.85	286	237.8	368.4	372.9	193.9	304.9	247.2	372.8		172.6	509.1	195.8	199.5	303.7	413.2	151.7	331.7
15.8667	264.2	235.6	389.7	352.1	194.6	310.9	241.6	371.2		165.5	503	188.4	193.4	306.2	401.3	151	326.6
15.8833	270.5	239.9	381.4	370.6	198.1	322.6	252.4	367.2		182.9	507	197.9	188.5	304.7	407.9	150.4	334.3
15.9	279.5	250.7	384.8	349.4	189.6	310	236.7	368		173.3	507.8	190.9	192.1	314.8	412.9	147.7	329.5
15.9167	270.3	238.5	383.2	351.6	192.1	320.7	237	369.1		176.2	505.6	197.7	192.1	304.9	396	147.5	329.5
15.9333	272.6	236.6	424.3	365.3	185.9	300.4	243.7	378.9		175.1	501.4	201.8	187.4	300.2	406	155.1	356.4
15.95	264.2	246.7	397.7	365.6	195.4	325.5	232.1	376		164.9	531.2	192.8	190.4	310.4	396	158.8	335.5
15.9667	258.1	245.9	389.3	363.7	195.8	317	237.2	372.6		172.7	537.3	191.7	185.1	314	395.6	146.7	347.5
15.9833	269.9	240.6	383	355.9	200.4	315.6	247.8	359.3		162.6	512.9	194.8	208.8	301.4	399.7	149.7	344.7
16	265.5	244.8	374	369.3	193.1	319.4	233.9	386.4		172.7	526.8	179.4	207.3	299.4	375.5	158.8	333.4
16.0167	256.9	247.4	378.9	340.5	194.4	316.7	223.3	367.4		181.1	520.4	181.6	212.3	305.4	388.7	151.1	333.9
16.0333	256	245.3	394.4	319.2	184.7	319	236.5	386.6		159.1	515.4	189.3	197.6	321.6	394	146.8	331.6
16.05	259.5	248.9	401.8	347.6	193	312.6	250	384.4		166.3	490.4	186.1	213.2	314.4	419.4	151.7	323.3
16.0667	264.8	240.1	377.1	367.3	196.1	332.9	237.3	386.4		166.7	489.4	187.7	200.4	307.3	395.2	152	341.9
16.0833	272.5	227.9	393.4	361.7	191.3	325.2	226	366.9		178.9	486.5	195.6	200.1	299	407.5	153.2	326.1
16.1	268	228.5	384.2	354.9	198.9	324.8	233.9	380		174.2	486.2	195.3	203.9	315.4	407.8	146.4	323.6
16.1167	279.8	231.9	393.2	362.6	194.4	311.7	248.1	375.4		165	494.5	190.1	197.3	307.2	406.2	161.7	328.8
16.1333	271.3	230.9	391.6	372.1	192.4	328.6	247.6	372.6		163.4	490.3	194	197.4	302.7	388.8	158.7	341.7
16.15	265.8	236.8	388	374.7	205.9	312.7	229.5	376.8		168.3	488.5	202.4	192.8	306.8	391	166.5	333.9
16.1667	266.8	239.8	379.9	386.6	195.9	318.1	236.2	376.3		178.5	495.9	195.9	186.7	319.6	399.3	161.8	335.3
16.1833	266.8	233.7	412.7	348.5	196.7	285.3	238.5	368.6		170.7	492.3	191.7	207.3	294	376.2	155.8	336.8
16.2	260.8	236.8	413.3	351.1	192.9	303.3	231.7	382.3		173.4	494.6	186.6	201	296	414.4	142.1	345.6
16.2167	271.8	232.7	388.7	356	197.8	322.2	231.9	365.8		169.7	503.1	193.9	197.7	320.5	394.1	146.1	343.1
16.2333	278.2	234.7	389	349.5	183.8	322.8	226	373.3		168.2	500.9	194.9	191.6	312.9	397.1	145	340.5
16.25	279.1	235.7	405.9	336.8	192.4	303.4	228.5	361.8		164.2	496.9	204.1	191.6	310.8	384.4	151.1	325.4
16.2667	263.1	231	383.6	347.5	195.5	319.3	230.5	384.8		174.8	497.4	200.8	193.1	302.4	388.5	149.1	329.2
16.2833	260.5	230.8	387.9	340.3	196	323.9	249.6	379.6		162.8	523	187.5	195.6	311.6	404.4	148.8	333.1
16.3	259.2	230.5	382.5	364.1	188.7	328.2	236.6	373.6		168.6	514.4	185.3	191.4	320.3	377.4	144.1	329.4
16.3167	259.5	223.6	394.1	354.8	194.5	325.2	228	369.9		166.3	528.8	197.6	199.6	303.9	404.3	143.9	334.2
16.3333	256	233	368.5	367.4	194.1	329.5	235.1	369.2		171.5	501.8	195.6	191.8	315.5	388.5	152.6	330.7
16.35	254.8	236.7	369	378.6	200.2	329.9	228.7	373.9		176.3	490	195.5	195.3	310	400	161.7	331.4
16.3667	266.1	232.6	430.2	361.2	197.1	338.4	243.1	373.7		164.2	494	194.2	205.8	309.2	396.6	155.9	331.9
16.3833	284.8	243.2	425.9	356	190.1	312.8	234.9	371		178.8	494.3	202.9	186.6	299.6	380.3	150.7	341.4
16.4	269.2	237.7	388.6	357.4	186.4	313.4	233.1	378.3		175	504.4	189	202.2	318	392.4	152.6	346
16.4167	269.8	243.5	395.5	351	198.5	330.8	221.3	391.2		158.1	488.7	197.3	198.2	317.7	387.3	145.4	333.3
16.4333	294.2	232.7	379.7	363.2	191.4	315.6	236.7	376.7		169.4	471.6	207	198	311.7	387.7	149.1	337.4
16.45	280.8	230.8	390.5	364.2	188.2	324	231	392		162.9	503.8	201.3	204.6	302.6	384.7	157.2	343.2
16.4667	272.2	225.2	390	364	192.9	322.8	228.9	396.9		166.6	481.5	201.4	207.7	292.6	388.5	159	324.3
16.4833	265.9	233.7	413.2	338.3	191.8	324	243.4	378.4		155.2	478.6	195.7	203.6	300.4	393.2	160.9	325.9
16.5	259.2	226.2	421.3	335.4	190.9	315.8	239.7	383.1		161.2	481.3	191.5	198.8	306.1	394.7	155.3	323.4
16.5167	261.3	224.4	401	367.4	191.8	329.5	239	374.7		184.3	499.6	188.5	205.8	305.5	421.7	149.4	323
16.5333	274.1	232.5	398.2	357	189.2	315.8	247.8	367.9		163.9	483.7	192.9	215.9	316.4	399.4	153.7	314.6
16.55	259	239.9	381.4	362.6	195.7	306.5	246.9	363		153.2	495.8	191.4	205.2	323.2	406.9	142.3	327.9
16.5667	273.6	231.1	403.9	353.9	191.1	315.2	246.3	370.9		174.6	506.2	196.8	216.7	304.6	397.3	145.9	324.5
16.5833	270.4	230	395.4	367.7	196.4	328	259.9	369.6		162.6	508.6	180.6	203.3	304.3	405.2	158.1	338.7
16.6	268.2	251	397.9	342.6	187.2	306.5	239.5	364.8		153.8	509.7	181.2	207.6	304.2	403.5	144.9	329.1
16.6167	271	234.3	392	368.2	195.2	317.6	245.6	353.4		171.7	519.7	195.5	206.3	307.7	401.7	143.4	334.4
16.6333	258.6	238.9	384.1	359	184.9	304.3	251.3	359.3		169.5	544.1	187.5	206.8	307.4	392.4	142.2	331.6
16.65	256	229.8	379.7	355.8	180.5	313.7	236.7	362.5		164.8	546.8	193.2	202.6	323.5	393.6	147.6	340.5
16.6667	263.6	234.3	408.8	352.6	189.4	320.7	230.6	357.3		167	517.1	182.4	202.3	312.4	374.6	161.6	343.2
16.6833	259.3	226.6	440.8	365.4	192.7	322.1	246.8	372.6		176	507	190.7	212.6	304.2	394.8	153.3	334.2
16.7	263.7	228.9	449	336.8	194.6	305.5	235.7	380.7		159.6	515.3	187.6	200.2	323.1	400.5	149.9	336.3
16.7167	263.8	231.6	415.4	340.6	195.6	324.4	238.7	383.4		162.7	504.6	196	207.3	328.4	390.1	147.4	346.2
16.7333	281.5	231.1	406.7	348.7	190.7	336.9	237.4	374.7		163.6	528.3	204.3	202	310.9	397.7	147.2	331.5
16.75	300.6	237.5	383.6	376.2	197.9	318.4	234.6	372.6		171.4	509.9	204.2	211	309.3	414.1	157.1	329
16.7667	283.4	232.2	390.2	362.7	196.3	304.7	230.7	375.8		176.8	505.2	191.9	204.7	303.6	408.9	156.6	326.5
16.7833	274.7	241	410.1	362.7	194.7	309.4	235.3	364.5		188.5	535	187.8	208.1	301.5	400.8	154.2	353.9
16.8	289.1	244.8	433.4	361.7	197.2	318.8	234.9	367		176.3	518.5	199.8	196.2	303.7	392.1	155.6	340.5
16.8167	288.2	235.1	420.3	350.3	199.5	306.2	229.9	365.3		181	496.2	204.2	209	318.1	402	151	328.1
16.8333	278.4	247.3	391.9	370.2	189.9	325.3	231.1	370.4		178.5	487.2	193.5	198.1	302.1	394	156.2	337.3
16.85	280.6	228.2	419.2	360.8	186.6	311	242.4	379.7		172.1	477.7	192.4	216.4	317	405.1	153.8	332
16.8667	275.8	228.1	422.6	350	184.4	316.4	236.9	384.1		172.4	470.9	199.3	210.9	338.9	402.5	150.9	338.3
16.8833	280.1	232.3	394.8	356.2	192.5	337.4	226.5	377.1		163.7	470.1	197.4	209.5	313.9	394	144.4	352.6
16.9	262.9	226.5	390.3	351.9	189.9	311.7	228.2	365.6		170.1	467.5	195.7	204.7	318.7	406.2	152.2	330.3
16.9167	272.1	231.8	393.7	335.7	184.7	314.2	223.2	354.3		175.4	456.6	194.9	213.9	322.8	407.5	152.6	346.1
16.9333	264.8	233.9	407.6	338.1	193.5	313	230.7	371.6		170.9	462.5	196.1	220.7	313.2	403	156.4	334.8
16.95	262.8	231	390.1	370.4	190.1	296.2	232.5	364.5		175.4	479.4	194.9	199.6	312.7	390.2	140.4	349.4
16.9667	262.9	236.8	393.4	381.5	197.7	305.1	225.9	357.2		160.7	472.5	193.6	200.7	314.9	391.4	147.7	355.6
16.9833	263.2	233.6	398.5	381.6	202.2	299	220.9	380.3		172.6	483.6	193.6	225.4	305.3	407	154.5	360.7
17	261.8	228.3	386.2	398.6	193.6	297.7	231.2	361		168.1	489.7	179.8	202.6	311.4	404.2	149.9	347.8
17.0167	280.4	239.2	401.2	375	193.1	305.3	253.8	366.2		169.5	499.4	203	200.2	302.5	405.9	153.1	355.7
17.0333	265.3	230.8	406.5	359.2	192.7	319.9	253.9	373.2		170	516.3	198.8	201.7	310.6	392.5	153.7	348.6
17.05	276.9	229.3	377	356	193	314.9	259.3	371		174.8	509.1	191.2	198.1	305.7	400.8	153	341.6
17.0667	277.6	243.3	397.1	346.2	187.7	326.4	254	358.7		168.1	521.1	194	196.7	302.3	388.3	151	346.1
17.0833	261.9	235.2	416.8	351.3	188.7	335.8	258.8	366.3		168.8	501.4	187	198.6	323.4	388.4	151.1	332.5
17.1	261.7	240.5	410.9	356.3	191.1	320.5	277.5	367.7		161.2	492.4	200.2	195.5	306.4	389.3	142.8	335.4
17.1167	270.1	238.1	393.7	367.3	194	328.8	252.7	382.9		174.3	484.2	200.5	194.8	319.6	396.5	150.8	352.9
17.1333	277.7	237.1	404.5	357.5	191	317.7	257.9	371.8		155.4	492	192	206.8	314.4	387	150.5	345.8
17.15	281.7	243.7	398.9	354.8	190.1	334.2	237.7	373.2		164.3	494	190.2	209.1	320.5	396.5	157.5	339.8
17.1667	278.7	244.3	393.9	349.1	187.7	352.2	227.3	359.8		167.1	486.9	200.9	192	320.6	398.3	151.9	338.2
17.1833	268.5	239.1	417.9	355.9	190.8	326.4	239.8	371.9		175.5	514	205.3	222.5	308	403.2	150.4	335.7
17.2	262.8	234.8	423.8	352.9	188	329.9	242.9	365.7		165.7	496.5	193.6	208.2	302.9	395.8	148.6	345.8
17.2167	263.1	233.9	411.5	362.9	196.3	322.4	234.5	382.7		173.3	496.2	203.9	204.4	314.2	407.2	152.8	337.3
17.2333	271	232	400.6	368.5	186.5	312.9	229.8	380.4		171.9	472.7	205.5	205.7	322.4	393.6	149.2	356.2
17.25	281.4	232	384.3	360.9	193.2	308	217.8	362		163.5	466.6	196.1	201.9	329.4	401.8	161.9	340
17.2667	273.2	235.3	384.4	351.4	187.9	322.6	235	373		162	465.6	195.9	218.2	305.2	393	154.2	359
17.2833	277.2	249.6	396.2	359.1	187.6	331.7	228.1	374.1		175.5	477.9	194.7	206	310.6	382.7	152.3	332.5
17.3	270.4	237.7	421.3	371.9	184	316.1	237.5	367.4		161.7	479.1	190.7	207.1	313.8	385.7	147.3	339.2
17.3167	278.6	230.3	404.4	357.7	188.3	318	232.5	381.9		174.1	463.1	188.4	199.5	309.8	389.5	144.8	343.5
17.3333	271.7	229.5	392.3	356.9	193.8	340.9	222	396.1		170.7	467.5	195	203.9	305.8	400.7	151.5	337.1
17.35	271	236.7	388.1	339	199.3	362.8	248.7	376		178	487.1	193.4	198.2	308.6	396.1	149.5	327.7
17.3667	275	227.2	398.5	344	201.6	318.8	238.2	366.6		177.2	467.3	183.9	206.2	315.6	387.6	154.6	336.4
17.3833	283.8	233	401.9	352.8	188.2	329.2	243.3	371.7		180.5	485.4	188.2	198.4	297.8	381.8	152.6	336.3
17.4	270.9	226.9	396.5	354.8	192.8	340.1	241.7	365.8		179.5	488.7	193	209	306.5	411.3	154	345.5
17.4167	277.1	239.2	377.4	347.4	189.6	348.6	243.5	367.5		170.8	505.8	198.6	204.4	311.2	393.3	157.3	347.2
17.4333	273.3	229.5	387.9	359	190	354.9	220.1	369.7		167.5	523.6	201.1	207.4	309.6	401.4	153.7	345.5
17.45	269.6	232	379.2	398.6	193.4	337	233.2	378.1		178.5	512.1	203.1	214.3	321.3	402.1	150.5	331.9
17.4667	278.8	239.8	379.6	367.6	194.6	321.8	227.5	378.4		169.3	511.2	197.5	210.4	309.8	406.8	149	340.1
17.4833	284.2	241.8	400.8	371.5	189.9	316.9	222.4	377.9		177.7	524.1	201.1	205.6	312.6	401.1	150	340.7
17.5	281.9	229.6	386.1	357.8	194.2	327.2	231.2	381.4		167.2	509.8	210	218.3	307.6	402.8	151.8	347.8
17.5167	289.9	230.6	406.1	382.9	192.8	327.2	222.8	386.3		174.6	506.6	203.2	224.7	330.5	389	145.3	344.4
17.5333	291.8	234.2	425.1	357	191.5	342.7	228.9	390.4		173.6	493.4	199.3	218.2	318.9	404.1	152.5	328.8
17.55	273	233.2	446.7	343	178.8	337.2	225	381.6		173.7	529.4	201.7	209	326.5	400.2	151.7	338.7
17.5667	278.7	227.1	414.2	340.7	190	344.8	222.9	383		169.1	482	203.8	201.9	317.8	388.2	151	324
17.5833	272.6	219.5	407.8	360.2	191.4	334.3	215	399.9		170.8	495.7	195.8	208.8	319.5	387.7	151.6	331.2
17.6	271.2	226.6	422.6	339.3	203	327.1	218.8	379.8		181.2	495.7	196.2	210	317.5	390.9	154.9	339.2
17.6167	275.6	239.4	409.3	346.5	195.4	317.9	219.6	381		165.9	475.8	205.8	213.8	308.2	384.7	152	331.6
17.6333	267.6	227.7	421.8	339.5	186.9	323.6	224.3	366		173.9	480.9	189.1	206.2	322.4	390.8	152.5	336.6
17.65	269.7	224.4	414.2	337.3	197.6	348.8	231.7	368		172.4	479.9	187.4	219.1	310.6	385.4	151.8	363.4
17.6667	278.2	238.3	402.4	347.3	190.3	339.9	210.1	372.3		172.7	479.6	180.4	212.4	337.2	377.1	146.9	341.8
17.6833	279.8	236	392.6	363.5	205.3	301.9	218.6	375.3		174.2	470.1	193.1	207.7	313.3	382.5	143.6	340.9
17.7	276.5	231.7	408	366.3	197.3	297	245.5	387.7		187.3	478.9	182.9	196.3	313.3	399.5	152	341
17.7167	274	239.2	391.9	344.3	207.1	309.4	227.3	387.1		178	493.9	191	199.9	322.9	391.7	161.6	336.2
17.7333	266.6	241.4	388.3	346	194.1	305.4	218.1	375.1		183.7	483.4	203.6	192.8	321	395.7	157.9	336.9
17.75	273.7	234.8	404.5	374.9	187.9	298.1	218.2	393.7		169.2	501.4	194.2	202.8	307.8	378.5	152.2	349.6
17.7667	264.4	239.7	400	363.9	188.7	310.3	231.5	375.7		191.1	503.3	196.1	201.8	316	400.2	150.2	349.8
17.7833	261	247.5	391.1	374.4	197.2	302.4	212.9	383.6		173.2	511.5	199.3	199.5	318.3	383.3	158.1	353
17.8	263.3	245.1	389.7	363.5	189.3	315.9	230.6	382.3		182.2	518.2	198.8	202.3	304.4	399.8	150.6	338.9
17.8167	272.5	242.8	379.1	364.7	195.4	311.8	230.6	386.9		160.2	506.6	200	198.6	302.6	383.4	154.9	339.1
17.8333	268.6	231	396.7	355.3	192.1	316.4	228.4	387.2		168.6	468.6	194.5	213.1	321.8	400.9	152.2	339.5
17.85	289.2	225.3	387	373.7	191.6	317	225.3	386.1		172.5	507.9	202.8	199.6	320.7	385	145.9	333.1
17.8667	282	242.6	421.1	346.2	194.5	307.3	235.1	406.3		165.8	475.8	202.3	207.3	313	387	150.9	331.3
17.8833	273.9	233.4	403.8	331.4	190	322.8	227	391.2		171.4	480.6	202.3	209.1	308.4	411.3	151.7	343.5
17.9	282.5	228.4	390.6	332.5	186	314.4	234.5	382.9		165.3	467.9	202.2	212.9	327.7	393.1	150.2	331.1
17.9167	277.3	238.3	392.1	340.5	198.7	331.4	228.6	379.8		174.3	453.3	196.7	213.9	313.5	422	149.3	336.4
17.9333	293.3	233.6	379.7	329.6	196.4	324.1	218.1	407		167.1	467.4	195.2	206.7	325	395.3	153.3	338.6
17.95	288.5	233.1	377.2	332.7	202.2	322.1	210.5	383.3		164.7	450.5	198.9	207.2	311.3	396.9	155.2	346.7
17.9667	295.2	236.1	399.3	354.1	190.4	342.4	226.4	374.7		177.9	456.8	192.5	225.8	332.1	400.5	147	350.2
17.9833	277.8	249.5	433.2	334.6	193.9	323	218.9	383.1		175.3	467.2	191.1	209.9	328.1	406.8	152.9	340.5
18	275.6	231.6	429.3	358.5	197.5	332.8	242.2	379.5		177.7	459.9	189.5	208.4	313.8	400.3	146.9	351.6
18.0167	265.9	246.4	405.7	371.7	187.9	344.7	213.8	380.9		166.3	477.2	184.6	224.2	313.7	397.7	143.5	360
18.0333	267.9	237.3	403.9	352.9	191.3	324.4	229.4	379.3		169.7	479.1	187.8	211.7	327.2	372.9	152.7	338.6
18.05	275	235.7	406.4	341.5	199.3	315.4	244.1	387.4		170.7	483.9	190.6	209.8	318.8	390.5	152	356.8
18.0667	282.2	236	411	359.6	198.3	318.6	248.6	399.2		172.5	493.2	195.3	213.2	312.5	413.9	146.5	344.9
18.0833	278.5	223.1	408.1	356.7	187.7	306.6	239.4	387.5		182.7	494.6	184.3	207	317.6	404.9	151.3	353
18.1	273.9	231.9	410.5	333	196.7	312.8	237.1	379.1		180	490.2	196.3	208.1	315.6	399.9	142	326.8
18.1167	274.8	238.9	408	336.2	187.7	331.6	255	391.9		172.9	490.1	200	210	304.2	399.5	147.9	329.3
18.1333	282.6	235.3	414.9	331.2	186.8	298.2	238.2	385.4		167.1	493.1	209.6	205.2	299.5	404.9	148.6	338.2
18.15	279.4	228.6	410.7	349.1	197	301.6	249.2	394.3		175.1	490.5	190.2	213.6	321.1	392.4	152.4	334.2
18.1667	288.6	232.9	405.9	351.6	200.4	314.5	262.7	384.4		173.9	502.2	198.6	213.6	324.6	401.1	151.5	331.2
18.1833	278.6	235.1	420.1	338.1	189.9	303	252	398.1		178.9	484.3	201.2	211.9	310.8	410	152.6	328.7
18.2	299	234.7	440.6	346.1	196	304.8	242.4	386.2		171.2	496.3	201	215.7	320.2	405.5	152.7	329.7
18.2167	278.8	231.2	399.7	337.4	198.1	327.6	230.5	385.7		187.8	514.1	198	207.3	312.1	392.7	152	344.8
18.2333	276.9	238.3	404.1	342.8	202.5	332.8	236.4	379.6		173.8	472.8	189.9	229.9	304	372.8	152.8	338.7
18.25	259.3	239.7	400.4	366.3	188.6	331	229.4	391.3		170.9	482.9	198.6	211.2	304.5	395.7	157.3	349
18.2667	262	235.3	429.2	347	205.7	321.5	245.9	376.9		172.5	469	199.4	219.7	308.1	385.2	150.3	338.2
18.2833	280.2	236.7	411.5	347.7	193	314.1	240.7	378.2		172.4	471.7	194.4	215.8	311.5	381.5	150.5	349.6
18.3	282.3	230.7	392.3	366.7	190.5	327.5	239.6	385		182.3	464.6	192.5	209.9	308.1	387.1	148.5	345.8
18.3167	300.7	237.8	394.4	375.5	200	325.1	249.8	383.5		174.3	469	191.3	216.7	318.9	398.3	148.5	337.4
18.3333	285.3	245.5	388.5	358.9	199.8	319.4	241.2	360.9		178.8	466.6	186.2	265.8	313.9	389.3	159.4	345
18.35	297.3	237.6	391.8	360.7	196.5	329.4	247.2	373		172.9	469.7	180.3	273.7	315.5	399.2	147.9	353.1
18.3667	274.3	243.8	396.1	366.1	193	305	243.1	382.7		173.7	467.4	180.4	248.9	302.5	395.8	149	337.7
18.3833	291.7	237.1	412.9	344.1	182.9	319.5	248.1	377.5		182.8	486.8	180.3	251.3	310.3	391.8	145.1	340.9
18.4	280.1	230.3	418.6	333	190.9	321.5	249.3	371.6		178.1	468.5	200.5	234.2	308.4	412.1	162.4	338.1
18.4167	274.6	244.5	434.2	334.1	189.9	322.8	248	372.7		173.4	474	199.3	233.6	304.4	396.5	154	334.9
18.4333	269.7	240.6	404.3	318.5	204.8	326.7	256.2	368.9		175.3	470.2	203.1	235.5	312.9	400.8	154.9	331.9
18.45	273.3	231.9	409.8	335.4	192.1	322.2	248.9	384.9		175.1	475.9	196.9	225.1	324	382.2	155.8	332.5
18.4667	282	231.7	407.1	338.9	195.6	319.8	245.9	389.8		175.7	473	203.3	208.6	316.2	406.6	145.6	324.9
18.4833	281.9	233.5	411.6	345.2	192.3	327.5	254	390.7		165.7	501.9	205.5	207	318.5	394.7	150.6	339.1
18.5	286.1	225.9	397.1	364.2	191.5	323.4	246.2	382		183.7	501.3	186.7	213.7	333.9	396.6	153.5	338.5
18.5167	286.1	229.4	391.1	354.6	196.7	313.8	259.7	392.2		174.1	502.3	195.3	211.9	325.4	392.6	151.9	342.2
18.5333	275.4	225	430.2	359.4	198.1	323.1	244	369		188.4	498.8	195.4	203.5	318.8	403	152.3	349.2
18.55	284.5	235.5	380.7	353.4	199.2	325.6	247.1	383.3		175.4	525.9	205.3	211	338.1	393.2	154.5	338.5
18.5667	285.2	231.9	390.5	337.8	194.1	312.2	245	370.3		184.5	497.4	192.4	213.1	316.7	377.6	149.9	326.6
18.5833	280.6	236.3	403.9	341.6	194.8	323	243.2	394.3		177	488.8	196.6	215.4	319.2	383.6	153.6	338.3
18.6	291.5	233.8	419.2	381.1	194.6	314.2	247.2	399.5		181.9	482.1	188.8	222.7	310	401.1	159.8	334
18.6167	294.6	237.9	386.2	365.2	181.9	319.2	241.6	395.2		179.1	482.8	197.7	205.5	316.5	379.5	155.7	342.6
18.6333	295.5	231	384.7	361.1	185.4	323.4	252.4	399.5		169.4	480.7	194.8	220.2	303.3	384.8	165.1	336.8
18.65	289.9	235.2	410	370.6	202.6	294.9	236.7	384.7		182.1	475.9	196.2	218.8	308.8	387.3	160.9	320.7
18.6667	288.8	231.6	433	363.4	197	308.5	237	381.2		175.1	462.8	204.6	217.2	322.3	376.2	153.6	334.3
18.6833	284.5	232.6	392.6	349.4	191.7	300	243.7	400.8		173.1	474.2	196.9	216.3	326.1	379.6	148.2	353.3
18.7	293.1	236.5	391.9	345.2	211.7	294.9	232.1	398		172.2	465.8	195	216	303.5	400.4	145	347.7
18.7167	289.6	251.3	389.6	338.2	194	303.2	237.2	410.7		174.5	473.6	208.5	218.8	304.8	372.5	162.2	338.9
18.7333	274.4	235.4	393	328.2	185.3	299.1	247.8	398.9		171.2	474.1	203.8	218.5	307.7	395.1	158.6	333.3
18.75	278.8	236.7	433.9	343.9	205.5	298.5	233.9	392.7		163.6	466.9	203.3	215.6	322.9	391.1	148.5	329.8
18.7667	291.9	240.7	432.5	354.4	192.5	301.3	223.3	404.5		170.1	475.8	205.3	215.6	318.1	384	162	337.1
18.7833	287.1	244.1	438.8	366.6	190.6	308.3	236.5	392.3		164.1	485.3	192.9	220.3	323.2	397.2	165.3	321.4
18.8	283.4	243.9	410.7	364.8	198.3	312.4	250	380.3		179.9	462.2	194.7	210.1	319.7	398.9	158.6	332.9
18.8167	293.2	237.3	385.1	367.8	209.4	328.1	237.3	374.9		175.2	483.7	195.9	212.2	319.8	397.2	149.6	340.8
18.8333	291.3	244.5	394.7	374.9	200.9	327.1	226	381.6		170.3	468.7	196.6	213.7	303.5	385.7	150.4	339.1
18.85	289.4	234.9	405.2	360.3	189.3	312.1	233.9	388.8		163.9	493.7	211.5	215.7	319.6	400.3	150.6	326.3
18.8667	287.8	238.7	391.6	351.4	194.8	325.1	248.1	383.5		169.6	489.8	203.8	218.7	304.3	387.8	152	333.6
18.8833	302.9	232.6	406.7	362	200.5	333.1	247.6	385		172.2	488.8	207.7	212.9	314.5	393.6	151	334.5
18.9	294.2	233.6	410.1	384.9	198.1	317	229.5	397		171.9	489.8	196.2	219.4	325	390.6	159.7	325.6
18.9167	294.1	235.5	413.9	416.5	198.4	331	236.2	407.7		183.8	487.7	195.1	208.5	323.7	393.5	152.7	343.4
18.9333	286.3	240.9	379.5	389.6	206.5	327.6	238.5	413.7		176	482	199.7	209.9	308.1	382.7	157	337.2
18.95	293.5	233.7	396.7	381.1	196.7	317	231.7	381.8		173.4	495.1	195.4	212	313.7	390.6	167.4	319.1
18.9667	281.7	237.3	394.3	381	192.9	315.4	231.9	393.8		169.2	482.7	193.3	213.5	315.6	391.9	165.1	349.6
18.9833	275.6	234	396.9	355.6	202.4	315.1	226	393.7		183.6	476.4	184.9	218	320.1	409.8	156.6	339.3
19	273	237.1	396.1	344.7	192	326.1	228.5	387.7		183.1	473.4	189.4	213.6	313.5	409.9	152.3	338.5
19.0167	285.2	248.8	380.9	366	188.8	322	230.5	394.1		173.6	468.2	187.8	215.3	309.3	391.6	146.1	345.1
19.0333	276.6	234.1	395.3	362.9	184.1	316.6	249.6	367.8		177.2	466.1	192.7	221.2	293.4	410.3	156.2	332
19.05	294.5	229.6	415.1	369.7	195.3	319.4	236.6	394.8		167.8	459.7	185.8	208.7	315.7	389.3	158.3	327.6
19.0667	274.4	226.9	454.4	367	192	327.7	228	422.8		184.7	484.3	194	209.7	297.7	383.5	150.8	331.5
19.0833	288.7	232.9	431.2	355.5	194.9	308.2	235.1	413.4		182.8	460.5	205.2	217.3	308.8	391.8	150	329.3
19.1	287.6	227.5	418.6	379	191.9	306.9	228.7	402.7		184.3	483.8	204.2	209.9	313	412	153	320.7
19.1167	282.6	239.4	402.6	361.6	189	316.9	243.1	386.3		179.5	491.1	203.9	215.1	309.5	408.7	151	347.5
19.1333	291.8	232.3	399.7	367.8	188.9	307.6	234.9	391.6		166.1	467.3	204.4	212.1	319	396.4	157.3	335.1
19.15	290.9	235.1	400.3	358.2	197.2	312.1	233.1	394.1		181.3	490.6	215.2	216.9	320.5	370.7	162.6	338.1
19.1667	272.7	235.7	405.3	365.9	196.8	301.3	221.3	403.6		167.8	486.1	199.7	205.8	325.6	386	153.3	333
19.1833	274	233.9	396	352	189.8	309.3	236.7	404.1		168.2	473.1	194.2	205.9	319.3	370.9	147.7	337.1
19.2	266.2	238.4	393.4	354.1	189.8	310.2	231	398		182.9	483.3	206.5	216.4	312.5	396.9	152	334.2
19.2167	281.3	237	409.2	360.9	188.6	317.6	228.9	387.6		173.2	485.9	195.1	216.8	312.9	387.5	159.7	328.2
19.2333	279.5	229	387.4	362.7	185.7	320.1	243.4	371.8		168.7	483.3	192	207	313.2	388.5	148.9	340.2
19.25	289.4	229.6	399	341	183	302.7	239.7	388.6		173.4	506	203.7	208.4	315.7	385.2	148.9	341.3
19.2667	287.2	234.3	427.1	354.9	203.6	309.4	239	390		177.2	465.6	199.8	209.5	325.3	397.5	154.3	349
19.2833	288.3	233.5	419.3	360.4	196.5	321.6	247.8	391.1		171.3	490	196.3	201.6	324.1	386.9	146.5	339.5
19.3	293.2	244.5	398.7	361.8	199.5	311	246.9	390.5		186.4	485.5	189.8	206.7	318.4	379	154.1	341.5
19.3167	301.2	250	389.1	362.4	190.8	327.4	246.3	401.3		173.6	485.9	195	210.6	318.3	388.8	159.2	339.7
19.3333	278.1	230.5	398.7	356.1	197.2	340.2	259.9	380.8		171.4	477.3	196.9	204.3	313.7	380.9	160.6	337
19.35	283.9	238.8	420	359.9	191.8	352.1	239.5	383.9		177	461.4	197.3	218.3	309.7	399.5	156.8	340
19.3667	296.9	233.4	421.2	352.4	199.9	309.1	245.6	387.5		168.3	478.4	202.8	211.8	336.6	393.8	152.9	335.9
19.3833	274.3	237	394.5	346	199.2	327.7	251.3	378.7		176.1	453.6	191.2	213.8	324.3	397.3	151.1	348.4
19.4	269.4	235.5	388.3	332	193.2	318.7	236.7	379.8		167.9	463.2	195.8	209.9	314.8	390.2	148.4	347.5
19.4167	278.8	239.4	378.1	349.1	188.6	330.9	230.6	380.5		177.3	460.6	204.9	210.5	316.5	382	148.8	343.5
19.4333	258.1	233.5	435.6	356.7	190.9	307.2	246.8	395.5		161.6	461.4	202.6	219	322.2	387.2	147.7	352.5
19.45	271	227.4	413.9	343.2	189.5	325	235.7	388.5		166.5	477.4	209.2	214.2	303.7	388.4	152.3	338.8
19.4667	278.3	230.2	427	358.1	196.5	307.6	238.7	398.4		179.9	464.9	199.2	215.6	305	387.7	146	345.3
19.4833	272.7	236.7	418.8	369.1	188.6	306.3	237.4	389.9		174	470.2	196.7	212.5	310.4	391.1	149.1	354
19.5	283.6	236.2	429.4	354.8	188.6	316.5	234.6	398.3		184.4	471.3	197.2	215.2	303.9	388.9	156.4	335.1
19.5167	272.7	237.1	391.7	353.9	192.7	313.8	230.7	406.8		169.8	487.5	199.4	210.5	321.4	397.7	153.7	318.7
19.5333	284.5	244.2	413.8	358.2	195.2	330.6	235.3	397.7		172.5	492	200.6	209.6	328.7	383	162.6	318.1
19.55	286.2	237	394.7	345.6	198.2	338.2	234.9	390		182.1	482.1	201.8	206.9	324.8	389.7	152.5	331.9
19.5667	275	239	412.8	362	193.3	326.8	229.9	398.7		170.9	488.5	196.9	213.8	317.1	380	156.2	317
19.5833	285.5	246.6	402.3	364.1	197.7	321.5	231.1	394.7		173.5	477.8	200	207.9	328.2	389.5	152.3	337.5
19.6	292.3	233.6	397.7	344.8	194.1	315.7	242.4	395.7		167.9	495.2	193.1	213.4	313.3	379.7	153.1	343.8
19.6167	296.8	231.3	392.9	345.7	198	323.2	236.9	396.9		178.4	493.4	209.2	208.7	321.5	376.3	154.6	325.8
19.6333	294	234.6	393.7	347.3	184.6	330.6	226.5	391.8		187	500.2	200.9	211.6	323	382.1	156.7	330.4
19.65	276.2	231	428.1	337.8	197.3	301.3	228.2	389.3		184.6	502	198.1	206.4	323.4	365.9	153.4	331.5
19.6667	290.1	234.2	443.3	339.8	189.5	310.4	223.2	389.8		192.3	491.3	191	217.3	318.3	395.8	153.4	346
19.6833	282.8	240	406.4	335	193.1	319.5	230.7	399.8		184.1	486.9	195.5	220.6	335.2	412.8	146.7	332.6
19.7	289.5	232.4	399.1	358.4	189	322.3	232.5	404		180.6	457.5	197.9	214.2	320	389.5	153.8	332.8
19.7167	288.8	243.9	409.9	355	194.3	328.7	225.9	394.6		182.1	466.9	187.9	211	295.2	381.7	156.2	346.3
19.7333	301.8	234.5	405.4	369	194	317.8	220.9	387.1		186.2	461.3	193	215.8	337.9	385.9	158.1	336.5
19.75	302.5	239.9	387.8	360	191.7	318.7	231.2	398.2		182.4	453.8	193.9	224.4	321	383.9	157.3	350.4
19.7667	291.1	242.2	411.1	369.7	187.8	322.6	253.8	385.3		177.7	443.1	197	207.9	314.2	400.6	154	342.5
19.7833	290.3	243.4	421.8	379.7	189	345.5	253.9	394.1		171.4	457.3	189.5	219.8	317.4	391.5	152.4	342
19.8	284.8	247.3	407	345.8	193.4	325.9	259.3	383.8		174	471.3	195.6	216.3	328.4	397.6	143.8	351.7
19.8167	293.8	242	399.9	372.9	189.3	316.7	254	394.3		181.5	459.6	185.4	215.9	311.2	379.8	152.7	346.6
19.8333	307.1	231.9	407.8	354.8	199.2	322.8	258.8	381.5		167.1	459.8	185.6	211.8	318.8	400.7	149.7	336.8
19.85	282.9	242.2	422.8	336.1	193.5	318.3	277.5	374		168	472.5	206.3	208.6	330.3	385.3	158.2	334.9
19.8667	291.7	230.3	423.6	341.4	198.1	314.6	252.7	396.3		174.4	483.6	199.1	206.8	319.1	400.2	157.5	339.6
19.8833	277	240.9	387.7	344.8	204.3	311	257.9	389.4		178	489.1	202.2	217.3	315.2	395.6	161.7	338.3
19.9	292.5	233.8	402.4	367.8	196.5	326.4	237.7	402.5		175.6	481.5	193.9	215.9	325.7	404.2	149.2	344
19.9167	285.6	242.9	401.6	357.2	204.6	315.4	227.3	400.8		176.6	475.7	199.8	216	311.6	400.4	153.5	328.7
19.9333	298.9	245.5	406.9	344.4	194.2	305.1	239.8	396.4		170	489.5	201.5	211.3	318.4	387.2	156.3	350.2
19.95	289.9	236.3	415.1	348.4	195.7	317.8	242.9	394.4		170.5	480.2	201.8	217.1	310.5	383.8	160.8	344.8
19.9667	295.6	231.4	417.8	355.9	185.7	318	234.5	384.5		181.4	481.7	200.3	217.9	318.2	374.4	150.9	329.9
19.9833	289.7	237.9	421.9	368	188.6	311.4	229.8	404.9		167.4	475.3	198.4	211.2	322.9	378.8	139.9	341.4
20	289.7	239	405.8	383	193.2	328.3	217.8	374.9		183.6	475.4	204.2	210.8	309.3	372.8	156	350
20.0167	286.9	239.5	395.7	377.8	198.7	321.4	235	395.6		172.9	484	203.8	206.1	309.2	387.7	156.4	363
20.0333	289.4	242.3	410.2	365.2	197.9	329	228.1	393.9		175.1	482.3	205.9	229.1	317.8	374.4	154.6	354.4
20.05	284.2	232.3	422.2	360.6	190.3	325.7	237.5	413.9		178.4	476	191.7	234.2	317.5	385.5	157.9	352.4
20.0667	280.9	230.9	460.9	352.8	205.6	333.1	232.5	387.2		177	469.7	205.3	224.6	329.6	376.4	149.4	352.4
20.0833	290.4	232.9	429.1	358	200.5	319.6	222	394.3		180.5	464.5	194	213.2	313.6	378	149	340
20.1	296.2	235.9	407.4	347.8	195.6	311.1	248.7	391.2		186.3	466.4	196.4	220	322.3	380.2	150.9	343.9
20.1167	291.7	242.9	401.5	350.8	198.3	322.6	238.2	387.5		180.9	449.2	197.3	207.9	321	376.3	157.8	353.2
20.1333	298	243.3	402.8	339	198.3	320.7	243.3	380.2		174.3	462.3	206.3	207.9	319.4	384.7	161.1	340.4
20.15	289.9	247.4	417	335.6	192.4	324.8	241.7	389		173.4	457.9	210	206.4	333.3	397.2	158.2	357.6
20.1667	294.3	239	391.4	362.3	191.3	332.1	243.5	378.8		174.8	450.7	192.1	211.5	326.2	380.4	151.2	343.4
20.1833	295.7	234.1	399.9	368.8	187.9	320.4	220.1	386.5		176.1	447.4	193.7	215.9	317.4	382.7	157.3	331.6
20.2	286.9	235.3	392.7	388.3	199.8	315.1	233.2	385.9		179.4	463.5	186.5	215.1	321.8	402	149.8	324.2
20.2167	300.6	231.1	379.9	392.6	195.7	324.1	227.5	392.5		194.1	460.2	201	218.4	326.9	405.1	151.8	339.7
20.2333	278.8	228.2	401.8	382	198.4	323.7	222.4	398		174	459.6	177.7	217.2	316.9	397.6	154.7	341.1
20.25	266.5	231.1	420.9	389.7	199.1	303.3	231.2	385.1		184.5	466.8	185	205.5	329.2	407.2	153.7	347.3
20.2667	274.7	243	414.1	364.7	196.8	300.2	222.8	396.8		186.8	466.8	197	211.9	332.4	391.5	148	340.6
20.2833	262.6	232.1	398.4	371.8	196.5	307.9	228.9	399.3		175.7	479	182.9	214.1	314.8	377.5	157.1	347.9
20.3	280.6	239.9	420.1	368	197.4	312.6	225	409.8		195.5	473.6	186.7	221.4	323.9	372.3	149.9	345.2
20.3167	283.7	237.7	424.9	358.3	190.3	311.7	222.9	401.5		175.6	473.1	193	212.1	315.9	378.2	154	347.9
20.3333	278.6	227.7	417	368.3	197.1	316.3	215	400.2		187.1	479.8	193.6	211.7	313.1	401.6	162.6	350.2
20.35	290.2	240.1	405.8	355	188.7	314.3	218.8	403		187.5	484.3	201.4	216.4	318	397.7	159.8	341.1
20.3667	287.7	237.4	380	372.3	190.7	305.9	219.6	400.5		176.1	482.6	200.2	212.3	314	387.2	147.6	347.1
20.3833	279.6	245.4	397	360	186.6	321.9	224.3	398.2		176.8	464.6	195.1	217.7	312.1	402.1	146.7	341.3
20.4	283.4	242.4	424.4	367.5	195.1	327	231.7	389		185.5	481.2	203.9	208.6	308.5	376.3	153.4	358.6
20.4167	285.4	235.7	422.8	357.1	193.9	325	210.1	382.4		191.6	470.1	202.1	212.2	316.4	385	157.6	344.6
20.4333	275.9	230.8	398.9	361.2	197	328.1	218.6	398.2		181.7	491.3	201.1	225.1	330.5	368	155.5	345.7
20.45	270	236.9	394.2	384.4	200.5	339.1	245.5	400.7		177.9	466	207.9	215.4	327.4	377.3	157.6	346
20.4667	281.6	234.3	393.6	375.4	198.3	329.7	227.3	394.8		174.5	459.8	196.8	206.1	330.1	368.2	152.3	341.5
20.4833	283.7	238.4	411.3	365	199.6	313.6	218.1	397.1		168.1	467.1	203.7	217.3	312	371.4	157.2	349.2
20.5	278.9	237.9	404.6	370.4	207.6	327.2	218.2	413.6		179.2	471.5	200.1	207.6	324.1	383.9	153.2	348.2
20.5167	269.9	239.3	391.9	370.5	193.9	321.2	231.5	396.4		183.6	471.8	201.5	226.2	312	374.8	162	348.2
20.5333	263.3	243.7	396.6	371	194	312.3	212.9	385.8		176.6	453.1	203.1	210	326.8	365.4	163.5	362
20.55	267.6	245.3	396.9	348.6	197.2	322.5	230.6	398.6		175.8	451.7	196.4	205	319.9	388.8	149.9	340.3
20.5667	268.8	236.4	409.2	368.8	191.3	311.3	230.6	397.9		177	444.6	193.4	217.3	309.9	395.1	159	343.4
20.5833	270.7	236.1	414.7	369.4	187.5	310	228.4	405.2		181.3	462.2	192.3	217.1	317.1	379.8	155.5	361.3
20.6	284.3	234.7	418.8	378.5	192.3	317.9	225.3	409.2		180.9	440	197.4	208.8	319	376.2	158.4	353.2
20.6167	262.8	233.9	394.1	376.7	191	316.2	235.1	399.4		185.6	453.5	188.8	212.2	329.7	380.3	154.9	356.3
20.6333	268.8	238.1	391.3	355.7	188.3	326.7	227	394.7		176.2	456.4	185.4	212.9	320.2	372.8	148.1	361.8
20.65	267.1	230.7	409.5	341.8	195.2	319.9	234.5	399		182.8	471.4	185.7	211.5	341.6	384.7	152.9	346.6
20.6667	268	230.6	420.8	350.2	194.4	322.7	228.6	389		174.3	462.9	209.8	213.5	336.8	367.6	152.4	348.5
20.6833	287.1	230	401.1	387.4	204.6	326.8	218.1	392.5		183.1	481.6	195.1	214.5	324.2	381.8	157	340.7
20.7	282.9	237.2	390.8	369.9	198.6	335.1	210.5	401.7		171.1	467	214.7	218.9	318.9	376.8	148.6	347
20.7167	286.5	236.7	391.2	400.5	196.2	321.1	226.4	393.1		178.2	479.1	196.9	214.9	311.9	375	149.8	335.1
20.7333	283.7	237.1	397.6	382.1	189.7	316.7	218.9	405.9		165.6	476.8	196.1	212.8	322.9	372.8	162.9	328.8
20.75	290.4	246.9	416.4	388	195.1	329.1	242.2	384.6		187.4	479.2	197.5	220	316.7	394.1	150.2	344.4
20.7667	266.2	239.6	407	366.2	193.6	319.7	213.8	384		168.5	481.4	210.1	214.7	313.5	381.5	150.6	341.7
20.7833	262.8	235.6	398.2	383.9	188.9	328.6	229.4	398		167.3	466.1	199.9	213.9	317.6	402.4	148.8	356.2
20.8	273.2	229.6	402	390.8	190.4	328.3	242.6	391.4		171.4	474.4	200.5	216.9	311	381.6	154.4	344.8
20.8167	278.7	243.8	404.8	362.4	189.7	313.8	244.1	412.5		167.4	466.3	194.9	216.7	337.8	375.5	148.6	342.6
20.8333	288.8	240.4	408.7	356.2	191.6	308.5	248.6	380.2		174.3	453.3	207.6	222.7	325.3	368	153.5	355.1
20.85	284.8	238.4	407.7	360.6	193.3	302.7	239.4	378.5		163.3	457	206.4	220.5	317.9	388.8	150.4	362.1
20.8667	277.9	234.6	408.6	363.1	193.6	297.9	237.1	396		183.8	475.2	215.8	220.9	347.8	392.1	152.4	349.9
20.8833	268.7	242.9	399.1	367	192.1	306.9	255	379.1		184.3	467.4	197.7	212.8	328	371.3	146.8	353.5
20.9	275.8	235.7	394	383.8	202.1	313.2	238.2	387.7		182.9	456.7	188.2	213.9	320.4	381.7	153.8	340.5
20.9167	278.2	242.9	407.8	378.2	196.7	314.9	249.2	409		175	464	183.3	228.6	328.5	372.7	140.9	344.9
20.9333	275.3	237.2	397	389.8	201.3	326.5	262.7	387.7		186	479.4	190.5	211.9	325.2	365.6	153.6	325.4
20.95	276.9	233.5	404.8	367.9	197.6	323.6	252	378.1		187.9	470.3	188.2	201.5	321	381.9	151	331.8
20.9667	285.4	246.3	406.1	382.4	196.8	325.6	242.4	390.7		176.7	484.8	211.7	212	319.9	398.1	155.7	346.2
20.9833	280.4	244.2	385.3	393.9	186.4	321.7	230.5	402.9		179.2	470.4	187.4	199.5	342.5	376.1	145.6	334.9
21	272.2	232.2	383.8	377	191.8	312	236.4	404.6		180.9	477.4	195.1	205	325.2	385.3	156.8	352
21.0167	278.2	224.8	397.7	384.5	188.9	307.4	229.4	405.4		176.6	485.3	193.4	204.1	352.2	365.3	148.6	337.6
21.0333	277	231.5	391.1	353.4	191.5	318.4	245.9	400.2		185.6	494.6	193.4	214	325	385	156.5	352.1
21.05	276.9	231.5	418.1	367.6	191.1	305	240.7	394.9		168.4	475.4	205.6	215.9	326.6	383.3	151.6	354.1
21.0667	282.6	235.9	419.3	386.9	193.7	309.8	239.6	397.5		176.1	474.1	198.2	215.7	323.6	381.4	155.1	348.8
21.0833	279	227.3	388.2	352.8	202.3	328	249.8	392.7		172.9	473.5	200.4	213.9	341.2	379.7	155.4	364
21.1	288.4	243.7	386.6	350	204	317.4	241.2	384.3		191	487.9	189.7	213.8	310.8	377.9	154.8	354.1
21.1167	280.4	226.4	399.3	361	192.7	327.3	247.2	396		175.5	476	197.8	203.2	314.1	369.9	152.4	341.8
21.1333	277	247	394.5	366.3	195.1	319.6	243.1	389.2		186.2	463	198.5	215.6	311.1	391.9	151.2	349.8
21.15	264.6	241.8	400.5	378.4	194.8	332.9	248.1	378.1		177.2	472.1	194.1	220.9	315.3	365.8	150.4	346.9
21.1667	293.3	235.5	388.5	385.1	196.9	329.9	249.3	383.1		183.6	462.9	207.8	231.1	314.4	377.5	150.2	348
21.1833	286.5	227.7	395.6	369.5	192.7	320.7	248	372.7		181.4	459.1	203.9	218.9	313	367.5	153.7	337
21.2	288.5	224.1	418	401.5	192	330.4	256.2	374.2		191.5	444.8	195.1	220.9	324.4	384.2	155	346.5
21.2167	282.6	240.5	399.6	376.4	193.7	311.6	248.9	382		167.8	450.6	194.7	220.1	328.9	386.6	162.6	350.9
21.2333	274.4	244.8	405	362.3	197.9	314.2	245.9	389		181.4	462.6	189.1	217.4	354.8	363.8	145.1	352.6
21.25	284.3	240.3	413.9	370.6	197.1	339.9	254	379		191.1	459.2	191.8	222.5	322.9	369.9	149.6	342.5
21.2667	289.7	236.8	417	356	190.9	324.8	246.2	402.9		183.8	449.2	183.8	218.6	315.1	390.4	154.6	346.7
21.2833	272.4	240.4	385	361.1	197.1	339	259.7	382		177.5	449.3	191.1	224.1	326.2	407.2	151.1	346.8
21.3	280.1	233.4	422.5	367.3	188	320.4	244	388.6		179.8	453.9	190.1	217.9	322	373.2	163.9	343.2
21.3167	285.5	239	428.2	366.3	197	310.7	247.1	397.2		178.3	470.1	203.1	222.2	328.6	381.2	151.8	354.4
21.3333	282.1	244.8	396.4	358.1	179.7	314.2	245	411		178.2	481.6	198	202.6	332.1	374.7	149.7	357.3
21.35	288.9	241.2	399.9	348.8	191.1	329	243.2	404.5		176.4	486.6	190.4	206.9	332.6	395.8	151.4	361.8
21.3667	281.7	243.2	401.3	345.4	203.8	333.3	247.2	411.3		171.6	487.4	198.9	211.7	317.9	404.5	157.3	349
21.3833	289	229.6	426	351.6	210	321.7	241.6	384.1		179.5	471	204.9	217.5	341	396.5	158.3	350.6
21.4	269	246.8	396.3	358.3	194.6	312.9	252.4	400.8		172.8	467.8	194.7	210.7	321	375.5	148.8	337.6
21.4167	265.8	233.3	376.3	360.5	192.3	330	236.7	397.6		184	470.4	197	213.8	328.3	362.3	148.8	339
21.4333	271.8	239.7	405.5	382.6	197.8	336.5	237	385.2		178.7	469.8	194.6	220.5	320	386	142.1	331
21.45	284.6	231	435.2	382.1	192.8	324	243.7	388.5		182.6	483.1	204.8	210.9	316.4	380.4	149.3	360.8
21.4667	284.3	236.1	406.8	374.2	189.5	307.4	232.1	390.3		179.6	485.8	194.7	209.7	321.4	367.9	144	343.6
21.4833	275.6	231.6	396.6	365	200.4	300.8	237.2	401.7		175.1	484.2	198.8	212.3	322.3	388	149.9	339.8
21.5	278.5	232.1	389.6	357.3	192.6	324.5	247.8	393.8		174.6	468.8	198.7	210.4	320.3	389	146.4	355.8
21.5167	272.4	225.7	383.6	364.5	196.5	309.6	233.9	393.5		184.1	482.6	201.8	206.3	330	384.6	156.7	369.6
21.5333	265.9	233.6	388.5	353	202.9	325.9	223.3	403.2		180.7	454	195.8	211.2	328.3	384.7	151.9	359.6
21.55	265.5	232.5	401.4	377.9	195.2	326.5	236.5	393.7		189.8	456.9	195.2	211.6	324.5	379.6	156.3	364.3
21.5667	274.5	234.2	442.1	358.2	201.4	318.6	250	399.8		174.4	459.3	208.4	221.6	316	389.3	153.3	355.6
21.5833	287	241.6	448.3	350.9	193.7	312.8	237.3	391		180.5	452.3	202.2	210.6	317.1	382	162.1	351.3
21.6	276.1	244.4	384.4	354.8	201.2	310.4	226	400.8		164	458.9	186.4	208.1	335.4	378.1	149.9	347.4
21.6167	278.4	243.3	385	356.8	194.5	314.8	233.9	415.9		174	442.1	191.6	216.2	318.7	376.6	142.9	342.1
21.6333	276.5	237	406.8	373.3	199.1	315.8	248.1	409.2		172.2	451	196	213	325.1	377	152.9	369.6
21.65	278.2	243.8	418	376.5	186.9	312.6	247.6	408.8		172.1	456	188.6	210.7	331.7	381.5	161.8	357.1
21.6667	274.9	249.6	405.4	360.8	196.4	309	229.5	400		176.6	450.6	185.7	215.4	309.6	393.1	157.1	341.1
21.6833	291.3	230.8	397.7	362.4	200.4	326.2	236.2	399.5		181.8	484.2	194.1	214.2	328.8	370.4	161.3	347.1
21.7	284.5	227.5	398.2	362	187.8	309.5	238.5	400		184.4	462.2	193.8	214.5	321.6	392.9	153.9	343.7
21.7167	279.2	233.7	414.5	361.8	192.1	318.6	231.7	397.4		180.5	466.5	194.9	219.5	339.2	383.4	151.2	338.8
21.7333	290.5	241.4	417.7	365	202.1	324.7	231.9	405.6		179.8	489.5	202.5	217.2	321.3	389.8	146.3	350.8
21.75	277.4	246	414.8	359.3	198.4	333.9	226	406.4		184.4	484.5	197.9	218.9	319.2	398.7	151.1	355.6
21.7667	288	237.4	387.3	382.2	178.9	314.6	228.5	401.3		177.9	468.3	201.8	217	332.8	384.1	158	353.9
21.7833	281.4	229.6	397	345.3	197.8	320.3	230.5	415.3		181.5	481.5	197.2	219.2	327.8	376.6	158.3	358.3
21.8	278.5	226.9	397.1	352.8	197.4	322	249.6	405.4		177.2	483.2	208	218.1	327.6	379.4	156.6	354.4
21.8167	276.3	237.3	421.9	384.8	199.3	325.9	236.6	409.1		193.8	481	204.4	201.5	321.9	373.8	155.7	340.4
21.8333	306.6	228.5	443	363.1	197.4	326.7	228	397.9		188.6	485	204.5	213.5	324.9	371.5	157.1	347.6
21.85	299.2	238.2	411.9	353.8	195.6	331.7	235.1	404.4		188.6	488.6	200.3	203.8	334.5	372.6	157.7	359.4
21.8667	293.2	232.1	394.8	355.1	190.8	325	228.7	403.8		188.1	489.8	200.9	221.5	335.7	370.9	155.5	350.9
21.8833	293.9	240.3	393	380.5	202.6	318.4	243.1	417.8		182	494.8	203.6	217.8	313.3	363.4	152.1	356.1
21.9	280.6	237.2	387.6	364.9	189.6	316.3	234.9	405.7		177.7	486.7	202.1	217.1	319	384.5	145.8	338.9
21.9167	278.7	231.7	389.9	383.1	194.2	313.2	233.1	401.3		172.9	450.1	203.4	208.7	316.4	381.2	156.6	352.4
21.9333	282.7	230.1	391.5	344.9	202.1	311.7	221.3	402		182.2	463.6	197.7	221.8	338.9	379.3	149.3	338.2
21.95	289.8	236.4	405.8	372	202.1	330.5	236.7	393.1		174.7	436	185.5	210.9	307.4	374.8	156.4	346.3
21.9667	286.6	235.9	416.6	391.7	201.1	314	231	397		175.4	431	200.1	209.8	322.3	369.5	154.1	343.5
21.9833	271	225.4	396.2	369.3	200.7	322.7	228.9	403.8		192.6	447.9	192.9	218.4	316.1	388.7	153.4	343.7
22	280.9	231.9	391.9	366.2	199.8	307.1	243.4	412.7		182.8	452.4	193.4	224.5	333.3	374	156.9	342.9
22.0167	291.5	235.3	379.4	365.9	205.4	310.1	239.7	401.3		189.5	469	185.4	217.7	320.1	370	155.9	348.6
22.0333	289.4	227.5	379.1	342.7	210.2	325.2	239	404.7		194.1	458.8	199.7	218.3	328.7	372.8	154	358.8
22.05	285.8	234.3	420.8	337.2	195.9	314.8	247.8	402.2		200.9	438	194.7	231.2	316.2	381.4	160.9	359
22.0667	281.1	247.8	438.8	358.3	196.9	312.5	246.9	418.4		194.7	449.8	203.9	228.3	313.8	384.1	142.6	358
22.0833	294.7	233.8	414.6	372.9	190.9	303.2	246.3	405.8		193	465	195.9	218.3	308.2	368	151.8	349.6
22.1	277.3	236.7	405.3	353.1	193.1	312.2	259.9	404.8		188.5	455.9	196.8	210	340.7	354.1	146.2	362.7
22.1167	295.4	245.6	397	358.5	197.2	329.8	239.5	397.9		187.5	456.1	201.3	217.7	326.5	365.6	149.7	358
22.1333	295.1	237	404.2	352.2	185.7	305.5	245.6	406.6		182.5	464.8	203.2	214.6	321.2	371.2	153.6	350.2
22.15	286.5	232.4	398.6	353.3	185.9	311.3	251.3	388.5		177.9	446.8	200.4	231.1	319.8	363.3	166.7	377.1
22.1667	269.1	244.5	383.3	393.9	201.3	313.1	236.7	412.9		177.1	472.9	202.7	229.2	318.9	362.7	153.2	356.9
22.1833	282.2	236.8	403.4	380.6	197.4	312.8	230.6	401.8		172	459.2	198.3	277.2	334.8	376.6	156.5	359.3
22.2	279.6	239.3	399	414.6	199.6	317.1	246.8	396.9		186.1	475.6	210	250.3	310.5	371.3	159.3	351.7
22.2167	275.3	243.7	392.4	383.3	191.5	319.7	235.7	399.8		175.2	456.4	197.5	238.6	332.4	371	156.9	336.5
22.2333	278.3	225.3	375.1	396.7	195.2	330.1	238.7	396		181.1	466.3	192.7	241.3	320.6	367.1	165.3	346
22.25	284.2	237.3	381.6	392.1	192.3	327.1	237.4	392.8		176.6	456.5	192	231.8	320.7	372	149.9	353.8
22.2667	286.2	238.9	420.4	365.9	203.6	330.9	234.6	407.6		181.8	475.3	199.9	231.7	314.4	373.5	150.7	356.9
22.2833	274.4	235.2	435.2	356.2	203.3	317.6	230.7	395.1		174.4	466.6	186.6	230.2	310.3	367.3	150.4	361
22.3	290.1	239.6	418.8	353.6	198	336.8	235.3	420.4		176.5	451.7	195.8	220	319.3	377.1	153.3	351.7
22.3167	282.8	244.5	390.2	358.5	201.9	324.2	234.9	414		187.4	459.7	200.7	221.4	317.1	383.6	143.5	351.4
22.3333	285.7	239.3	394.5	358.6	197.2	321.7	229.9	406.9		182.5	460.7	200	227.5	330.1	372.9	150.1	344.6
22.35	289.5	237.7	390.5	356.6	204	334.4	231.1	401.5		181.5	453.1	197.6	211.9	330.4	373.8	159	349.1
22.3667	294	236.4	418	370.9	193	325.1	242.4	377.5		182.6	455.2	201.4	218.9	309.1	371	157.1	353.2
22.3833	306.8	230.8	401.4	352.3	190.1	322.5	236.9	410.3		182.7	467.3	192.4	210.7	332.6	363.4	171.8	337.5
22.4	305.2	236	383.9	365.6	199.3	298.8	226.5	413.7		178.9	452.4	208.9	212.6	312.3	370.7	156.4	349
22.4167	302.1	234.3	407.3	359.4	201.7	328.4	228.2	412.8		175.8	456.7	203.2	211.4	311.5	382	155.7	345.6
22.4333	306.5	236.8	405.6	398.6	198	314.1	223.2	419.8		180.3	457.4	191.1	214.1	324.5	384	166.3	346.6
22.45	305.1	243.4	404.2	387.1	190.4	311.4	230.7	414.8		166.1	467.2	194.6	215.8	325.1	382.9	148.1	340.4
22.4667	297.2	239.1	403	381.9	202.6	305.4	232.5	409.6		179.4	455.1	202.2	218.5	325.5	387.1	161.5	345.6
22.4833	297.4	238.7	391	385.1	199.3	299	225.9	413.2		180	457.6	198.4	222.3	326.7	370.6	154.1	337.9
22.5	296.3	236.1	423	356.9	195.6	311.2	220.9	407.7		181.9	462.3	197.2	217.6	313.9	368.8	154.2	356.8
22.5167	279.8	235.4	417.6	372.3	200.3	308.5	231.2	401.4		180.6	453.9	195.5	225	313.6	377.6	150.5	354.9
22.5333	278.7	237.1	385.5	357.8	188	316.6	253.8	382.4		174.2	457.2	196.3	216.3	343.5	376	164.7	342.1
22.55	316.8	235.2	388.9	359.6	192.3	320.7	253.9	396.5		171.7	457.1	202.2	225.6	315.1	363.8	154.7	349
22.5667	284.9	258.4	414.7	349.3	189	319.2	259.3	390.9		176.7	478.7	191.6	229.1	315.1	374.5	161.2	353.7
22.5833	280.9	243.2	393.1	362.2	195.1	316.7	254	402.2		185.7	459.7	188.3	224.8	323	372.3	150.1	357
22.6	289.3	240.4	386.1	373	200.1	311.9	258.8	404.3		211	446	204.5	228.2	332.6	368.9	140.2	336.5
22.6167	279.5	252.6	375	361	188.5	321.1	277.5	393.8		184.1	438.5	193.1	225.8	317.3	365.6	152	330.6
22.6333	283.7	232.4	412.4	372.5	192.1	322.6	252.7	389.5		189.6	464.4	194.2	225.2	314.3	388.4	155.7	355.7
22.65	293.7	239.7	428.4	375.6	201.1	313.8	257.9	406.9		190	465.8	197.1	228.1	338	391.2	152.2	346.6
22.6667	294.9	236.6	395.8	369.1	197.6	337.8	237.7	399.6		186.1	449.9	189.3	240.4	329.8	370.4	150	343.8
22.6833	284.3	235.8	395.8	367.2	200.9	304	227.3	407		187.4	455.8	199.6	224.5	305.9	377.5	152.8	350.4
22.7	270.2	239.3	407	394.5	198.1	305.8	239.8	416.6		183.6	427.1	204.5	225.7	306.5	380.6	155.2	345.4
22.7167	270.1	227.7	407.8	362.1	200.2	315.5	242.9	390		196.9	446.6	198.7	232.2	319.5	391	157.5	374.9
22.7333	285.4	235.7	396.5	359.8	198.3	310.2	234.5	407.9		192.7	458	210.5	214	326.7	382.2	156.5	348.8
22.75	291.5	246.5	399.6	352	195.5	305.1	229.8	404.4		181.2	467.2	200.1	213.8	333.8	365.7	145.1	359.2
22.7667	294.8	238.3	410.3	365.3	197.8	312.1	217.8	429.2		184.3	471.5	212.1	219.9	326.8	357.4	152.1	346.6
22.7833	271.3	227.2	396.3	342.1	203.5	302.6	235	395.1		203.9	482.4	199.2	229.4	317	370.8	145	352.3
22.8	299.1	234.6	409.8	366.1	193.9	328.7	228.1	409.1		193	459.6	205.8	223.1	318.1	371.1	150.6	359.9
22.8167	293.6	233.1	437.8	391.8	197.8	324.3	237.5	411.8		183.2	455	208.4	227.3	323.1	370.2	162.1	354.4
22.8333	306.9	234.8	436.6	398.4	198.2	326	232.5	409.4		184.7	479.9	204.3	222	340.1	366.9	151.2	344.7
22.85	291.7	235.7	389.5	386.7	207.1	298.5	222	410.2		173.1	474.5	199.9	221.7	326.4	373.5	151.5	359.6
22.8667	280	236.5	383.3	377.9	192.5	303.3	248.7	413.1		179.4	481.3	189.5	228.3	341.1	396.3	161.3	358.4
22.8833	274.3	238	390.9	377.4	198.1	312.1	238.2	405.5		204.9	479.6	194.9	210.5	335.1	388.8	156.3	354.4
22.9	277.6	234.1	399.2	379.6	195	297.1	243.3	409.9		203.7	477.7	194.3	224.6	331.9	382	162.3	341.2
22.9167	283.8	232	417.6	356.8	199.6	304.8	241.7	411.7		191.4	479.4	198.2	224.8	322.4	378.8	147.1	327.5
22.9333	289.7	233.1	409.2	365.7	203.4	299.3	243.5	416.3		195	485.7	202.9	223.7	319.1	360	151.5	349.2
22.95	285.3	234.2	379.8	354.2	198.2	308.8	220.1	425.5		176.7	483.6	192.6	223.4	332.8	370.2	151.9	349.6
22.9667	289.6	241.2	378.6	365.9	199.8	311.1	233.2	415.6		186.3	462.5	191.3	221.8	323.1	364.2	157.5	361.8
22.9833	283	240.3	400	347.9	197	312.3	227.5	418.6		190.9	460.7	193.5	216	322.8	369.2	153	350.3
23	280	233.9	405.1	355.6	194.2	308.8	222.4	419.4		185.5	454.3	195.9	217.5	321.7	366.2	155	354.7
23.0167	290.4	240	403.3	355.9	192.6	300.2	231.2	414.9		180.8	449.1	196.8	222.2	316.9	387.3	153	358.5
23.0333	281.1	247.1	426.4	364.9	194.1	309	222.8	427.1		180.7	441.2	202.3	229.8	311	361	155	367.6
23.05	279.5	249.7	423.2	382.5	201.5	311.9	228.9	429.9		187.5	445.8	200.3	222.1	322.8	367	162.4	370.8
23.0667	281.4	241.3	407.3	399	196.2	296.6	225	416.5		182.3	448.3	205	223.9	322.2	362.1	156.5	356.2
23.0833	290.8	232.6	412.7	394	205.4	290.9	222.9	410.7		188.9	457.7	198.9	217	318	363.1	156.4	354.1
23.1	294.2	231.1	416.2	372.7	197.1	301	215	400		189.9	444.6	202.6	216	323.8	379.3	153.9	359.2
23.1167	275.8	240.3	423.1	386	192.5	277.9	218.8	395.4		169.7	443.7	210.2	215.5	318.4	373.7	152.1	357.7
23.1333	288.4	232.2	418.1	346.4	187.6	309.1	219.6	405.5		177.6	445.7	205.3	218.2	324.2	370.6	159.3	360.9
23.15	274.1	227.9	400	356.2	197.9	303.7	224.3	402.8		174.4	457.2	208.4	221.7	324	368.8	162.4	345.3
23.1667	269.4	227.3	400.7	366.4	201	295.7	231.7	406.8		179.8	453.3	202.2	218.7	330	370.6	151.3	351
23.1833	286	237.9	426	361.8	204.3	302.9	210.1	424.7		185.1	460.7	198	223.7	319.6	368.1	155.7	329.1
23.2	292.9	228.9	404.6	356.4	198.5	347.8	218.6	419.4		184.4	450.4	199.4	228.9	340.7	362.5	157.6	352.6
23.2167	296.2	231.1	397.1	361.4	204.8	324.2	245.5	417.9		179.3	468.5	205.4	218	330.3	379.9	168	364.9
23.2333	276.1	236.4	390.9	372.8	202.3	330.1	227.3	410.9		183	464.3	200.1	225.4	311.2	389.2	158.6	351.8
23.25	272.8	233.7	413.9	368.8	212.9	315.9	218.1	399		199.3	467.5	194	227.1	305.1	371.8	146.3	347.6
23.2667	285.3	233.2	399.2	375.4	199.7	330.2	218.2	410.7		192.8	472	186.8	240	320.6	361.7	144	368
[truncated: 404 more rows]

## Sheet: Skin Temperature (Fig 2d)
Source data for Figure 2D-F
Time (minutes)	Old mice								Young mice
	O1	O2	O3	O4	O5	O6	O7	O8		Y1	Y2	Y3	Y4	Y5	Y6	Y7	Y8
-10	31.4	31.8	28.2	30.5	31	29.8	29	31.2		26.7	27.3	29.4	28.5	27.1	29.8	27.9	31.6
-9.98333	31.4	31.8	28.2	30.5	31	29.8	29.1	31.2		26.7	27.3	29.4	28.5	27.1	29.8	27.9	31.6
-9.96667	31.4	31.8	28.2	30.5	31.1	29.8	29.1	31.2		26.7	27.3	29.4	28.4	27.1	29.8	27.9	31.6
-9.95	31.4	31.8	28.2	30.5	31.1	29.8	29.1	31.2		26.7	27.3	29.4	28.4	27.1	29.8	27.9	31.7
-9.93333	31.4	31.8	28.2	30.5	31.1	29.8	29.1	31.2		26.7	27.3	29.4	28.4	27.1	29.8	27.9	31.7
-9.91667	31.4	31.8	28.2	30.5	31.1	29.8	29.1	31.2		26.7	27.3	29.4	28.4	27.1	29.8	27.9	31.7
-9.9	31.4	31.8	28.2	30.5	31.1	29.8	29.1	31.2		26.7	27.3	29.4	28.4	27.1	29.8	27.9	31.7
-9.88333	31.3	31.8	28.2	30.5	31.1	29.8	29.1	31.3		26.7	27.3	29.4	28.4	27.1	29.8	27.9	31.7
-9.86667	31.3	31.8	28.2	30.5	31.1	29.8	29.1	31.3		26.7	27.3	29.4	28.4	27.1	29.8	27.9	31.7
-9.85	31.3	31.8	28.2	30.5	31.1	29.9	29.1	31.3		26.7	27.3	29.4	28.4	27.1	29.8	27.9	31.7
-9.83333	31.3	31.8	28.2	30.5	31.1	29.9	29.1	31.3		26.7	27.3	29.4	28.4	27.1	29.8	27.9	31.7
-9.81667	31.3	31.8	28.1	30.5	31.1	29.9	29.1	31.2		26.7	27.3	29.4	28.4	27.1	29.8	27.9	31.7
-9.8	31.3	31.8	28.1	30.6	31.1	29.9	29.1	31.2		26.7	27.3	29.4	28.4	27.1	29.8	27.9	31.7
-9.78333	31.3	31.8	28.1	30.6	31.1	29.9	29.1	31.2		26.7	27.3	29.4	28.4	27.1	29.8	27.9	31.7
-9.76667	31.3	31.8	28.1	30.6	31.2	29.9	29.1	31.2		26.7	27.3	29.4	28.4	27.1	29.8	27.9	31.7
-9.75	31.3	31.8	28.1	30.6	31.2	29.9	29.1	31.2		26.7	27.3	29.4	28.4	27.1	29.8	27.9	31.7
-9.73333	31.3	31.8	28.1	30.6	31.2	29.9	29.2	31.2		26.7	27.3	29.4	28.4	27.1	29.8	27.9	31.7
-9.71667	31.3	31.8	28.1	30.6	31.2	29.9	29.2	31.2		26.7	27.3	29.4	28.4	27.1	29.8	27.9	31.7
-9.7	31.3	31.8	28.1	30.6	31.2	29.9	29.2	31.2		26.7	27.3	29.4	28.4	27.1	29.8	27.9	31.7
-9.68333	31.3	31.8	28.1	30.6	31.2	29.9	29.2	31.2		26.7	27.3	29.4	28.4	27.1	29.8	27.9	31.7
-9.66667	31.3	31.8	28.1	30.6	31.2	29.9	29.2	31.2		26.7	27.3	29.4	28.4	27.1	29.8	27.9	31.7
-9.65	31.3	31.8	28.1	30.6	31.2	29.9	29.2	31.2		26.6	27.3	29.4	28.4	27.1	29.8	27.9	31.7
-9.63333	31.3	31.8	28.1	30.6	31.1	29.9	29.2	31.2		26.6	27.3	29.4	28.4	27.1	29.7	27.8	31.7
-9.61667	31.3	31.8	28.1	30.6	31.1	29.9	29.2	31.3		26.6	27.3	29.4	28.4	27.1	29.7	27.8	31.7
-9.6	31.3	31.8	28.1	30.6	31.1	29.9	29.2	31.3		26.6	27.3	29.4	28.4	27.1	29.7	27.8	31.7
-9.58333	31.3	31.8	28.2	30.6	31.1	29.9	29.2	31.3		26.6	27.3	29.4	28.4	27.1	29.7	27.8	31.7
-9.56667	31.3	31.8	28.1	30.6	31.1	29.9	29.2	31.3		26.7	27.3	29.4	28.4	27.1	29.7	27.8	31.7
-9.55	31.3	31.8	28.2	30.6	31.1	29.9	29.2	31.3		26.7	27.3	29.4	28.4	27.1	29.7	27.8	31.7
-9.53333	31.3	31.8	28.1	30.6	31.1	29.9	29.2	31.3		26.7	27.3	29.4	28.4	27.1	29.7	27.8	31.7
-9.51667	31.3	31.8	28.1	30.6	31.1	30	29.2	31.3		26.7	27.3	29.4	28.4	27.1	29.7	27.8	31.7
-9.5	31.3	31.8	28.2	30.6	31.1	30	29.2	31.3		26.7	27.3	29.4	28.4	27.1	29.7	27.8	31.7
-9.48333	31.3	31.8	28.2	30.6	31.1	30	29.2	31.3		26.7	27.3	29.4	28.4	27	29.7	27.8	31.7
-9.46667	31.3	31.8	28.1	30.6	31.1	30	29.2	31.3		26.6	27.3	29.4	28.4	27	29.7	27.8	31.7
-9.45	31.3	31.8	28.1	30.6	31.1	30	29.3	31.3		26.6	27.3	29.4	28.4	27	29.7	27.8	31.7
-9.43333	31.3	31.8	28.1	30.6	31.1	30	29.3	31.3		26.6	27.3	29.4	28.4	27	29.7	27.8	31.7
-9.41667	31.3	31.8	28.1	30.6	31.1	30	29.3	31.3		26.6	27.3	29.4	28.4	27	29.7	27.8	31.7
-9.4	31.3	31.8	28.1	30.6	31.1	30	29.3	31.3		26.6	27.3	29.4	28.4	27	29.7	27.8	31.7
-9.38333	31.3	31.8	28.1	30.6	31.1	30	29.3	31.3		26.6	27.3	29.4	28.4	27	29.7	27.8	31.7
-9.36667	31.3	31.8	28.1	30.6	31.1	30	29.3	31.3		26.6	27.3	29.4	28.4	27	29.7	27.8	31.7
-9.35	31.3	31.8	28.1	30.6	31.1	30	29.3	31.3		26.6	27.3	29.4	28.4	27	29.7	27.8	31.7
-9.33333	31.3	31.8	28.2	30.6	31.1	30	29.3	31.3		26.6	27.3	29.4	28.4	27	29.7	27.8	31.7
-9.31667	31.3	31.8	28.1	30.6	31.1	30	29.3	31.3		26.6	27.3	29.4	28.4	27	29.7	27.8	31.7
-9.3	31.3	31.8	28.1	30.6	31.1	30	29.3	31.3		26.6	27.3	29.4	28.4	27	29.7	27.8	31.7
-9.28333	31.3	31.8	28.1	30.6	31.1	30	29.3	31.3		26.6	27.3	29.4	28.4	27	29.7	27.8	31.7
-9.26667	31.3	31.8	28.1	30.6	31.2	30	29.3	31.3		26.6	27.3	29.4	28.4	27	29.7	27.8	31.7
-9.25	31.3	31.8	28.1	30.6	31.2	30	29.3	31.3		26.6	27.3	29.4	28.4	27	29.7	27.8	31.7
-9.23333	31.3	31.8	28.1	30.6	31.2	30	29.3	31.4		26.6	27.3	29.4	28.4	27	29.7	27.8	31.7
-9.21667	31.3	31.8	28.1	30.6	31.2	30	29.3	31.4		26.6	27.3	29.4	28.4	27	29.7	27.8	31.7
-9.2	31.3	31.8	28.1	30.6	31.2	30	29.3	31.4		26.6	27.3	29.4	28.4	27	29.7	27.8	31.7
-9.18333	31.3	31.8	28.1	30.6	31.2	30	29.3	31.4		26.6	27.3	29.4	28.4	27	29.7	27.8	31.7
-9.16667	31.3	31.8	28.1	30.6	31.2	30	29.3	31.4		26.6	27.3	29.4	28.3	27	29.7	27.7	31.8
-9.15	31.3	31.8	28.2	30.6	31.2	30	29.3	31.4		26.6	27.3	29.4	28.3	27	29.7	27.7	31.8
-9.13333	31.3	31.8	28.1	30.6	31.2	30	29.3	31.4		26.6	27.3	29.4	28.3	27	29.7	27.7	31.8
-9.11667	31.3	31.8	28.1	30.6	31.3	30	29.3	31.4		26.6	27.3	29.4	28.3	27	29.7	27.8	31.8
-9.1	31.3	31.8	28.1	30.6	31.3	30	29.3	31.4		26.6	27.3	29.4	28.3	27	29.7	27.7	31.8
-9.08333	31.3	31.8	28.1	30.6	31.3	30.1	29.3	31.4		26.6	27.3	29.4	28.3	27	29.7	27.7	31.8
-9.06667	31.3	31.8	28.1	30.6	31.3	30.1	29.3	31.4		26.6	27.3	29.4	28.3	27	29.7	27.7	31.8
-9.05	31.3	31.8	28.1	30.6	31.3	30.1	29.4	31.4		26.5	27.3	29.4	28.3	27	29.8	27.7	31.8
-9.03333	31.3	31.8	28.1	30.6	31.3	30.1	29.4	31.4		26.5	27.3	29.4	28.3	27	29.8	27.8	31.8
-9.01667	31.3	31.8	28.1	30.6	31.3	30.1	29.4	31.4		26.5	27.3	29.4	28.3	27	29.8	27.8	31.8
-9	31.3	31.8	28.1	30.6	31.2	30.1	29.4	31.4		26.5	27.3	29.4	28.3	27	29.8	27.8	31.8
-8.98333	31.3	31.8	28.1	30.6	31.2	30.1	29.4	31.5		26.5	27.3	29.4	28.3	27	29.8	27.8	31.7
-8.96667	31.3	31.8	28.1	30.6	31.2	30.1	29.4	31.5		26.5	27.3	29.4	28.2	27	29.8	27.8	31.7
-8.95	31.3	31.8	28.1	30.6	31.2	30.1	29.4	31.5		26.5	27.3	29.4	28.2	27	29.8	27.8	31.7
-8.93333	31.3	31.8	28.1	30.6	31.2	30.1	29.4	31.5		26.5	27.3	29.4	28.2	27	29.8	27.8	31.7
-8.91667	31.3	31.8	28.1	30.6	31.2	30.1	29.4	31.5		26.5	27.3	29.4	28.2	27	29.8	27.8	31.7
-8.9	31.3	31.8	28.1	30.6	31.2	30.1	29.4	31.5		26.5	27.3	29.4	28.2	27	29.8	27.8	31.7
-8.88333	31.3	31.8	28.1	30.6	31.2	30.1	29.4	31.5		26.5	27.3	29.4	28.2	27	29.8	27.8	31.7
-8.86667	31.3	31.8	28.1	30.6	31.2	30.1	29.4	31.5		26.5	27.3	29.4	28.2	27	29.8	27.8	31.6
-8.85	31.3	31.8	28.1	30.6	31.2	30.1	29.4	31.5		26.6	27.3	29.4	28.2	26.9	29.8	27.8	31.6
-8.83333	31.3	31.8	28.1	30.6	31.2	30.1	29.4	31.5		26.6	27.3	29.4	28.2	26.9	29.7	27.8	31.6
-8.81667	31.3	31.8	28.1	30.6	31.2	30.1	29.4	31.5		26.6	27.2	29.4	28.2	26.9	29.7	27.8	31.6
-8.8	31.3	31.8	28.1	30.6	31.2	30.1	29.4	31.5		26.6	27.3	29.4	28.2	26.9	29.7	27.8	31.6
-8.78333	31.3	31.8	28.1	30.6	31.2	30.1	29.4	31.5		26.6	27.3	29.4	28.2	26.9	29.7	27.8	31.6
-8.76667	31.3	31.8	28.1	30.6	31.2	30.1	29.4	31.5		26.6	27.2	29.4	28.2	26.9	29.7	27.8	31.6
-8.75	31.3	31.8	28.1	30.6	31.2	30.1	29.4	31.5		26.6	27.2	29.4	28.2	26.9	29.7	27.8	31.6
-8.73333	31.3	31.8	28.1	30.6	31.2	30.1	29.3	31.5		26.6	27.2	29.4	28.2	26.9	29.8	27.8	31.5
-8.71667	31.3	31.8	28.1	30.6	31.2	30.1	29.3	31.5		26.6	27.2	29.5	28.2	26.9	29.8	27.8	31.5
-8.7	31.2	31.8	28.1	30.6	31.2	30.1	29.3	31.5		26.6	27.2	29.5	28.2	26.9	29.8	27.8	31.5
-8.68333	31.2	31.8	28.1	30.6	31.2	30.1	29.3	31.5		26.6	27.2	29.5	28.2	26.9	29.8	27.8	31.5
-8.66667	31.2	31.8	28.1	30.6	31.2	30.1	29.3	31.5		26.6	27.2	29.5	28.2	26.9	29.8	27.8	31.5
-8.65	31.2	31.8	28.1	30.6	31.2	30.1	29.3	31.5		26.6	27.2	29.5	28.3	26.9	29.8	27.8	31.5
-8.63333	31.2	31.8	28.1	30.6	31.2	30.1	29.3	31.5		26.6	27.2	29.5	28.3	26.9	29.8	27.8	31.5
-8.61667	31.2	31.8	28.1	30.6	31.2	30.1	29.3	31.5		26.6	27.3	29.5	28.3	26.9	29.8	27.8	31.5
-8.6	31.2	31.8	28.1	30.6	31.2	30.1	29.3	31.5		26.6	27.3	29.5	28.3	26.9	29.8	27.8	31.4
-8.58333	31.2	31.8	28.1	30.6	31.2	30.1	29.3	31.5		26.6	27.2	29.5	28.3	26.9	29.8	27.8	31.4
-8.56667	31.2	31.8	28.1	30.6	31.2	30.1	29.3	31.5		26.6	27.2	29.5	28.3	27.1	29.8	27.8	31.5
-8.55	31.2	31.8	28.1	30.6	31.2	30.1	29.3	31.5		26.6	27.2	29.5	28.3	27.1	29.8	27.8	31.5
-8.53333	31.2	31.8	28.1	30.6	31.2	30.1	29.3	31.5		26.6	27.2	29.4	28.3	27.1	29.8	27.8	31.5
-8.51667	31.2	31.8	28.1	30.6	31.2	30.1	29.3	31.5		26.6	27.2	29.4	28.3	27.1	29.8	27.8	31.5
-8.5	31.2	31.8	28.1	30.6	31.2	30.1	29.3	31.5		26.6	27.2	29.4	28.3	27.1	29.7	27.8	31.5
-8.48333	31.2	31.8	28.1	30.6	31.2	30.1	29.3	31.5		26.6	27.2	29.4	28.3	27.1	29.7	27.8	31.5
-8.46667	31.2	31.8	28.1	30.6	31.2	30.1	29.3	31.5		26.6	27.2	29.4	28.3	27.1	29.7	27.8	31.5
-8.45	31.2	31.9	28.1	30.6	31.2	30.1	29.3	31.5		26.6	27.2	29.4	28.3	27.1	29.7	27.8	31.5
-8.43333	31.2	31.9	28.1	30.7	31.2	30.1	29.3	31.5		26.7	27.2	29.4	28.3	27.1	29.7	27.8	31.5
-8.41667	31.2	31.9	28.1	30.7	31.2	30.1	29.3	31.5		26.7	27.3	29.4	28.3	27.1	29.7	27.8	31.5
-8.4	31.2	31.9	28.1	30.7	31.2	30.1	29.3	31.5		26.7	27.2	29.3	28.3	27.2	29.7	27.8	31.5
-8.38333	31.2	31.9	28.1	30.7	31.2	30.1	29.3	31.5		26.7	27.2	29.3	28.3	27.2	29.7	27.8	31.5
-8.36667	31.2	31.9	28.1	30.7	31.2	30.1	29.3	31.5		26.7	27.2	29.4	28.3	27.2	29.7	27.8	31.5
-8.35	31.2	31.9	28.1	30.7	31.2	30.1	29.3	31.5		26.7	27.2	29.4	28.3	27.2	29.7	27.8	31.5
-8.33333	31.2	31.9	28.1	30.7	31.2	30.1	29.3	31.5		26.7	27.3	29.4	28.3	27.2	29.7	27.8	31.5
-8.31667	31.2	31.9	28.1	30.7	31.2	30.1	29.3	31.6		26.7	27.3	29.4	28.3	27.2	29.7	27.8	31.5
-8.3	31.2	31.9	28.1	30.7	31.2	30.1	29.3	31.6		26.7	27.3	29.4	28.3	27.2	29.7	27.8	31.5
-8.28333	31.2	31.9	28.1	30.7	31.2	30.1	29.3	31.6		26.7	27.3	29.4	28.3	27.2	29.7	27.8	31.5
-8.26667	31.2	31.9	28.1	30.7	31.2	30.1	29.3	31.6		26.7	27.3	29.4	28.3	27.2	29.7	27.8	31.5
-8.25	31.2	31.9	28.1	30.7	31.2	30.1	29.4	31.6		26.7	27.3	29.4	28.3	27.2	29.7	27.8	31.5
-8.23333	31.2	31.9	28.1	30.7	31.2	30.1	29.4	31.5		26.7	27.3	29.4	28.3	27.2	29.7	27.8	31.5
-8.21667	31.2	31.9	28.1	30.7	31.2	30.1	29.4	31.6		26.7	27.3	29.4	28.3	27.2	29.6	27.8	31.5
-8.2	31.2	31.9	28.1	30.7	31.2	30.1	29.4	31.6		26.7	27.3	29.4	28.3	27.2	29.6	27.8	31.5
-8.18333	31.2	31.9	28.1	30.7	31.2	30.1	29.4	31.6		26.7	27.3	29.4	28.4	27.2	29.6	27.8	31.5
-8.16667	31.2	31.9	28.1	30.7	31.2	30.1	29.4	31.6		26.7	27.3	29.4	28.4	27.2	29.6	27.8	31.5
-8.15	31.2	31.9	28.2	30.7	31.2	30.2	29.4	31.6		26.7	27.3	29.4	28.4	27.2	29.6	27.8	31.5
-8.13333	31.2	31.9	28.2	30.7	31.1	30.1	29.4	31.6		26.7	27.3	29.4	28.4	27.2	29.6	27.8	31.6
-8.11667	31.2	31.9	28.2	30.7	31.1	30.1	29.4	31.6		26.7	27.2	29.4	28.4	27.2	29.6	27.8	31.6
-8.1	31.2	31.9	28.2	30.7	31.1	30.2	29.4	31.6		26.7	27.2	29.4	28.4	27.2	29.7	27.8	31.6
-8.08333	31.2	31.9	28.2	30.7	31.1	30.2	29.4	31.6		26.7	27.2	29.4	28.4	27.2	29.6	27.8	31.6
-8.06667	31.2	31.9	28.2	30.7	31.1	30.1	29.4	31.6		26.7	27.2	29.4	28.4	27.2	29.6	27.8	31.5
-8.05	31.2	31.9	28.2	30.8	31.1	30.2	29.4	31.6		26.7	27.2	29.4	28.4	27.2	29.6	27.8	31.5
-8.03333	31.1	31.9	28.2	30.8	31.1	30.2	29.4	31.6		26.7	27.2	29.4	28.4	27.2	29.6	27.8	31.5
-8.01667	31.1	31.9	28.2	30.8	31.2	30.2	29.4	31.6		26.7	27.2	29.4	28.4	27.2	29.6	27.8	31.5
-8	31.2	31.9	28.2	30.8	31.2	30.2	29.4	31.6		26.7	27.2	29.4	28.4	27.2	29.6	27.8	31.5
-7.98333	31.2	31.9	28.2	30.8	31.2	30.2	29.4	31.6		26.7	27.2	29.4	28.4	27.2	29.6	27.8	31.5
-7.96667	31.2	31.9	28.2	30.8	31.1	30.2	29.4	31.6		26.7	27.2	29.4	28.4	27.2	29.6	27.8	31.5
-7.95	31.2	31.9	28.2	30.8	31.2	30.2	29.4	31.6		26.7	27.2	29.4	28.4	27.2	29.6	27.8	31.5
-7.93333	31.2	31.9	28.2	30.8	31.2	30.2	29.4	31.5		26.7	27.2	29.4	28.4	27.2	29.7	27.8	31.5
-7.91667	31.2	31.9	28.2	30.8	31.1	30.2	29.4	31.6		26.7	27.2	29.4	28.4	27.2	29.7	27.8	31.5
-7.9	31.2	31.9	28.2	30.8	31.1	30.2	29.4	31.6		26.7	27.2	29.4	28.4	27.2	29.7	27.8	31.5
-7.88333	31.2	31.9	28.2	30.8	31.1	30.1	29.4	31.5		26.7	27.2	29.4	28.4	27.2	29.7	27.8	31.5
-7.86667	31.2	31.9	28.2	30.8	31.1	30.1	29.4	31.5		26.7	27.2	29.4	28.4	27.2	29.7	27.8	31.5
-7.85	31.1	31.9	28.2	30.8	31.1	30.1	29.4	31.5		26.7	27.2	29.4	28.4	27.2	29.7	27.8	31.5
-7.83333	31.2	31.9	28.2	30.8	31.1	30.1	29.4	31.5		26.7	27.2	29.4	28.4	27.2	29.7	27.8	31.5
-7.81667	31.2	31.9	28.2	30.8	31.2	30.1	29.5	31.6		26.7	27.2	29.4	28.4	27.2	29.7	27.8	31.5
-7.8	31.2	31.9	28.2	30.8	31.1	30.1	29.5	31.6		26.7	27.2	29.4	28.4	27.2	29.7	27.8	31.5
-7.78333	31.2	31.9	28.2	30.8	31.1	30.1	29.5	31.6		26.7	27.2	29.4	28.4	27.2	29.7	27.8	31.5
-7.76667	31.1	31.9	28.2	30.8	31.1	30.1	29.5	31.5		26.7	27.2	29.4	28.4	27.2	29.7	27.8	31.5
-7.75	31.1	31.9	28.2	30.8	31.2	30.1	29.5	31.5		26.7	27.2	29.4	28.4	27.2	29.7	27.8	31.5
-7.73333	31.2	31.9	28.2	30.8	31.2	30.1	29.5	31.5		26.7	27.2	29.4	28.4	27.2	29.7	27.8	31.5
-7.71667	31.1	32	28.2	30.8	31.2	30	29.5	31.5		26.7	27.2	29.4	28.4	27.2	29.7	27.8	31.5
-7.7	31.2	32	28.2	30.8	31.1	30	29.5	31.5		26.7	27.2	29.4	28.4	27.2	29.7	27.8	31.5
-7.68333	31.2	32	28.2	30.8	31.1	30	29.5	31.5		26.7	27.2	29.4	28.4	27.2	29.7	27.8	31.5
-7.66667	31.2	32	28.2	30.8	31.1	30	29.5	31.5		26.7	27.2	29.4	28.4	27.2	29.7	27.7	31.5
-7.65	31.2	32	28.2	30.8	31.1	30	29.5	31.5		26.7	27.2	29.4	28.4	27.2	29.7	27.7	31.5
-7.63333	31.2	32	28.2	30.8	31.1	30	29.5	31.6		26.7	27.2	29.4	28.4	27.2	29.7	27.7	31.5
-7.61667	31.2	32	28.2	30.8	31.1	30	29.5	31.6		26.7	27.2	29.4	28.4	27.3	29.7	27.7	31.5
-7.6	31.2	32	28.2	30.8	31.1	30	29.5	31.6		26.7	27.2	29.4	28.4	27.3	29.7	27.7	31.5
-7.58333	31.2	32	28.2	30.8	31.1	30	29.5	31.6		26.7	27.2	29.4	28.5	27.3	29.7	27.7	31.5
-7.56667	31.2	32	28.2	30.8	31.1	30	29.5	31.6		26.7	27.2	29.4	28.5	27.3	29.7	27.7	31.5
-7.55	31.2	32	28.2	30.8	31.1	30	29.5	31.6		26.7	27.2	29.4	28.5	27.3	29.7	27.7	31.5
-7.53333	31.2	32	28.2	30.8	31.1	30	29.5	31.6		26.7	27.2	29.4	28.5	27.2	29.7	27.7	31.5
-7.51667	31.2	32	28.2	30.8	31.1	30	29.5	31.6		26.7	27.2	29.4	28.5	27.2	29.7	27.7	31.5
-7.5	31.2	32	28.2	30.8	31.1	30	29.5	31.6		26.7	27.2	29.4	28.5	27.2	29.7	27.7	31.5
-7.48333	31.2	32	28.2	30.8	31.1	30	29.5	31.6		26.7	27.2	29.4	28.5	27.2	29.6	27.7	31.5
-7.46667	31.2	32	28.2	30.8	31.1	30	29.5	31.5		26.7	27.2	29.4	28.5	27.3	29.6	27.6	31.5
-7.45	31.2	32	28.2	30.8	31.1	30	29.5	31.6		26.7	27.2	29.4	28.5	27.3	29.6	27.6	31.5
-7.43333	31.1	32	28.2	30.8	31.1	30	29.5	31.6		26.7	27.2	29.4	28.5	27.3	29.6	27.6	31.5
-7.41667	31.1	32	28.2	30.8	31.1	30	29.5	31.6		26.7	27.2	29.3	28.5	27.3	29.6	27.6	31.5
-7.4	31.1	32	28.2	30.8	31.1	30	29.5	31.6		26.7	27.2	29.3	28.5	27.3	29.6	27.6	31.5
-7.38333	31.1	32	28.2	30.8	31.1	30	29.5	31.6		26.7	27.2	29.3	28.5	27.3	29.5	27.6	31.5
-7.36667	31.1	32	28.2	30.8	31.1	29.9	29.5	31.6		26.7	27.2	29.3	28.5	27.3	29.5	27.6	31.5
-7.35	31.1	32	28.2	30.8	31.1	29.9	29.5	31.6		26.7	27.2	29.3	28.5	27.3	29.5	27.6	31.5
-7.33333	31.1	32	28.2	30.8	31.1	29.9	29.5	31.6		26.7	27.2	29.3	28.5	27.3	29.6	27.6	31.5
-7.31667	31.1	32	28.1	30.8	31.1	29.9	29.5	31.6		26.7	27.2	29.3	28.5	27.3	29.6	27.6	31.6
-7.3	31.1	32	28.1	30.8	31.1	29.9	29.5	31.6		26.7	27.2	29.3	28.5	27.3	29.6	27.6	31.6
-7.28333	31.1	32	28.2	30.8	31.1	29.9	29.5	31.6		26.7	27.2	29.3	28.5	27.3	29.6	27.6	31.6
-7.26667	31.1	32	28.2	30.8	31.1	29.9	29.5	31.6		26.7	27.2	29.3	28.5	27.3	29.6	27.6	31.6
-7.25	31.1	32	28.2	30.7	31.1	29.9	29.5	31.6		26.7	27.2	29.3	28.5	27.3	29.6	27.6	31.5
-7.23333	31.1	32	28.2	30.7	31.1	29.9	29.5	31.7		26.7	27.2	29.3	28.5	27.3	29.6	27.6	31.5
-7.21667	31.1	32	28.2	30.7	31.1	29.9	29.5	31.7		26.7	27.2	29.3	28.5	27.3	29.6	27.6	31.5
-7.2	31.1	32	28.2	30.7	31.1	29.9	29.5	31.7		26.7	27.2	29.3	28.4	27.3	29.6	27.6	31.5
-7.18333	31.1	32	28.2	30.7	31.1	29.9	29.5	31.7		26.7	27.2	29.3	28.4	27.3	29.6	27.6	31.5
-7.16667	31.1	32	28.2	30.7	31.1	29.9	29.4	31.7		26.7	27.2	29.3	28.4	27.3	29.6	27.6	31.5
-7.15	31.1	32	28.2	30.7	31.1	29.9	29.4	31.7		26.7	27.2	29.3	28.4	27.3	29.6	27.6	31.5
-7.13333	31.1	32	28.2	30.7	31.2	29.9	29.4	31.7		26.7	27.2	29.3	28.4	27.3	29.6	27.6	31.5
-7.11667	31.1	32.1	28.2	30.7	31.2	29.9	29.4	31.7		26.7	27.2	29.4	28.5	27.3	29.6	27.6	31.5
-7.1	31.1	32.1	28.2	30.7	31.2	29.9	29.4	31.7		26.7	27.2	29.4	28.4	27.3	29.6	27.6	31.5
-7.08333	31.1	32.1	28.2	30.7	31.2	29.9	29.4	31.7		26.7	27.2	29.4	28.4	27.3	29.6	27.6	31.5
-7.06667	31.1	32.1	28.2	30.7	31.2	29.9	29.4	31.7		26.7	27.2	29.4	28.4	27.3	29.6	27.6	31.5
-7.05	31.1	32.1	28.2	30.7	31.2	29.8	29.4	31.7		26.7	27.2	29.4	28.4	27.3	29.6	27.6	31.5
-7.03333	31.1	32.1	28.2	30.7	31.2	29.8	29.4	31.7		26.7	27.2	29.4	28.4	27.3	29.6	27.6	31.5
-7.01667	31.1	32.1	28.2	30.7	31.2	29.9	29.4	31.7		26.7	27.3	29.4	28.4	27.3	29.6	27.6	31.5
-7	31.1	32.1	28.2	30.7	31.2	29.8	29.4	31.7		26.7	27.2	29.4	28.4	27.3	29.6	27.6	31.5
-6.98333	31.1	32.1	28.2	30.7	31.2	29.8	29.4	31.7		26.7	27.3	29.4	28.4	27.3	29.6	27.6	31.6
-6.96667	31.1	32.1	28.2	30.7	31.2	29.8	29.4	31.7		26.7	27.3	29.4	28.4	27.2	29.6	27.6	31.6
-6.95	31.1	32.1	28.2	30.7	31.2	29.8	29.4	31.7		26.7	27.3	29.4	28.4	27.2	29.6	27.6	31.6
-6.93333	31.1	32	28.2	30.7	31.2	29.8	29.4	31.7		26.7	27.3	29.4	28.4	27.2	29.6	27.6	31.6
-6.91667	31.1	32	28.2	30.7	31.2	29.8	29.4	31.7		26.7	27.3	29.4	28.4	27.2	29.6	27.6	31.5
-6.9	31.1	32	28.2	30.7	31.2	29.8	29.4	31.7		26.7	27.3	29.4	28.4	27.2	29.6	27.6	31.6
-6.88333	31.1	32	28.2	30.6	31.2	29.8	29.4	31.7		26.7	27.3	29.4	28.4	27.2	29.6	27.6	31.6
-6.86667	31.1	32	28.2	30.6	31.2	29.8	29.4	31.7		26.7	27.3	29.4	28.4	27.2	29.6	27.6	31.6
-6.85	31.1	32	28.3	30.6	31.3	29.8	29.4	31.7		26.7	27.3	29.4	28.4	27.2	29.6	27.6	31.6
-6.83333	31.1	32	28.3	30.6	31.3	29.8	29.4	31.7		26.7	27.3	29.4	28.4	27.2	29.6	27.6	31.6
-6.81667	31.2	32	28.3	30.6	31.3	29.8	29.4	31.7		26.7	27.3	29.4	28.4	27.2	29.6	27.6	31.6
-6.8	31.2	32	28.3	30.6	31.3	29.8	29.4	31.7		26.7	27.3	29.4	28.4	27.2	29.6	27.6	31.5
-6.78333	31.2	32	28.3	30.6	31.3	29.8	29.4	31.7		26.7	27.3	29.4	28.4	27.2	29.6	27.6	31.5
-6.76667	31.2	32.1	28.3	30.6	31.3	29.8	29.4	31.7		26.7	27.3	29.4	28.4	27.2	29.6	27.6	31.5
-6.75	31.2	32.1	28.3	30.6	31.3	29.8	29.4	31.7		26.7	27.3	29.4	28.4	27.2	29.6	27.6	31.5
-6.73333	31.2	32.1	28.3	30.6	31.3	29.8	29.4	31.7		26.7	27.3	29.4	28.4	27.2	29.6	27.6	31.5
-6.71667	31.2	32.1	28.3	30.6	31.3	29.8	29.4	31.7		26.7	27.3	29.4	28.4	27.2	29.7	27.6	31.6
-6.7	31.2	32.1	28.3	30.6	31.3	29.8	29.4	31.7		26.7	27.3	29.4	28.4	27.2	29.7	27.6	31.5
-6.68333	31.2	32.1	28.3	30.6	31.3	29.8	29.4	31.7		26.7	27.3	29.4	28.4	27.2	29.7	27.6	31.5
-6.66667	31.2	32.1	28.3	30.6	31.3	29.8	29.4	31.7		26.7	27.3	29.4	28.4	27.2	29.7	27.6	31.6
-6.65	31.2	32.1	28.3	30.6	31.3	29.8	29.4	31.7		26.7	27.3	29.4	28.4	27.2	29.7	27.6	31.6
-6.63333	31.2	32.1	28.3	30.6	31.3	29.8	29.4	31.7		26.7	27.3	29.4	28.4	27.2	29.7	27.6	31.6
-6.61667	31.2	32.1	28.3	30.6	31.3	29.8	29.4	31.7		26.7	27.3	29.4	28.4	27.2	29.7	27.6	31.6
-6.6	31.2	32.1	28.3	30.5	31.3	29.8	29.4	31.7		26.7	27.3	29.4	28.4	27.2	29.7	27.6	31.6
-6.58333	31.2	32.1	28.3	30.6	31.3	29.8	29.4	31.7		26.7	27.3	29.4	28.4	27.2	29.7	27.6	31.6
-6.56667	31.2	32.1	28.3	30.6	31.3	29.8	29.4	31.7		26.7	27.3	29.4	28.5	27.2	29.7	27.6	31.6
-6.55	31.2	32.1	28.3	30.6	31.3	29.8	29.4	31.7		26.7	27.3	29.4	28.5	27.2	29.7	27.6	31.6
-6.53333	31.2	32.1	28.3	30.6	31.3	29.8	29.4	31.7		26.7	27.3	29.4	28.5	27.2	29.7	27.6	31.6
-6.51667	31.2	32.1	28.3	30.6	31.3	29.8	29.4	31.7		26.7	27.3	29.4	28.5	27.2	29.7	27.6	31.6
-6.5	31.2	32.1	28.3	30.6	31.3	29.8	29.4	31.7		26.7	27.3	29.4	28.5	27.2	29.7	27.6	31.6
-6.48333	31.2	32.1	28.3	30.6	31.3	29.8	29.4	31.7		26.7	27.3	29.4	28.5	27.2	29.7	27.6	31.5
-6.46667	31.2	32.1	28.3	30.6	31.3	29.8	29.4	31.7		26.7	27.3	29.4	28.5	27.2	29.7	27.6	31.5
-6.45	31.2	32.1	28.3	30.6	31.3	29.8	29.4	31.7		26.7	27.3	29.4	28.4	27.2	29.7	27.6	31.5
-6.43333	31.2	32.1	28.3	30.6	31.3	29.8	29.4	31.7		26.7	27.3	29.4	28.4	27.2	29.6	27.6	31.6
-6.41667	31.2	32.1	28.3	30.6	31.3	29.8	29.4	31.7		26.7	27.3	29.4	28.5	27.2	29.6	27.6	31.6
-6.4	31.2	32.1	28.3	30.6	31.3	29.8	29.4	31.7		26.7	27.3	29.4	28.5	27.2	29.6	27.6	31.6
-6.38333	31.2	32.1	28.3	30.6	31.3	29.8	29.4	31.7		26.7	27.4	29.4	28.5	27.2	29.6	27.6	31.6
-6.36667	31.2	32.1	28.3	30.5	31.3	29.8	29.4	31.7		26.7	27.3	29.4	28.5	27.2	29.6	27.6	31.5
-6.35	31.2	32.1	28.3	30.5	31.3	29.8	29.4	31.7		26.7	27.4	29.4	28.5	27.2	29.6	27.6	31.5
-6.33333	31.2	32.1	28.3	30.5	31.3	29.8	29.4	31.7		26.7	27.4	29.4	28.5	27.2	29.6	27.6	31.5
-6.31667	31.2	32.1	28.3	30.5	31.3	29.8	29.4	31.7		26.7	27.4	29.4	28.5	27.2	29.6	27.6	31.5
-6.3	31.2	32.1	28.3	30.5	31.3	29.8	29.4	31.7		26.7	27.4	29.4	28.5	27.2	29.6	27.6	31.5
-6.28333	31.2	32.1	28.3	30.5	31.3	29.8	29.3	31.7		26.7	27.4	29.4	28.5	27.2	29.6	27.6	31.5
-6.26667	31.2	32.1	28.3	30.5	31.3	29.8	29.3	31.7		26.7	27.4	29.4	28.5	27.2	29.6	27.6	31.5
-6.25	31.2	32.1	28.3	30.5	31.3	29.8	29.3	31.7		26.7	27.4	29.4	28.5	27.2	29.6	27.6	31.5
-6.23333	31.2	32.1	28.3	30.5	31.3	29.8	29.3	31.7		26.7	27.4	29.4	28.5	27.2	29.6	27.6	31.4
-6.21667	31.2	32.1	28.3	30.5	31.3	29.8	29.3	31.7		26.7	27.4	29.4	28.5	27.2	29.6	27.6	31.4
-6.2	31.2	32.1	28.3	30.5	31.3	29.8	29.3	31.7		26.6	27.4	29.4	28.5	27.2	29.6	27.6	31.4
-6.18333	31.2	32.1	28.3	30.5	31.4	29.8	29.3	31.7		26.6	27.4	29.4	28.5	27.2	29.6	27.6	31.4
-6.16667	31.2	32.1	28.3	30.5	31.4	29.8	29.3	31.7		26.6	27.4	29.4	28.5	27.2	29.6	27.6	31.4
-6.15	31.2	32.1	28.3	30.5	31.4	29.8	29.3	31.7		26.6	27.4	29.4	28.5	27.2	29.6	27.7	31.4
-6.13333	31.2	32.1	28.3	30.5	31.4	29.8	29.3	31.7		26.6	27.4	29.4	28.5	27.2	29.6	27.6	31.4
-6.11667	31.2	32.1	28.3	30.5	31.4	29.8	29.3	31.7		26.6	27.4	29.4	28.5	27.2	29.6	27.7	31.4
-6.1	31.2	32.1	28.3	30.5	31.4	29.8	29.4	31.7		26.6	27.3	29.4	28.5	27.2	29.6	27.6	31.4
-6.08333	31.2	32.1	28.3	30.5	31.4	29.8	29.4	31.7		26.6	27.3	29.4	28.5	27.2	29.6	27.6	31.4
-6.06667	31.2	32.1	28.4	30.5	31.4	29.8	29.4	31.7		26.6	27.4	29.4	28.5	27.2	29.7	27.6	31.4
-6.05	31.2	32.1	28.4	30.5	31.4	29.8	29.4	31.7		26.6	27.4	29.4	28.5	27.2	29.7	27.6	31.4
-6.03333	31.2	32.1	28.4	30.5	31.4	29.8	29.3	31.7		26.6	27.3	29.4	28.5	27.2	29.7	27.6	31.4
-6.01667	31.2	32.1	28.4	30.5	31.4	29.7	29.3	31.6		26.6	27.4	29.4	28.5	27.2	29.7	27.7	31.4
-6	31.2	32.1	28.4	30.5	31.4	29.7	29.3	31.6		26.6	27.4	29.4	28.5	27.2	29.7	27.7	31.4
-5.98333	31.2	32.1	28.4	30.5	31.4	29.7	29.3	31.6		26.6	27.3	29.4	28.5	27.2	29.7	27.6	31.4
-5.96667	31.2	32.1	28.4	30.5	31.4	29.7	29.3	31.6		26.6	27.3	29.4	28.5	27.2	29.7	27.6	31.4
-5.95	31.2	32.1	28.4	30.5	31.4	29.7	29.3	31.6		26.6	27.3	29.4	28.5	27.2	29.7	27.7	31.4
-5.93333	31.2	32.1	28.4	30.5	31.4	29.7	29.3	31.6		26.6	27.4	29.4	28.5	27.2	29.7	27.6	31.4
-5.91667	31.2	32.1	28.4	30.5	31.5	29.7	29.3	31.6		26.6	27.4	29.4	28.5	27.2	29.7	27.7	31.4
-5.9	31.2	32.1	28.4	30.5	31.5	29.7	29.3	31.6		26.6	27.3	29.4	28.5	27.2	29.7	27.7	31.4
-5.88333	31.2	32.1	28.4	30.5	31.5	29.7	29.3	31.6		26.6	27.4	29.4	28.5	27.2	29.7	27.6	31.4
-5.86667	31.2	32.1	28.4	30.5	31.5	29.7	29.3	31.6		26.6	27.4	29.4	28.5	27.2	29.7	27.6	31.4
-5.85	31.2	32.1	28.4	30.5	31.5	29.7	29.3	31.6		26.6	27.4	29.4	28.5	27.2	29.7	27.6	31.4
-5.83333	31.2	32.1	28.4	30.5	31.5	29.7	29.3	31.6		26.6	27.4	29.4	28.5	27.2	29.7	27.6	31.4
-5.81667	31.2	32.1	28.4	30.5	31.5	29.7	29.3	31.6		26.7	27.4	29.4	28.5	27.2	29.7	27.6	31.4
-5.8	31.2	32.1	28.4	30.6	31.5	29.7	29.3	31.6		26.7	27.3	29.4	28.5	27.2	29.7	27.7	31.4
-5.78333	31.2	32.1	28.4	30.6	31.5	29.7	29.3	31.6		26.7	27.3	29.4	28.5	27.2	29.7	27.7	31.4
-5.76667	31.2	32.1	28.4	30.6	31.5	29.7	29.3	31.6		26.7	27.3	29.4	28.5	27.2	29.7	27.7	31.4
-5.75	31.2	32.1	28.4	30.6	31.5	29.7	29.3	31.6		26.7	27.3	29.4	28.5	27.2	29.7	27.7	31.4
-5.73333	31.2	32.1	28.4	30.6	31.4	29.7	29.3	31.6		26.7	27.3	29.4	28.5	27.2	29.7	27.7	31.4
-5.71667	31.2	32.1	28.4	30.6	31.4	29.7	29.3	31.6		26.7	27.3	29.4	28.5	27.2	29.7	27.7	31.4
-5.7	31.3	32.1	28.4	30.6	31.4	29.7	29.3	31.6		26.7	27.3	29.4	28.5	27.2	29.7	27.7	31.4
-5.68333	31.2	32.1	28.4	30.6	31.3	29.7	29.4	31.5		26.7	27.3	29.4	28.5	27.2	29.7	27.7	31.3
-5.66667	31.2	32.1	28.4	30.6	31.3	29.7	29.3	31.5		26.8	27.3	29.4	28.5	27.2	29.7	27.7	31.3
-5.65	31.2	32.1	28.4	30.6	31.3	29.7	29.3	31.5		26.8	27.3	29.4	28.5	27.2	29.7	27.7	31.3
-5.63333	31.2	32.1	28.4	30.6	31.2	29.7	29.3	31.5		26.8	27.3	29.4	28.5	27.2	29.7	27.7	31.3
-5.61667	31.2	32	28.4	30.6	31.2	29.7	29.3	31.5		26.8	27.3	29.4	28.5	27.2	29.6	27.7	31.3
-5.6	31.2	32	28.4	30.6	31.2	29.6	29.3	31.5		26.8	27.3	29.4	28.5	27.2	29.6	27.7	31.3
-5.58333	31.2	32.1	28.4	30.6	31.1	29.6	29.3	31.5		26.8	27.3	29.4	28.5	27.2	29.6	27.7	31.3
-5.56667	31.3	32.1	28.4	30.6	31.1	29.6	29.4	31.5		26.8	27.3	29.5	28.5	27.2	29.6	27.7	31.3
-5.55	31.3	32.1	28.4	30.6	31.1	29.6	29.4	31.5		26.8	27.3	29.4	28.5	27.2	29.6	27.7	31.3
-5.53333	31.3	32.1	28.4	30.6	31.1	29.6	29.4	31.5		26.8	27.3	29.4	28.5	27.2	29.6	27.7	31.3
-5.51667	31.3	32.1	28.4	30.6	31.1	29.6	29.4	31.5		26.9	27.3	29.4	28.5	27.2	29.6	27.7	31.3
-5.5	31.3	32.1	28.4	30.6	31.1	29.6	29.4	31.5		26.9	27.3	29.4	28.5	27.2	29.6	27.7	31.3
-5.48333	31.3	32.1	28.4	30.6	31.1	29.6	29.4	31.5		26.9	27.3	29.4	28.5	27.2	29.6	27.7	31.3
-5.46667	31.4	32.1	28.4	30.6	31.1	29.6	29.4	31.5		26.9	27.3	29.4	28.5	27.2	29.6	27.7	31.3
-5.45	31.4	32	28.4	30.6	31.1	29.6	29.4	31.5		26.9	27.3	29.4	28.5	27.2	29.6	27.7	31.3
-5.43333	31.4	32	28.4	30.6	31.1	29.6	29.4	31.5		26.9	27.3	29.4	28.5	27.2	29.6	27.7	31.3
-5.41667	31.4	32	28.4	30.6	31.1	29.6	29.4	31.5		26.9	27.3	29.4	28.5	27.2	29.6	27.7	31.3
-5.4	31.4	32	28.4	30.6	31.1	29.6	29.4	31.5		26.9	27.4	29.4	28.5	27.2	29.6	27.7	31.3
-5.38333	31.4	32	28.4	30.6	31.1	29.6	29.4	31.5		26.9	27.4	29.4	28.5	27.2	29.6	27.7	31.3
-5.36667	31.4	32	28.4	30.6	31.1	29.6	29.4	31.5		26.9	27.4	29.4	28.5	27.2	29.6	27.7	31.3
-5.35	31.4	32	28.4	30.6	31.1	29.6	29.4	31.5		26.9	27.4	29.4	28.5	27.2	29.6	27.7	31.3
-5.33333	31.4	32	28.4	30.6	31.1	29.6	29.4	31.5		26.9	27.4	29.4	28.4	27.2	29.6	27.7	31.3
-5.31667	31.4	32	28.4	30.6	31.1	29.6	29.4	31.5		26.9	27.4	29.4	28.4	27.2	29.6	27.7	31.3
-5.3	31.4	32	28.4	30.6	31.1	29.6	29.4	31.5		26.9	27.4	29.4	28.5	27.2	29.6	27.7	31.3
-5.28333	31.4	32	28.4	30.6	31.1	29.6	29.4	31.6		26.9	27.4	29.4	28.5	27.2	29.6	27.7	31.3
-5.26667	31.4	32	28.4	30.6	31.2	29.6	29.4	31.6		26.9	27.4	29.4	28.5	27.2	29.5	27.7	31.3
-5.25	31.4	32	28.4	30.6	31.2	29.6	29.4	31.6		26.9	27.4	29.4	28.4	27.2	29.5	27.7	31.3
-5.23333	31.4	32	28.4	30.6	31.2	29.6	29.4	31.6		26.9	27.4	29.4	28.4	27.2	29.5	27.7	31.3
-5.21667	31.4	32	28.4	30.6	31.2	29.6	29.4	31.6		26.9	27.4	29.4	28.4	27.2	29.5	27.7	31.3
-5.2	31.4	32	28.4	30.6	31.2	29.6	29.4	31.6		26.9	27.4	29.4	28.4	27.2	29.4	27.7	31.3
-5.18333	31.4	32	28.4	30.6	31.2	29.6	29.4	31.6		26.9	27.4	29.4	28.4	27.2	29.4	27.7	31.4
-5.16667	31.4	32	28.4	30.6	31.2	29.6	29.4	31.6		26.9	27.4	29.4	28.4	27.2	29.4	27.7	31.4
-5.15	31.4	32	28.4	30.6	31.2	29.5	29.4	31.6		26.9	27.4	29.4	28.4	27.2	29.4	27.7	31.4
-5.13333	31.4	32	28.4	30.6	31.2	29.5	29.4	31.7		26.9	27.4	29.4	28.5	27.2	29.4	27.7	31.4
-5.11667	31.4	32	28.4	30.6	31.2	29.5	29.4	31.7		26.9	27.4	29.4	28.5	27.2	29.4	27.7	31.4
-5.1	31.4	32	28.5	30.6	31.2	29.5	29.4	31.7		26.9	27.4	29.4	28.5	27.2	29.4	27.7	31.4
-5.08333	31.4	32	28.5	30.6	31.2	29.5	29.4	31.6		26.9	27.4	29.4	28.5	27.2	29.4	27.7	31.4
-5.06667	31.4	32	28.5	30.6	31.3	29.5	29.4	31.7		26.9	27.4	29.4	28.5	27.2	29.4	27.7	31.4
-5.05	31.4	32	28.5	30.6	31.3	29.5	29.4	31.7		26.9	27.4	29.4	28.5	27.2	29.4	27.7	31.4
-5.03333	31.4	32	28.5	30.6	31.3	29.5	29.4	31.7		26.9	27.4	29.4	28.5	27.2	29.4	27.7	31.4
-5.01667	31.4	32	28.5	30.6	31.3	29.5	29.4	31.7		26.9	27.4	29.4	28.5	27.2	29.4	27.7	31.4
-5
-4.98333
-4.96667
-4.95
-4.93333
-4.91667
-4.9
-4.88333
-4.86667
-4.85
-4.83333
-4.81667
-4.8
-4.78333
-4.76667
-4.75
-4.73333
-4.71667
-4.7
-4.68333
-4.66667
-4.65
-4.63333
-4.61667
-4.6
-4.58333
-4.56667
-4.55
-4.53333
-4.51667
-4.5
-4.48333
-4.46667
-4.45
-4.43333
-4.41667
-4.4
-4.38333
-4.36667
-4.35
-4.33333
-4.31667
-4.3
-4.28333
-4.26667
-4.25
-4.23333
-4.21667
-4.2
-4.18333
-4.16667
-4.15
-4.13333
-4.11667
-4.1
-4.08333
-4.06667
-4.05
-4.03333
-4.01667
-4
-3.98333
-3.96667
-3.95
-3.93333
-3.91667
-3.9
-3.88333
-3.86667
-3.85
-3.83333
-3.81667
-3.8
-3.78333
-3.76667
-3.75
-3.73333
-3.71667
-3.7
-3.68333
-3.66667
-3.65
-3.63333
-3.61667
-3.6
-3.58333
-3.56667
-3.55
-3.53333
-3.51667
-3.5
-3.48333
-3.46667
-3.45
-3.43333
-3.41667
-3.4
-3.38333
-3.36667
-3.35
-3.33333
-3.31667
-3.3
-3.28333
-3.26667
-3.25
-3.23333
-3.21667
-3.2
-3.18333
-3.16667
-3.15
-3.13333
-3.11667
-3.1
-3.08333
-3.06667
-3.05
-3.03333
-3.01667
-3
-2.98333
-2.96667
-2.95
-2.93333
-2.91667
-2.9
-2.88333
-2.86667
-2.85
-2.83333
-2.81667
-2.8
-2.78333
-2.76667
-2.75
-2.73333
-2.71667
-2.7
-2.68333
-2.66667
-2.65
-2.63333
-2.61667
-2.6
-2.58333
-2.56667
-2.55
-2.53333
-2.51667
-2.5
-2.48333
-2.46667
-2.45
-2.43333
-2.41667
-2.4
-2.38333
-2.36667
-2.35
-2.33333
-2.31667
-2.3
-2.28333
-2.26667
-2.25
-2.23333
-2.21667
-2.2
-2.18333
-2.16667
-2.15
-2.13333
-2.11667
-2.1
-2.08333
-2.06667
-2.05
-2.03333
-2.01667
-2
-1.98333
-1.96667
-1.95
-1.93333
-1.91667
-1.9
-1.88333
-1.86667
-1.85
-1.83333
-1.81667
-1.8
-1.78333
-1.76667
-1.75
-1.73333
-1.71667
-1.7
-1.68333
-1.66667
-1.65
-1.63333
-1.61667
-1.6
-1.58333
-1.56667
-1.55
-1.53333
-1.51667
-1.5
-1.48333
-1.46667
-1.45
-1.43333
-1.41667
-1.4
-1.38333
-1.36667
-1.35
-1.33333
-1.31667
-1.3
-1.28333
-1.26667
-1.25
-1.23333
-1.21667
-1.2
-1.18333
-1.16667
-1.15
-1.13333
-1.11667
-1.1
-1.08333
-1.06667
-1.05
-1.03333
-1.01667
-1
-0.983333
-0.966667
-0.95
-0.933333
-0.916667
-0.9
-0.883333
-0.866667
-0.85
-0.833333
-0.816667
-0.8
-0.783333
-0.766667
-0.75
-0.733333
-0.716667
-0.7
-0.683333
-0.666667
-0.65
-0.633333
-0.616667
-0.6
-0.583333
-0.566667
-0.55
-0.533333
-0.516667
-0.5
-0.483333
-0.466667
-0.45
-0.433333
-0.416667
-0.4
-0.383333
-0.366667
-0.35
-0.333333
-0.316667
-0.3
-0.283333
-0.266667
-0.25
-0.233333
-0.216667
-0.2
-0.183333
-0.166667
-0.15
-0.133333
-0.116667
-0.1
-0.0833333
-0.0666667
-0.05
-0.0333333
-0.0166667
0	27.3	27.8	25.3	22.8	26.3	26	25.7	27.3		24.7	25.2	23.6	23.9	24.3	27	25.7	26.8
0.0166667	27.3	27.8	25.3	22.8	26.3	26	25.7	27.3		24.7	24.9	23.6	23.9	24.3	27	25.7	26.8
0.0333333	27.3	27.8	25.3	22.8	26.3	26	25.7	27.4		24.7	24.9	23.6	23.9	24.3	27	25.8	26.9
0.05	27.4	27.8	25.3	22.8	26.3	26	25.7	27.4		24.7	24.9	23.7	23.9	24.3	27	25.8	26.9
0.0666667	27.4	27.8	25.3	22.9	26.3	26	25.7	27.4		24.7	24.9	23.7	23.9	24.3	27	25.8	26.8
0.0833333	27.4	27.8	25.3	22.9	26.3	26.1	25.7	27.4		24.7	24.9	23.7	23.9	24.3	27	25.8	26.8
0.1	27.4	27.9	25.2	22.9	26.3	26.1	25.7	27.4		24.7	24.9	23.7	24	24.3	27	25.8	26.8
0.116667	27.4	27.9	25.2	22.9	26.3	26.1	25.7	27.4		24.7	24.9	23.7	24	24.4	27	25.8	26.9
0.133333	27.4	27.9	25.2	22.9	26.3	26.1	25.7	27.5		24.7	24.9	23.7	24	24.4	27	25.8	26.9
0.15	27.4	27.9	25.2	23	26.3	26.1	25.7	27.5		24.7	25	23.8	24	24.4	27	25.8	26.9
0.166667	27.4	27.9	25.2	23	26.3	26.1	25.7	27.5		24.7	25	23.8	24	24.4	27	25.8	26.9
0.183333	27.4	27.9	25.2	23	26.3	26.1	25.7	27.5		24.7	25	23.8	24	24.4	27	25.8	26.9
0.2	27.4	27.9	25.2	23	26.4	26.1	25.7	27.5		24.7	25	23.8	24	24.4	27	25.8	26.9
0.216667	27.4	28	25.2	23	26.4	26.1	25.7	27.6		24.7	25	23.8	24	24.4	27	25.8	26.9
0.233333	27.5	28	25.2	23.1	26.4	26.1	25.7	27.6		24.7	25	23.8	24	24.4	27	25.8	26.9
0.25	27.5	28	25.2	23.1	26.4	26.1	25.7	27.6		24.7	25	23.8	24	24.4	27	25.8	26.9
0.266667	27.5	28	25.2	23.1	26.4	26.1	25.7	27.6		24.7	25	23.9	24	24.4	27	25.8	26.9
0.283333	27.5	28	25.2	23.1	26.4	26.1	25.7	27.7		24.7	25	23.9	24	24.4	27	25.8	26.9
0.3	27.5	28	25.2	23.1	26.4	26.1	25.7	27.7		24.7	25	23.9	24	24.4	27	25.8	26.9
0.316667	27.5	28	25.2	23.2	26.4	26.1	25.7	27.7		24.7	25	23.9	24	24.4	27	25.8	26.9
0.333333	27.5	28	25.2	23.2	26.4	26.1	25.7	27.7		24.7	25	23.9	24	24.4	27	25.8	26.9
0.35	27.5	28	25.2	23.2	26.4	26.1	25.7	27.7		24.7	25	24	24	24.4	27	25.8	26.9
0.366667	27.5	28	25.2	23.2	26.4	26.1	25.7	27.8		24.8	25	24	24	24.5	27	25.8	26.9
0.383333	27.5	28.1	25.2	23.3	26.4	26.1	25.8	27.8		24.8	25	24	24	24.5	27	25.8	26.9
0.4	27.5	28.1	25.2	23.3	26.4	26.1	25.8	27.8		24.8	25	24	24	24.5	27	25.8	26.9
0.416667	27.6	28.1	25.2	23.3	26.5	26.1	25.8	27.9		24.7	25	24	24	24.5	27	25.8	26.9
0.433333	27.6	28.1	25.2	23.3	26.5	26.1	25.8	27.9		24.7	25	24	24	24.5	27	25.8	27
0.45	27.6	28.1	25.2	23.3	26.5	26.1	25.8	27.9		24.7	25	24	24.1	24.5	27	25.8	27
0.466667	27.6	28.1	25.2	23.4	26.5	26.2	25.8	28		24.7	25	24.1	24.1	24.5	27	25.8	27
0.483333	27.6	28.1	25.2	23.4	26.5	26.2	25.8	28		24.7	25	24.1	24.1	24.5	27	25.8	27
0.5	27.6	28.2	25.2	23.4	26.5	26.2	25.8	28		24.7	25	24.1	24.1	24.5	27	25.8	27
0.516667	27.6	28.2	25.2	23.4	26.5	26.2	25.8	28		24.7	25	24.1	24.1	24.5	27	25.8	27
0.533333	27.6	28.2	25.2	23.4	26.5	26.2	25.8	28		24.7	25	24.1	24.1	24.5	27	25.8	27
0.55	27.6	28.2	25.2	23.4	26.5	26.2	25.8	28.1		24.7	25	24.1	24.1	24.5	27	25.8	27
0.566667	27.6	28.2	25.2	23.5	26.5	26.2	25.8	28.1		24.7	25	24.1	24.1	24.6	27	25.8	27
0.583333	27.6	28.2	25.2	23.5	26.5	26.2	25.8	28.1		24.7	25	24.2	24.1	24.6	27	25.8	27
0.6	27.6	28.2	25.2	23.5	26.5	26.2	25.8	28.1		24.7	25	24.2	24.1	24.6	27	25.8	27
0.616667	27.6	28.2	25.2	23.5	26.6	26.2	25.8	28.2		24.7	25	24.2	24.2	24.6	27	25.8	27
0.633333	27.6	28.2	25.2	23.5	26.6	26.2	25.8	28.2		24.7	25	24.2	24.2	24.6	27	25.8	27
0.65	27.7	28.3	25.2	23.5	26.6	26.2	25.8	28.2		24.7	25	24.3	24.2	24.6	27	25.8	27
0.666667	27.7	28.3	25.2	23.6	26.6	26.2	25.8	28.2		24.7	25	24.3	24.2	24.6	27	25.8	27
0.683333	27.7	28.3	25.2	23.6	26.6	26.3	25.8	28.2		24.7	25	24.3	24.2	24.6	27	25.8	27
0.7	27.7	28.3	25.2	23.6	26.6	26.3	25.8	28.3		24.7	25	24.3	24.2	24.6	27	25.8	27
0.716667	27.7	28.3	25.2	23.6	26.6	26.3	25.8	28.3		24.7	25	24.3	24.2	24.6	27	25.8	27
0.733333	27.7	28.3	25.2	23.6	26.6	26.3	25.8	28.3		24.7	25	24.3	24.2	24.6	27	25.8	27
0.75	27.7	28.3	25.2	23.7	26.6	26.3	25.8	28.3		24.7	25	24.3	24.2	24.6	27	25.8	27
0.766667	27.7	28.3	25.2	23.7	26.6	26.3	25.8	28.3		24.7	25	24.3	24.2	24.6	27	25.8	27
0.783333	27.7	28.3	25.2	23.7	26.6	26.3	25.8	28.4		24.7	25	24.4	24.2	24.6	27	25.8	27
0.8	27.8	28.3	25.2	23.7	26.6	26.3	25.8	28.4		24.7	25	24.4	24.3	24.7	27	25.8	27
0.816667	27.8	28.3	25.2	23.7	26.7	26.3	25.8	28.4		24.7	25	24.4	24.3	24.7	27	25.8	27
0.833333	27.8	28.4	25.2	23.8	26.7	26.3	25.8	28.4		24.8	25	24.4	24.3	24.7	27	25.8	27
0.85	27.8	28.4	25.3	23.8	26.7	26.3	25.8	28.5		24.8	25	24.4	24.3	24.7	27	25.8	27
0.866667	27.8	28.4	25.3	23.8	26.7	26.3	25.8	28.5		24.8	25	24.4	24.3	24.7	27	25.8	27
0.883333	27.8	28.4	25.3	23.8	26.7	26.3	25.8	28.5		24.8	25	24.5	24.3	24.7	27	25.8	27
0.9	27.8	28.4	25.3	23.8	26.7	26.3	25.8	28.5		24.8	25	24.5	24.3	24.7	27	25.8	27
0.916667	27.8	28.4	25.3	23.9	26.7	26.3	25.8	28.5		24.8	25	24.5	24.3	24.7	27	25.8	27
0.933333	27.8	28.4	25.3	23.9	26.7	26.3	25.8	28.5		24.8	25	24.5	24.3	24.7	27	25.8	27
0.95	27.8	28.4	25.3	23.9	26.7	26.3	25.9	28.6		24.8	25	24.5	24.3	24.7	27	25.8	27.1
0.966667	27.8	28.4	25.3	23.9	26.7	26.3	25.9	28.6		24.8	25	24.5	24.3	24.7	26.9	25.8	27.1
0.983333	27.8	28.5	25.3	23.9	26.7	26.3	25.9	28.6		24.8	25	24.5	24.4	24.7	26.9	25.8	27.1
1	27.8	28.5	25.3	24	26.7	26.3	25.9	28.6		24.8	25	24.5	24.4	24.7	26.9	25.8	27.1
1.01667	27.8	28.5	25.3	24	26.7	26.3	25.9	28.6		24.8	25	24.6	24.4	24.8	26.9	25.8	27.1
1.03333	27.8	28.5	25.3	24	26.7	26.3	25.9	28.6		24.8	25	24.6	24.4	24.8	26.9	25.8	27.1
1.05	27.9	28.5	25.3	24	26.8	26.4	25.9	28.7		24.8	25	24.6	24.4	24.8	26.9	25.8	27.1
1.06667	27.9	28.5	25.3	24	26.8	26.3	25.9	28.7		24.8	25	24.6	24.4	24.8	26.9	25.8	27.1
1.08333	27.9	28.5	25.3	24.1	26.8	26.4	25.9	28.7		24.8	25	24.6	24.4	24.8	26.9	25.8	27.1
1.1	27.9	28.5	25.3	24.1	26.8	26.4	25.9	28.7		24.8	25	24.6	24.4	24.8	26.9	25.8	27.1
1.11667	27.9	28.5	25.3	24.1	26.8	26.4	25.9	28.7		24.8	25	24.6	24.4	24.8	26.9	25.8	27.1
1.13333	27.9	28.5	25.3	24.1	26.8	26.4	25.9	28.7		24.8	25	24.6	24.4	24.8	26.9	25.8	27.1
1.15	27.9	28.5	25.3	24.1	26.8	26.4	25.9	28.7		24.8	25	24.6	24.4	24.8	26.9	25.8	27.1
1.16667	27.9	28.6	25.3	24.1	26.8	26.4	25.9	28.8		24.8	25	24.7	24.4	24.8	26.9	25.8	27.1
1.18333	27.9	28.6	25.3	24.2	26.8	26.4	25.9	28.8		24.8	25	24.7	24.4	24.8	26.9	25.8	27.1
1.2	27.9	28.6	25.3	24.2	26.8	26.4	25.9	28.8		24.8	25	24.7	24.4	24.8	26.9	25.8	27.1
1.21667	27.9	28.6	25.3	24.2	26.8	26.4	25.9	28.8		24.8	25	24.7	24.4	24.8	26.9	25.8	27.1
1.23333	27.9	28.6	25.3	24.2	26.8	26.4	25.9	28.8		24.8	25	24.7	24.5	24.8	26.9	25.8	27.1
1.25	27.9	28.6	25.3	24.2	26.8	26.4	25.9	28.8		24.8	25	24.7	24.5	24.8	26.9	25.8	27.1
1.26667	27.9	28.6	25.3	24.2	26.8	26.4	25.9	28.8		24.8	25	24.7	24.5	24.8	26.9	25.8	27.1
1.28333	27.9	28.7	25.3	24.2	26.8	26.4	25.9	28.8		24.8	25	24.7	24.5	24.8	26.9	25.8	27.1
1.3	27.9	28.7	25.3	24.3	26.9	26.4	25.9	28.8		24.8	25	24.7	24.5	24.8	26.9	25.7	27.1
1.31667	27.9	28.7	25.3	24.3	26.9	26.4	25.9	28.8		24.8	25	24.8	24.5	24.8	26.9	25.7	27.1
1.33333	27.9	28.7	25.3	24.3	26.9	26.4	25.9	28.9		24.8	25	24.8	24.5	24.8	26.9	25.8	27.1
1.35	27.9	28.7	25.3	24.3	26.9	26.4	25.9	28.9		24.8	25	24.8	24.5	24.8	26.9	25.8	27.1
1.36667	27.9	28.7	25.3	24.3	26.9	26.4	25.9	28.9		24.8	25	24.8	24.5	24.8	26.9	25.8	27.1
1.38333	27.9	28.7	25.3	24.3	26.9	26.4	25.9	28.9		24.9	25	24.8	24.5	24.8	26.9	25.8	27.1
1.4	27.9	28.7	25.3	24.3	26.9	26.5	25.9	28.9		24.8	25	24.8	24.5	24.8	26.9	25.8	27.1
1.41667	27.9	28.7	25.3	24.3	26.9	26.5	25.9	28.9		24.9	25	24.8	24.5	24.8	26.9	25.7	27.1
1.43333	27.9	28.8	25.3	24.4	26.9	26.5	25.9	28.9		24.8	25.1	24.8	24.5	24.8	26.9	25.8	27.1
1.45	28	28.8	25.3	24.4	26.9	26.5	25.9	28.9		24.9	25.1	24.9	24.5	24.8	26.9	25.8	27.1
1.46667	28	28.8	25.3	24.4	26.9	26.5	25.9	28.9		24.9	25.1	24.9	24.5	24.8	26.9	25.8	27.1
1.48333	28	28.8	25.3	24.4	26.9	26.5	25.9	28.9		24.8	25.1	24.9	24.6	24.8	26.9	25.8	27.1
1.5	28	28.8	25.3	24.4	26.9	26.5	25.9	28.9		24.8	25.1	24.9	24.6	24.8	26.9	25.8	27.1
1.51667	28	28.8	25.3	24.4	26.9	26.5	25.9	28.9		24.9	25.1	24.9	24.6	24.8	26.9	25.8	27.1
1.53333	28	28.8	25.3	24.4	26.9	26.5	25.9	29		24.8	25.1	24.9	24.6	24.8	26.9	25.8	27.1
1.55	28	28.9	25.3	24.5	27	26.5	25.9	29		24.8	25.1	24.9	24.6	24.8	26.9	25.8	27.1
1.56667	28	28.9	25.3	24.5	27	26.5	25.9	29		24.8	25.1	24.9	24.6	24.8	26.9	25.8	27.1
1.58333	28	28.9	25.3	24.5	27	26.5	25.9	29		24.8	25.1	25	24.6	24.8	26.9	25.8	27.1
1.6	28	28.9	25.3	24.5	27	26.5	25.9	29		24.8	25.1	25	24.6	24.8	26.9	25.8	27.1
1.61667	28.1	28.9	25.3	24.5	27	26.5	25.9	29		24.8	25.1	25	24.6	24.8	26.9	25.8	27.1
1.63333	28.1	28.9	25.3	24.5	27	26.5	26	29		24.8	25.1	25	24.6	24.8	26.9	25.8	27.1
1.65	28.1	28.9	25.3	24.5	27	26.5	25.9	29		24.8	25.1	25	24.7	24.8	26.9	25.8	27.2
1.66667	28.1	28.9	25.3	24.6	27	26.5	26	29		24.8	25.1	25	24.7	24.8	26.9	25.8	27.2
1.68333	28.1	29	25.3	24.6	27	26.5	26	29		24.8	25.1	25	24.7	24.8	26.9	25.8	27.2
1.7	28.1	29	25.3	24.6	27	26.5	26	29		24.9	25.1	25	24.7	24.8	26.9	25.8	27.2
1.71667	28.1	29	25.3	24.6	27	26.5	26	29.1		24.9	25.1	25	24.7	24.8	26.9	25.8	27.2
1.73333	28.1	29	25.3	24.6	27	26.5	26	29.1		24.9	25.1	25	24.7	24.8	26.9	25.8	27.2
1.75	28.1	29	25.3	24.6	27	26.5	26	29.1		24.9	25.1	25.1	24.7	24.8	26.9	25.8	27.2
1.76667	28.1	29	25.3	24.6	27	26.5	26	29.1		24.9	25.2	25.1	24.7	24.8	26.9	25.8	27.2
1.78333	28.1	29	25.3	24.6	27	26.5	26	29.1		24.9	25.2	25.1	24.7	24.8	26.9	25.8	27.2
1.8	28.1	29	25.3	24.6	27	26.5	26	29.1		24.9	25.2	25.1	24.7	24.8	26.9	25.8	27.2
1.81667	28.2	29.1	25.3	24.7	27	26.5	26	29.1		24.9	25.1	25.1	24.7	24.8	26.9	25.8	27.2
1.83333	28.2	29.1	25.3	24.7	27	26.5	26	29.1		24.9	25.2	25.1	24.7	24.9	26.9	25.8	27.2
1.85	28.2	29.1	25.3	24.7	27	26.5	26	29.1		24.9	25.2	25.1	24.7	24.9	26.9	25.8	27.2
1.86667	28.2	29.1	25.3	24.7	27	26.5	26	29.1		24.9	25.2	25.1	24.7	24.9	26.9	25.8	27.2
1.88333	28.2	29.1	25.3	24.7	27	26.5	26	29.2		24.9	25.2	25.1	24.8	24.9	26.9	25.8	27.2
1.9	28.2	29.1	25.3	24.7	27	26.5	26	29.1		24.9	25.2	25.1	24.8	24.9	26.9	25.8	27.2
1.91667	28.2	29.2	25.3	24.7	27	26.7	26	29.1		24.9	25.1	25.1	24.8	24.9	26.9	25.8	27.2
1.93333	28.2	29.2	25.3	24.7	27	26.7	26	29.2		24.9	25.1	25.1	24.8	24.9	26.9	25.8	27.2
1.95	28.2	29.2	25.3	24.7	27	26.7	26	29.2		24.9	25.1	25.1	24.8	24.9	26.9	25.8	27.2
1.96667	28.3	29.2	25.3	24.7	27	26.6	26	29.2		24.9	25.1	25.1	24.8	24.9	26.9	25.7	27.2
1.98333	28.3	29.2	25.3	24.8	27	26.6	26	29.2		24.9	25.1	25.1	24.8	24.9	26.9	25.7	27.2
2	28.3	29.2	25.3	24.8	27.1	26.6	26.1	29.2		24.9	25.1	25.1	24.8	24.9	26.9	25.7	27.2
2.01667	28.3	29.3	25.3	24.8	27	26.6	26	29.1		24.9	25.1	25.2	24.8	24.9	26.9	25.7	27.2
2.03333	28.3	29.3	25.3	24.8	27.1	26.6	26	29.1		24.9	25.1	25.2	24.8	24.9	26.9	25.7	27.2
2.05	28.3	29.3	25.3	24.8	27	26.6	26	29.2		24.9	25.1	25.2	24.8	24.9	26.9	25.7	27.2
2.06667	28.3	29.3	25.3	24.8	27	26.6	26	29.2		24.9	25.1	25.2	24.8	24.9	26.9	25.7	27.2
2.08333	28.3	29.3	25.3	24.9	27.1	26.6	26	29.2		24.9	25.1	25.2	24.8	24.9	26.9	25.7	27.2
2.1	28.3	29.3	25.3	24.9	27.1	26.7	26	29.2		24.9	25.1	25.2	24.8	24.9	26.9	25.7	27.2
2.11667	28.3	29.3	25.3	24.9	27.1	26.7	26	29.2		24.9	25.1	25.2	24.8	24.9	27	25.7	27.2
2.13333	28.3	29.3	25.3	24.9	27.1	26.7	26.1	29.2		24.9	25.1	25.2	24.9	24.9	26.9	25.7	27.2
2.15	28.3	29.3	25.3	24.9	27.1	26.7	26.1	29.2		24.9	25.1	25.2	24.9	24.9	26.9	25.7	27.2
2.16667	28.3	29.4	25.3	24.9	27.1	26.7	26.1	29.2		24.9	25.1	25.2	24.9	24.9	26.9	25.7	27.2
2.18333	28.3	29.4	25.3	24.9	27.1	26.6	26.1	29.2		24.9	25.1	25.2	24.9	24.9	26.9	25.7	27.2
2.2	28.4	29.4	25.3	25	27.1	26.6	26.1	29.2		24.9	25.1	25.2	24.9	24.9	26.9	25.7	27.2
2.21667	28.4	29.4	25.3	25	27.1	26.6	26.1	29.2		24.9	25.1	25.2	25.1	24.9	26.9	25.7	27.2
2.23333	28.4	29.4	25.3	25	27.1	26.6	26.1	29.2		24.9	25.1	25.2	25.1	24.9	26.9	25.7	27.2
2.25	28.4	29.4	25.3	25	27.1	26.6	26.1	29.2		24.9	25.1	25.2	25.1	24.9	26.9	25.7	27.2
2.26667	28.4	29.5	25.3	25	27.1	26.6	26.1	29.2		24.8	25.1	25.2	25.2	25	26.9	25.7	27.2
2.28333	28.4	29.5	25.3	25	27.1	26.6	26.1	29.3		24.9	25.1	25.2	25.2	25	26.9	25.7	27.3
2.3	28.4	29.5	25.3	25	27.1	26.6	26.1	29.3		24.8	25.1	25.2	25.2	25	26.9	25.7	27.3
2.31667	28.4	29.5	25.3	25	27.1	26.6	26.1	29.3		24.9	25.1	25.2	25.2	25	26.9	25.7	27.3
2.33333	28.4	29.5	25.3	25	27.1	26.6	26.1	29.3		24.8	25.1	25.2	25.2	25	26.9	25.6	27.3
2.35	28.5	29.5	25.3	25	27.1	26.6	26.1	29.3		24.8	25.1	25.2	25.2	25	26.9	25.6	27.3
2.36667	28.5	29.5	25.3	25	27.1	26.6	26.1	29.3		24.8	25.1	25.2	25.2	25	26.9	25.6	27.3
2.38333	28.5	29.5	25.3	25	27.1	26.6	26.1	29.3		24.8	25.1	25.2	25.2	25	26.9	25.6	27.3
2.4	28.5	29.5	25.3	25	27.2	26.6	26.1	29.3		24.8	25.2	25.2	25.2	25	26.9	25.6	27.3
2.41667	28.5	29.6	25.3	25	27.2	26.7	26.1	29.4		24.8	25.1	25.2	25.2	25	26.9	25.6	27.3
2.43333	28.5	29.6	25.3	25	27.1	26.7	26.1	29.4		24.8	25.2	25.2	25.2	25	26.9	25.6	27.3
2.45	28.5	29.6	25.4	25	27.2	26.7	26.1	29.4		24.8	25.2	25.2	25.2	25	26.9	25.6	27.3
2.46667	28.5	29.6	25.3	25	27.2	26.7	26.1	29.4		24.8	25.2	25.2	25.2	25	26.9	25.6	27.3
2.48333	28.5	29.6	25.3	25	27.2	26.7	26.1	29.4		24.8	25.2	25.2	25.2	25	26.9	25.6	27.3
2.5	28.5	29.6	25.3	25	27.2	26.7	26.1	29.4		24.8	25.2	25.2	25.2	25.1	26.9	25.6	27.3
2.51667	28.5	29.6	25.4	25.1	27.2	26.7	26.1	29.4		24.8	25.2	25.2	25.2	25.1	26.9	25.6	27.3
2.53333	28.5	29.6	25.3	25.1	27.2	26.7	26.1	29.4		24.8	25.2	25.2	25.3	25.1	27	25.6	27.3
2.55	28.5	29.6	25.3	25.1	27.2	26.7	26.1	29.5		24.8	25.2	25.2	25.3	25.1	27	25.6	27.3
2.56667	28.5	29.7	25.4	25.1	27.2	26.7	26.1	29.5		24.8	25.2	25.2	25.3	25.1	27	25.6	27.3
2.58333	28.5	29.7	25.4	25.1	27.2	26.7	26.1	29.5		24.8	25.2	25.3	25.3	25.1	27	25.6	27.3
2.6	28.6	29.7	25.3	25.1	27.3	26.7	26.1	29.5		24.8	25.2	25.3	25.3	25.1	27	25.6	27.3
2.61667	28.6	29.7	25.3	25.1	27.3	26.7	26.1	29.5		24.8	25.2	25.3	25.3	25.1	27	25.6	27.3
2.63333	28.6	29.7	25.3	25.1	27.3	26.7	26.1	29.5		24.8	25.2	25.3	25.3	25.1	27	25.6	27.3
2.65	28.6	29.7	25.3	25.1	27.3	26.7	26.1	29.5		24.8	25.2	25.3	25.3	25.1	27	25.6	27.3
2.66667	28.6	29.7	25.3	25.1	27.3	26.7	26.1	29.5		24.8	25.2	25.3	25.3	25.1	27	25.6	27.3
2.68333	28.6	29.7	25.3	25.1	27.3	26.7	26.1	29.5		24.8	25.2	25.3	25.3	25.1	27	25.6	27.3
2.7	28.6	29.8	25.3	25.1	27.3	26.7	26.1	29.5		24.8	25.2	25.3	25.3	25.1	27	25.6	27.3
2.71667	28.7	29.8	25.3	25.1	27.3	26.7	26.1	29.5		24.8	25.2	25.3	25.3	25.1	27	25.6	27.4
2.73333	28.7	29.8	25.3	25.1	27.3	26.7	26.1	29.5		24.8	25.2	25.3	25.3	25.1	27	25.6	27.4
2.75	28.7	29.8	25.3	25.2	27.3	26.7	26.1	29.5		24.9	25.2	25.3	25.3	25.1	27	25.6	27.4
2.76667	28.7	29.8	25.3	25.2	27.3	26.7	26.1	29.5		24.9	25.2	25.3	25.3	25.1	27	25.6	27.4
2.78333	28.7	29.8	25.3	25.2	27.3	26.7	26.2	29.5		24.9	25.2	25.3	25.3	25.1	27	25.6	27.4
2.8	28.7	29.8	25.3	25.2	27.3	26.7	26.2	29.5		24.9	25.2	25.3	25.3	25.1	27	25.6	27.4
2.81667	28.7	29.8	25.3	25.2	27.3	26.7	26.2	29.6		24.9	25.2	25.3	25.3	25.1	27.1	25.6	27.4
2.83333	28.7	29.8	25.4	25.2	27.3	26.7	26.2	29.6		24.9	25.2	25.3	25.3	25.2	27.1	25.6	27.4
2.85	28.7	29.9	25.4	25.2	27.3	26.7	26.2	29.6		24.9	25.2	25.3	25.3	25.2	27.1	25.6	27.4
2.86667	28.7	29.9	25.4	25.2	27.3	26.7	26.2	29.6		24.9	25.2	25.3	25.3	25.2	27.1	25.6	27.4
2.88333	28.7	29.9	25.4	25.2	27.3	26.7	26.2	29.6		24.9	25.2	25.3	25.3	25.2	27.1	25.6	27.4
2.9	28.7	29.9	25.3	25.2	27.3	26.7	26.2	29.6		24.9	25.2	25.3	25.4	25.2	27.1	25.6	27.4
2.91667	28.7	29.9	25.4	25.2	27.3	26.7	26.2	29.6		24.9	25.2	25.3	25.4	25.2	27.1	25.6	27.4
2.93333	28.7	29.9	25.4	25.2	27.3	26.7	26.2	29.6		24.9	25.2	25.3	25.4	25.2	27.1	25.6	27.4
2.95	28.8	29.9	25.4	25.3	27.3	26.7	26.2	29.6		24.9	25.2	25.3	25.4	25.2	27.1	25.6	27.4
2.96667	28.8	29.9	25.3	25.3	27.3	26.7	26.3	29.6		24.9	25.2	25.3	25.4	25.2	27.1	25.6	27.4
2.98333	28.8	29.9	25.3	25.3	27.3	26.7	26.3	29.6		24.9	25.2	25.3	25.4	25.2	27.1	25.6	27.4
3	28.8	29.9	25.4	25.3	27.3	26.8	26.3	29.6		24.9	25.2	25.3	25.4	25.2	27.1	25.6	27.4
3.01667	28.8	29.9	25.4	25.3	27.3	26.8	26.3	29.6		24.9	25.3	25.3	25.4	25.2	27.1	25.6	27.4
3.03333	28.8	30	25.4	25.3	27.3	26.8	26.3	29.6		24.9	25.3	25.3	25.4	25.2	27.1	25.5	27.4
3.05	28.8	30	25.4	25.3	27.4	26.8	26.3	29.6		24.9	25.3	25.3	25.4	25.2	27.1	25.6	27.4
3.06667	28.9	30	25.4	25.3	27.4	26.8	26.3	29.6		24.9	25.3	25.3	25.4	25.2	27.1	25.5	27.4
3.08333	28.9	30	25.4	25.3	27.4	26.8	26.3	29.6		24.9	25.3	25.3	25.4	25.2	27.1	25.6	27.4
3.1	28.9	30	25.4	25.3	27.4	26.8	26.3	29.6		24.9	25.3	25.3	25.4	25.2	27.1	25.5	27.4
3.11667	28.9	30	25.4	25.4	27.4	26.8	26.3	29.6		24.9	25.3	25.3	25.4	25.2	27.1	25.5	27.4
3.13333	28.9	30	25.4	25.4	27.4	26.8	26.3	29.6		24.9	25.3	25.3	25.4	25.2	27.1	25.5	27.4
3.15	28.9	30	25.4	25.4	27.4	26.8	26.3	29.6		24.9	25.3	25.3	25.4	25.2	27.1	25.5	27.4
3.16667	28.9	30	25.3	25.4	27.4	26.8	26.3	29.6		24.9	25.3	25.3	25.4	25.2	27.1	25.5	27.4
3.18333	28.9	30	25.4	25.4	27.4	26.8	26.3	29.6		24.9	25.3	25.3	25.4	25.2	27.1	25.5	27.4
3.2	28.9	30	25.4	25.4	27.4	26.8	26.3	29.6		24.9	25.3	25.3	25.4	25.2	27.1	25.6	27.4
3.21667	28.9	30.1	25.4	25.4	27.4	26.8	26.3	29.6		25	25.3	25.3	25.4	25.2	27.1	25.6	27.4
3.23333	28.9	30.1	25.4	25.4	27.4	26.8	26.3	29.6		25	25.3	25.3	25.4	25.2	27.1	25.6	27.4
3.25	28.9	30.1	25.4	25.4	27.4	26.8	26.3	29.6		25	25.3	25.3	25.4	25.2	27.1	25.6	27.4
3.26667	28.9	30.1	25.4	25.4	27.5	26.8	26.3	29.6		24.9	25.3	25.4	25.4	25.2	27.1	25.6	27.4
3.28333	28.9	30.1	25.4	25.4	27.5	26.8	26.3	29.6		24.9	25.3	25.4	25.4	25.2	27.1	25.6	27.4
3.3	28.9	30.1	25.4	25.5	27.5	26.8	26.3	29.6		24.9	25.3	25.4	25.4	25.3	27.1	25.6	27.4
3.31667	29	30.1	25.4	25.5	27.5	26.8	26.3	29.6		24.9	25.3	25.4	25.4	25.3	27.1	25.6	27.4
3.33333	29	30.1	25.4	25.5	27.5	26.9	26.3	29.6		24.9	25.3	25.4	25.4	25.3	27.1	25.6	27.4
3.35	29	30.1	25.4	25.5	27.5	26.9	26.3	29.6		24.9	25.3	25.4	25.4	25.3	27.1	25.6	27.4
3.36667	29	30.1	25.4	25.5	27.5	26.9	26.3	29.6		24.9	25.3	25.4	25.4	25.3	27.1	25.6	27.4
3.38333	29	30.1	25.4	25.5	27.5	26.9	26.3	29.5		24.9	25.3	25.4	25.4	25.3	27.1	25.6	27.4
3.4	29	30.2	25.4	25.5	27.5	26.9	26.3	29.5		25	25.3	25.4	25.4	25.3	27.1	25.6	27.4
3.41667	29	30.2	25.4	25.5	27.5	26.9	26.3	29.5		25	25.3	25.4	25.4	25.3	27.1	25.6	27.4
3.43333	29	30.2	25.4	25.5	27.5	26.9	26.3	29.5		25	25.3	25.4	25.4	25.3	27.1	25.6	27.4
3.45	29	30.2	25.4	25.5	27.5	26.9	26.3	29.5		25	25.3	25.4	25.4	25.2	27.1	25.6	27.4
3.46667	29	30.2	25.4	25.5	27.5	26.9	26.3	29.5		25	25.4	25.4	25.4	25.2	27.1	25.6	27.4
3.48333	29.1	30.2	25.4	25.5	27.5	26.9	26.3	29.6		25	25.4	25.4	25.4	25.2	27.1	25.6	27.4
3.5	29.1	30.2	25.4	25.5	27.5	26.9	26.3	29.6		25	25.4	25.4	25.4	25.2	27.1	25.6	27.4
3.51667	29.1	30.2	25.4	25.6	27.5	26.9	26.3	29.6		25	25.4	25.4	25.4	25.2	27.1	25.6	27.4
3.53333	29.1	30.2	25.4	25.6	27.5	26.9	26.3	29.6		25	25.4	25.5	25.4	25.2	27.2	25.6	27.4
3.55	29.1	30.2	25.4	25.6	27.6	26.9	26.3	29.6		25	25.4	25.5	25.4	25.2	27.1	25.6	27.4
3.56667	29.1	30.2	25.4	25.6	27.6	26.9	26.3	29.6		25	25.4	25.5	25.4	25.2	27.1	25.6	27.4
3.58333	29.1	30.3	25.4	25.6	27.6	26.9	26.3	29.6		25	25.4	25.5	25.4	25.2	27.2	25.6	27.4
3.6	29.1	30.3	25.4	25.6	27.6	26.9	26.3	29.6		25	25.4	25.4	25.4	25.2	27.1	25.6	27.4
3.61667	29.1	30.3	25.4	25.6	27.6	26.9	26.3	29.7		25	25.4	25.5	25.4	25.2	27.1	25.6	27.4
3.63333	29.2	30.3	25.4	25.6	27.6	26.9	26.3	29.7		25	25.4	25.5	25.5	25.2	27.1	25.7	27.4
3.65	29.2	30.3	25.4	25.6	27.6	26.9	26.3	29.7		25	25.4	25.5	25.5	25.2	27.1	25.7	27.4
3.66667	29.2	30.3	25.4	25.6	27.6	26.9	26.3	29.7		25	25.4	25.5	25.5	25.2	27.1	25.7	27.4
3.68333	29.2	30.3	25.4	25.6	27.6	26.9	26.3	29.7		25	25.4	25.5	25.5	25.2	27.1	25.7	27.4
3.7	29.2	30.3	25.4	25.7	27.6	26.9	26.3	29.7		25	25.4	25.5	25.5	25.2	27.1	25.7	27.4
3.71667	29.2	30.3	25.4	25.7	27.6	26.9	26.3	29.7		25	25.5	25.5	25.5	25.2	27.1	25.7	27.4
3.73333	29.2	30.3	25.4	25.7	27.6	26.9	26.3	29.8		25	25.5	25.5	25.5	25.2	27.1	25.7	27.4
3.75	29.2	30.3	25.4	25.7	27.6	26.9	26.3	29.8		25	25.5	25.5	25.5	25.2	27.1	25.7	27.4
3.76667	29.2	30.3	25.4	25.7	27.6	26.9	26.3	29.8		25	25.5	25.5	25.5	25.3	27.1	25.7	27.4
3.78333	29.3	30.3	25.4	25.7	27.7	26.9	26.3	29.8		25	25.5	25.5	25.5	25.3	27.1	25.7	27.4
3.8	29.3	30.3	25.4	25.7	27.7	26.9	26.3	29.8		25	25.5	25.5	25.5	25.3	27.1	25.7	27.4
3.81667	29.3	30.4	25.4	25.7	27.7	26.9	26.3	29.8		25.1	25.5	25.5	25.5	25.3	27.1	25.7	27.4
3.83333	29.3	30.4	25.4	25.7	27.7	26.9	26.3	29.8		25.1	25.5	25.5	25.5	25.3	27.1	25.7	27.4
[truncated: 1,570 more rows]

## Sheet: Oxygen Saturation (Fig 2g)
Source data for Figure 2G-I
[truncated: 2,403 more rows]

[truncated: 10 more sheets: BF data withantagonist (Fig 4a), BF data A967 (Fig 4b), BF data AMTB (Fig 4c), BF - Menthol (Fig 5a), BF - CA (Fig 5d), BF - Capsaicin (Fig 5g), BF - NA (Fig 6a), BF - Medetomidine (Fig 6c), Calcium imaging data (Fig 7d), Calcium imaging data (Fig 7f)]
